# Supplementary material
Source: ML conference proceedings conference paper supplement (https://proceedings.neurips.cc/paper_files/paper/2022/hash/35f805e65c77652efa731edc10c8e3a6-Abstract.html)
Supplement: Supplementary file 1 [file 35f805e65c77652efa731edc10c8e3a6-Supplemental-Conference.zip]

Archive with 1,867 entries (1,716 files):
- Supplementary Material/
- Supplementary Material/.DS_Store
- __MACOSX/
- __MACOSX/Supplementary Material/
- __MACOSX/Supplementary Material/._.DS_Store
- Supplementary Material/code/
- Supplementary Material/code/ref.de
- __MACOSX/Supplementary Material/code/
- __MACOSX/Supplementary Material/code/._ref.de
- Supplementary Material/code/CODE_OF_CONDUCT.md
- __MACOSX/Supplementary Material/code/._CODE_OF_CONDUCT.md
- Supplementary Material/code/LICENSE
- __MACOSX/Supplementary Material/code/._LICENSE
- Supplementary Material/code/preprocess.py
- __MACOSX/Supplementary Material/code/._preprocess.py
- Supplementary Material/code/generate.py
- __MACOSX/Supplementary Material/code/._generate.py
- Supplementary Material/code/multi-bleu.perl
- __MACOSX/Supplementary Material/code/._multi-bleu.perl
- Supplementary Material/code/average.sh
- __MACOSX/Supplementary Material/code/._average.sh
- Supplementary Material/code/LossCTC.cu
- __MACOSX/Supplementary Material/code/._LossCTC.cu
- Supplementary Material/code/tests/
- Supplementary Material/code/tests/test_dictionary.py
- __MACOSX/Supplementary Material/code/tests/
- __MACOSX/Supplementary Material/code/tests/._test_dictionary.py
- Supplementary Material/code/tests/test_bmuf.py
- __MACOSX/Supplementary Material/code/tests/._test_bmuf.py
- Supplementary Material/code/tests/test_utils.py
- __MACOSX/Supplementary Material/code/tests/._test_utils.py
- Supplementary Material/code/tests/test_iterators.py
- __MACOSX/Supplementary Material/code/tests/._test_iterators.py
- Supplementary Material/code/tests/test_noising.py
- __MACOSX/Supplementary Material/code/tests/._test_noising.py
- Supplementary Material/code/tests/test_sparse_multihead_attention.py
- __MACOSX/Supplementary Material/code/tests/._test_sparse_multihead_attention.py
- Supplementary Material/code/tests/test_metrics.py
- __MACOSX/Supplementary Material/code/tests/._test_metrics.py
- Supplementary Material/code/tests/test_train.py
- __MACOSX/Supplementary Material/code/tests/._test_train.py
- Supplementary Material/code/tests/test_sequence_scorer.py
- __MACOSX/Supplementary Material/code/tests/._test_sequence_scorer.py
- Supplementary Material/code/tests/test_multihead_attention.py
- __MACOSX/Supplementary Material/code/tests/._test_multihead_attention.py
- Supplementary Material/code/tests/test_resampling_dataset.py
- __MACOSX/Supplementary Material/code/tests/._test_resampling_dataset.py
- Supplementary Material/code/tests/__init__.py
- __MACOSX/Supplementary Material/code/tests/.___init__.py
- Supplementary Material/code/tests/test_backtranslation_dataset.py
- __MACOSX/Supplementary Material/code/tests/._test_backtranslation_dataset.py
- Supplementary Material/code/tests/speech_recognition/
- Supplementary Material/code/tests/speech_recognition/asr_test_base.py
- __MACOSX/Supplementary Material/code/tests/speech_recognition/
- __MACOSX/Supplementary Material/code/tests/speech_recognition/._asr_test_base.py
- Supplementary Material/code/tests/speech_recognition/test_collaters.py
- __MACOSX/Supplementary Material/code/tests/speech_recognition/._test_collaters.py
- Supplementary Material/code/tests/speech_recognition/test_cross_entropy.py
- __MACOSX/Supplementary Material/code/tests/speech_recognition/._test_cross_entropy.py
- Supplementary Material/code/tests/speech_recognition/test_vggtransformer.py
- __MACOSX/Supplementary Material/code/tests/speech_recognition/._test_vggtransformer.py
- Supplementary Material/code/tests/speech_recognition/__init__.py
- __MACOSX/Supplementary Material/code/tests/speech_recognition/.___init__.py
- __MACOSX/Supplementary Material/code/tests/._speech_recognition
- Supplementary Material/code/tests/test_binaries.py
- __MACOSX/Supplementary Material/code/tests/._test_binaries.py
- Supplementary Material/code/tests/test_label_smoothing.py
- __MACOSX/Supplementary Material/code/tests/._test_label_smoothing.py
- Supplementary Material/code/tests/utils.py
- __MACOSX/Supplementary Material/code/tests/._utils.py
- Supplementary Material/code/tests/test_convtbc.py
- __MACOSX/Supplementary Material/code/tests/._test_convtbc.py
- Supplementary Material/code/tests/test_memory_efficient_fp16.py
- __MACOSX/Supplementary Material/code/tests/._test_memory_efficient_fp16.py
- Supplementary Material/code/tests/test_token_block_dataset.py
- __MACOSX/Supplementary Material/code/tests/._test_token_block_dataset.py
- Supplementary Material/code/tests/test_sequence_generator.py
- __MACOSX/Supplementary Material/code/tests/._test_sequence_generator.py
- Supplementary Material/code/tests/test_concat_dataset.py
- __MACOSX/Supplementary Material/code/tests/._test_concat_dataset.py
- Supplementary Material/code/tests/test_file_io.py
- __MACOSX/Supplementary Material/code/tests/._test_file_io.py
- Supplementary Material/code/tests/test_reproducibility.py
- __MACOSX/Supplementary Material/code/tests/._test_reproducibility.py
- Supplementary Material/code/tests/test_character_token_embedder.py
- __MACOSX/Supplementary Material/code/tests/._test_character_token_embedder.py
- Supplementary Material/code/tests/test_average_checkpoints.py
- __MACOSX/Supplementary Material/code/tests/._test_average_checkpoints.py
- Supplementary Material/code/tests/test_export.py
- __MACOSX/Supplementary Material/code/tests/._test_export.py
- Supplementary Material/code/tests/test_multi_corpus_sampled_dataset.py
- __MACOSX/Supplementary Material/code/tests/._test_multi_corpus_sampled_dataset.py
- __MACOSX/Supplementary Material/code/._tests
- Supplementary Material/code/fairseq/
- Supplementary Material/code/fairseq/benchmark/
- Supplementary Material/code/fairseq/benchmark/dummy_masked_lm.py
- __MACOSX/Supplementary Material/code/fairseq/
- __MACOSX/Supplementary Material/code/fairseq/benchmark/
- __MACOSX/Supplementary Material/code/fairseq/benchmark/._dummy_masked_lm.py
- Supplementary Material/code/fairseq/benchmark/dummy_lm.py
- __MACOSX/Supplementary Material/code/fairseq/benchmark/._dummy_lm.py
- Supplementary Material/code/fairseq/benchmark/dummy_model.py
- __MACOSX/Supplementary Material/code/fairseq/benchmark/._dummy_model.py
- __MACOSX/Supplementary Material/code/fairseq/._benchmark
- Supplementary Material/code/fairseq/legacy_distributed_data_parallel.py
- __MACOSX/Supplementary Material/code/fairseq/._legacy_distributed_data_parallel.py
- Supplementary Material/code/fairseq/options.py
- __MACOSX/Supplementary Material/code/fairseq/._options.py
- Supplementary Material/code/fairseq/metrics.py
- __MACOSX/Supplementary Material/code/fairseq/._metrics.py
- Supplementary Material/code/fairseq/tasks/
- Supplementary Material/code/fairseq/tasks/fairseq_task.py
- __MACOSX/Supplementary Material/code/fairseq/tasks/
- __MACOSX/Supplementary Material/code/fairseq/tasks/._fairseq_task.py
- Supplementary Material/code/fairseq/tasks/denoising.py
- __MACOSX/Supplementary Material/code/fairseq/tasks/._denoising.py
- Supplementary Material/code/fairseq/tasks/multilingual_translation.py
- __MACOSX/Supplementary Material/code/fairseq/tasks/._multilingual_translation.py
- Supplementary Material/code/fairseq/tasks/translation_lev.py
- __MACOSX/Supplementary Material/code/fairseq/tasks/._translation_lev.py
- Supplementary Material/code/fairseq/tasks/language_modeling.py
- __MACOSX/Supplementary Material/code/fairseq/tasks/._language_modeling.py
- Supplementary Material/code/fairseq/tasks/legacy_masked_lm.py
- __MACOSX/Supplementary Material/code/fairseq/tasks/._legacy_masked_lm.py
- Supplementary Material/code/fairseq/tasks/__init__.py
- __MACOSX/Supplementary Material/code/fairseq/tasks/.___init__.py
- Supplementary Material/code/fairseq/tasks/__pycache__/
- Supplementary Material/code/fairseq/tasks/__pycache__/semisupervised_translation.cpython-38.pyc
- __MACOSX/Supplementary Material/code/fairseq/tasks/__pycache__/
- __MACOSX/Supplementary Material/code/fairseq/tasks/__pycache__/._semisupervised_translation.cpython-38.pyc
- Supplementary Material/code/fairseq/tasks/__pycache__/__init__.cpython-38.pyc
- __MACOSX/Supplementary Material/code/fairseq/tasks/__pycache__/.___init__.cpython-38.pyc
- Supplementary Material/code/fairseq/tasks/__pycache__/audio_pretraining.cpython-38.pyc
- __MACOSX/Supplementary Material/code/fairseq/tasks/__pycache__/._audio_pretraining.cpython-38.pyc
- Supplementary Material/code/fairseq/tasks/__pycache__/fairseq_task.cpython-36.pyc
- __MACOSX/Supplementary Material/code/fairseq/tasks/__pycache__/._fairseq_task.cpython-36.pyc
- Supplementary Material/code/fairseq/tasks/__pycache__/translation_moe.cpython-36.pyc
- __MACOSX/Supplementary Material/code/fairseq/tasks/__pycache__/._translation_moe.cpython-36.pyc
- Supplementary Material/code/fairseq/tasks/__pycache__/multilingual_translation.cpython-36.pyc
- __MACOSX/Supplementary Material/code/fairseq/tasks/__pycache__/._multilingual_translation.cpython-36.pyc
- Supplementary Material/code/fairseq/tasks/__pycache__/translation_from_pretrained_xlm.cpython-38.pyc
- __MACOSX/Supplementary Material/code/fairseq/tasks/__pycache__/._translation_from_pretrained_xlm.cpython-38.pyc
- Supplementary Material/code/fairseq/tasks/__pycache__/translation.cpython-36.pyc
- __MACOSX/Supplementary Material/code/fairseq/tasks/__pycache__/._translation.cpython-36.pyc
- Supplementary Material/code/fairseq/tasks/__pycache__/denoising.cpython-36.pyc
- __MACOSX/Supplementary Material/code/fairseq/tasks/__pycache__/._denoising.cpython-36.pyc
- Supplementary Material/code/fairseq/tasks/__pycache__/language_modeling.cpython-38.pyc
- __MACOSX/Supplementary Material/code/fairseq/tasks/__pycache__/._language_modeling.cpython-38.pyc
- Supplementary Material/code/fairseq/tasks/__pycache__/masked_lm.cpython-36.pyc
- __MACOSX/Supplementary Material/code/fairseq/tasks/__pycache__/._masked_lm.cpython-36.pyc
- Supplementary Material/code/fairseq/tasks/__pycache__/legacy_masked_lm.cpython-38.pyc
- __MACOSX/Supplementary Material/code/fairseq/tasks/__pycache__/._legacy_masked_lm.cpython-38.pyc
- Supplementary Material/code/fairseq/tasks/__pycache__/sentence_prediction.cpython-38.pyc
- __MACOSX/Supplementary Material/code/fairseq/tasks/__pycache__/._sentence_prediction.cpython-38.pyc
- Supplementary Material/code/fairseq/tasks/__pycache__/translation_lev.cpython-36.pyc
- __MACOSX/Supplementary Material/code/fairseq/tasks/__pycache__/._translation_lev.cpython-36.pyc
- Supplementary Material/code/fairseq/tasks/__pycache__/multilingual_masked_lm.cpython-36.pyc
- __MACOSX/Supplementary Material/code/fairseq/tasks/__pycache__/._multilingual_masked_lm.cpython-36.pyc
- Supplementary Material/code/fairseq/tasks/__pycache__/sentence_ranking.cpython-38.pyc
- __MACOSX/Supplementary Material/code/fairseq/tasks/__pycache__/._sentence_ranking.cpython-38.pyc
- Supplementary Material/code/fairseq/tasks/__pycache__/cross_lingual_lm.cpython-36.pyc
- __MACOSX/Supplementary Material/code/fairseq/tasks/__pycache__/._cross_lingual_lm.cpython-36.pyc
- Supplementary Material/code/fairseq/tasks/__pycache__/multilingual_masked_lm.cpython-38.pyc
- __MACOSX/Supplementary Material/code/fairseq/tasks/__pycache__/._multilingual_masked_lm.cpython-38.pyc
- Supplementary Material/code/fairseq/tasks/__pycache__/translation_lev.cpython-38.pyc
- __MACOSX/Supplementary Material/code/fairseq/tasks/__pycache__/._translation_lev.cpython-38.pyc
- Supplementary Material/code/fairseq/tasks/__pycache__/cross_lingual_lm.cpython-38.pyc
- __MACOSX/Supplementary Material/code/fairseq/tasks/__pycache__/._cross_lingual_lm.cpython-38.pyc
- Supplementary Material/code/fairseq/tasks/__pycache__/sentence_ranking.cpython-36.pyc
- __MACOSX/Supplementary Material/code/fairseq/tasks/__pycache__/._sentence_ranking.cpython-36.pyc
- Supplementary Material/code/fairseq/tasks/__pycache__/masked_lm.cpython-38.pyc
- __MACOSX/Supplementary Material/code/fairseq/tasks/__pycache__/._masked_lm.cpython-38.pyc
- Supplementary Material/code/fairseq/tasks/__pycache__/language_modeling.cpython-36.pyc
- __MACOSX/Supplementary Material/code/fairseq/tasks/__pycache__/._language_modeling.cpython-36.pyc
- Supplementary Material/code/fairseq/tasks/__pycache__/sentence_prediction.cpython-36.pyc
- __MACOSX/Supplementary Material/code/fairseq/tasks/__pycache__/._sentence_prediction.cpython-36.pyc
- Supplementary Material/code/fairseq/tasks/__pycache__/legacy_masked_lm.cpython-36.pyc
- __MACOSX/Supplementary Material/code/fairseq/tasks/__pycache__/._legacy_masked_lm.cpython-36.pyc
- Supplementary Material/code/fairseq/tasks/__pycache__/multilingual_translation.cpython-38.pyc
- __MACOSX/Supplementary Material/code/fairseq/tasks/__pycache__/._multilingual_translation.cpython-38.pyc
- Supplementary Material/code/fairseq/tasks/__pycache__/translation_moe.cpython-38.pyc
- __MACOSX/Supplementary Material/code/fairseq/tasks/__pycache__/._translation_moe.cpython-38.pyc
- Supplementary Material/code/fairseq/tasks/__pycache__/fairseq_task.cpython-38.pyc
- __MACOSX/Supplementary Material/code/fairseq/tasks/__pycache__/._fairseq_task.cpython-38.pyc
- Supplementary Material/code/fairseq/tasks/__pycache__/denoising.cpython-38.pyc
- __MACOSX/Supplementary Material/code/fairseq/tasks/__pycache__/._denoising.cpython-38.pyc
- Supplementary Material/code/fairseq/tasks/__pycache__/translation.cpython-38.pyc
- __MACOSX/Supplementary Material/code/fairseq/tasks/__pycache__/._translation.cpython-38.pyc
- Supplementary Material/code/fairseq/tasks/__pycache__/translation_from_pretrained_xlm.cpython-36.pyc
- __MACOSX/Supplementary Material/code/fairseq/tasks/__pycache__/._translation_from_pretrained_xlm.cpython-36.pyc
- Supplementary Material/code/fairseq/tasks/__pycache__/__init__.cpython-36.pyc
- __MACOSX/Supplementary Material/code/fairseq/tasks/__pycache__/.___init__.cpython-36.pyc
- Supplementary Material/code/fairseq/tasks/__pycache__/semisupervised_translation.cpython-36.pyc
- __MACOSX/Supplementary Material/code/fairseq/tasks/__pycache__/._semisupervised_translation.cpython-36.pyc
- Supplementary Material/code/fairseq/tasks/__pycache__/audio_pretraining.cpython-36.pyc
- __MACOSX/Supplementary Material/code/fairseq/tasks/__pycache__/._audio_pretraining.cpython-36.pyc
- __MACOSX/Supplementary Material/code/fairseq/tasks/.___pycache__
- Supplementary Material/code/fairseq/tasks/audio_pretraining.py
- __MACOSX/Supplementary Material/code/fairseq/tasks/._audio_pretraining.py
- Supplementary Material/code/fairseq/tasks/translation.py
- __MACOSX/Supplementary Material/code/fairseq/tasks/._translation.py
- Supplementary Material/code/fairseq/tasks/semisupervised_translation.py
- __MACOSX/Supplementary Material/code/fairseq/tasks/._semisupervised_translation.py
- Supplementary Material/code/fairseq/tasks/sentence_prediction.py
- __MACOSX/Supplementary Material/code/fairseq/tasks/._sentence_prediction.py
- Supplementary Material/code/fairseq/tasks/translation_moe.py
- __MACOSX/Supplementary Material/code/fairseq/tasks/._translation_moe.py
- Supplementary Material/code/fairseq/tasks/cross_lingual_lm.py
- __MACOSX/Supplementary Material/code/fairseq/tasks/._cross_lingual_lm.py
- Supplementary Material/code/fairseq/tasks/translation_from_pretrained_xlm.py
- __MACOSX/Supplementary Material/code/fairseq/tasks/._translation_from_pretrained_xlm.py
- Supplementary Material/code/fairseq/tasks/masked_lm.py
- __MACOSX/Supplementary Material/code/fairseq/tasks/._masked_lm.py
- Supplementary Material/code/fairseq/tasks/sentence_ranking.py
- __MACOSX/Supplementary Material/code/fairseq/tasks/._sentence_ranking.py
- Supplementary Material/code/fairseq/tasks/multilingual_masked_lm.py
- __MACOSX/Supplementary Material/code/fairseq/tasks/._multilingual_masked_lm.py
- __MACOSX/Supplementary Material/code/fairseq/._tasks
- Supplementary Material/code/fairseq/iterative_refinement_generator.py
- __MACOSX/Supplementary Material/code/fairseq/._iterative_refinement_generator.py
- Supplementary Material/code/fairseq/meters.py
- __MACOSX/Supplementary Material/code/fairseq/._meters.py
- Supplementary Material/code/fairseq/libnat.cpython-36m-x86_64-linux-gnu.so
- __MACOSX/Supplementary Material/code/fairseq/._libnat.cpython-36m-x86_64-linux-gnu.so
- Supplementary Material/code/fairseq/registry.py
- __MACOSX/Supplementary Material/code/fairseq/._registry.py
- Supplementary Material/code/fairseq/clib/
- Supplementary Material/code/fairseq/clib/libnat_cuda/
- Supplementary Material/code/fairseq/clib/libnat_cuda/binding.cpp
- __MACOSX/Supplementary Material/code/fairseq/clib/
- __MACOSX/Supplementary Material/code/fairseq/clib/libnat_cuda/
- __MACOSX/Supplementary Material/code/fairseq/clib/libnat_cuda/._binding.cpp
- Supplementary Material/code/fairseq/clib/libnat_cuda/edit_dist.h
- __MACOSX/Supplementary Material/code/fairseq/clib/libnat_cuda/._edit_dist.h
- Supplementary Material/code/fairseq/clib/libnat_cuda/edit_dist.cu
- __MACOSX/Supplementary Material/code/fairseq/clib/libnat_cuda/._edit_dist.cu
- __MACOSX/Supplementary Material/code/fairseq/clib/._libnat_cuda
- Supplementary Material/code/fairseq/clib/libnat/
- Supplementary Material/code/fairseq/clib/libnat/edit_dist.cpp
- __MACOSX/Supplementary Material/code/fairseq/clib/libnat/
- __MACOSX/Supplementary Material/code/fairseq/clib/libnat/._edit_dist.cpp
- __MACOSX/Supplementary Material/code/fairseq/clib/._libnat
- Supplementary Material/code/fairseq/clib/libbleu/
- Supplementary Material/code/fairseq/clib/libbleu/module.cpp
- __MACOSX/Supplementary Material/code/fairseq/clib/libbleu/
- __MACOSX/Supplementary Material/code/fairseq/clib/libbleu/._module.cpp
- Supplementary Material/code/fairseq/clib/libbleu/libbleu.cpp
- __MACOSX/Supplementary Material/code/fairseq/clib/libbleu/._libbleu.cpp
- __MACOSX/Supplementary Material/code/fairseq/clib/._libbleu
- __MACOSX/Supplementary Material/code/fairseq/._clib
- Supplementary Material/code/fairseq/libnat_cuda.cpython-36m-x86_64-linux-gnu.so
- __MACOSX/Supplementary Material/code/fairseq/._libnat_cuda.cpython-36m-x86_64-linux-gnu.so
- Supplementary Material/code/fairseq/bleu.py
- __MACOSX/Supplementary Material/code/fairseq/._bleu.py
- Supplementary Material/code/fairseq/optim/
- Supplementary Material/code/fairseq/optim/nag.py
- __MACOSX/Supplementary Material/code/fairseq/optim/
- __MACOSX/Supplementary Material/code/fairseq/optim/._nag.py
- Supplementary Material/code/fairseq/optim/fused_adam.py
- __MACOSX/Supplementary Material/code/fairseq/optim/._fused_adam.py
- Supplementary Material/code/fairseq/optim/bmuf.py
- __MACOSX/Supplementary Material/code/fairseq/optim/._bmuf.py
- Supplementary Material/code/fairseq/optim/lr_scheduler/
- Supplementary Material/code/fairseq/optim/lr_scheduler/fixed_schedule.py
- __MACOSX/Supplementary Material/code/fairseq/optim/lr_scheduler/
- __MACOSX/Supplementary Material/code/fairseq/optim/lr_scheduler/._fixed_schedule.py
- Supplementary Material/code/fairseq/optim/lr_scheduler/reduce_lr_on_plateau.py
- __MACOSX/Supplementary Material/code/fairseq/optim/lr_scheduler/._reduce_lr_on_plateau.py
- Supplementary Material/code/fairseq/optim/lr_scheduler/__init__.py
- __MACOSX/Supplementary Material/code/fairseq/optim/lr_scheduler/.___init__.py
- Supplementary Material/code/fairseq/optim/lr_scheduler/__pycache__/
- Supplementary Material/code/fairseq/optim/lr_scheduler/__pycache__/inverse_square_root_schedule.cpython-38.pyc
- __MACOSX/Supplementary Material/code/fairseq/optim/lr_scheduler/__pycache__/
- __MACOSX/Supplementary Material/code/fairseq/optim/lr_scheduler/__pycache__/._inverse_square_root_schedule.cpython-38.pyc
- Supplementary Material/code/fairseq/optim/lr_scheduler/__pycache__/__init__.cpython-38.pyc
- __MACOSX/Supplementary Material/code/fairseq/optim/lr_scheduler/__pycache__/.___init__.cpython-38.pyc
- Supplementary Material/code/fairseq/optim/lr_scheduler/__pycache__/cosine_lr_scheduler.cpython-38.pyc
- __MACOSX/Supplementary Material/code/fairseq/optim/lr_scheduler/__pycache__/._cosine_lr_scheduler.cpython-38.pyc
- Supplementary Material/code/fairseq/optim/lr_scheduler/__pycache__/reduce_lr_on_plateau.cpython-38.pyc
- __MACOSX/Supplementary Material/code/fairseq/optim/lr_scheduler/__pycache__/._reduce_lr_on_plateau.cpython-38.pyc
- Supplementary Material/code/fairseq/optim/lr_scheduler/__pycache__/fixed_schedule.cpython-38.pyc
- __MACOSX/Supplementary Material/code/fairseq/optim/lr_scheduler/__pycache__/._fixed_schedule.cpython-38.pyc
- Supplementary Material/code/fairseq/optim/lr_scheduler/__pycache__/fairseq_lr_scheduler.cpython-36.pyc
- __MACOSX/Supplementary Material/code/fairseq/optim/lr_scheduler/__pycache__/._fairseq_lr_scheduler.cpython-36.pyc
- Supplementary Material/code/fairseq/optim/lr_scheduler/__pycache__/triangular_lr_scheduler.cpython-38.pyc
- __MACOSX/Supplementary Material/code/fairseq/optim/lr_scheduler/__pycache__/._triangular_lr_scheduler.cpython-38.pyc
- Supplementary Material/code/fairseq/optim/lr_scheduler/__pycache__/polynomial_decay_schedule.cpython-36.pyc
- __MACOSX/Supplementary Material/code/fairseq/optim/lr_scheduler/__pycache__/._polynomial_decay_schedule.cpython-36.pyc
- Supplementary Material/code/fairseq/optim/lr_scheduler/__pycache__/tri_stage_lr_scheduler.cpython-36.pyc
- __MACOSX/Supplementary Material/code/fairseq/optim/lr_scheduler/__pycache__/._tri_stage_lr_scheduler.cpython-36.pyc
- Supplementary Material/code/fairseq/optim/lr_scheduler/__pycache__/fairseq_lr_scheduler.cpython-38.pyc
- __MACOSX/Supplementary Material/code/fairseq/optim/lr_scheduler/__pycache__/._fairseq_lr_scheduler.cpython-38.pyc
- Supplementary Material/code/fairseq/optim/lr_scheduler/__pycache__/tri_stage_lr_scheduler.cpython-38.pyc
- __MACOSX/Supplementary Material/code/fairseq/optim/lr_scheduler/__pycache__/._tri_stage_lr_scheduler.cpython-38.pyc
- Supplementary Material/code/fairseq/optim/lr_scheduler/__pycache__/polynomial_decay_schedule.cpython-38.pyc
- __MACOSX/Supplementary Material/code/fairseq/optim/lr_scheduler/__pycache__/._polynomial_decay_schedule.cpython-38.pyc
- Supplementary Material/code/fairseq/optim/lr_scheduler/__pycache__/triangular_lr_scheduler.cpython-36.pyc
- __MACOSX/Supplementary Material/code/fairseq/optim/lr_scheduler/__pycache__/._triangular_lr_scheduler.cpython-36.pyc
- Supplementary Material/code/fairseq/optim/lr_scheduler/__pycache__/fixed_schedule.cpython-36.pyc
- __MACOSX/Supplementary Material/code/fairseq/optim/lr_scheduler/__pycache__/._fixed_schedule.cpython-36.pyc
[truncated: 1,567 more entries]
