# Supplementary material
Source: ML conference proceedings conference paper supplement (https://proceedings.neurips.cc/paper_files/paper/2022/hash/35f805e65c77652efa731edc10c8e3a6-Abstract.html)
Supplement: Supplementary file 1 [file 35f805e65c77652efa731edc10c8e3a6-Supplemental-Conference.zip › Supplementary Material/code/average.sh]

modelfile=$1
python scripts/average_checkpoints.py --inputs $modelfile/ \
 --num-update-checkpoints 5  --output $modelfile/average-model.pt
