# Supplementary material
Source: ML conference proceedings conference paper supplement (https://proceedings.neurips.cc/paper_files/paper/2022/hash/35f805e65c77652efa731edc10c8e3a6-Abstract.html)
Supplement: Supplementary file 1 [file 35f805e65c77652efa731edc10c8e3a6-Supplemental-Conference.zip › Supplementary Material/code/fairseq/__init__.py]

# Copyright (c) Facebook, Inc. and its affiliates.
#
# This source code is licensed under the MIT license found in the
# LICENSE file in the root directory of this source tree.

__all__ = ['pdb']
__version__ = '0.9.0'

import fairseq.criterions  # noqa
import fairseq.models  # noqa
import fairseq.modules  # noqa
import fairseq.optim  # noqa
import fairseq.optim.lr_scheduler  # noqa
import fairseq.pdb  # noqa
import fairseq.tasks  # noqa

import fairseq.benchmark  # noqa
