# Supplementary material
Source: ML conference proceedings conference paper supplement (https://proceedings.neurips.cc/paper_files/paper/2022/hash/35f805e65c77652efa731edc10c8e3a6-Abstract.html)
Supplement: Supplementary file 1 [file 35f805e65c77652efa731edc10c8e3a6-Supplemental-Conference.zip › Supplementary Material/code/fairseq/clib/libnat_cuda/edit_dist.h]

/**
 * Copyright 2017-present, Facebook, Inc.
 * All rights reserved.
 *
 * This source code is licensed under the license found in the
 * LICENSE file in the root directory of this source tree.
 */

#pragma once

#include <torch/extension.h>

torch::Tensor LevenshteinDistanceCuda(
        torch::Tensor source,
        torch::Tensor target,
        torch::Tensor source_length,
        torch::Tensor target_length);

torch::Tensor GenerateDeletionLabelCuda(
        torch::Tensor source,
        torch::Tensor operations);

std::pair<torch::Tensor, torch::Tensor> GenerateInsertionLabelCuda(
        torch::Tensor source,
        torch::Tensor operations);
