# Supplementary material
Source: ML conference proceedings conference paper supplement (https://proceedings.neurips.cc/paper_files/paper/2022/hash/35f805e65c77652efa731edc10c8e3a6-Abstract.html)
Supplement: Supplementary file 1 [file 35f805e65c77652efa731edc10c8e3a6-Supplemental-Conference.zip › Supplementary Material/code/fairseq/data/offset_tokens_dataset.py]

# Copyright (c) Facebook, Inc. and its affiliates.
#
# This source code is licensed under the MIT license found in the
# LICENSE file in the root directory of this source tree.

from . import BaseWrapperDataset


class OffsetTokensDataset(BaseWrapperDataset):

    def __init__(self, dataset, offset):
        super().__init__(dataset)
        self.offset = offset

    def __getitem__(self, idx):
        return self.dataset[idx] + self.offset
