# Supplementary material
Source: ML conference proceedings conference paper supplement (https://proceedings.neurips.cc/paper_files/paper/2022/hash/35f805e65c77652efa731edc10c8e3a6-Abstract.html)
Supplement: Supplementary file 1 [file 35f805e65c77652efa731edc10c8e3a6-Supplemental-Conference.zip › Supplementary Material/code/fairseq/data/truncate_dataset.py]

# Copyright (c) Facebook, Inc. and its affiliates.
#
# This source code is licensed under the MIT license found in the
# LICENSE file in the root directory of this source tree.

import numpy as np

from . import BaseWrapperDataset


class TruncateDataset(BaseWrapperDataset):

    def __init__(self, dataset, truncation_length):
        super().__init__(dataset)
        assert truncation_length is not None
        self.truncation_length = truncation_length
        self.dataset = dataset

    def __getitem__(self, index):
        item = self.dataset[index]
        item_len = item.size(0)
        if item_len > self.truncation_length:
            item = item[:self.truncation_length]
        return item

    @property
    def sizes(self):
        return np.minimum(self.dataset.sizes, self.truncation_length)

    def __len__(self):
        return len(self.dataset)
