# Supplementary material
Source: ML conference proceedings conference paper supplement (https://proceedings.neurips.cc/paper_files/paper/2022/hash/35f805e65c77652efa731edc10c8e3a6-Abstract.html)
Supplement: Supplementary file 1 [file 35f805e65c77652efa731edc10c8e3a6-Supplemental-Conference.zip › Supplementary Material/code/fairseq/incremental_decoding_utils.py]

# Copyright (c) Facebook, Inc. and its affiliates.
#
# This source code is licensed under the MIT license found in the
# LICENSE file in the root directory of this source tree.

from typing import Dict, Optional
import uuid

from torch import Tensor


class FairseqIncrementalState(object):

    def __init__(self, *args, **kwargs):
        super().__init__(*args, **kwargs)
        self.init_incremental_state()

    def init_incremental_state(self):
        self._incremental_state_id = str(uuid.uuid4())

    def _get_full_incremental_state_key(self, key: str) -> str:
        return "{}.{}".format(self._incremental_state_id, key)

    def get_incremental_state(
        self,
        incremental_state: Optional[Dict[str, Dict[str, Optional[Tensor]]]],
        key: str,
    ) -> Optional[Dict[str, Optional[Tensor]]]:
        """Helper for getting incremental state for an nn.Module."""
        full_key = self._get_full_incremental_state_key(key)
        if incremental_state is None or full_key not in incremental_state:
            return None
        return incremental_state[full_key]

    def set_incremental_state(
        self,
        incremental_state: Optional[Dict[str, Dict[str, Optional[Tensor]]]],
        key: str,
        value: Dict[str, Optional[Tensor]],
    ) -> Optional[Dict[str, Dict[str, Optional[Tensor]]]]:
        """Helper for setting incremental state for an nn.Module."""
        if incremental_state is not None:
            full_key = self._get_full_incremental_state_key(key)
            incremental_state[full_key] = value
        return incremental_state


def with_incremental_state(cls):
    cls.__bases__ = (FairseqIncrementalState,) + tuple(b for b in cls.__bases__ if b != FairseqIncrementalState)
    return cls
