# Supplementary material
Source: ML conference proceedings conference paper supplement (https://proceedings.neurips.cc/paper_files/paper/2022/hash/35f805e65c77652efa731edc10c8e3a6-Abstract.html)
Supplement: Supplementary file 1 [file 35f805e65c77652efa731edc10c8e3a6-Supplemental-Conference.zip › Supplementary Material/code/fairseq/iterative_refinement_generator.py]

# Copyright (c) Facebook, Inc. and its affiliates.
#
# This source code is licensed under the MIT license found in the
# LICENSE file in the root directory of this source tree.

from collections import namedtuple

import torch
import numpy as np

from fairseq import utils
from ctcdecode import CTCBeamDecoder


DecoderOut = namedtuple('IterativeRefinementDecoderOut', [
    'output_tokens',
    'output_scores',
    'attn',
    'step',
    'max_step',
    'history'
])


class IterativeRefinementGenerator(object):
    def __init__(
        self,
        args,
        tgt_dict,
        models=None,
        eos_penalty=0.0,
        max_iter=10,
        max_ratio=2,
        beam_size=1,
        decoding_format=None,
        retain_dropout=False,
        adaptive=True,
        retain_history=False,
        reranking=False,
    ):
        """
        Generates translations based on iterative refinement.

        Args:
            tgt_dict: target dictionary
            eos_penalty: if > 0.0, it penalized early-stopping in decoding
            max_iter: maximum number of refinement iterations
            max_ratio: generate sequences of maximum length ax, where x is the source length
            decoding_format: decoding mode in {'unigram', 'ensemble', 'vote', 'dp', 'bs'}
            retain_dropout: retaining dropout in the inference
            adaptive: decoding with early stop
        """
        self.bos = tgt_dict.bos()
        self.pad = tgt_dict.pad()
        self.unk = tgt_dict.unk()
        self.eos = tgt_dict.eos()
        self.vocab_size = len(tgt_dict)
        self.eos_penalty = eos_penalty
        self.max_iter = max_iter
        self.max_ratio = max_ratio
        self.beam_size = beam_size
        self.reranking = reranking
        self.decoding_format = decoding_format
        self.retain_dropout = retain_dropout
        self.retain_history = retain_history
        self.adaptive = adaptive
        self.models = models
        self.use_beamlm = args.use_beamlm
        if self.use_beamlm:
            labels=[]
            for i in range(len(tgt_dict)):
                labels.append(tgt_dict[i])
            self.beam_decoder = CTCBeamDecoder(
                labels,
                model_path=args.beamlm_path,
                alpha=args.alpha,
                beta=args.beta,
                cutoff_top_n=10,
                cutoff_prob=1.0,
                beam_width=20,
                num_processes=40,
                blank_id=4,
                log_probs_input=True
            )

    def generate_batched_itr(
        self,
        data_itr,
        maxlen_a=None,
        maxlen_b=None,
        cuda=False,
        timer=None,
        prefix_size=0,
    ):
        """Iterate over a batched dataset and yield individual translations.

        Args:
            maxlen_a/b: generate sequences of maximum length ax + b,
                where x is the source sentence length.
            cuda: use GPU for generation
            timer: StopwatchMeter for timing generations.
        """

        for sample in data_itr:
            if "net_input" not in sample:
                continue
            if timer is not None:
                timer.start()
            with torch.no_grad():
                hypos = self.generate(
                    self.models,
                    sample,
                    prefix_tokens=sample["target"][:, :prefix_size]
                    if prefix_size > 0
                    else None,
                )
            if timer is not None:
                timer.stop(sample["ntokens"])
            for i, id in enumerate(sample["id"]):
                # remove padding
                src = utils.strip_pad(sample["net_input"]["src_tokens"][i, :], self.pad)
                ref = utils.strip_pad(sample["target"][i, :], self.pad)
                yield id, src, ref, hypos[i]


    @torch.no_grad()
    def generate(self, models, sample, prefix_tokens=None):

        # TODO: iterative refinement generator does not support ensemble for now.
        if not self.retain_dropout:
            for model in models:
                model.eval()

        model, reranker = models[0], None
        if self.reranking:
            assert len(models) > 1, "Assuming the last checkpoint is the reranker"
            assert self.beam_size > 1, "Reranking requires multiple translation for each example"

            reranker = models[-1]
            models = models[:-1]

        if len(models) > 1 and hasattr(model, 'enable_ensemble'):
            assert model.allow_ensemble, "{} does not support ensembling".format(model.__class__.__name__)
            model.enable_ensemble(models)

        # TODO: better encoder inputs?
        src_tokens = sample["net_input"]["src_tokens"]
        src_lengths = sample["net_input"]["src_lengths"]
        bsz, src_len = src_tokens.size()

        # initialize
        encoder_out = model.forward_encoder([src_tokens, src_lengths])
        prev_decoder_out = model.initialize_output_tokens(encoder_out, src_tokens)

        if self.beam_size > 1:
            assert model.allow_length_beam, \
                "{} does not support decoding with length beam.".format(model.__class__.__name__)

            # regenerate data based on length-beam
            length_beam_order = utils.new_arange(src_tokens, self.beam_size, bsz).t().reshape(-1)
            encoder_out = model.encoder.reorder_encoder_out(encoder_out, length_beam_order)
            prev_decoder_out = model.regenerate_length_beam(prev_decoder_out, self.beam_size)
            bsz = bsz * self.beam_size

        sent_idxs = torch.arange(bsz)
        prev_output_tokens = prev_decoder_out.output_tokens.clone()

        if self.retain_history:
            prev_decoder_out = prev_decoder_out._replace(history=[prev_output_tokens])

        finalized = [[] for _ in range(bsz)]

        def is_a_loop(x, y, s, a):
            b, l_x, l_y = x.size(0), x.size(1), y.size(1)
            if l_x > l_y:
                y = torch.cat([y, x.new_zeros(b, l_x - l_y).fill_(self.pad)], 1)
                s = torch.cat([s, s.new_zeros(b, l_x - l_y)], 1)
                if a is not None:
                    a = torch.cat([a, a.new_zeros(b, l_x - l_y, a.size(2))], 1)
            elif l_x < l_y:
                x = torch.cat([x, y.new_zeros(b, l_y - l_x).fill_(self.pad)], 1)
            return (x == y).all(1), y, s, a

        def finalized_hypos(step, prev_out_token, prev_out_score, prev_out_attn):
            cutoff = prev_out_token.ne(self.pad)
            tokens = prev_out_token[cutoff]
            if prev_out_score is None:
                scores, score = None, None
            else:
                scores = prev_out_score[cutoff]
                score = scores.mean()

            if prev_out_attn is None:
                hypo_attn, alignment = None, None
            else:
                hypo_attn = prev_out_attn[cutoff]
                alignment = hypo_attn.max(dim=1)[1]
            return {
                "steps": step,
                "tokens": tokens,
                "positional_scores": scores,
                "score": score,
                "hypo_attn": hypo_attn,
                "alignment": alignment,
            }

        for step in range(self.max_iter + 1):

            decoder_options = {
                "eos_penalty": self.eos_penalty,
                "max_ratio": self.max_ratio,
                "decoding_format": self.decoding_format,
            }
            prev_decoder_out = prev_decoder_out._replace(
                step=step,
                max_step=self.max_iter + 1,
            )

            log_probs, decoder_out = model.forward_decoder(
                prev_decoder_out, encoder_out, **decoder_options
            )

            if self.use_beamlm:
                log_probs, idx = torch.topk(log_probs, 10, dim = -1)
                beam_results, beam_scores, timesteps, out_lens = self.beam_decoder.decode(log_probs,idx)
                beam_outs = []
                for i in range(src_tokens.size(0)):
                    beam_outs.append(beam_results[i][0][:out_lens[i][0]])

            if self.adaptive:
                # terminate if there is a loop
                terminated, out_tokens, out_scores, out_attn = is_a_loop(
                    prev_output_tokens, decoder_out.output_tokens, decoder_out.output_scores, decoder_out.attn
                )
                decoder_out = decoder_out._replace(
                    output_tokens=out_tokens,
                    output_scores=out_scores,
                    attn=out_attn,
                )

            else:
                terminated = decoder_out.output_tokens.new_zeros(decoder_out.output_tokens.size(0)).bool()

            if step == self.max_iter:  # reach last iteration, terminate
                terminated.fill_(1)

            # collect finalized sentences
            finalized_idxs = sent_idxs[terminated]
            finalized_tokens = decoder_out.output_tokens[terminated]
            finalized_scores = decoder_out.output_scores[terminated]
            finalized_attn = (
                None if (decoder_out.attn is None or decoder_out.attn.size(0) == 0) else decoder_out.attn[terminated]
            )

            if self.retain_history:
                finalized_history_tokens = [h[terminated] for h in decoder_out.history]

            for i in range(finalized_idxs.size(0)):
                finalized[finalized_idxs[i]] = [
                    finalized_hypos(
                        step,
                        finalized_tokens[i],
                        finalized_scores[i],
                        None if finalized_attn is None else finalized_attn[i],
                    )
                ]

                if self.retain_history:
                    finalized[finalized_idxs[i]][0]['history'] = []
                    for j in range(len(finalized_history_tokens)):
                        finalized[finalized_idxs[i]][0]['history'].append(
                            finalized_hypos(
                                step,
                                finalized_history_tokens[j][i],
                                None, None
                            )
                        )

            # check if all terminated
            if terminated.sum() == terminated.size(0):
                break

            # for next step
            not_terminated = ~terminated
            prev_decoder_out = decoder_out._replace(
                output_tokens=decoder_out.output_tokens[not_terminated],
                output_scores=decoder_out.output_scores[not_terminated],
                attn=decoder_out.attn[not_terminated]
                if (decoder_out.attn is not None and decoder_out.attn.size(0) > 0)
                else None,
                history=[h[not_terminated] for h in decoder_out.history]
                if decoder_out.history is not None
                else None,
            )
            encoder_out = model.encoder.reorder_encoder_out(encoder_out, not_terminated.nonzero().squeeze())
            sent_idxs = sent_idxs[not_terminated]
            prev_output_tokens = prev_decoder_out.output_tokens.clone()

        if self.beam_size > 1:
            if reranker is not None:
                finalized = self.rerank(
                    reranker, finalized, [src_tokens, src_lengths], self.beam_size
                )

            # aggregate information from length beam
            finalized = [
                finalized[np.argmax(
                    [finalized[self.beam_size * i + j][0]['score'] for j in range(self.beam_size)]
                    ) + self.beam_size * i] for i in range(len(finalized) // self.beam_size)
                ]

        if self.use_beamlm:
            for i in range(src_tokens.size(0)):
                finalized[i][0]['tokens'] = beam_outs[i]
        return finalized

    def rerank(self, reranker, finalized, encoder_input, beam_size):

        def rebuild_batch(finalized):
            finalized_tokens = [f[0]['tokens'] for f in finalized]
            finalized_maxlen = max(f.size(0) for f in finalized_tokens)
            final_output_tokens = finalized_tokens[0].new_zeros(len(finalized_tokens), finalized_maxlen).fill_(self.pad)
            for i, f in enumerate(finalized_tokens):
                final_output_tokens[i, :f.size(0)] = f
            return final_output_tokens

        final_output_tokens = rebuild_batch(finalized)
        final_output_tokens[:, 0] = self.eos  # autoregressive model assumes starting with EOS

        reranker_encoder_out = reranker.encoder(*encoder_input)
        length_beam_order = utils.new_arange(
            final_output_tokens, beam_size, reranker_encoder_out.encoder_out.size(1)).t().reshape(-1)
        reranker_encoder_out = reranker.encoder.reorder_encoder_out(reranker_encoder_out, length_beam_order)
        reranking_scores = reranker.get_normalized_probs(
            reranker.decoder(final_output_tokens[:, :-1], reranker_encoder_out), True, None)
        reranking_scores = reranking_scores.gather(2, final_output_tokens[:, 1:, None])
        reranking_masks = final_output_tokens[:, 1:].ne(self.pad)
        reranking_scores = reranking_scores[:, :, 0].masked_fill_(~reranking_masks, 0).sum(1)
        reranking_scores = reranking_scores / reranking_masks.sum(1).type_as(reranking_scores)

        for i in range(len(finalized)):
            finalized[i][0]['score'] = reranking_scores[i]

        return finalized
