# Supplementary material
Source: ML conference proceedings conference paper supplement (https://proceedings.neurips.cc/paper_files/paper/2022/hash/35f805e65c77652efa731edc10c8e3a6-Abstract.html)
Supplement: Supplementary file 1 [file 35f805e65c77652efa731edc10c8e3a6-Supplemental-Conference.zip › Supplementary Material/code/fairseq/models/distributed_fairseq_model.py]

# Copyright (c) Facebook, Inc. and its affiliates.
#
# This source code is licensed under the MIT license found in the
# LICENSE file in the root directory of this source tree.

import inspect

import torch.nn as nn

from fairseq.legacy_distributed_data_parallel import LegacyDistributedDataParallel
from fairseq.models import BaseFairseqModel


def DistributedFairseqModel(args, model):
    """
    Wrap a *model* to support distributed data parallel training.

    This is similar to the built-in DistributedDataParallel, but allows
    additional configuration of the DistributedDataParallel class to
    use, and also provides easier access to the wrapped model by
    forwarding requests for missing attributes to the wrapped model.

    Args:
        args (argparse.Namespace): fairseq args
        model (BaseFairseqModel): model to wrap
    """
    # determine which DDP class to extend
    assert isinstance(model, nn.Module)
    if args.ddp_backend == 'c10d':
        ddp_class = nn.parallel.DistributedDataParallel
        init_kwargs = dict(
            module=model,
            device_ids=[args.device_id],
            output_device=args.device_id,
            broadcast_buffers=args.broadcast_buffers,
            bucket_cap_mb=args.bucket_cap_mb,
        )
        # Maintain backward compatibility
        if 'check_reduction' in inspect.getargspec(ddp_class)[0]:
            init_kwargs['check_reduction'] = True
        if 'find_unused_parameters' in inspect.getargspec(ddp_class)[0]:
            init_kwargs['find_unused_parameters'] = args.find_unused_parameters
    elif args.ddp_backend == 'no_c10d':
        ddp_class = LegacyDistributedDataParallel
        init_kwargs = dict(
            module=model,
            world_size=args.distributed_world_size,
            buffer_size=2**28,
        )
    else:
        raise ValueError('Unknown --ddp-backend: ' + args.ddp_backend)

    class _DistributedFairseqModel(ddp_class):
        """Extend DistributedDataParallel to check for missing
        attributes in the wrapped module."""

        def __init__(self, *args, **kwargs):
            super().__init__(*args, **kwargs)

        def __getattr__(self, name):
            wrapped_module = super().__getattr__('module')
            if hasattr(wrapped_module, name):
                return getattr(wrapped_module, name)
            return super().__getattr__(name)

    return _DistributedFairseqModel(**init_kwargs)
