# Supplementary material
Source: ML conference proceedings conference paper supplement (https://proceedings.neurips.cc/paper_files/paper/2022/hash/35f805e65c77652efa731edc10c8e3a6-Abstract.html)
Supplement: Supplementary file 1 [file 35f805e65c77652efa731edc10c8e3a6-Supplemental-Conference.zip › Supplementary Material/code/fairseq/models/fairseq_incremental_decoder.py]

# Copyright (c) Facebook, Inc. and its affiliates.
#
# This source code is licensed under the MIT license found in the
# LICENSE file in the root directory of this source tree.

from fairseq.models import FairseqDecoder
from fairseq.incremental_decoding_utils import with_incremental_state


@with_incremental_state
class FairseqIncrementalDecoder(FairseqDecoder):
    """Base class for incremental decoders.

    Incremental decoding is a special mode at inference time where the Model
    only receives a single timestep of input corresponding to the previous
    output token (for teacher forcing) and must produce the next output
    *incrementally*. Thus the model must cache any long-term state that is
    needed about the sequence, e.g., hidden states, convolutional states, etc.

    Compared to the standard :class:`FairseqDecoder` interface, the incremental
    decoder interface allows :func:`forward` functions to take an extra keyword
    argument (*incremental_state*) that can be used to cache state across
    time-steps.

    The :class:`FairseqIncrementalDecoder` interface also defines the
    :func:`reorder_incremental_state` method, which is used during beam search
    to select and reorder the incremental state based on the selection of beams.

    To learn more about how incremental decoding works, refer to `this blog
    <http://www.telesens.co/2019/04/21/understanding-incremental-decoding-in-fairseq/>`_.
    """

    def __init__(self, dictionary):
        super().__init__(dictionary)

    def forward(self, prev_output_tokens, encoder_out=None, incremental_state=None, **kwargs):
        """
        Args:
            prev_output_tokens (LongTensor): shifted output tokens of shape
                `(batch, tgt_len)`, for teacher forcing
            encoder_out (dict, optional): output from the encoder, used for
                encoder-side attention
            incremental_state (dict, optional): dictionary used for storing
                state during :ref:`Incremental decoding`

        Returns:
            tuple:
                - the decoder's output of shape `(batch, tgt_len, vocab)`
                - a dictionary with any model-specific outputs
        """
        raise NotImplementedError

    def extract_features(self, prev_output_tokens, encoder_out=None, incremental_state=None, **kwargs):
        """
        Returns:
            tuple:
                - the decoder's features of shape `(batch, tgt_len, embed_dim)`
                - a dictionary with any model-specific outputs
        """
        raise NotImplementedError

    def reorder_incremental_state(self, incremental_state, new_order):
        """Reorder incremental state.

        This should be called when the order of the input has changed from the
        previous time step. A typical use case is beam search, where the input
        order changes between time steps based on the selection of beams.
        """
        seen = set()
        for module in self.modules():
            if (
                module != self
                and hasattr(module, 'reorder_incremental_state')
                and module not in seen
            ):
                seen.add(module)
                result = module.reorder_incremental_state(incremental_state, new_order)
                if result is not None:
                    incremental_state = result

    def set_beam_size(self, beam_size):
        """Sets the beam size in the decoder and all children."""
        if getattr(self, '_beam_size', -1) != beam_size:
            seen = set()

            def apply_set_beam_size(module):
                if module != self and hasattr(module, 'set_beam_size') \
                        and module not in seen:
                    seen.add(module)
                    module.set_beam_size(beam_size)

            self.apply(apply_set_beam_size)
            self._beam_size = beam_size
