# Supplementary material
Source: ML conference proceedings conference paper supplement (https://proceedings.neurips.cc/paper_files/paper/2022/hash/35f805e65c77652efa731edc10c8e3a6-Abstract.html)
Supplement: Supplementary file 1 [file 35f805e65c77652efa731edc10c8e3a6-Supplemental-Conference.zip › Supplementary Material/code/fairseq/models/fconv_lm.py]

# Copyright (c) Facebook, Inc. and its affiliates.
#
# This source code is licensed under the MIT license found in the
# LICENSE file in the root directory of this source tree.

from fairseq import options
from fairseq.models import (
    FairseqLanguageModel,
    register_model,
    register_model_architecture,
)
from fairseq.models.fconv import FConvDecoder


@register_model('fconv_lm')
class FConvLanguageModel(FairseqLanguageModel):
    def __init__(self, decoder):
        super().__init__(decoder)

    @staticmethod
    def add_args(parser):
        """Add model-specific arguments to the parser."""
        parser.add_argument('--dropout', type=float, metavar='D',
                            help='dropout probability')
        parser.add_argument('--decoder-embed-dim', type=int, metavar='N',
                            help='decoder embedding dimension')
        parser.add_argument('--decoder-layers', type=str, metavar='EXPR',
                            help='decoder layers [(dim, kernel_size), ...]')
        parser.add_argument('--decoder-out-embed-dim', type=int, metavar='N',
                            help='decoder output embedding dimension')
        parser.add_argument('--adaptive-softmax-cutoff', metavar='EXPR',
                            help='comma separated list of adaptive softmax cutoff points. '
                                 'Must be used with adaptive_loss criterion')
        parser.add_argument('--adaptive-softmax-dropout', type=float, metavar='D',
                            help='sets adaptive softmax dropout for the tail projections')
        parser.add_argument('--decoder-attention', type=str, metavar='EXPR',
                            help='decoder attention [True, ...]')

    @classmethod
    def build_model(cls, args, task):
        """Build a new model instance."""
        # make sure all arguments are present in older models
        base_lm_architecture(args)

        if hasattr(args, 'max_target_positions') and not hasattr(args, 'tokens_per_sample'):
            args.tokens_per_sample = args.max_target_positions

        decoder = FConvDecoder(
            dictionary=task.target_dictionary,
            embed_dim=args.decoder_embed_dim,
            convolutions=eval(args.decoder_layers),
            out_embed_dim=args.decoder_embed_dim,
            attention=eval(args.decoder_attention),
            dropout=args.dropout,
            max_positions=args.tokens_per_sample,
            share_embed=False,
            positional_embeddings=False,
            adaptive_softmax_cutoff=(
                options.eval_str_list(args.adaptive_softmax_cutoff, type=int)
                if args.criterion == 'adaptive_loss' else None
            ),
            adaptive_softmax_dropout=args.adaptive_softmax_dropout,
        )
        return FConvLanguageModel(decoder)


@register_model_architecture('fconv_lm', 'fconv_lm')
def base_lm_architecture(args):
    args.dropout = getattr(args, 'dropout', 0.1)
    args.decoder_embed_dim = getattr(args, 'decoder_embed_dim', 128)
    args.decoder_layers = getattr(args, 'decoder_layers', '[(1268, 4)] * 13')
    args.decoder_attention = getattr(args, 'decoder_attention', 'False')
    args.adaptive_softmax_cutoff = getattr(args, 'adaptive_softmax_cutoff', None)
    args.adaptive_softmax_dropout = getattr(args, 'adaptive_softmax_dropout', 0)


@register_model_architecture('fconv_lm', 'fconv_lm_dauphin_wikitext103')
def fconv_lm_dauphin_wikitext103(args):
    layers = '[(850, 6)] * 3'
    layers += ' + [(850, 1)] * 1'
    layers += ' + [(850, 5)] * 4'
    layers += ' + [(850, 1)] * 1'
    layers += ' + [(850, 4)] * 3'
    layers += ' + [(1024, 4)] * 1'
    layers += ' + [(2048, 4)] * 1'
    args.decoder_embed_dim = getattr(args, 'decoder_embed_dim', 280)
    args.decoder_layers = getattr(args, 'decoder_layers', layers)
    args.decoder_attention = getattr(args, 'decoder_attention', 'False')
    args.adaptive_softmax_cutoff = getattr(args, 'adaptive_softmax_cutoff', '10000,20000,200000')
    base_lm_architecture(args)


@register_model_architecture('fconv_lm', 'fconv_lm_dauphin_gbw')
def fconv_lm_dauphin_gbw(args):
    layers = '[(512, 5)]'
    layers += ' + [(128, 1, 0), (128, 5, 0), (512, 1, 3)] * 3'
    layers += ' + [(512, 1, 0), (512, 5, 0), (1024, 1, 3)] * 3'
    layers += ' + [(1024, 1, 0), (1024, 5, 0), (2048, 1, 3)] * 6'
    layers += ' + [(1024, 1, 0), (1024, 5, 0), (4096, 1, 3)]'
    args.decoder_embed_dim = getattr(args, 'decoder_embed_dim', 128)
    args.decoder_layers = getattr(args, 'decoder_layers', layers)
    args.decoder_attention = getattr(args, 'decoder_attention', 'False')
    args.adaptive_softmax_cutoff = getattr(args, 'adaptive_softmax_cutoff', '10000,50000,200000')
    base_lm_architecture(args)
