# Supplementary material
Source: ML conference proceedings conference paper supplement (https://proceedings.neurips.cc/paper_files/paper/2022/hash/35f805e65c77652efa731edc10c8e3a6-Abstract.html)
Supplement: Supplementary file 1 [file 35f805e65c77652efa731edc10c8e3a6-Supplemental-Conference.zip › Supplementary Material/code/fairseq/models/lightconv_lm.py]

# Copyright (c) Facebook, Inc. and its affiliates.
#
# This source code is licensed under the MIT license found in the
# LICENSE file in the root directory of this source tree.

from fairseq import options
from fairseq.models import (
    FairseqLanguageModel,
    register_model,
    register_model_architecture,
)
from fairseq.models.lightconv import (
    Embedding,
    LightConvDecoder,
)
from fairseq.modules import (
    AdaptiveInput,
    CharacterTokenEmbedder,
)


@register_model('lightconv_lm')
class LightConvLanguageModel(FairseqLanguageModel):
    def __init__(self, decoder):
        super().__init__(decoder)

    @staticmethod
    def add_args(parser):
        """Add model-specific arguments to the parser."""
        parser.add_argument('--dropout', default=0.1, type=float, metavar='D',
                            help='dropout probability')
        parser.add_argument('--attention-dropout', default=0., type=float, metavar='D',
                            help='dropout probability for attention weights')
        parser.add_argument('--relu-dropout', default=0., type=float, metavar='D',
                            help='dropout probability after ReLU in FFN')
        parser.add_argument('--input-dropout', type=float, metavar='D',
                            help='dropout probability of the inputs')
        parser.add_argument('--decoder-embed-dim', type=int, metavar='N',
                            help='decoder embedding dimension')
        parser.add_argument('--decoder-output-dim', type=int, metavar='N',
                            help='decoder output dimension')
        parser.add_argument('--decoder-input-dim', type=int, metavar='N',
                            help='decoder input dimension')
        parser.add_argument('--decoder-ffn-embed-dim', type=int, metavar='N',
                            help='decoder embedding dimension for FFN')
        parser.add_argument('--decoder-layers', type=int, metavar='N',
                            help='num decoder layers')
        parser.add_argument('--decoder-attention-heads', type=int, metavar='N',
                            help='num decoder attention heads or LightConv/DynamicConv heads')
        parser.add_argument('--decoder-normalize-before', default=False, action='store_true',
                            help='apply layernorm before each decoder block')
        parser.add_argument('--adaptive-softmax-cutoff', metavar='EXPR',
                            help='comma separated list of adaptive softmax cutoff points. '
                                 'Must be used with adaptive_loss criterion')
        parser.add_argument('--adaptive-softmax-dropout', type=float, metavar='D',
                            help='sets adaptive softmax dropout for the tail projections')
        parser.add_argument('--adaptive-softmax-factor', type=float, metavar='N',
                            help='adaptive input factor')
        parser.add_argument('--no-token-positional-embeddings', default=False, action='store_true',
                            help='if set, disables positional embeddings (outside self attention)')
        parser.add_argument('--share-decoder-input-output-embed', default=False, action='store_true',
                            help='share decoder input and output embeddings')
        parser.add_argument('--character-embeddings', default=False, action='store_true',
                            help='if set, uses character embedding convolutions to produce token embeddings')
        parser.add_argument('--character-filters', type=str, metavar='LIST',
                            default='[(1, 64), (2, 128), (3, 192), (4, 256), (5, 256), (6, 256), (7, 256)]',
                            help='size of character embeddings')
        parser.add_argument('--character-embedding-dim', type=int, metavar='N', default=4,
                            help='size of character embeddings')
        parser.add_argument('--char-embedder-highway-layers', type=int, metavar='N', default=2,
                            help='number of highway layers for character token embeddder')
        parser.add_argument('--adaptive-input', default=False, action='store_true',
                            help='if set, uses adaptive input')
        parser.add_argument('--adaptive-input-factor', type=float, metavar='N',
                            help='adaptive input factor')
        parser.add_argument('--adaptive-input-cutoff', metavar='EXPR',
                            help='comma separated list of adaptive input cutoff points.')
        parser.add_argument('--tie-adaptive-weights', action='store_true',
                            help='if set, ties the weights of adaptive softmax and adaptive input')
        parser.add_argument('--tie-adaptive-proj', action='store_true',
                            help='if set, ties the projection weights of adaptive softmax and adaptive input')
        parser.add_argument('--decoder-learned-pos', action='store_true',
                            help='use learned positional embeddings in the decoder')

        """LightConv and DynamicConv arguments"""
        parser.add_argument('--decoder-kernel-size-list', type=lambda x: options.eval_str_list(x, int),
                            help='list of kernel size (default: "[3,7,15,31,31,31]")')
        parser.add_argument('--decoder-glu', type=options.eval_bool,
                            help='glu after in proj')
        parser.add_argument('--decoder-conv-type', default='dynamic', type=str,
                            choices=['dynamic', 'lightweight'],
                            help='type of convolution')
        parser.add_argument('--weight-softmax', default=True, type=options.eval_bool)
        parser.add_argument('--weight-dropout', type=float, metavar='D',
                            help='dropout probability for conv weights')

    @classmethod
    def build_model(cls, args, task):
        """Build a new model instance."""

        # make sure all arguments are present in older models
        base_lm_architecture(args)

        if getattr(args, 'max_source_positions', None) is None:
            args.max_source_positions = args.tokens_per_sample
        if getattr(args, 'max_target_positions', None) is None:
            args.max_target_positions = args.tokens_per_sample

        if args.character_embeddings:
            embed_tokens = CharacterTokenEmbedder(task.dictionary, eval(args.character_filters),
                                                  args.character_embedding_dim,
                                                  args.decoder_embed_dim,
                                                  args.char_embedder_highway_layers,
                                                  )
        elif args.adaptive_input:
            embed_tokens = AdaptiveInput(len(task.dictionary), task.dictionary.pad(), args.decoder_input_dim,
                                         args.adaptive_input_factor, args.decoder_embed_dim,
                                         options.eval_str_list(args.adaptive_input_cutoff, type=int))
        else:
            embed_tokens = Embedding(len(task.dictionary), args.decoder_input_dim, task.dictionary.pad())

        if args.tie_adaptive_weights:
            assert args.adaptive_input
            assert args.adaptive_input_factor == args.adaptive_softmax_factor
            assert args.adaptive_softmax_cutoff == args.adaptive_input_cutoff, '{} != {}'.format(
                args.adaptive_softmax_cutoff, args.adaptive_input_cutoff)
            assert args.decoder_input_dim == args.decoder_output_dim

        decoder = LightConvDecoder(args, task.output_dictionary, embed_tokens, no_encoder_attn=True, final_norm=False)
        return LightConvLanguageModel(decoder)


@register_model_architecture('lightconv_lm', 'lightconv_lm')
def base_lm_architecture(args):
    args.decoder_embed_dim = getattr(args, 'decoder_embed_dim', 512)
    args.decoder_ffn_embed_dim = getattr(args, 'decoder_ffn_embed_dim', 2048)
    args.decoder_layers = getattr(args, 'decoder_layers', 6)
    args.decoder_attention_heads = getattr(args, 'decoder_attention_heads', 8)
    args.adaptive_softmax_cutoff = getattr(args, 'adaptive_softmax_cutoff', None)
    args.adaptive_softmax_dropout = getattr(args, 'adaptive_softmax_dropout', 0)
    args.adaptive_softmax_factor = getattr(args, 'adaptive_softmax_factor', 4)
    args.decoder_learned_pos = getattr(args, 'decoder_learned_pos', False)

    args.character_embeddings = getattr(args, 'character_embeddings', False)

    args.decoder_output_dim = getattr(args, 'decoder_output_dim', args.decoder_embed_dim)
    args.decoder_input_dim = getattr(args, 'decoder_input_dim', args.decoder_embed_dim)
    args.decoder_conv_dim = getattr(args, 'decoder_conv_dim', args.decoder_embed_dim)

    # The model training is not stable without this
    args.decoder_normalize_before = True

    args.adaptive_input = getattr(args, 'adaptive_input', False)
    args.adaptive_input_factor = getattr(args, 'adaptive_input_factor', 4)
    args.adaptive_input_cutoff = getattr(args, 'adaptive_input_cutoff', None)

    args.tie_adaptive_weights = getattr(args, 'tie_adaptive_weights', False)
    args.tie_adaptive_proj = getattr(args, 'tie_adaptive_proj', False)

    args.decoder_kernel_size_list = getattr(args, 'decoder_kernel_size_list', [3, 7, 15, 31, 31, 31])
    if len(args.decoder_kernel_size_list) == 1:
        args.decoder_kernel_size_list = args.decoder_kernel_size_list * args.decoder_layers
    assert len(args.decoder_kernel_size_list) == args.decoder_layers, "decoder_kernel_size_list doesn't match decoder_layers"
    args.decoder_glu = getattr(args, 'decoder_glu', True)
    args.input_dropout = getattr(args, 'input_dropout', 0.1)
    args.weight_dropout = getattr(args, 'weight_dropout', args.attention_dropout)


@register_model_architecture('lightconv_lm', 'lightconv_lm_gbw')
def lightconv_lm_gbw(args):
    args.decoder_embed_dim = getattr(args, 'decoder_embed_dim', 512)
    args.dropout = getattr(args, 'dropout', 0.1)
    args.attention_dropout = getattr(args, 'attention_dropout', 0.1)
    args.decoder_ffn_embed_dim = getattr(args, 'decoder_ffn_embed_dim', 4096)
    args.decoder_attention_heads = getattr(args, 'decoder_attention_heads', 16)
    base_lm_architecture(args)
