# Supplementary material
Source: ML conference proceedings conference paper supplement (https://proceedings.neurips.cc/paper_files/paper/2022/hash/35f805e65c77652efa731edc10c8e3a6-Abstract.html)
Supplement: Supplementary file 1 [file 35f805e65c77652efa731edc10c8e3a6-Supplemental-Conference.zip › Supplementary Material/code/fairseq/models/masked_lm.py]

# Copyright (c) Facebook, Inc. and its affiliates.
#
# This source code is licensed under the MIT license found in the
# LICENSE file in the root directory of this source tree.

import logging

import torch
import torch.nn as nn
import torch.nn.functional as F

from fairseq import utils
from fairseq.models import (
    BaseFairseqModel,
    FairseqEncoder,
    register_model,
    register_model_architecture,
)
from fairseq.modules import (
    LayerNorm,
    SinusoidalPositionalEmbedding,
    TransformerSentenceEncoder,
)
from fairseq.modules.transformer_sentence_encoder import init_bert_params


logger = logging.getLogger(__name__)


@register_model('masked_lm')
class MaskedLMModel(BaseFairseqModel):
    """
    Class for training a Masked Language Model. It also supports an
    additional sentence level prediction if the sent-loss argument is set.
    """
    def __init__(self, args, encoder):
        super().__init__()
        self.args = args
        self.encoder = encoder

        # if specified then apply bert initialization on the model. We need
        # to explictly call this to make sure that the output embeddings
        # and projection layers are also correctly initialized
        if getattr(args, 'apply_bert_init', False):
            self.apply(init_bert_params)

    @staticmethod
    def add_args(parser):
        """Add model-specific arguments to the parser."""
        # Arguments related to dropout
        parser.add_argument('--dropout', type=float, metavar='D',
                            help='dropout probability')
        parser.add_argument('--attention-dropout', type=float,
                            metavar='D', help='dropout probability for'
                            ' attention weights')
        parser.add_argument('--act-dropout', type=float,
                            metavar='D', help='dropout probability after'
                            ' activation in FFN')

        # Arguments related to hidden states and self-attention
        parser.add_argument('--encoder-ffn-embed-dim', type=int, metavar='N',
                            help='encoder embedding dimension for FFN')
        parser.add_argument('--encoder-layers', type=int, metavar='N',
                            help='num encoder layers')
        parser.add_argument('--encoder-attention-heads', type=int, metavar='N',
                            help='num encoder attention heads')
        parser.add_argument('--bias-kv', action='store_true',
                            help='if set, adding a learnable bias kv')
        parser.add_argument('--zero-attn', action='store_true',
                            help='if set, pads attn with zero')

        # Arguments related to input and output embeddings
        parser.add_argument('--encoder-embed-dim', type=int, metavar='N',
                            help='encoder embedding dimension')
        parser.add_argument('--share-encoder-input-output-embed',
                            action='store_true', help='share encoder input'
                            ' and output embeddings')
        parser.add_argument('--encoder-learned-pos', action='store_true',
                            help='use learned positional embeddings in the encoder')
        parser.add_argument('--no-token-positional-embeddings',
                            action='store_true',
                            help='if set, disables positional embeddings'
                            ' (outside self attention)')
        parser.add_argument('--num-segment', type=int, metavar='N',
                            help='num segment in the input')

        # Arguments related to sentence level prediction
        parser.add_argument('--sentence-class-num', type=int, metavar='N',
                            help='number of classes for sentence task')
        parser.add_argument('--sent-loss', action='store_true', help='if set,'
                            ' calculate sentence level predictions')

        # Arguments related to parameter initialization
        parser.add_argument('--apply-bert-init', action='store_true',
                            help='use custom param initialization for BERT')

        # misc params
        parser.add_argument('--activation-fn',
                            choices=utils.get_available_activation_fns(),
                            help='activation function to use')
        parser.add_argument('--pooler-activation-fn',
                            choices=utils.get_available_activation_fns(),
                            help='Which activation function to use for pooler layer.')
        parser.add_argument('--encoder-normalize-before', action='store_true',
                            help='apply layernorm before each encoder block')

    def forward(self, src_tokens, segment_labels=None, **kwargs):
        return self.encoder(src_tokens, segment_labels=segment_labels, **kwargs)

    def max_positions(self):
        return self.encoder.max_positions

    @classmethod
    def build_model(cls, args, task):
        """Build a new model instance."""
        # make sure all arguments are present in older models
        base_architecture(args)

        if not hasattr(args, 'max_positions'):
            args.max_positions = args.tokens_per_sample

        logger.info(args)

        encoder = MaskedLMEncoder(args, task.dictionary)
        return cls(args, encoder)


class MaskedLMEncoder(FairseqEncoder):
    """
    Encoder for Masked Language Modelling.
    """

    def __init__(self, args, dictionary):
        super().__init__(dictionary)

        self.padding_idx = dictionary.pad()
        self.vocab_size = dictionary.__len__()
        self.max_positions = args.max_positions

        self.sentence_encoder = TransformerSentenceEncoder(
            padding_idx=self.padding_idx,
            vocab_size=self.vocab_size,
            num_encoder_layers=args.encoder_layers,
            embedding_dim=args.encoder_embed_dim,
            ffn_embedding_dim=args.encoder_ffn_embed_dim,
            num_attention_heads=args.encoder_attention_heads,
            dropout=args.dropout,
            attention_dropout=args.attention_dropout,
            activation_dropout=args.act_dropout,
            max_seq_len=self.max_positions,
            num_segments=args.num_segment,
            use_position_embeddings=not args.no_token_positional_embeddings,
            encoder_normalize_before=args.encoder_normalize_before,
            apply_bert_init=args.apply_bert_init,
            activation_fn=args.activation_fn,
            learned_pos_embedding=args.encoder_learned_pos,
            add_bias_kv=args.bias_kv,
            add_zero_attn=args.zero_attn,
        )

        self.share_input_output_embed = args.share_encoder_input_output_embed
        self.embed_out = None
        self.sentence_projection_layer = None
        self.sentence_out_dim = args.sentence_class_num
        self.lm_output_learned_bias = None

        # Remove head is set to true during fine-tuning
        self.load_softmax = not getattr(args, 'remove_head', False)

        self.masked_lm_pooler = nn.Linear(
            args.encoder_embed_dim, args.encoder_embed_dim
        )
        self.pooler_activation = utils.get_activation_fn(args.pooler_activation_fn)

        self.lm_head_transform_weight = nn.Linear(args.encoder_embed_dim, args.encoder_embed_dim)
        self.activation_fn = utils.get_activation_fn(args.activation_fn)
        self.layer_norm = LayerNorm(args.encoder_embed_dim)

        self.lm_output_learned_bias = None
        if self.load_softmax:
            self.lm_output_learned_bias = nn.Parameter(torch.zeros(self.vocab_size))

            if not self.share_input_output_embed:
                self.embed_out = nn.Linear(
                    args.encoder_embed_dim,
                    self.vocab_size,
                    bias=False
                )

            if args.sent_loss:
                self.sentence_projection_layer = nn.Linear(
                    args.encoder_embed_dim,
                    self.sentence_out_dim,
                    bias=False
                )

    def forward(self, src_tokens, segment_labels=None, **unused):
        """
        Forward pass for Masked LM encoder. This first computes the token
        embedding using the token embedding matrix, position embeddings (if
        specified) and segment embeddings (if specified).

        Here we assume that the sentence representation corresponds to the
        output of the classification_token (see bert_task or cross_lingual_lm
        task for more details).
        Args:
            - src_tokens: B x T matrix representing sentences
            - segment_labels: B x T matrix representing segment label for tokens
        Returns:
            - a tuple of the following:
                - logits for predictions in format B x T x C to be used in
                  softmax afterwards
                - a dictionary of additional data, where 'pooled_output' contains
                  the representation for classification_token and 'inner_states'
                  is a list of internal model states used to compute the
                  predictions (similar in ELMO). 'sentence_logits'
                  is the prediction logit for NSP task and is only computed if
                  this is specified in the input arguments.
        """

        inner_states, sentence_rep = self.sentence_encoder(
            src_tokens,
            segment_labels=segment_labels,
        )

        x = inner_states[-1].transpose(0, 1)
        x = self.layer_norm(self.activation_fn(self.lm_head_transform_weight(x)))

        pooled_output = self.pooler_activation(self.masked_lm_pooler(sentence_rep))

        # project back to size of vocabulary
        if self.share_input_output_embed \
                and hasattr(self.sentence_encoder.embed_tokens, 'weight'):
            x = F.linear(x, self.sentence_encoder.embed_tokens.weight)
        elif self.embed_out is not None:
            x = self.embed_out(x)

        if self.lm_output_learned_bias is not None:
            x = x + self.lm_output_learned_bias
        sentence_logits = None
        if self.sentence_projection_layer:
            sentence_logits = self.sentence_projection_layer(pooled_output)

        return x, {
            'inner_states': inner_states,
            'pooled_output': pooled_output,
            'sentence_logits': sentence_logits
        }

    def max_positions(self):
        """Maximum output length supported by the encoder."""
        return self.max_positions

    def upgrade_state_dict_named(self, state_dict, name):
        if isinstance(
                self.sentence_encoder.embed_positions,
                SinusoidalPositionalEmbedding
        ):
            state_dict[
                name + '.sentence_encoder.embed_positions._float_tensor'
            ] = torch.FloatTensor(1)
        if not self.load_softmax:
            for k in list(state_dict.keys()):
                if (
                    "embed_out.weight" in k or
                    "sentence_projection_layer.weight" in k or
                    "lm_output_learned_bias" in k
                ):
                    del state_dict[k]
        return state_dict


@register_model_architecture('masked_lm', 'masked_lm')
def base_architecture(args):
    args.dropout = getattr(args, 'dropout', 0.1)
    args.attention_dropout = getattr(args, 'attention_dropout', 0.1)
    args.act_dropout = getattr(args, 'act_dropout', 0.0)

    args.encoder_ffn_embed_dim = getattr(args, 'encoder_ffn_embed_dim', 4096)
    args.encoder_layers = getattr(args, 'encoder_layers', 6)
    args.encoder_attention_heads = getattr(args, 'encoder_attention_heads', 8)
    args.bias_kv = getattr(args, 'bias_kv', False)
    args.zero_attn = getattr(args, 'zero_attn', False)

    args.encoder_embed_dim = getattr(args, 'encoder_embed_dim', 1024)
    args.share_encoder_input_output_embed = getattr(args, 'share_encoder_input_output_embed', False)
    args.encoder_learned_pos = getattr(args, 'encoder_learned_pos', False)
    args.no_token_positional_embeddings = getattr(args, 'no_token_positional_embeddings', False)
    args.num_segment = getattr(args, 'num_segment', 2)

    args.sentence_class_num = getattr(args, 'sentence_class_num', 2)
    args.sent_loss = getattr(args, 'sent_loss', False)

    args.apply_bert_init = getattr(args, 'apply_bert_init', False)

    args.activation_fn = getattr(args, 'activation_fn', 'relu')
    args.pooler_activation_fn = getattr(args, 'pooler_activation_fn', 'tanh')
    args.encoder_normalize_before = getattr(args, 'encoder_normalize_before', False)


@register_model_architecture('masked_lm', 'bert_base')
def bert_base_architecture(args):
    args.encoder_embed_dim = getattr(args, 'encoder_embed_dim', 768)
    args.share_encoder_input_output_embed = getattr(
        args, 'share_encoder_input_output_embed', True)
    args.no_token_positional_embeddings = getattr(
        args, 'no_token_positional_embeddings', False)
    args.encoder_learned_pos = getattr(args, 'encoder_learned_pos', True)
    args.num_segment = getattr(args, 'num_segment', 2)

    args.encoder_layers = getattr(args, 'encoder_layers', 12)

    args.encoder_attention_heads = getattr(args, 'encoder_attention_heads', 12)
    args.encoder_ffn_embed_dim = getattr(args, 'encoder_ffn_embed_dim', 3072)
    args.bias_kv = getattr(args, 'bias_kv', False)
    args.zero_attn = getattr(args, 'zero_attn', False)

    args.sentence_class_num = getattr(args, 'sentence_class_num', 2)
    args.sent_loss = getattr(args, 'sent_loss', True)

    args.apply_bert_init = getattr(args, 'apply_bert_init', True)

    args.activation_fn = getattr(args, 'activation_fn', 'gelu')
    args.pooler_activation_fn = getattr(args, 'pooler_activation_fn', 'tanh')
    args.encoder_normalize_before = getattr(args, 'encoder_normalize_before', True)
    base_architecture(args)


@register_model_architecture('masked_lm', 'bert_large')
def bert_large_architecture(args):
    args.encoder_embed_dim = getattr(args, 'encoder_embed_dim', 1024)
    args.encoder_layers = getattr(args, 'encoder_layers', 24)
    args.encoder_attention_heads = getattr(args, 'encoder_attention_heads', 16)
    args.encoder_ffn_embed_dim = getattr(args, 'encoder_ffn_embed_dim', 4096)
    bert_base_architecture(args)


@register_model_architecture('masked_lm', 'xlm_base')
def xlm_architecture(args):
    args.encoder_embed_dim = getattr(args, 'encoder_embed_dim', 1024)
    args.share_encoder_input_output_embed = getattr(
        args, 'share_encoder_input_output_embed', True)
    args.no_token_positional_embeddings = getattr(
        args, 'no_token_positional_embeddings', False)
    args.encoder_learned_pos = getattr(args, 'encoder_learned_pos', True)
    args.num_segment = getattr(args, 'num_segment', 1)

    args.encoder_layers = getattr(args, 'encoder_layers', 6)

    args.encoder_attention_heads = getattr(args, 'encoder_attention_heads', 8)
    args.encoder_ffn_embed_dim = getattr(args, 'encoder_ffn_embed_dim', 4096)
    args.bias_kv = getattr(args, 'bias_kv', False)
    args.zero_attn = getattr(args, 'zero_attn', False)

    args.sent_loss = getattr(args, 'sent_loss', False)

    args.activation_fn = getattr(args, 'activation_fn', 'gelu')
    args.encoder_normalize_before = getattr(args, 'encoder_normalize_before', False)
    args.pooler_activation_fn = getattr(args, 'pooler_activation_fn', 'tanh')
    args.apply_bert_init = getattr(args, 'apply_bert_init', True)
    base_architecture(args)
