# Supplementary material
Source: ML conference proceedings conference paper supplement (https://proceedings.neurips.cc/paper_files/paper/2022/hash/35f805e65c77652efa731edc10c8e3a6-Abstract.html)
Supplement: Supplementary file 1 [file 35f805e65c77652efa731edc10c8e3a6-Supplemental-Conference.zip › Supplementary Material/code/fairseq/models/nat/__init__.py]

from .fairseq_nat_model import *
from .nonautoregressive_transformer import *
from .nat_crf_transformer import *
from .iterative_nonautoregressive_transformer import *
from .cmlm_transformer import *
from .levenshtein_transformer import *
from .insertion_transformer import *
