# Supplementary material
Source: ML conference proceedings conference paper supplement (https://proceedings.neurips.cc/paper_files/paper/2022/hash/35f805e65c77652efa731edc10c8e3a6-Abstract.html)
Supplement: Supplementary file 1 [file 35f805e65c77652efa731edc10c8e3a6-Supplemental-Conference.zip › Supplementary Material/code/fairseq/models/nat/levenshtein_utils.py]

# Copyright (c) Facebook, Inc. and its affiliates.
#
# This source code is licensed under the MIT license found in the
# LICENSE file in the root directory of this source tree.

import torch
from fairseq.utils import new_arange


# -------------- Helper Functions --------------------------------------------------- #

def load_libnat():
    try:
        from fairseq import libnat_cuda
        return libnat_cuda, True

    except ImportError as e:
        print(str(e) + '... fall back to CPU version')

        try:
            from fairseq import libnat
            return libnat, False

        except ImportError as e:
            import sys
            sys.stderr.write("ERROR: missing libnat_cuda. run `python setup.py build_ext --inplace`\n")
            raise e


def _get_ins_targets(in_tokens, out_tokens, padding_idx, unk_idx):
    libnat, use_cuda = load_libnat()

    def _get_ins_targets_cuda(in_tokens, out_tokens, padding_idx, unk_idx):
        in_masks = in_tokens.ne(padding_idx)
        out_masks = out_tokens.ne(padding_idx)
        mask_ins_targets, masked_tgt_masks = libnat.generate_insertion_labels(
            out_tokens.int(), libnat.levenshtein_distance(
                in_tokens.int(), out_tokens.int(),
                in_masks.sum(1).int(), out_masks.sum(1).int()
            )
        )
        masked_tgt_masks = masked_tgt_masks.bool() & out_masks
        mask_ins_targets = mask_ins_targets.type_as(
            in_tokens)[:, 1:in_masks.size(1)].masked_fill_(~in_masks[:, 1:], 0)
        masked_tgt_tokens = out_tokens.masked_fill(masked_tgt_masks, unk_idx)
        return masked_tgt_masks, masked_tgt_tokens, mask_ins_targets

    def _get_ins_targets_cpu(in_tokens, out_tokens, padding_idx, unk_idx):
        in_seq_len, out_seq_len = in_tokens.size(1), out_tokens.size(1)

        in_tokens_list = [
            [t for t in s if t != padding_idx] for i, s in enumerate(in_tokens.tolist())
        ]
        out_tokens_list = [
            [t for t in s if t != padding_idx]
            for i, s in enumerate(out_tokens.tolist())
        ]

        full_labels = libnat.suggested_ed2_path(
            in_tokens_list, out_tokens_list, padding_idx
        )
        mask_inputs = [
            [len(c) if c[0] != padding_idx else 0 for c in a[:-1]] for a in full_labels
        ]

        # generate labels
        masked_tgt_masks = []
        for mask_input in mask_inputs:
            mask_label = []
            for beam_size in mask_input[1:-1]:  # HACK 1:-1
                mask_label += [0] + [1 for _ in range(beam_size)]
            masked_tgt_masks.append(
                mask_label + [0 for _ in range(out_seq_len - len(mask_label))]
            )
        mask_ins_targets = [
            mask_input[1:-1] + [0 for _ in range(in_seq_len - 1 - len(mask_input[1:-1]))]
            for mask_input in mask_inputs
        ]

        # transform to tensor
        masked_tgt_masks = torch.tensor(
            masked_tgt_masks, device=out_tokens.device
        ).bool()
        mask_ins_targets = torch.tensor(mask_ins_targets, device=in_tokens.device)
        masked_tgt_tokens = out_tokens.masked_fill(masked_tgt_masks, unk_idx)
        return masked_tgt_masks, masked_tgt_tokens, mask_ins_targets

    if use_cuda:
        return _get_ins_targets_cuda(in_tokens, out_tokens, padding_idx, unk_idx)
    return _get_ins_targets_cpu(in_tokens, out_tokens, padding_idx, unk_idx)


def _get_del_targets(in_tokens, out_tokens, padding_idx):
    libnat, use_cuda = load_libnat()

    def _get_del_targets_cuda(in_tokens, out_tokens, padding_idx):
        in_masks = in_tokens.ne(padding_idx)
        out_masks = out_tokens.ne(padding_idx)

        word_del_targets = libnat.generate_deletion_labels(
            in_tokens.int(),
            libnat.levenshtein_distance(
                in_tokens.int(), out_tokens.int(),
                in_masks.sum(1).int(), out_masks.sum(1).int()
            )
        )
        word_del_targets = word_del_targets.type_as(in_tokens).masked_fill_(~in_masks, 0)
        return word_del_targets

    def _get_del_targets_cpu(in_tokens, out_tokens, padding_idx):
        out_seq_len = out_tokens.size(1)
        with torch.cuda.device_of(in_tokens):
            in_tokens_list = [
                [t for t in s if t != padding_idx] for i, s in enumerate(in_tokens.tolist())
            ]
            out_tokens_list = [
                [t for t in s if t != padding_idx]
                for i, s in enumerate(out_tokens.tolist())
            ]

        full_labels = libnat.suggested_ed2_path(
            in_tokens_list, out_tokens_list, padding_idx
        )
        word_del_targets = [b[-1] for b in full_labels]
        word_del_targets = [
            labels + [0 for _ in range(out_seq_len - len(labels))]
            for labels in word_del_targets
        ]

        # transform to tensor
        word_del_targets = torch.tensor(word_del_targets, device=out_tokens.device)
        return word_del_targets

    if use_cuda:
        return _get_del_targets_cuda(in_tokens, out_tokens, padding_idx)
    return _get_del_targets_cpu(in_tokens, out_tokens, padding_idx)


def _apply_ins_masks(
    in_tokens, in_scores, mask_ins_pred, padding_idx, unk_idx, eos_idx
):

    in_masks = in_tokens.ne(padding_idx)
    in_lengths = in_masks.sum(1)

    # HACK: hacky way to shift all the paddings to eos first.
    in_tokens.masked_fill_(~in_masks, eos_idx)
    mask_ins_pred.masked_fill_(~in_masks[:, 1:], 0)

    out_lengths = in_lengths + mask_ins_pred.sum(1)
    out_max_len = out_lengths.max()
    out_masks = (
        new_arange(out_lengths, out_max_len)[None, :]
        < out_lengths[:, None]
    )

    reordering = (mask_ins_pred + in_masks[:, 1:].long()).cumsum(1)
    out_tokens = (
        in_tokens.new_zeros(in_tokens.size(0), out_max_len)
        .fill_(padding_idx)
        .masked_fill_(out_masks, unk_idx)
    )
    out_tokens[:, 0] = in_tokens[:, 0]
    out_tokens.scatter_(1, reordering, in_tokens[:, 1:])

    out_scores = None
    if in_scores is not None:
        in_scores.masked_fill_(~in_masks, 0)
        out_scores = in_scores.new_zeros(*out_tokens.size())
        out_scores[:, 0] = in_scores[:, 0]
        out_scores.scatter_(1, reordering, in_scores[:, 1:])

    return out_tokens, out_scores


def _apply_ins_words(
    in_tokens, in_scores, word_ins_pred, word_ins_scores, unk_idx
):
    word_ins_masks = in_tokens.eq(unk_idx)
    out_tokens = in_tokens.masked_scatter(word_ins_masks, word_ins_pred[word_ins_masks])

    if in_scores is not None:
        out_scores = in_scores.masked_scatter(
            word_ins_masks, word_ins_scores[word_ins_masks]
        )
    else:
        out_scores = None

    return out_tokens, out_scores


def _apply_del_words(
    in_tokens, in_scores, in_attn, word_del_pred, padding_idx, bos_idx, eos_idx
):
    # apply deletion to a tensor
    in_masks = in_tokens.ne(padding_idx)
    bos_eos_masks = in_tokens.eq(bos_idx) | in_tokens.eq(eos_idx)

    max_len = in_tokens.size(1)
    word_del_pred.masked_fill_(~in_masks, 1)
    word_del_pred.masked_fill_(bos_eos_masks, 0)

    reordering = (
        new_arange(in_tokens)
        .masked_fill_(word_del_pred, max_len)
        .sort(1)[1]
    )

    out_tokens = in_tokens.masked_fill(word_del_pred, padding_idx).gather(1, reordering)

    out_scores = None
    if in_scores is not None:
        out_scores = in_scores.masked_fill(word_del_pred, 0).gather(1, reordering)

    out_attn = None
    if in_attn is not None:
        _mask = word_del_pred[:, :, None].expand_as(in_attn)
        _reordering = reordering[:, :, None].expand_as(in_attn)
        out_attn = in_attn.masked_fill(_mask, 0.).gather(1, _reordering)

    return out_tokens, out_scores, out_attn


def _skip(x, mask):
    """
    Getting sliced (dim=0) tensor by mask. Supporting tensor and list/dict of tensors.
    """
    if isinstance(x, int):
        return x

    if x is None:
        return None

    if isinstance(x, torch.Tensor):
        if x.size(0) == mask.size(0):
            return x[mask]
        elif x.size(1) == mask.size(0):
            return x[:, mask]

    if isinstance(x, list):
        return [_skip(x_i, mask) for x_i in x]

    if isinstance(x, dict):
        return {k: _skip(v, mask) for k, v in x.items()}

    raise NotImplementedError


def _skip_encoder_out(encoder, encoder_out, mask):
    if not mask.any():
        return encoder_out
    else:
        return encoder.reorder_encoder_out(encoder_out, mask.nonzero().squeeze())


def _fill(x, mask, y, padding_idx):
    """
    Filling tensor x with y at masked positions (dim=0).
    """
    if x is None:
        return y
    assert x.dim() == y.dim() and mask.size(0) == x.size(0)
    assert x.dim() == 2 or (x.dim() == 3 and x.size(2) == y.size(2))
    n_selected = mask.sum()
    assert n_selected == y.size(0)

    if n_selected == x.size(0):
        return y

    if x.size(1) < y.size(1):
        dims = [x.size(0), y.size(1) - x.size(1)]
        if x.dim() == 3:
            dims.append(x.size(2))
        x = torch.cat([x, x.new_zeros(*dims).fill_(padding_idx)], 1)
        x[mask] = y
    elif x.size(1) > y.size(1):
        x[mask] = padding_idx
        if x.dim() == 2:
            x[mask, :y.size(1)] = y
        else:
            x[mask, :y.size(1), :] = y
    else:
        x[mask] = y
    return x
