# Supplementary material
Source: ML conference proceedings conference paper supplement (https://proceedings.neurips.cc/paper_files/paper/2022/hash/35f805e65c77652efa731edc10c8e3a6-Abstract.html)
Supplement: Supplementary file 1 [file 35f805e65c77652efa731edc10c8e3a6-Supplemental-Conference.zip › Supplementary Material/code/fairseq/models/nat/nonautoregressive_transformer.py]

# Copyright (c) Facebook, Inc. and its affiliates.
#
# This source code is licensed under the MIT license found in the
# LICENSE file in the root directory of this source tree.

import torch
import torch.nn.functional as F
import pdb

from fairseq import utils
from fairseq.iterative_refinement_generator import DecoderOut
from fairseq.models import register_model, register_model_architecture
from fairseq.models.transformer import Embedding

from fairseq.models.nat import (
    FairseqNATModel,
    FairseqNATDecoder,
    ensemble_decoder)
from fairseq.modules import LayerNorm, MultiheadAttention
from fairseq.modules.transformer_sentence_encoder import init_bert_params


def _mean_pooling(enc_feats, src_masks):
    # enc_feats: T x B x C
    # src_masks: B x T or None
    if src_masks is None:
        enc_feats = enc_feats.mean(0)
    else:
        src_masks = (~src_masks).transpose(0, 1).type_as(enc_feats)
        enc_feats = (
            (enc_feats / src_masks.sum(0)[None, :, None]) * src_masks[:, :, None]
        ).sum(0)
    return enc_feats


def _argmax(x, dim):
    return (x == x.max(dim, keepdim=True)[0]).type_as(x)


def _uniform_assignment(src_lens, trg_lens):
    max_trg_len = trg_lens.max()
    steps = (src_lens.float() - 1) / (trg_lens.float() - 1)  # step-size
    # max_trg_len
    index_t = utils.new_arange(trg_lens, max_trg_len).float()
    index_t = steps[:, None] * index_t[None, :]  # batch_size X max_trg_len
    index_t = torch.round(index_t).long().detach()
    return index_t


@register_model("nonautoregressive_transformer")
class NATransformerModel(FairseqNATModel):

    @property
    def allow_length_beam(self):
        return True

    @staticmethod
    def add_args(parser):
        FairseqNATModel.add_args(parser)

        # length prediction
        parser.add_argument("--src-embedding-copy", action="store_true",
                            help="copy encoder word embeddings as the initial input of the decoder")
        parser.add_argument("--pred-length-offset", action="store_true",
                            help="predicting the length difference between the target and source sentences")
        parser.add_argument("--sg-length-pred", action="store_true",
                            help="stop the gradients back-propagated from the length predictor")
        parser.add_argument("--length-loss-factor", type=float,
                            help="weights on the length prediction loss")
        parser.add_argument("--src-embedding-attn", action="store_true",
                            help="copy encoder word embeddings as the initial input of the decoder")
    @classmethod
    def build_decoder(cls, args, tgt_dict, embed_tokens):
        decoder = NATransformerDecoder(args, tgt_dict, embed_tokens)
        if getattr(args, "apply_bert_init", False):
            decoder.apply(init_bert_params)
        return decoder

    def forward(
        self, src_tokens, src_lengths, prev_output_tokens, tgt_tokens, **kwargs
    ):
        # encoding
        encoder_out = self.encoder(src_tokens, src_lengths=src_lengths, **kwargs)

        # length prediction
        length_out = self.decoder.forward_length(normalize=False, encoder_out=encoder_out)
        length_tgt = self.decoder.forward_length_prediction(length_out, encoder_out, tgt_tokens)

        # decoding
        word_ins_out = self.decoder(
            normalize=False,
            prev_output_tokens=prev_output_tokens,
            encoder_out=encoder_out)

        return {
            "word_ins": {
                "out": word_ins_out, "tgt": tgt_tokens,
                "mask": tgt_tokens.ne(self.pad), "ls": self.args.label_smoothing,
                "nll_loss": True
            },
            "length": {
                "out": length_out, "tgt": length_tgt,
                "factor": self.decoder.length_loss_factor
            }
        }
    
    def forward_decoder(self, decoder_out, encoder_out, decoding_format=None, **kwargs):
        step = decoder_out.step
        output_tokens = decoder_out.output_tokens
        output_scores = decoder_out.output_scores
        history = decoder_out.history

        # execute the decoder
        output_masks = output_tokens.ne(self.pad)
        log_probs = self.decoder(
            normalize=True,
            prev_output_tokens=output_tokens,
            encoder_out=encoder_out,
            step=step,
        )
        _scores, _tokens = log_probs.max(-1)

        output_tokens.masked_scatter_(output_masks, _tokens[output_masks])
        output_scores.masked_scatter_(output_masks, _scores[output_masks])
        if history is not None:
            history.append(output_tokens.clone())

        return log_probs, decoder_out._replace(
            output_tokens=output_tokens,
            output_scores=output_scores,
            attn=None,
            history=history
        )
    
    def initialize_output_tokens(self, encoder_out, src_tokens):
        # length prediction
        length_tgt = self.decoder.forward_length_prediction(
            self.decoder.forward_length(normalize=True, encoder_out=encoder_out),
            encoder_out=encoder_out
        )
        #length_tgt = (length_tgt*1.0).round().long()
        max_length = length_tgt.clamp_(min=2).max()
        idx_length = utils.new_arange(src_tokens, max_length)

        initial_output_tokens = src_tokens.new_zeros(
            src_tokens.size(0), max_length
        ).fill_(self.pad)
        initial_output_tokens.masked_fill_(
            idx_length[None, :] < length_tgt[:, None], self.unk
        )
        initial_output_tokens[:, 0] = self.bos
        initial_output_tokens.scatter_(1, length_tgt[:, None] - 1, self.eos)

        initial_output_scores = initial_output_tokens.new_zeros(
            *initial_output_tokens.size()
        ).type_as(encoder_out.encoder_out)

        return DecoderOut(
            output_tokens=initial_output_tokens,
            output_scores=initial_output_scores,
            attn=None,
            step=0,
            max_step=0,
            history=None
        )

    def regenerate_length_beam(self, decoder_out, beam_size):
        output_tokens = decoder_out.output_tokens
        length_tgt = output_tokens.ne(self.pad).sum(1)
        length_tgt = length_tgt[:, None] + utils.new_arange(length_tgt, 1, beam_size) - beam_size // 2
        length_tgt = length_tgt.view(-1).clamp_(min=2)
        max_length = length_tgt.max()
        idx_length = utils.new_arange(length_tgt, max_length)

        initial_output_tokens = output_tokens.new_zeros(
            length_tgt.size(0), max_length
        ).fill_(self.pad)
        initial_output_tokens.masked_fill_(
            idx_length[None, :] < length_tgt[:, None], self.unk
        )
        initial_output_tokens[:, 0] = self.bos
        initial_output_tokens.scatter_(1, length_tgt[:, None] - 1, self.eos)

        initial_output_scores = initial_output_tokens.new_zeros(
            *initial_output_tokens.size()
        ).type_as(decoder_out.output_scores)

        return decoder_out._replace(
            output_tokens=initial_output_tokens,
            output_scores=initial_output_scores
        )


class NATransformerDecoder(FairseqNATDecoder):
    def __init__(self, args, dictionary, embed_tokens, no_encoder_attn=False):
        super().__init__(
            args, dictionary, embed_tokens, no_encoder_attn=no_encoder_attn
        )
        self.dictionary = dictionary
        self.bos = dictionary.bos()
        self.unk = dictionary.unk()
        self.eos = dictionary.eos()

        self.encoder_embed_dim = args.encoder_embed_dim
        self.sg_length_pred = getattr(args, "sg_length_pred", False)
        self.pred_length_offset = getattr(args, "pred_length_offset", False)
        self.length_loss_factor = getattr(args, "length_loss_factor", 0.1)
        self.src_embedding_copy = getattr(args, "src_embedding_copy", False)
        self.src_embedding_attn = getattr(args, "src_embedding_attn", False)
        self.embed_length = Embedding(256, self.encoder_embed_dim, None)
        if self.src_embedding_attn:
            self.pos_attn = MultiheadAttention(
                self.encoder_embed_dim,
                args.decoder_attention_heads,
                self.encoder_embed_dim,
                self.encoder_embed_dim,
                dropout=args.attention_dropout,
                encoder_decoder_attention=True,
            )
    @ensemble_decoder
    def forward(self, normalize, encoder_out, prev_output_tokens, step=0, **unused):
        features, _ = self.extract_features(
            prev_output_tokens,
            encoder_out=encoder_out,
            embedding_copy=(step == 0) & (self.src_embedding_copy or self.src_embedding_attn),
        )
        decoder_out = self.output_layer(features)
        #f=open("entropy","a")
        #entropy = F.log_softmax(decoder_out,-1)*F.softmax(decoder_out,-1)
        #batch, length, _ = entropy.size()
        #entropy = torch.sum(entropy)
        #f.write(str(entropy.item()) + ' ' + str(batch * length)+'\n')
        #f.close()
        return F.log_softmax(decoder_out, -1) if normalize else decoder_out

    @ensemble_decoder
    def forward_length(self, normalize, encoder_out):
        enc_feats = encoder_out.encoder_out  # T x B x C
        src_masks = encoder_out.encoder_padding_mask  # B x T or None
        enc_feats = _mean_pooling(enc_feats, src_masks)
        if self.sg_length_pred:
            enc_feats = enc_feats.detach()
        length_out = F.linear(enc_feats, self.embed_length.weight)
        return F.log_softmax(length_out, -1) if normalize else length_out

    def extract_features(
        self,
        prev_output_tokens,
        encoder_out=None,
        early_exit=None,
        embedding_copy=False,
        **unused
    ):
        """
        Similar to *forward* but only return features.

        Inputs:
            prev_output_tokens: Tensor(B, T)
            encoder_out: a dictionary of hidden states and masks

        Returns:
            tuple:
                - the decoder's features of shape `(batch, tgt_len, embed_dim)`
                - a dictionary with any model-specific outputs
            the LevenshteinTransformer decoder has full-attention to all generated tokens
        """
        # embedding
        if embedding_copy:
            if self.src_embedding_copy:
                src_embd = encoder_out.encoder_out.transpose(0,1)
                #src_embd = encoder_out.encoder_embedding
                src_mask = encoder_out.encoder_padding_mask
                src_mask = (
                    ~src_mask
                    if src_mask is not None
                    else prev_output_tokens.new_ones(*src_embd.size()[:2]).bool()
                )

                x, decoder_padding_mask = self.forward_embedding(
                    prev_output_tokens,
                    self.forward_copying_source(
                        src_embd, src_mask, prev_output_tokens.ne(self.padding_idx)
                    ),
                )
            elif self.src_embedding_attn:
                positions = self.embed_positions(prev_output_tokens).transpose(0, 1)
                src_mask = encoder_out.encoder_padding_mask
                src_encoder_out = encoder_out.encoder_out
                states, attn = self.pos_attn(
                    query=positions,
                    key=src_encoder_out,
                    value=src_encoder_out,
                    key_padding_mask=src_mask,
                    incremental_state=None,
                    static_kv=True,
                    need_weights=False,
                )
                states = states.transpose(0, 1)
                x, decoder_padding_mask = self.forward_embedding(
                    prev_output_tokens,
                    states,
                )

            else:
                raise NotImplementedError

        else:

            x, decoder_padding_mask = self.forward_embedding(prev_output_tokens)

        # B x T x C -> T x B x C
        x = x.transpose(0, 1)
        attn = None
        inner_states = [x]

        # decoder layers
        for i, layer in enumerate(self.layers):

            # early exit from the decoder.
            if (early_exit is not None) and (i >= early_exit):
                break

            x, attn, _ = layer(
                x,
                encoder_out.encoder_out if encoder_out is not None else None,
                encoder_out.encoder_padding_mask if encoder_out is not None else None,
                self_attn_mask=None,
                self_attn_padding_mask=decoder_padding_mask,
            )
            inner_states.append(x)

        if self.layer_norm:
            x = self.layer_norm(x)

        # T x B x C -> B x T x C
        x = x.transpose(0, 1)

        if self.project_out_dim is not None:
            x = self.project_out_dim(x)

        return x, {"attn": attn, "inner_states": inner_states}

    def forward_embedding(self, prev_output_tokens, states=None):
        # embed positions
        positions = (
            self.embed_positions(prev_output_tokens)
            if self.embed_positions is not None
            else None
        )

        # embed tokens and positions
        if states is None:
            x = self.embed_scale * self.embed_tokens(prev_output_tokens)
            if self.project_in_dim is not None:
                x = self.project_in_dim(x)
        else:
            x = states

        if positions is not None:
            x += positions
        x = F.dropout(x, p=self.dropout, training=self.training)
        decoder_padding_mask = prev_output_tokens.eq(self.padding_idx)
        return x, decoder_padding_mask

    def forward_copying_source(self, src_embeds, src_masks, tgt_masks):
        length_sources = src_masks.sum(1)
        length_targets = tgt_masks.sum(1)
        mapped_inputs = _uniform_assignment(length_sources, length_targets).masked_fill(
            ~tgt_masks, 0
        )
        copied_embedding = torch.gather(
            src_embeds,
            1,
            mapped_inputs.unsqueeze(-1).expand(
                *mapped_inputs.size(), src_embeds.size(-1)
            ),
        )
        return copied_embedding

    def forward_length_prediction(self, length_out, encoder_out, tgt_tokens=None):
        enc_feats = encoder_out.encoder_out  # T x B x C
        src_masks = encoder_out.encoder_padding_mask  # B x T or None
        if self.pred_length_offset:
            if src_masks is None:
                src_lengs = enc_feats.new_ones(enc_feats.size(1)).fill_(
                    enc_feats.size(0)
                )
            else:
                src_lengs = (~src_masks).transpose(0, 1).type_as(enc_feats).sum(0)
            src_lengs = src_lengs.long()

        if tgt_tokens is not None:
            # obtain the length target
            tgt_lengs = tgt_tokens.ne(self.padding_idx).sum(1).long()
            if self.pred_length_offset:
                length_tgt = tgt_lengs - src_lengs + 128
            else:
                length_tgt = tgt_lengs
            length_tgt = length_tgt.clamp(min=0, max=255)

        else:
            # predict the length target (greedy for now)
            # TODO: implementing length-beam
            pred_lengs = length_out.max(-1)[1]
            if self.pred_length_offset:
                length_tgt = pred_lengs - 128 + src_lengs
            else:
                length_tgt = pred_lengs
            length_tgt = 3 * src_lengs

        return length_tgt


@register_model_architecture(
    "nonautoregressive_transformer", "nonautoregressive_transformer"
)
def base_architecture(args):
    args.encoder_embed_path = getattr(args, "encoder_embed_path", None)
    args.encoder_embed_dim = getattr(args, "encoder_embed_dim", 512)
    args.encoder_ffn_embed_dim = getattr(args, "encoder_ffn_embed_dim", 2048)
    args.encoder_layers = getattr(args, "encoder_layers", 6)
    args.encoder_attention_heads = getattr(args, "encoder_attention_heads", 8)
    args.encoder_normalize_before = getattr(args, "encoder_normalize_before", False)
    args.encoder_learned_pos = getattr(args, "encoder_learned_pos", False)
    args.decoder_embed_path = getattr(args, "decoder_embed_path", None)
    args.decoder_embed_dim = getattr(args, "decoder_embed_dim", args.encoder_embed_dim)
    args.decoder_ffn_embed_dim = getattr(
        args, "decoder_ffn_embed_dim", args.encoder_ffn_embed_dim
    )
    args.decoder_layers = getattr(args, "decoder_layers", 6)
    args.decoder_attention_heads = getattr(args, "decoder_attention_heads", 8)
    args.decoder_normalize_before = getattr(args, "decoder_normalize_before", False)
    args.decoder_learned_pos = getattr(args, "decoder_learned_pos", False)
    args.attention_dropout = getattr(args, "attention_dropout", 0.0)
    args.activation_dropout = getattr(args, "activation_dropout", 0.0)
    args.activation_fn = getattr(args, "activation_fn", "relu")
    args.dropout = getattr(args, "dropout", 0.1)
    args.adaptive_softmax_cutoff = getattr(args, "adaptive_softmax_cutoff", None)
    args.adaptive_softmax_dropout = getattr(args, "adaptive_softmax_dropout", 0)
    args.share_decoder_input_output_embed = getattr(
        args, "share_decoder_input_output_embed", False
    )
    args.share_all_embeddings = getattr(args, "share_all_embeddings", False)
    args.no_token_positional_embeddings = getattr(
        args, "no_token_positional_embeddings", False
    )
    args.adaptive_input = getattr(args, "adaptive_input", False)
    args.apply_bert_init = getattr(args, "apply_bert_init", False)

    args.decoder_output_dim = getattr(
        args, "decoder_output_dim", args.decoder_embed_dim
    )
    args.decoder_input_dim = getattr(args, "decoder_input_dim", args.decoder_embed_dim)

    # --- special arguments ---
    args.sg_length_pred = getattr(args, "sg_length_pred", False)
    args.pred_length_offset = getattr(args, "pred_length_offset", False)
    args.length_loss_factor = getattr(args, "length_loss_factor", 0.1)
    args.src_embedding_copy = getattr(args, "src_embedding_copy", False)


@register_model_architecture(
    "nonautoregressive_transformer", "nonautoregressive_transformer_wmt_en_de"
)
def nonautoregressive_transformer_wmt_en_de(args):
    base_architecture(args)
