# Supplementary material
Source: ML conference proceedings conference paper supplement (https://proceedings.neurips.cc/paper_files/paper/2022/hash/35f805e65c77652efa731edc10c8e3a6-Abstract.html)
Supplement: Supplementary file 1 [file 35f805e65c77652efa731edc10c8e3a6-Supplemental-Conference.zip › Supplementary Material/code/fairseq/models/wav2vec.py]

# Copyright (c) Facebook, Inc. and its affiliates.
#
# This source code is licensed under the MIT license found in the
# LICENSE file in the root directory of this source tree.

import logging
import math
import sys

import torch
import torch.nn as nn
import torch.nn.functional as F

from fairseq.models import (
    BaseFairseqModel, register_model, register_model_architecture
)


logger = logging.getLogger(__name__)


@register_model('wav2vec')
class Wav2VecModel(BaseFairseqModel):

    @staticmethod
    def add_args(parser):
        """Add model-specific arguments to the parser."""
        parser.add_argument('--prediction-steps', type=int, metavar='N', help='number of steps ahead to predict')
        parser.add_argument('--sample-distance', type=int, metavar='N',
                            help='sample distance from target. does not work properly with cross-sampling')
        parser.add_argument('--cross-sample-negatives', action='store_true',
                            help='whether to sample negatives across examples in the same batch')
        parser.add_argument('--num-negatives', type=int, metavar='N', help='number of negative examples')
        parser.add_argument('--conv-feature-layers', type=str, metavar='EXPR',
                            help='convolutional feature extraction layers [(dim, kernel_size, stride), ...]')
        parser.add_argument('--conv-aggregator-layers', type=str, metavar='EXPR',
                            help='convolutional feature extraction layers [(dim, kernel_size, stride), ...]')
        parser.add_argument('--dropout', type=float, metavar='D', help='dropout to apply within the model')
        parser.add_argument('--dropout-features', type=float, metavar='D', help='dropout to apply to the features')
        parser.add_argument('--dropout-agg', type=float, metavar='D', help='dropout to apply after aggregation step')
        parser.add_argument('--encoder', type=str, choices=['cnn'], help='type of encoder to use')
        parser.add_argument('--aggregator', type=str, choices=['cnn', 'gru'],
                            help='type of aggregator to use')
        parser.add_argument('--gru-dim', type=int, metavar='N', help='GRU dimensionality')

        parser.add_argument('--no-conv-bias', action='store_true',
                            help='if set, does not learn bias for conv layers')
        parser.add_argument('--agg-zero-pad', action='store_true',
                            help='if set, zero pads in aggregator instead of repl pad')

        parser.add_argument('--skip-connections-feat', action='store_true',
                            help='if set, adds skip connections to the feature extractor')
        parser.add_argument('--skip-connections-agg', action='store_true',
                            help='if set, adds skip connections to the aggregator')
        parser.add_argument('--residual-scale', type=float, metavar='D',
                            help='scales residual by sqrt(value)')

        parser.add_argument('--log-compression', action='store_true',
                            help='if set, adds a log compression to feature extractor')

        parser.add_argument('--balanced-classes', action='store_true',
                            help='if set, loss is scaled to balance for number of negatives')
        parser.add_argument('--project-features', choices=['none', 'same', 'new'],
                            help='if not none, features are projected using the (same or new) aggregator')

        parser.add_argument('--non-affine-group-norm', action='store_true',
                            help='if set, group norm is not affine')

        parser.add_argument('--offset', help='if set, introduces an offset from target to predictions. '
                                             'if set to "auto", it is computed automatically from the receptive field')

    @classmethod
    def build_model(cls, args, task):
        """Build a new model instance."""

        # make sure all arguments are present in older models
        base_wav2vec_architecture(args)

        model = Wav2VecModel(args)
        logger.info(model)
        return model

    def __init__(self, args):
        super().__init__()

        self.prediction_steps = args.prediction_steps

        offset = args.offset

        if args.encoder == 'cnn':
            feature_enc_layers = eval(args.conv_feature_layers)
            self.feature_extractor = ConvFeatureExtractionModel(
                conv_layers=feature_enc_layers,
                dropout=0.,
                log_compression=args.log_compression,
                skip_connections=args.skip_connections_feat,
                residual_scale=args.residual_scale,
                non_affine_group_norm=args.non_affine_group_norm,
            )
            embed = feature_enc_layers[-1][0]
        else:
            raise Exception('unknown encoder type ' + args.encoder)

        if args.offset == 'auto':
            assert args.encoder == 'cnn'
            jin = 0
            rin = 0
            for _, k, stride in feature_enc_layers:
                if rin == 0:
                    rin = k
                rin = rin + (k - 1) * jin
                if jin == 0:
                    jin = stride
                else:
                    jin *= stride
            offset = math.ceil(rin / jin)

        offset = int(offset)

        def make_aggregator():
            if args.aggregator == 'cnn':
                agg_layers = eval(args.conv_aggregator_layers)
                agg_dim = agg_layers[-1][0]
                feature_aggregator = ConvAggegator(
                    conv_layers=agg_layers,
                    embed=embed,
                    dropout=args.dropout,
                    skip_connections=args.skip_connections_agg,
                    residual_scale=args.residual_scale,
                    non_affine_group_norm=args.non_affine_group_norm,
                    conv_bias=not args.no_conv_bias,
                    zero_pad=args.agg_zero_pad,
                )
            elif args.aggregator == 'gru':
                agg_dim = args.gru_dim
                feature_aggregator = nn.Sequential(
                    TransposeLast(),
                    nn.GRU(
                        input_size=embed,
                        hidden_size=agg_dim,
                        num_layers=1,
                        dropout=args.dropout,
                    ),
                    TransposeLast(deconstruct_idx=0),
                )
            else:
                raise Exception('unknown aggregator type ' + args.aggregator)

            return feature_aggregator, agg_dim

        self.feature_aggregator, agg_dim = make_aggregator()

        self.wav2vec_predictions = Wav2VecPredictionsModel(
            in_dim=agg_dim,
            out_dim=embed,
            prediction_steps=args.prediction_steps,
            n_negatives=args.num_negatives,
            cross_sample_negatives=args.cross_sample_negatives,
            sample_distance=args.sample_distance,
            dropout=args.dropout,
            offset=offset,
            balanced_classes=args.balanced_classes,
        )

        self.dropout_feats = nn.Dropout(p=args.dropout_features)
        self.dropout_agg = nn.Dropout(p=args.dropout_agg)

        if args.project_features == 'none':
            self.project_features = None
        elif args.project_features == 'same':
            self.project_features = self.feature_aggregator
        elif args.project_features == 'new':
            self.project_features, _ = make_aggregator()

    def forward(self, source):
        result = {}

        features = self.feature_extractor(source)

        x = self.dropout_feats(features)
        x = self.feature_aggregator(x)
        x = self.dropout_agg(x)

        if self.project_features is not None:
            features = self.project_features(features)
        x, targets = self.wav2vec_predictions(x, features)
        result['cpc_logits'] = x
        result['cpc_targets'] = targets

        return result

    def upgrade_state_dict_named(self, state_dict, name):
        super().upgrade_state_dict_named(state_dict, name)

    def max_positions(self):
        """Maximum length supported by the model."""
        return sys.maxsize

    def get_logits(self, net_output):
        logits = net_output['cpc_logits']
        return logits

    def get_targets(self, sample, net_output):
        t = net_output['cpc_targets']
        return t.contiguous()

    def get_target_weights(self, targets, net_output):
        targets = net_output['cpc_targets']
        if isinstance(targets, tuple) and targets[-1] is not None:
            return targets[-1]
        return 1.


class TransposeLast(nn.Module):
    def __init__(self, deconstruct_idx=None):
        super().__init__()
        self.deconstruct_idx = deconstruct_idx

    def forward(self, x):
        if self.deconstruct_idx is not None:
            x = x[self.deconstruct_idx]
        return x.transpose(-2, -1)


class Fp32GroupNorm(nn.GroupNorm):
    def __init__(self, *args, **kwargs):
        super().__init__(*args, **kwargs)

    def forward(self, input):
        output = F.group_norm(
            input.float(), self.num_groups, self.weight.float() if self.weight is not None else None,
            self.bias.float() if self.bias is not None else None, self.eps)
        return output.type_as(input)


class Fp32LayerNorm(nn.LayerNorm):
    def __init__(self, *args, **kwargs):
        super().__init__(*args, **kwargs)

    def forward(self, input):
        output = F.layer_norm(
            input.float(), self.normalized_shape, self.weight.float() if self.weight is not None else None,
            self.bias.float() if self.bias is not None else None, self.eps)
        return output.type_as(input)


def norm_block(is_layer_norm, dim, affine=True):
    if is_layer_norm:
        mod = nn.Sequential(
            TransposeLast(),
            Fp32LayerNorm(dim, elementwise_affine=affine),
            TransposeLast(),
        )
    else:
        mod = Fp32GroupNorm(1, dim, affine=affine)

    return mod


class ConvFeatureExtractionModel(nn.Module):
    def __init__(self, conv_layers, dropout, log_compression, skip_connections, residual_scale, non_affine_group_norm):
        super().__init__()

        def block(n_in, n_out, k, stride):
            return nn.Sequential(
                nn.Conv1d(n_in, n_out, k, stride=stride, bias=False),
                nn.Dropout(p=dropout),
                norm_block(is_layer_norm=False, dim=n_out, affine=not non_affine_group_norm),
                nn.ReLU(),
            )

        in_d = 1
        self.conv_layers = nn.ModuleList()
        for dim, k, stride in conv_layers:
            self.conv_layers.append(
                block(in_d, dim, k, stride)
            )
            in_d = dim

        self.log_compression = log_compression
        self.skip_connections = skip_connections
        self.residual_scale = math.sqrt(residual_scale)

    def forward(self, x):
        # BxT -> BxCxT
        x = x.unsqueeze(1)

        for conv in self.conv_layers:
            residual = x
            x = conv(x)
            if self.skip_connections and x.size(1) == residual.size(1):
                tsz = x.size(2)
                r_tsz = residual.size(2)
                residual = residual[..., ::r_tsz // tsz][..., :tsz]
                x = (x + residual) * self.residual_scale

        if self.log_compression:
            x = x.abs()
            x = x + 1
            x = x.log()

        return x


class ZeroPad1d(nn.Module):
    def __init__(self, pad_left, pad_right):
        super().__init__()
        self.pad_left = pad_left
        self.pad_right = pad_right

    def forward(self, x):
        return F.pad(x, (self.pad_left, self.pad_right))


class ConvAggegator(nn.Module):
    def __init__(self, conv_layers, embed, dropout, skip_connections, residual_scale, non_affine_group_norm, conv_bias,
                 zero_pad):
        super().__init__()

        def block(n_in, n_out, k, stride):
            # padding dims only really make sense for stride = 1
            ka = k // 2
            kb = ka - 1 if k % 2 == 0 else ka

            pad = ZeroPad1d(ka + kb, 0) if zero_pad else nn.ReplicationPad1d((ka + kb, 0))

            return nn.Sequential(
                pad,
                nn.Conv1d(n_in, n_out, k, stride=stride, bias=conv_bias),
                nn.Dropout(p=dropout),
                norm_block(False, n_out, affine=not non_affine_group_norm),
                nn.ReLU(),
            )

        in_d = embed
        self.conv_layers = nn.ModuleList()
        self.residual_proj = nn.ModuleList()
        for dim, k, stride in conv_layers:
            if in_d != dim and skip_connections:
                self.residual_proj.append(
                    nn.Conv1d(in_d, dim, 1, bias=False),
                )
            else:
                self.residual_proj.append(None)

            self.conv_layers.append(
                block(in_d, dim, k, stride)
            )
            in_d = dim
        self.conv_layers = nn.Sequential(*self.conv_layers)
        self.skip_connections = skip_connections
        self.residual_scale = math.sqrt(residual_scale)

    def forward(self, x):
        for rproj, conv in zip(self.residual_proj, self.conv_layers):
            residual = x
            x = conv(x)
            if self.skip_connections:
                if rproj is not None:
                    residual = rproj(residual)
                x = (x + residual) * self.residual_scale
        return x


class Wav2VecPredictionsModel(nn.Module):
    def __init__(self, in_dim, out_dim, prediction_steps, n_negatives, cross_sample_negatives, sample_distance,
                 dropout, offset, balanced_classes):
        super().__init__()

        self.n_negatives = n_negatives
        self.cross_sample_negatives = cross_sample_negatives
        self.sample_distance = sample_distance

        self.project_to_steps = nn.ConvTranspose2d(in_dim, out_dim, (1, prediction_steps))
        self.dropout = nn.Dropout(p=dropout)
        self.offset = offset
        self.balanced_classes = balanced_classes

    def sample_negatives(self, y):
        bsz, fsz, tsz = y.shape

        y = y.transpose(0, 1)  # BCT -> CBT
        y = y.contiguous().view(fsz, -1)  # CBT => C(BxT)

        if self.cross_sample_negatives:
            high = tsz * bsz
            assert self.sample_distance is None, 'sample distance is not supported with cross sampling'
        else:
            high = tsz if self.sample_distance is None else min(tsz, self.sample_distance)

        neg_idxs = torch.randint(low=0, high=high, size=(bsz, self.n_negatives * tsz))

        if self.sample_distance is not None and self.sample_distance < tsz:
            neg_idxs += torch.cat(
                [torch.arange(start=1, end=tsz - self.sample_distance, device=neg_idxs.device, dtype=neg_idxs.dtype),
                 torch.arange(start=tsz - self.sample_distance, end=tsz - self.sample_distance * 2 - 1, step=-1,
                              device=neg_idxs.device, dtype=neg_idxs.dtype)])

        if not self.cross_sample_negatives:
            for i in range(1, bsz):
                neg_idxs[i] += i * high

        negs = y[..., neg_idxs.view(-1)]
        negs = negs.view(fsz, bsz, self.n_negatives, tsz).permute(2, 1, 0, 3)  # to NxBxCxT

        return negs

    def forward(self, x, y):
        negatives = self.sample_negatives(y)
        y = y.unsqueeze(0)
        targets = torch.cat([y, negatives], dim=0)

        x = x.unsqueeze(-1)
        x = self.project_to_steps(x)  # BxCxTxS
        x = self.dropout(x)
        x = x.unsqueeze(0).expand(targets.size(0), -1, -1, -1, -1)

        copies, bsz, dim, tsz, steps = x.shape
        steps = min(steps, tsz - self.offset)
        predictions = x.new(bsz * copies * (tsz - self.offset + 1) * steps - ((steps + 1) * steps // 2) * copies * bsz)
        labels = torch.zeros_like(predictions)
        weights = torch.full_like(labels, 1 / self.n_negatives) if self.balanced_classes else None

        start = end = 0
        for i in range(steps):
            offset = i + self.offset
            end = start + (tsz - offset) * bsz * copies
            pos_num = (end - start) // copies
            predictions[start:end] = (x[..., :-offset, i] * targets[..., offset:]).sum(dim=2).flatten()
            labels[start:start + pos_num] = 1.
            if weights is not None:
                weights[start:start + pos_num] = 1.
            start = end
        assert end == predictions.numel(), '{} != {}'.format(end, predictions.numel())

        if weights is not None:
            labels = (labels, weights)

        return predictions, labels


@register_model_architecture('wav2vec', 'wav2vec')
def base_wav2vec_architecture(args):
    conv_feature_layers = '[(512, 10, 5)]'
    conv_feature_layers += ' + [(512, 8, 4)]'
    conv_feature_layers += ' + [(512, 4, 2)] * 3'
    args.conv_feature_layers = getattr(args, 'conv_feature_layers', conv_feature_layers)

    args.conv_aggregator_layers = getattr(args, 'conv_aggregator_layers', '[(512, 3, 1)] * 9')

    args.prediction_steps = getattr(args, 'prediction_steps', 12)
    args.num_negatives = getattr(args, 'num_negatives', 1)
    args.sample_distance = getattr(args, 'sample_distance', None)
    args.cross_sample_negatives = getattr(args, 'cross_sample_negatives', False)

    args.dropout = getattr(args, 'dropout', 0.)
    args.dropout_features = getattr(args, 'dropout_features', 0.)
    args.dropout_agg = getattr(args, 'dropout_agg', 0.)
    args.encoder = getattr(args, 'encoder', 'cnn')
    args.aggregator = getattr(args, 'aggregator', 'cnn')

    args.skip_connections_feat = getattr(args, 'skip_connections_feat', False)
    args.skip_connections_agg = getattr(args, 'skip_connections_agg', False)
    args.residual_scale = getattr(args, 'residual_scale', 0.5)

    args.gru_dim = getattr(args, 'gru_dim', 512)

    args.no_conv_bias = getattr(args, 'no_conv_bias', False)
    args.agg_zero_pad = getattr(args, 'agg_zero_pad', False)

    args.log_compression = getattr(args, 'log_compression', False)

    args.balanced_classes = getattr(args, 'balanced_classes', False)
    args.project_features = getattr(args, 'project_features', 'none')

    args.non_affine_group_norm = getattr(args, 'non_affine_group_norm', False)

    args.offset = getattr(args, 'offset', 'auto')
