# Supplementary material
Source: ML conference proceedings conference paper supplement (https://proceedings.neurips.cc/paper_files/paper/2022/hash/35f805e65c77652efa731edc10c8e3a6-Abstract.html)
Supplement: Supplementary file 1 [file 35f805e65c77652efa731edc10c8e3a6-Supplemental-Conference.zip › Supplementary Material/code/fairseq/modules/dynamicconv_layer/dynamiconv_cpu.cpp]

#include <torch/torch.h>
#include <vector>

std::vector<float*> dynamicconv_cpu_forward(
    float* input,
    float* filters,
    int padding_l);

std::vector<float*> dynamicconv_cpu_backward(
    float* gradOutput,
    int padding_l,
    float* input,
    float* filters);

std::vector<float*> dynamicconv_forward(
    float* input,
    float* filters,
    int padding_l) {

    return dynamicconv_cpu_forward(input, filters, padding_l);
}

std::vector<float*> dynamicconv_backward(
    float* gradOutput,
    int padding_l,
    float* input,
    float* filters) {

    return dynamicconv_cpu_backward(gradOutput, padding_l, input, filters);
}

PYBIND11_MODULE(TORCH_EXTENSION_NAME, m) {
    m.def("forward", &dynamicconv_forward, "dynamicconv forward (CPU)");
    m.def("backward", &dynamicconv_backward, "dynamicconv backward (CPU)");
}
