# Supplementary material
Source: ML conference proceedings conference paper supplement (https://proceedings.neurips.cc/paper_files/paper/2022/hash/35f805e65c77652efa731edc10c8e3a6-Abstract.html)
Supplement: Supplementary file 1 [file 35f805e65c77652efa731edc10c8e3a6-Supplemental-Conference.zip › Supplementary Material/code/fairseq/modules/dynamicconv_layer/setup.py]

#!/usr/bin/env python3
# Copyright (c) Facebook, Inc. and its affiliates.
#
# This source code is licensed under the MIT license found in the
# LICENSE file in the root directory of this source tree.

from setuptools import setup
from torch.utils.cpp_extension import CUDAExtension, BuildExtension

setup(
    name='dynamicconv_layer',
    ext_modules=[
        CUDAExtension(
            name='dynamicconv_cuda',
            sources=[
                'dynamicconv_cuda.cpp',
                'dynamicconv_cuda_kernel.cu',
            ],
        ),
    ],
    cmdclass={
        'build_ext': BuildExtension
    })
