# Supplementary material
Source: ML conference proceedings conference paper supplement (https://proceedings.neurips.cc/paper_files/paper/2022/hash/35f805e65c77652efa731edc10c8e3a6-Abstract.html)
Supplement: Supplementary file 1 [file 35f805e65c77652efa731edc10c8e3a6-Supplemental-Conference.zip › Supplementary Material/code/fairseq/modules/learned_positional_embedding.py]

# Copyright (c) Facebook, Inc. and its affiliates.
#
# This source code is licensed under the MIT license found in the
# LICENSE file in the root directory of this source tree.

import torch.nn as nn

from fairseq import utils


class LearnedPositionalEmbedding(nn.Embedding):
    """
    This module learns positional embeddings up to a fixed maximum size.
    Padding ids are ignored by either offsetting based on padding_idx
    or by setting padding_idx to None and ensuring that the appropriate
    position ids are passed to the forward function.
    """

    def __init__(
            self,
            num_embeddings: int,
            embedding_dim: int,
            padding_idx: int,
    ):
        super().__init__(num_embeddings, embedding_dim, padding_idx)
        self.onnx_trace = False
        if self.padding_idx is not None:
            self.max_positions = self.num_embeddings - self.padding_idx - 1
        else:
            self.max_positions = self.num_embeddings

    def forward(self, input, incremental_state=None, positions=None):
        """Input is expected to be of size [bsz x seqlen]."""
        assert (
            (positions is None) or (self.padding_idx is None)
        ), "If positions is pre-computed then padding_idx should not be set."

        if positions is None:
            if incremental_state is not None:
                # positions is the same for every token when decoding a single step
                # Without the int() cast, it doesn't work in some cases when exporting to ONNX
                positions = input.data.new(1, 1).fill_(int(self.padding_idx + input.size(1)))
            else:
                positions = utils.make_positions(
                    input, self.padding_idx, onnx_trace=self.onnx_trace,
                )
        return super().forward(positions)
