# Supplementary material
Source: ML conference proceedings conference paper supplement (https://proceedings.neurips.cc/paper_files/paper/2022/hash/35f805e65c77652efa731edc10c8e3a6-Abstract.html)
Supplement: Supplementary file 1 [file 35f805e65c77652efa731edc10c8e3a6-Supplemental-Conference.zip › Supplementary Material/code/fairseq/modules/lightweight_convolution.py]

# Copyright (c) Facebook, Inc. and its affiliates.
#
# This source code is licensed under the MIT license found in the
# LICENSE file in the root directory of this source tree.

import torch
import torch.nn as nn
import torch.nn.functional as F

from fairseq import utils
from fairseq.modules.unfold import unfold1d
from fairseq.incremental_decoding_utils import with_incremental_state


def LightweightConv(input_size, kernel_size=1, padding_l=None, num_heads=1,
                    weight_dropout=0., weight_softmax=False, bias=False):
    if torch.cuda.is_available():
        try:
            from fairseq.modules.lightconv_layer import LightconvLayer
            return LightconvLayer(input_size, kernel_size=kernel_size,
                                  padding_l=padding_l, num_heads=num_heads,
                                  weight_dropout=weight_dropout,
                                  weight_softmax=weight_softmax, bias=bias)
        except ImportError as e:
            print(e)
    return LightweightConv1dTBC(input_size, kernel_size=kernel_size,
                                padding_l=padding_l, num_heads=num_heads,
                                weight_dropout=weight_dropout,
                                weight_softmax=weight_softmax, bias=bias)


class LightweightConv1d(nn.Module):
    '''Lightweight Convolution assuming the input is BxCxT
    This is just an example that explains LightConv clearer than the TBC version.
    We don't use this module in the model.

    Args:
        input_size: # of channels of the input and output
        kernel_size: convolution channels
        padding: padding
        num_heads: number of heads used. The weight is of shape
            `(num_heads, 1, kernel_size)`
        weight_softmax: normalize the weight with softmax before the convolution

    Shape:
        Input: BxCxT, i.e. (batch_size, input_size, timesteps)
        Output: BxCxT, i.e. (batch_size, input_size, timesteps)

    Attributes:
        weight: the learnable weights of the module of shape
            `(num_heads, 1, kernel_size)`
        bias: the learnable bias of the module of shape `(input_size)`
    '''

    def __init__(self, input_size, kernel_size=1, padding=0, num_heads=1,
                 weight_softmax=False, bias=False, weight_dropout=0.):
        super().__init__()
        self.input_size = input_size
        self.kernel_size = kernel_size
        self.num_heads = num_heads
        self.padding = padding
        self.weight_softmax = weight_softmax
        self.weight = nn.Parameter(torch.Tensor(num_heads, 1, kernel_size))

        if bias:
            self.bias = nn.Parameter(torch.Tensor(input_size))
        else:
            self.bias = None
        self.weight_dropout = weight_dropout
        self.reset_parameters()

    def reset_parameters(self):
        nn.init.xavier_uniform_(self.weight)
        if self.bias is not None:
            nn.init.constant_(self.bias, 0.)

    def forward(self, input):
        '''
        input size: B x C x T
        output size: B x C x T
        '''
        B, C, T = input.size()
        H = self.num_heads

        weight = self.weight
        if self.weight_softmax:
            weight = F.softmax(weight, dim=-1)

        weight = F.dropout(weight, self.weight_dropout, training=self.training)
        # Merge every C/H entries into the batch dimension (C = self.input_size)
        # B x C x T -> (B * C/H) x H x T
        # One can also expand the weight to C x 1 x K by a factor of C/H
        # and do not reshape the input instead, which is slow though
        input = input.view(-1, H, T)
        output = F.conv1d(input, weight, padding=self.padding, groups=self.num_heads)
        output = output.view(B, C, T)
        if self.bias is not None:
            output = output + self.bias.view(1, -1, 1)

        return output


@with_incremental_state
class LightweightConv1dTBC(nn.Module):
    '''Lightweight Convolution assuming the input is TxBxC
    Args:
        input_size: # of channels of the input
        kernel_size: convolution channels
        padding_l: padding to the left when using "same" padding
        num_heads: number of heads used. The weight is of shape (num_heads, 1, kernel_size)
        weight_dropout: the drop rate of the DropConnect to drop the weight
        weight_softmax: normalize the weight with softmax before the convolution
        bias: use bias

    Shape:
        Input: TxBxC, i.e. (timesteps, batch_size, input_size)
        Output: TxBxC, i.e. (timesteps, batch_size, input_size)

    Attributes:
        weight: the learnable weights of the module of shape
            `(num_heads, 1, kernel_size)`
        bias:   the learnable bias of the module of shape `(input_size)`
    '''
    def __init__(self, input_size, kernel_size=1, padding_l=None, num_heads=1,
                 weight_dropout=0., weight_softmax=False, bias=False):
        super().__init__()
        self.input_size = input_size
        self.kernel_size = kernel_size
        self.padding_l = padding_l
        self.num_heads = num_heads
        self.weight_dropout = weight_dropout
        self.weight_softmax = weight_softmax

        self.weight = nn.Parameter(torch.Tensor(num_heads, 1, kernel_size))
        if bias:
            self.bias = nn.Parameter(torch.Tensor(input_size))
        else:
            self.bias = None

        self.reset_parameters()
        self.onnx_trace = False

    def reset_parameters(self):
        nn.init.xavier_uniform_(self.weight)
        if self.bias is not None:
            nn.init.constant_(self.bias, 0.)

    def forward(self, x, incremental_state=None, unfold=False):
        '''Assuming the input, x, of the shape T x B x C and producing an output in the shape T x B x C
        args:
            x: Input of shape T x B x C, i.e. (timesteps, batch_size, input_size)
            incremental_state: A dict to keep the state
            unfold: unfold the input or not. If not, we use the matrix trick instead
        '''
        unfold = unfold or (incremental_state is not None)

        if unfold:
            output = self._forward_unfolded(x, incremental_state)
        else:
            output = self._forward_expanded(x, incremental_state)

        if self.bias is not None:
            output = output + self.bias.view(1, 1, -1)
        return output

    def prepare_for_onnx_export_(self):
        self.onnx_trace = True

    def _forward_unfolded(self, x, incremental_state):
        '''The conventional implementation of convolutions.
        Unfolding the input by having a window shifting to the right.'''
        T, B, C = x.size()
        K, H = self.kernel_size, self.num_heads
        R = C // H
        assert R * H == C == self.input_size

        weight = self.weight.view(H, K)
        if incremental_state is not None:
            input_buffer = self._get_input_buffer(incremental_state)
            if input_buffer is None:
                input_buffer = x.new()
            x_unfold = torch.cat([input_buffer, x.unsqueeze(3)], dim=3)
            if self.kernel_size > 1:
                self._set_input_buffer(incremental_state, x_unfold[:, :, :, -self.kernel_size+1:])
            x_unfold = x_unfold.view(T*B*H, R, -1)
        else:
            # unfold the input: T x B x C --> T' x B x C x K
            x_unfold = unfold1d(x, self.kernel_size, self.padding_l, 0)
            x_unfold = x_unfold.view(T*B*H, R, K)

        if self.weight_softmax:
            weight = utils.softmax(weight, dim=1, onnx_trace=self.onnx_trace).type_as(weight)

        if incremental_state is not None:
            weight = weight[:, -x_unfold.size(2):]
            K = weight.size(1)

        weight = weight.view(1, H, K).expand(T*B, H, K).contiguous().view(T*B*H, K, 1)

        weight = F.dropout(weight, self.weight_dropout, training=self.training)
        output = torch.bmm(x_unfold, weight)  # T*B*H x R x 1
        output = output.view(T, B, C)
        return output

    def _forward_expanded(self, x, incremental_state):
        '''Turn the convolution filters into band matrices and do matrix multiplication.
        This is faster when the sequence is short, but less memory efficient.
        This is not used in the decoder during inference.
        '''
        T, B, C = x.size()
        K, H = self.kernel_size, self.num_heads
        R = C // H
        assert R * H == C == self.input_size

        weight = self.weight.view(H, K)
        if self.weight_softmax:
            weight = utils.softmax(weight, dim=1, onnx_trace=self.onnx_trace).type_as(weight)
        weight = weight.view(1, H, K).expand(T*B, H, K).contiguous()
        weight = weight.view(T, B*H, K).transpose(0, 1)

        x = x.view(T, B*H, R).transpose(0, 1)
        P = self.padding_l
        if K > T and P == K-1:
            weight = weight.narrow(2, K-T, T)
            K, P = T, T-1
        # turn the convolution filters into band matrices
        weight_expanded = weight.new_zeros(B*H, T, T+K-1, requires_grad=False)
        weight_expanded.as_strided((B*H, T, K), (T*(T+K-1), T+K, 1)).copy_(weight)
        weight_expanded = weight_expanded.narrow(2, P, T)
        weight_expanded = F.dropout(weight_expanded, self.weight_dropout, training=self.training)

        output = torch.bmm(weight_expanded, x)
        output = output.transpose(0, 1).contiguous().view(T, B, C)
        return output

    def reorder_incremental_state(self, incremental_state, new_order):
        input_buffer = self._get_input_buffer(incremental_state)
        if input_buffer is not None:
            input_buffer = input_buffer.index_select(1, new_order)
            self._set_input_buffer(incremental_state, input_buffer)

    def _get_input_buffer(self, incremental_state):
        return utils.get_incremental_state(self, incremental_state, 'input_buffer')

    def _set_input_buffer(self, incremental_state, new_buffer):
        return utils.set_incremental_state(self, incremental_state, 'input_buffer', new_buffer)

    def extra_repr(self):
        s = '{}, kernel_size={}, padding_l={}, num_heads={}, weight_softmax={}, bias={}'.format(
            self.input_size, self.kernel_size, self.padding_l,
            self.num_heads, self.weight_softmax, self.bias is not None
        )
        if self.weight_dropout > 0.:
            s += ', weight_dropout={}'.format(self.weight_dropout)
        return s
