# Supplementary material
Source: ML conference proceedings conference paper supplement (https://proceedings.neurips.cc/paper_files/paper/2022/hash/35f805e65c77652efa731edc10c8e3a6-Abstract.html)
Supplement: Supplementary file 1 [file 35f805e65c77652efa731edc10c8e3a6-Supplemental-Conference.zip › Supplementary Material/code/fairseq/modules/linearized_convolution.py]

# Copyright (c) Facebook, Inc. and its affiliates.
#
# This source code is licensed under the MIT license found in the
# LICENSE file in the root directory of this source tree.

import torch
import torch.nn.functional as F

from fairseq import utils
from .conv_tbc import ConvTBC
from fairseq.incremental_decoding_utils import with_incremental_state


@with_incremental_state
class LinearizedConvolution(ConvTBC):
    """An optimized version of nn.Conv1d.

    At training time, this module uses ConvTBC, which is an optimized version
    of Conv1d. At inference time, it optimizes incremental generation (i.e.,
    one time step at a time) by replacing the convolutions with linear layers.
    Note that the input order changes from training to inference.
    """

    def __init__(self, in_channels, out_channels, kernel_size, **kwargs):
        super().__init__(in_channels, out_channels, kernel_size, **kwargs)
        self._linearized_weight = None
        self.register_backward_hook(self._clear_linearized_weight)

    def forward(self, input, incremental_state=None):
        """
        Args:
            incremental_state: Used to buffer signal; if not None, then input is
                expected to contain a single frame. If the input order changes
                between time steps, call reorder_incremental_state.
        Input:
            Time x Batch x Channel during training
            Batch x Time x Channel during inference
        """
        if incremental_state is None:
            output = super().forward(input)
            if self.kernel_size[0] > 1 and self.padding[0] > 0:
                # remove future timesteps added by padding
                output = output[:-self.padding[0], :, :]
            return output

        # reshape weight
        weight = self._get_linearized_weight()
        kw = self.kernel_size[0]

        bsz = input.size(0)  # input: bsz x len x dim
        if kw > 1:
            input = input.data
            input_buffer = self._get_input_buffer(incremental_state)
            if input_buffer is None:
                input_buffer = input.new(bsz, kw, input.size(2)).zero_()
                self._set_input_buffer(incremental_state, input_buffer)
            else:
                # shift buffer
                input_buffer[:, :-1, :] = input_buffer[:, 1:, :].clone()
            # append next input
            input_buffer[:, -1, :] = input[:, -1, :]
            input = input_buffer
        with torch.no_grad():
            output = F.linear(input.view(bsz, -1), weight, self.bias)
        return output.view(bsz, 1, -1)

    def reorder_incremental_state(self, incremental_state, new_order):
        input_buffer = self._get_input_buffer(incremental_state)
        if input_buffer is not None:
            input_buffer = input_buffer.index_select(0, new_order)
            self._set_input_buffer(incremental_state, input_buffer)

    def _get_input_buffer(self, incremental_state):
        return utils.get_incremental_state(self, incremental_state, 'input_buffer')

    def _set_input_buffer(self, incremental_state, new_buffer):
        return utils.set_incremental_state(self, incremental_state, 'input_buffer', new_buffer)

    def _get_linearized_weight(self):
        if self._linearized_weight is None:
            kw = self.kernel_size[0]
            weight = self.weight.transpose(2, 1).transpose(1, 0).contiguous()
            assert weight.size() == (self.out_channels, kw, self.in_channels)
            self._linearized_weight = torch.nn.Parameter(weight.view(self.out_channels, -1))
        return self._linearized_weight

    def _clear_linearized_weight(self, *args):
        self._linearized_weight = None
