# Supplementary material
Source: ML conference proceedings conference paper supplement (https://proceedings.neurips.cc/paper_files/paper/2022/hash/35f805e65c77652efa731edc10c8e3a6-Abstract.html)
Supplement: Supplementary file 1 [file 35f805e65c77652efa731edc10c8e3a6-Supplemental-Conference.zip › Supplementary Material/code/fairseq/modules/logsumexp_moe.py]

# Copyright (c) Facebook, Inc. and its affiliates.
#
# This source code is licensed under the MIT license found in the
# LICENSE file in the root directory of this source tree.

import torch


class LogSumExpMoE(torch.autograd.Function):
    """Standard LogSumExp forward pass, but use *posterior* for the backward.

    See `"Mixture Models for Diverse Machine Translation: Tricks of the Trade"
    (Shen et al., 2019) <https://arxiv.org/abs/1902.07816>`_.
    """

    @staticmethod
    def forward(ctx, logp, posterior, dim=-1):
        ctx.save_for_backward(posterior)
        ctx.dim = dim
        return torch.logsumexp(logp, dim=dim)

    @staticmethod
    def backward(ctx, grad_output):
        posterior, = ctx.saved_tensors
        grad_logp = grad_output.unsqueeze(ctx.dim) * posterior
        return grad_logp, None, None
