# Supplementary material
Source: ML conference proceedings conference paper supplement (https://proceedings.neurips.cc/paper_files/paper/2022/hash/35f805e65c77652efa731edc10c8e3a6-Abstract.html)
Supplement: Supplementary file 1 [file 35f805e65c77652efa731edc10c8e3a6-Supplemental-Conference.zip › Supplementary Material/code/fairseq/modules/sinusoidal_positional_embedding.py]

# Copyright (c) Facebook, Inc. and its affiliates.
#
# This source code is licensed under the MIT license found in the
# LICENSE file in the root directory of this source tree.

import math
from typing import Any, Optional

import torch
import torch.onnx.operators
from fairseq import utils
from torch import Tensor, nn


class SinusoidalPositionalEmbedding(nn.Module):
    """This module produces sinusoidal positional embeddings of any length.

    Padding symbols are ignored.
    """

    def __init__(self, embedding_dim, padding_idx, init_size=1024):
        super().__init__()
        self.embedding_dim = embedding_dim
        self.padding_idx = padding_idx
        self.weights = SinusoidalPositionalEmbedding.get_embedding(
            init_size, embedding_dim, padding_idx
        )
        self.onnx_trace = False
        self.register_buffer("_float_tensor", torch.FloatTensor(1))
        self.max_positions = int(1e5)

    def prepare_for_onnx_export_(self):
        self.onnx_trace = True

    @staticmethod
    def get_embedding(
        num_embeddings: int, embedding_dim: int, padding_idx: Optional[int] = None
    ):
        """Build sinusoidal embeddings.

        This matches the implementation in tensor2tensor, but differs slightly
        from the description in Section 3.5 of "Attention Is All You Need".
        """
        half_dim = embedding_dim // 2
        emb = math.log(10000) / (half_dim - 1)
        emb = torch.exp(torch.arange(half_dim, dtype=torch.float) * -emb)
        emb = torch.arange(num_embeddings, dtype=torch.float).unsqueeze(
            1
        ) * emb.unsqueeze(0)
        emb = torch.cat([torch.sin(emb), torch.cos(emb)], dim=1).view(
            num_embeddings, -1
        )
        if embedding_dim % 2 == 1:
            # zero pad
            emb = torch.cat([emb, torch.zeros(num_embeddings, 1)], dim=1)
        if padding_idx is not None:
            emb[padding_idx, :] = 0
        return emb

    def forward(
        self,
        input,
        incremental_state: Optional[Any] = None,
        timestep: Optional[Tensor] = None,
        positions: Optional[Any] = None,
    ):
        """Input is expected to be of size [bsz x seqlen]."""
        bspair = torch.onnx.operators.shape_as_tensor(input)
        bsz, seq_len = bspair[0], bspair[1]
        max_pos = self.padding_idx + 1 + seq_len
        if self.weights is None or max_pos > self.weights.size(0):
            # recompute/expand embeddings if needed
            self.weights = SinusoidalPositionalEmbedding.get_embedding(
                max_pos, self.embedding_dim, self.padding_idx
            )
        self.weights = self.weights.to(self._float_tensor)

        if incremental_state is not None:
            # positions is the same for every token when decoding a single step
            pos = timestep.view(-1)[0] + 1 if timestep is not None else seq_len
            if self.onnx_trace:
                return (
                    self.weights.index_select(index=self.padding_idx + pos, dim=0)
                    .unsqueeze(1)
                    .repeat(bsz, 1, 1)
                )
            return self.weights[self.padding_idx + pos, :].expand(bsz, 1, -1)

        positions = utils.make_positions(
            input, self.padding_idx, onnx_trace=self.onnx_trace
        )
        if self.onnx_trace:
            flat_embeddings = self.weights.detach().index_select(0, positions.view(-1))
            embedding_shape = torch.cat(
                (bsz.view(1), seq_len.view(1), torch.tensor([-1], dtype=torch.long))
            )
            embeddings = torch.onnx.operators.reshape_from_tensor_shape(
                flat_embeddings, embedding_shape
            )
            return embeddings
        return (
            self.weights.index_select(0, positions.view(-1))
            .view(bsz, seq_len, -1)
            .detach()
        )
