# Supplementary material
Source: ML conference proceedings conference paper supplement (https://proceedings.neurips.cc/paper_files/paper/2022/hash/35f805e65c77652efa731edc10c8e3a6-Abstract.html)
Supplement: Supplementary file 1 [file 35f805e65c77652efa731edc10c8e3a6-Supplemental-Conference.zip › Supplementary Material/code/fairseq/modules/sparse_transformer_sentence_encoder_layer.py]

# Copyright (c) Facebook, Inc. and its affiliates.
#
# This source code is licensed under the MIT license found in the
# LICENSE file in the root directory of this source tree.

from fairseq.modules import TransformerSentenceEncoderLayer
from fairseq.modules.sparse_multihead_attention import SparseMultiheadAttention


class SparseTransformerSentenceEncoderLayer(TransformerSentenceEncoderLayer):
    """
    Implements a Sprase Transformer Encoder Layer (see SparseMultiheadAttention)
    """

    def __init__(
        self,
        embedding_dim: int = 768,
        ffn_embedding_dim: int = 3072,
        num_attention_heads: int = 8,
        dropout: float = 0.1,
        attention_dropout: float = 0.1,
        activation_dropout: float = 0.1,
        activation_fn: str = 'relu',
        add_bias_kv: bool = False,
        add_zero_attn: bool = False,
        export: bool = False,
        is_bidirectional: bool = True,
        stride: int = 32,
        expressivity: int = 8,
    ) -> None:

        super().__init__(
            embedding_dim, ffn_embedding_dim, num_attention_heads, dropout,
            attention_dropout, activation_dropout, activation_fn, add_bias_kv,
            add_zero_attn, export
        )

        self.self_attn = SparseMultiheadAttention(
            self.embedding_dim,
            num_attention_heads,
            dropout=attention_dropout,
            add_bias_kv=add_bias_kv,
            add_zero_attn=add_zero_attn,
            self_attention=True,
            is_bidirectional=is_bidirectional,
            stride=stride,
            expressivity=expressivity,
        )
