# Supplementary material
Source: ML conference proceedings conference paper supplement (https://proceedings.neurips.cc/paper_files/paper/2022/hash/35f805e65c77652efa731edc10c8e3a6-Abstract.html)
Supplement: Supplementary file 1 [file 35f805e65c77652efa731edc10c8e3a6-Supplemental-Conference.zip › Supplementary Material/code/fairseq/modules/transformer_layer.py]

# Copyright (c) Facebook, Inc. and its affiliates.
#
# This source code is licensed under the MIT license found in the
# LICENSE file in the root directory of this source tree.

from typing import Dict, List, Optional

import torch
import torch.nn as nn
import torch.nn.functional as F
from fairseq import utils
from fairseq.modules import LayerNorm, MultiheadAttention
from torch import Tensor


class TransformerEncoderLayer(nn.Module):
    """Encoder layer block.

    In the original paper each operation (multi-head attention or FFN) is
    postprocessed with: `dropout -> add residual -> layernorm`. In the
    tensor2tensor code they suggest that learning is more robust when
    preprocessing each layer with layernorm and postprocessing with:
    `dropout -> add residual`. We default to the approach in the paper, but the
    tensor2tensor approach can be enabled by setting
    *args.encoder_normalize_before* to ``True``.

    Args:
        args (argparse.Namespace): parsed command-line arguments
    """

    def __init__(self, args):
        super().__init__()
        self.embed_dim = args.encoder_embed_dim
        self.self_attn = MultiheadAttention(
            self.embed_dim,
            args.encoder_attention_heads,
            dropout=args.attention_dropout,
            self_attention=True,
        )
        self.self_attn_layer_norm = LayerNorm(self.embed_dim)
        self.dropout = args.dropout
        self.activation_fn = utils.get_activation_fn(
            activation=getattr(args, "activation_fn", "relu")
        )
        self.activation_dropout = getattr(args, "activation_dropout", 0)
        if self.activation_dropout == 0:
            # for backwards compatibility with models that use args.relu_dropout
            self.activation_dropout = getattr(args, "relu_dropout", 0)
        self.normalize_before = args.encoder_normalize_before
        self.fc1 = Linear(self.embed_dim, args.encoder_ffn_embed_dim)
        self.fc2 = Linear(args.encoder_ffn_embed_dim, self.embed_dim)
        self.final_layer_norm = LayerNorm(self.embed_dim)

    def upgrade_state_dict_named(self, state_dict, name):
        """
        Rename layer norm states from `...layer_norms.0.weight` to
        `...self_attn_layer_norm.weight` and `...layer_norms.1.weight` to
        `...final_layer_norm.weight`
        """
        layer_norm_map = {"0": "self_attn_layer_norm", "1": "final_layer_norm"}
        for old, new in layer_norm_map.items():
            for m in ("weight", "bias"):
                k = "{}.layer_norms.{}.{}".format(name, old, m)
                if k in state_dict:
                    state_dict["{}.{}.{}".format(name, new, m)] = state_dict[k]
                    del state_dict[k]

    def forward(self, x, encoder_padding_mask, attn_mask: Optional[Tensor] = None):
        """
        Args:
            x (Tensor): input to the layer of shape `(seq_len, batch, embed_dim)`
            encoder_padding_mask (ByteTensor): binary ByteTensor of shape
                `(batch, src_len)` where padding elements are indicated by ``1``.
            attn_mask (ByteTensor): binary tensor of shape (T_tgt, T_src), where
            T_tgt is the length of query, while T_src is the length of key,
            though here both query and key is x here,
            attn_mask[t_tgt, t_src] = 1 means when calculating embedding
            for t_tgt, t_src is excluded (or masked out), =0 means it is
            included in attention

        Returns:
            encoded output of shape `(seq_len, batch, embed_dim)`
        """
        residual = x
        if self.normalize_before:
            x = self.self_attn_layer_norm(x)
        if attn_mask is not None:
            attn_mask = attn_mask.masked_fill(attn_mask.to(torch.bool), -1e8)
        # anything in original attn_mask = 1, becomes -1e8
        # anything in original attn_mask = 0, becomes 0
        # Note that we cannot use -inf here, because at some edge cases,
        # the attention weight (before softmax) for some padded element in query
        # will become -inf, which results in NaN in model parameters
        # TODO: to formally solve this problem, we need to change fairseq's
        # MultiheadAttention. We will do this later on.
        x, _ = self.self_attn(
            query=x,
            key=x,
            value=x,
            key_padding_mask=encoder_padding_mask,
            attn_mask=attn_mask,
        )
        x = F.dropout(x, p=self.dropout, training=self.training)
        x = residual + x
        if not self.normalize_before:
            x = self.self_attn_layer_norm(x)

        residual = x
        if self.normalize_before:
            x = self.final_layer_norm(x)
        x = self.activation_fn(self.fc1(x))
        x = F.dropout(x, p=float(self.activation_dropout), training=self.training)
        x = self.fc2(x)
        x = F.dropout(x, p=self.dropout, training=self.training)
        x = residual + x
        if not self.normalize_before:
            x = self.final_layer_norm(x)
        return x


class TransformerDecoderLayer(nn.Module):
    """Decoder layer block.

    In the original paper each operation (multi-head attention, encoder
    attention or FFN) is postprocessed with: `dropout -> add residual ->
    layernorm`. In the tensor2tensor code they suggest that learning is more
    robust when preprocessing each layer with layernorm and postprocessing with:
    `dropout -> add residual`. We default to the approach in the paper, but the
    tensor2tensor approach can be enabled by setting
    *args.decoder_normalize_before* to ``True``.

    Args:
        args (argparse.Namespace): parsed command-line arguments
        no_encoder_attn (bool, optional): whether to attend to encoder outputs
            (default: False).
    """

    def __init__(
        self, args, no_encoder_attn=False, add_bias_kv=False, add_zero_attn=False
    ):
        super().__init__()
        self.embed_dim = args.decoder_embed_dim
        self.cross_self_attention = getattr(args, "cross_self_attention", False)
        self.self_attn = MultiheadAttention(
            embed_dim=self.embed_dim,
            num_heads=args.decoder_attention_heads,
            dropout=args.attention_dropout,
            add_bias_kv=add_bias_kv,
            add_zero_attn=add_zero_attn,
            self_attention=not self.cross_self_attention,
        )
        self.dropout = args.dropout
        self.activation_fn = utils.get_activation_fn(
            activation=getattr(args, "activation_fn", "relu")
        )
        self.activation_dropout = getattr(args, "activation_dropout", 0)
        if self.activation_dropout == 0:
            # for backwards compatibility with models that use args.relu_dropout
            self.activation_dropout = getattr(args, "relu_dropout", 0)
        self.normalize_before = args.decoder_normalize_before

        # use layerNorm rather than FusedLayerNorm for exporting.
        # char_inputs can be used to determint this.
        # TODO  remove this once we update apex with the fix
        export = getattr(args, "char_inputs", False)
        self.self_attn_layer_norm = LayerNorm(self.embed_dim, export=export)

        if no_encoder_attn:
            self.encoder_attn = None
            self.encoder_attn_layer_norm = None
        else:
            self.encoder_attn = MultiheadAttention(
                self.embed_dim,
                args.decoder_attention_heads,
                kdim=getattr(args, "encoder_embed_dim", None),
                vdim=getattr(args, "encoder_embed_dim", None),
                dropout=args.attention_dropout,
                encoder_decoder_attention=True,
            )
            self.encoder_attn_layer_norm = LayerNorm(self.embed_dim, export=export)

        self.fc1 = Linear(self.embed_dim, args.decoder_ffn_embed_dim)
        self.fc2 = Linear(args.decoder_ffn_embed_dim, self.embed_dim)

        self.final_layer_norm = LayerNorm(self.embed_dim, export=export)
        self.need_attn = True

        self.onnx_trace = False

    def prepare_for_onnx_export_(self):
        self.onnx_trace = True

    def forward(
        self,
        x,
        encoder_out: Optional[torch.Tensor] = None,
        encoder_padding_mask: Optional[torch.Tensor] = None,
        incremental_state: Optional[Dict[str, Dict[str, Optional[Tensor]]]] = None,
        prev_self_attn_state: Optional[List[torch.Tensor]] = None,
        prev_attn_state: Optional[List[torch.Tensor]] = None,
        self_attn_mask: Optional[torch.Tensor] = None,
        self_attn_padding_mask: Optional[torch.Tensor] = None,
        need_attn: bool = False,
        need_head_weights: bool = False,
    ):
        """
        Args:
            x (Tensor): input to the layer of shape `(seq_len, batch, embed_dim)`
            encoder_padding_mask (ByteTensor, optional): binary
                ByteTensor of shape `(batch, src_len)` where padding
                elements are indicated by ``1``.
            need_attn (bool, optional): return attention weights
            need_head_weights (bool, optional): return attention weights
                for each head (default: return average over heads).

        Returns:
            encoded output of shape `(seq_len, batch, embed_dim)`
        """
        if need_head_weights:
            need_attn = True

        residual = x
        if self.normalize_before:
            x = self.self_attn_layer_norm(x)
        if prev_self_attn_state is not None:
            prev_key, prev_value = prev_self_attn_state[:2]
            saved_state: Dict[str, Optional[Tensor]] = {
                "prev_key": prev_key,
                "prev_value": prev_value,
            }
            if len(prev_self_attn_state) >= 3:
                saved_state["prev_key_padding_mask"] = prev_self_attn_state[2]
            assert incremental_state is not None
            self.self_attn._set_input_buffer(incremental_state, saved_state)
        _self_attn_input_buffer = self.self_attn._get_input_buffer(incremental_state)
        if self.cross_self_attention and not (
            incremental_state is not None
            and _self_attn_input_buffer is not None
            and "prev_key" in _self_attn_input_buffer
        ):
            if self_attn_mask is not None:
                assert encoder_out is not None
                self_attn_mask = torch.cat(
                    (x.new_zeros(x.size(0), encoder_out.size(0)), self_attn_mask), dim=1
                )
            if self_attn_padding_mask is not None:
                if encoder_padding_mask is None:
                    assert encoder_out is not None
                    encoder_padding_mask = self_attn_padding_mask.new_zeros(
                        encoder_out.size(1), encoder_out.size(0)
                    )
                self_attn_padding_mask = torch.cat(
                    (encoder_padding_mask, self_attn_padding_mask), dim=1
                )
            assert encoder_out is not None
            y = torch.cat((encoder_out, x), dim=0)
        else:
            y = x

        x, attn = self.self_attn(
            query=x,
            key=y,
            value=y,
            key_padding_mask=self_attn_padding_mask,
            incremental_state=incremental_state,
            need_weights=False,
            attn_mask=self_attn_mask,
        )
        x = F.dropout(x, p=self.dropout, training=self.training)
        x = residual + x
        if not self.normalize_before:
            x = self.self_attn_layer_norm(x)

        if self.encoder_attn is not None:
            residual = x
            if self.normalize_before:
                x = self.encoder_attn_layer_norm(x)
            if prev_attn_state is not None:
                prev_key, prev_value = prev_attn_state[:2]
                saved_state: Dict[str, Optional[Tensor]] = {
                    "prev_key": prev_key,
                    "prev_value": prev_value,
                }
                if len(prev_attn_state) >= 3:
                    saved_state["prev_key_padding_mask"] = prev_attn_state[2]
                assert incremental_state is not None
                self.encoder_attn._set_input_buffer(incremental_state, saved_state)

            x, attn = self.encoder_attn(
                query=x,
                key=encoder_out,
                value=encoder_out,
                key_padding_mask=encoder_padding_mask,
                incremental_state=incremental_state,
                static_kv=True,
                need_weights=need_attn or (not self.training and self.need_attn),
                need_head_weights=need_head_weights,
            )
            x = F.dropout(x, p=self.dropout, training=self.training)
            x = residual + x
            if not self.normalize_before:
                x = self.encoder_attn_layer_norm(x)

        residual = x
        if self.normalize_before:
            x = self.final_layer_norm(x)
        x = self.activation_fn(self.fc1(x))
        x = F.dropout(x, p=float(self.activation_dropout), training=self.training)
        x = self.fc2(x)
        x = F.dropout(x, p=self.dropout, training=self.training)
        x = residual + x
        if not self.normalize_before:
            x = self.final_layer_norm(x)
        if self.onnx_trace and incremental_state is not None:
            saved_state = self.self_attn._get_input_buffer(incremental_state)
            assert saved_state is not None
            if self_attn_padding_mask is not None:
                self_attn_state = [
                    saved_state["prev_key"],
                    saved_state["prev_value"],
                    saved_state["prev_key_padding_mask"],
                ]
            else:
                self_attn_state = [saved_state["prev_key"], saved_state["prev_value"]]
            return x, attn, self_attn_state
        return x, attn, None

    def make_generation_fast_(self, need_attn: bool = False, **kwargs):
        self.need_attn = need_attn


def Linear(in_features, out_features, bias=True):
    m = nn.Linear(in_features, out_features, bias)
    nn.init.xavier_uniform_(m.weight)
    if bias:
        nn.init.constant_(m.bias, 0.0)
    return m
