# Supplementary material
Source: ML conference proceedings conference paper supplement (https://proceedings.neurips.cc/paper_files/paper/2022/hash/35f805e65c77652efa731edc10c8e3a6-Abstract.html)
Supplement: Supplementary file 1 [file 35f805e65c77652efa731edc10c8e3a6-Supplemental-Conference.zip › Supplementary Material/code/fairseq/modules/unfold.py]

# Copyright (c) Facebook, Inc. and its affiliates.
#
# This source code is licensed under the MIT license found in the
# LICENSE file in the root directory of this source tree.

import torch.nn.functional as F


def unfold1d(x, kernel_size, padding_l, pad_value=0):
    '''unfold T x B x C to T x B x C x K'''
    if kernel_size > 1:
        T, B, C = x.size()
        x = F.pad(x, (0, 0, 0, 0, padding_l, kernel_size - 1 - padding_l), value=pad_value)
        x = x.as_strided((T, B, C, kernel_size), (B*C, C, 1, B*C))
    else:
        x = x.unsqueeze(3)
    return x
