# Supplementary material
Source: ML conference proceedings conference paper supplement (https://proceedings.neurips.cc/paper_files/paper/2022/hash/35f805e65c77652efa731edc10c8e3a6-Abstract.html)
Supplement: Supplementary file 1 [file 35f805e65c77652efa731edc10c8e3a6-Supplemental-Conference.zip › Supplementary Material/code/fairseq/optim/__init__.py]

# Copyright (c) Facebook, Inc. and its affiliates.
#
# This source code is licensed under the MIT license found in the
# LICENSE file in the root directory of this source tree.

import importlib
import os

from fairseq import registry
from fairseq.optim.fairseq_optimizer import FairseqOptimizer
from fairseq.optim.fp16_optimizer import FP16Optimizer, MemoryEfficientFP16Optimizer
from fairseq.optim.bmuf import FairseqBMUF  # noqa


__all__ = [
    'FairseqOptimizer',
    'FP16Optimizer',
    'MemoryEfficientFP16Optimizer',
]


build_optimizer, register_optimizer, OPTIMIZER_REGISTRY = registry.setup_registry(
    '--optimizer',
    base_class=FairseqOptimizer,
    default='nag',
)


# automatically import any Python files in the optim/ directory
for file in os.listdir(os.path.dirname(__file__)):
    if file.endswith('.py') and not file.startswith('_'):
        module = file[:file.find('.py')]
        importlib.import_module('fairseq.optim.' + module)
