# Supplementary material
Source: ML conference proceedings conference paper supplement (https://proceedings.neurips.cc/paper_files/paper/2022/hash/35f805e65c77652efa731edc10c8e3a6-Abstract.html)
Supplement: Supplementary file 1 [file 35f805e65c77652efa731edc10c8e3a6-Supplemental-Conference.zip › Supplementary Material/code/fairseq/optim/adamax.py]

# Copyright (c) Facebook, Inc. and its affiliates.
#
# This source code is licensed under the MIT license found in the
# LICENSE file in the root directory of this source tree.

import torch
import torch.optim

from . import FairseqOptimizer, register_optimizer


@register_optimizer('adamax')
class FairseqAdamax(FairseqOptimizer):
    def __init__(self, args, params):
        super().__init__(args)
        self._optimizer = Adamax(params, **self.optimizer_config)

    @staticmethod
    def add_args(parser):
        """Add optimizer-specific arguments to the parser."""
        # fmt: off
        parser.add_argument('--adamax-betas', default='(0.9, 0.999)', metavar='B',
                            help='betas for Adam optimizer')
        parser.add_argument('--adamax-eps', type=float, default=1e-8, metavar='D',
                            help='epsilon for Adam optimizer')
        parser.add_argument('--weight-decay', '--wd', default=0.0, type=float, metavar='WD',
                            help='weight decay')
        parser.add_argument('--no-bias-correction', default=False, action='store_true',
                            help='disable bias correction')
        # fmt: on

    @property
    def optimizer_config(self):
        """
        Return a kwarg dictionary that will be used to override optimizer
        args stored in checkpoints. This allows us to load a checkpoint and
        resume training using a different set of optimizer args, e.g., with a
        different learning rate.
        """
        return {
            'lr': self.args.lr[0],
            'betas': eval(self.args.adamax_betas),
            'eps': self.args.adamax_eps,
            'weight_decay': self.args.weight_decay,
            'bias_correction': not self.args.no_bias_correction,
        }


class Adamax(torch.optim.Optimizer):
    """Implements Adamax algorithm (a variant of Adam based on infinity norm).

    It has been proposed in `Adam: A Method for Stochastic Optimization`__.

    Compared to the version in PyTorch, this version implements a fix for weight decay.

    Arguments:
        params (iterable): iterable of parameters to optimize or dicts defining
            parameter groups
        lr (float, optional): learning rate (default: 2e-3)
        betas (Tuple[float, float], optional): coefficients used for computing
            running averages of gradient and its square
        eps (float, optional): term added to the denominator to improve
            numerical stability (default: 1e-8)
        weight_decay (float, optional): weight decay (L2 penalty) (default: 0)
        bias_correction (bool, optional): enable bias correction (default: True)

    __ https://arxiv.org/abs/1412.6980
    """

    def __init__(self, params, lr=2e-3, betas=(0.9, 0.999), eps=1e-8,
                 weight_decay=0, bias_correction=True):
        if not 0.0 <= lr:
            raise ValueError("Invalid learning rate: {}".format(lr))
        if not 0.0 <= eps:
            raise ValueError("Invalid epsilon value: {}".format(eps))
        if not 0.0 <= betas[0] < 1.0:
            raise ValueError("Invalid beta parameter at index 0: {}".format(betas[0]))
        if not 0.0 <= betas[1] < 1.0:
            raise ValueError("Invalid beta parameter at index 1: {}".format(betas[1]))
        if not 0.0 <= weight_decay:
            raise ValueError("Invalid weight_decay value: {}".format(weight_decay))

        defaults = dict(lr=lr, betas=betas, eps=eps, weight_decay=weight_decay,
                        bias_correction=bias_correction)
        super(Adamax, self).__init__(params, defaults)

    @property
    def supports_memory_efficient_fp16(self):
        return True

    @property
    def supports_flat_params(self):
        return True

    def step(self, closure=None):
        """Performs a single optimization step.

        Arguments:
            closure (callable, optional): A closure that reevaluates the model
                and returns the loss.
        """
        loss = None
        if closure is not None:
            loss = closure()

        for group in self.param_groups:
            for p in group['params']:
                if p.grad is None:
                    continue
                grad = p.grad.data.float()
                if grad.is_sparse:
                    raise RuntimeError('Adamax does not support sparse gradients')

                p_data_fp32 = p.data.float()

                state = self.state[p]

                # State initialization
                if len(state) == 0:
                    state['step'] = 0
                    state['exp_avg'] = torch.zeros_like(p_data_fp32)
                    state['exp_inf'] = torch.zeros_like(p_data_fp32)
                else:
                    state['exp_avg'] = state['exp_avg'].type_as(p_data_fp32)
                    state['exp_inf'] = state['exp_inf'].type_as(p_data_fp32)

                exp_avg, exp_inf = state['exp_avg'], state['exp_inf']
                beta1, beta2 = group['betas']
                eps = group['eps']

                state['step'] += 1

                # Update biased first moment estimate.
                exp_avg.mul_(beta1).add_(1 - beta1, grad)

                # Update the exponentially weighted infinity norm.
                torch.max(
                    exp_inf.mul_(beta2),
                    grad.abs_(),
                    out=exp_inf,
                )

                step_size = group['lr']
                if group['bias_correction']:
                    bias_correction = 1 - beta1 ** state['step']
                    step_size /= bias_correction

                if group['weight_decay'] != 0:
                    p_data_fp32.add_(-group['weight_decay'] * group['lr'], p_data_fp32)

                p_data_fp32.addcdiv_(-step_size, exp_avg, exp_inf.add(eps))

                p.data.copy_(p_data_fp32)

        return loss
