# Supplementary material
Source: ML conference proceedings conference paper supplement (https://proceedings.neurips.cc/paper_files/paper/2022/hash/35f805e65c77652efa731edc10c8e3a6-Abstract.html)
Supplement: Supplementary file 1 [file 35f805e65c77652efa731edc10c8e3a6-Supplemental-Conference.zip › Supplementary Material/code/fairseq/optim/fused_adam.py]

# Copyright (c) Facebook, Inc. and its affiliates.
#
# This source code is licensed under the MIT license found in the
# LICENSE file in the root directory of this source tree.

import types

import torch


def get_fused_adam_class():
    """
    Look for the FusedAdam optimizer from apex. We first try to load the
    "contrib" interface, which is a bit faster than the main interface,
    but is technically deprecated.
    """
    try:
        # The "deprecated" interface in recent versions of apex is a bit
        # faster than the main interface, since we don't use the apex
        # optimizer. This can be installed by passing the
        # `--deprecated_fused_adam` option when building apex.
        global fused_adam_cuda
        import importlib
        fused_adam_cuda = importlib.import_module("fused_adam_cuda")
        return FusedAdamV1
    except ImportError:
        try:
            # fallback to the newer interface
            from apex.optimizers import FusedAdam as _FusedAdam  # noqa
            return FusedAdamV2
        except ImportError:
            pass
    return None


class FusedAdamV1(torch.optim.Optimizer):
    """
    Implements Adam algorithm. Currently GPU-only. Requires Apex to be installed via
    ``python setup.py install --cuda_ext --cpp_ext``.

    It has been proposed in `Adam: A Method for Stochastic Optimization`_.

    Compared to the original version in Apex, the fairseq version casts grads
    and params to FP32 internally to support ``--memory-efficient-fp16``.

    Arguments:
        params (iterable): iterable of parameters to optimize or dicts defining
            parameter groups.
        lr (float, optional): learning rate. (default: 1e-3)
        betas (Tuple[float, float], optional): coefficients used for computing
            running averages of gradient and its square. (default: (0.9, 0.999))
        eps (float, optional): term added to the denominator to improve
            numerical stability. (default: 1e-8)
        weight_decay (float, optional): weight decay (L2 penalty) (default: 0)
        amsgrad (boolean, optional): whether to use the AMSGrad variant of this
            algorithm from the paper `On the Convergence of Adam and Beyond`_
            (default: False) NOT SUPPORTED in FusedAdam!
        eps_inside_sqrt (boolean, optional): in the 'update parameters' step,
            adds eps to the bias-corrected second moment estimate before
            evaluating square root instead of adding it to the square root of
            second moment estimate as in the original paper. (default: False)
    .. _Adam: A Method for Stochastic Optimization:
        https://arxiv.org/abs/1412.6980
    .. _On the Convergence of Adam and Beyond:
        https://openreview.net/forum?id=ryQu7f-RZ
    """

    def __init__(self, params,
                 lr=1e-3, bias_correction=True,
                 betas=(0.9, 0.999), eps=1e-8, eps_inside_sqrt=False,
                 weight_decay=0., max_grad_norm=0., amsgrad=False):
        global fused_adam_cuda
        import importlib
        fused_adam_cuda = importlib.import_module("fused_adam_cuda")

        if amsgrad:
            raise RuntimeError('FusedAdam does not support the AMSGrad variant.')
        defaults = {
            'lr': lr,
            'bias_correction': bias_correction,
            'betas': betas,
            'eps': eps,
            'weight_decay': weight_decay,
            'max_grad_norm': max_grad_norm,
        }
        super().__init__(params, defaults)
        self.eps_mode = 0 if eps_inside_sqrt else 1

    @property
    def supports_memory_efficient_fp16(self):
        return True

    @property
    def supports_flat_params(self):
        return True

    def step(self, closure=None, grads=None, scale=1., grad_norms=None):
        """Performs a single optimization step.
        Arguments:
            closure (callable, optional): A closure that reevaluates the model
                and returns the loss.
            grads (list of tensors, optional): weight gradient to use for the
                optimizer update. If gradients have type torch.half, parameters
                are expected to be in type torch.float. (default: None)
            output params (list of tensors, optional): A reduced precision copy
                of the updated weights written out in addition to the regular
                updated weights. Have to be of same type as gradients. (default: None)
            scale (float, optional): factor to divide gradient tensor values
                by before applying to weights. (default: 1)
        """
        loss = None
        if closure is not None:
            loss = closure()

        if grads is None:
            grads_group = [None] * len(self.param_groups)
        # backward compatibility
        # assuming a list/generator of parameter means single group
        elif isinstance(grads, types.GeneratorType):
            grads_group = [grads]
        elif type(grads[0]) != list:
            grads_group = [grads]
        else:
            grads_group = grads

        if grad_norms is None:
            grad_norms = [None]*len(self.param_groups)

        for group, grads_this_group, grad_norm in zip(self.param_groups, grads_group, grad_norms):
            if grads_this_group is None:
                grads_this_group = [None]*len(group['params'])

            # compute combined scale factor for this group
            combined_scale = scale
            if group['max_grad_norm'] > 0:
                # norm is in fact norm*scale
                clip = ((grad_norm / scale) + 1e-6) / group['max_grad_norm']
                if clip > 1:
                    combined_scale = clip * scale

            bias_correction = 1 if group['bias_correction'] else 0

            for p, grad in zip(group['params'], grads_this_group):
                # note: p.grad should not ever be set for correct
                # operation of mixed precision optimizer that sometimes
                # sends None gradients
                if p.grad is None and grad is None:
                    continue
                if grad is None:
                    grad = p.grad.data
                if grad.is_sparse:
                    raise RuntimeError(
                        'FusedAdam does not support sparse gradients, '
                        'please consider SparseAdam instead'
                    )

                p_data_fp32 = p.data.float()

                state = self.state[p]

                # State initialization
                if len(state) == 0:
                    state['step'] = 0
                    # Exponential moving average of gradient values
                    state['exp_avg'] = torch.zeros_like(p_data_fp32)
                    # Exponential moving average of squared gradient values
                    state['exp_avg_sq'] = torch.zeros_like(p_data_fp32)
                else:
                    state['exp_avg'] = state['exp_avg'].type_as(p_data_fp32)
                    state['exp_avg_sq'] = state['exp_avg_sq'].type_as(p_data_fp32)

                exp_avg = state['exp_avg']
                exp_avg_sq = state['exp_avg_sq']
                beta1, beta2 = group['betas']

                state['step'] += 1

                out_p = p.data
                fused_adam_cuda.adam(p_data_fp32,
                                     out_p,
                                     exp_avg,
                                     exp_avg_sq,
                                     grad,
                                     group['lr'],
                                     beta1,
                                     beta2,
                                     group['eps'],
                                     combined_scale,
                                     state['step'],
                                     self.eps_mode,
                                     bias_correction,
                                     group['weight_decay'])

        return loss


try:
    from apex.optimizers import FusedAdam
    from apex.multi_tensor_apply import multi_tensor_applier

    class FusedAdamV2(FusedAdam):
        """
        Compared to the original version in Apex, the fairseq version casts grads
        and params to FP32 internally to support ``--memory-efficient-fp16``.
        """

        def __init__(self, *args, **kwargs):
            super().__init__(*args, **kwargs)
            if not hasattr(self, 'multi_tensor_adam'):
                raise Exception('Apex installation is outdated. Please install an updated version of apex.')

        @property
        def supports_memory_efficient_fp16(self):
            return True

        @property
        def supports_flat_params(self):
            return True

        def step(self, closure=None, grads=None, output_params=None, scale=None, grad_norms=None):
            """Performs a single optimization step."""
            loss = None
            if closure is not None:
                loss = closure()

            for group in self.param_groups:
                bias_correction = 1 if group['bias_correction'] else 0
                beta1, beta2 = group['betas']

                # assume same step across group now to simplify things
                # per parameter step can be easily support by making it tensor, or pass list into kernel
                if 'step' in group:
                    group['step'] += 1
                else:
                    group['step'] = 1

                # create lists for multi-tensor apply
                g_16, p_16, orig_p_16, m_16, v_16 = [], [], [], [], []
                g_32, p_32, m_32, v_32 = [], [], [], []

                for p in group['params']:
                    if p.grad is None:
                        continue
                    if p.grad.data.is_sparse:
                        raise RuntimeError(
                            'FusedAdam does not support sparse gradients, '
                            'please consider SparseAdam instead'
                        )

                    state = self.state[p]
                    # State initialization
                    if len(state) == 0:
                        # Exponential moving average of gradient values
                        state['exp_avg'] = torch.zeros_like(p.data, dtype=torch.float)
                        # Exponential moving average of squared gradient values
                        state['exp_avg_sq'] = torch.zeros_like(p.data, dtype=torch.float)

                    if p.dtype == torch.float16:
                        g_16.append(p.grad.data.float())
                        p_16.append(p.data.float())
                        orig_p_16.append(p.data)
                        m_16.append(state['exp_avg'])
                        v_16.append(state['exp_avg_sq'])
                    elif p.dtype == torch.float32:
                        g_32.append(p.grad.data)
                        p_32.append(p.data)
                        m_32.append(state['exp_avg'])
                        v_32.append(state['exp_avg_sq'])
                    else:
                        raise RuntimeError('FusedAdam only support fp16 and fp32.')

                if(len(g_16) > 0):
                    multi_tensor_applier(self.multi_tensor_adam,
                                         self._dummy_overflow_buf,
                                         [g_16, p_16, m_16, v_16],
                                         group['lr'],
                                         beta1,
                                         beta2,
                                         group['eps'],
                                         group['step'],
                                         self.adam_w_mode,
                                         bias_correction,
                                         group['weight_decay'])
                    for orig_p, p in zip(orig_p_16, p_16):
                        orig_p.copy_(p.data)
                if(len(g_32) > 0):
                    multi_tensor_applier(self.multi_tensor_adam,
                                         self._dummy_overflow_buf,
                                         [g_32, p_32, m_32, v_32],
                                         group['lr'],
                                         beta1,
                                         beta2,
                                         group['eps'],
                                         group['step'],
                                         self.adam_w_mode,
                                         bias_correction,
                                         group['weight_decay'])

            return loss
except ImportError:
    pass
