# Supplementary material
Source: ML conference proceedings conference paper supplement (https://proceedings.neurips.cc/paper_files/paper/2022/hash/35f805e65c77652efa731edc10c8e3a6-Abstract.html)
Supplement: Supplementary file 1 [file 35f805e65c77652efa731edc10c8e3a6-Supplemental-Conference.zip › Supplementary Material/code/fairseq/progress_bar.py]

# Copyright (c) Facebook, Inc. and its affiliates.
#
# This source code is licensed under the MIT license found in the
# LICENSE file in the root directory of this source tree.

"""
Wrapper around various loggers and progress bars (e.g., tqdm).
"""

from collections import OrderedDict
from contextlib import contextmanager
import json
import logging
from numbers import Number
import os
import sys

import torch

from fairseq import distributed_utils
from fairseq.meters import AverageMeter, StopwatchMeter, TimeMeter


logger = logging.getLogger(__name__)


def build_progress_bar(args, iterator, epoch=None, prefix=None, default='tqdm', no_progress_bar='none'):
    if args.log_format is None:
        args.log_format = no_progress_bar if args.no_progress_bar else default

    if args.log_format == 'tqdm' and not sys.stderr.isatty():
        args.log_format = 'simple'

    if args.log_format == 'json':
        bar = json_progress_bar(iterator, epoch, prefix, args.log_interval)
    elif args.log_format == 'none':
        bar = noop_progress_bar(iterator, epoch, prefix)
    elif args.log_format == 'simple':
        bar = simple_progress_bar(iterator, epoch, prefix, args.log_interval)
    elif args.log_format == 'tqdm':
        bar = tqdm_progress_bar(iterator, epoch, prefix)
    else:
        raise ValueError('Unknown log format: {}'.format(args.log_format))

    if args.tensorboard_logdir and distributed_utils.is_master(args):
        try:
            # [FB only] custom wrapper for TensorBoard
            import palaas  # noqa
            from fairseq.fb_tbmf_wrapper import fb_tbmf_wrapper
            bar = fb_tbmf_wrapper(bar, args, args.log_interval)
        except ImportError:
            bar = tensorboard_log_wrapper(bar, args.tensorboard_logdir, args)

    return bar


def format_stat(stat):
    if isinstance(stat, Number):
        stat = '{:g}'.format(stat)
    elif isinstance(stat, AverageMeter):
        stat = '{:.3f}'.format(stat.avg)
    elif isinstance(stat, TimeMeter):
        stat = '{:g}'.format(round(stat.avg))
    elif isinstance(stat, StopwatchMeter):
        stat = '{:g}'.format(round(stat.sum))
    elif torch.is_tensor(stat):
        stat = stat.tolist()
    return stat


class progress_bar(object):
    """Abstract class for progress bars."""
    def __init__(self, iterable, epoch=None, prefix=None):
        self.iterable = iterable
        self.offset = getattr(iterable, 'offset', 0)
        self.epoch = epoch
        self.prefix = ''
        if epoch is not None:
            self.prefix += 'epoch {:03d}'.format(epoch)
        if prefix is not None:
            self.prefix += ' | {}'.format(prefix)

    def __len__(self):
        return len(self.iterable)

    def __enter__(self):
        return self

    def __exit__(self, *exc):
        return False

    def __iter__(self):
        raise NotImplementedError

    def log(self, stats, tag=None, step=None):
        """Log intermediate stats according to log_interval."""
        raise NotImplementedError

    def print(self, stats, tag=None, step=None):
        """Print end-of-epoch stats."""
        raise NotImplementedError

    def _str_commas(self, stats):
        return ', '.join(key + '=' + stats[key].strip()
                         for key in stats.keys())

    def _str_pipes(self, stats):
        return ' | '.join(key + ' ' + stats[key].strip()
                          for key in stats.keys())

    def _format_stats(self, stats):
        postfix = OrderedDict(stats)
        # Preprocess stats according to datatype
        for key in postfix.keys():
            postfix[key] = str(format_stat(postfix[key]))
        return postfix


@contextmanager
def rename_logger(logger, new_name):
    old_name = logger.name
    if new_name is not None:
        logger.name = new_name
    yield logger
    logger.name = old_name


class json_progress_bar(progress_bar):
    """Log output in JSON format."""

    def __init__(self, iterable, epoch=None, prefix=None, log_interval=1000):
        super().__init__(iterable, epoch, prefix)
        self.log_interval = log_interval
        self.stats = None
        self.tag = None

    def __iter__(self):
        size = float(len(self.iterable))
        for i, obj in enumerate(self.iterable, start=self.offset):
            yield obj
            if (
                self.stats is not None
                and i > 0
                and self.log_interval is not None
                and (i + 1) % self.log_interval == 0
            ):
                update = (
                    self.epoch - 1 + float(i / size)
                    if self.epoch is not None
                    else None
                )
                stats = self._format_stats(self.stats, epoch=self.epoch, update=update)
                with rename_logger(logger, self.tag):
                    logger.info(json.dumps(stats))

    def log(self, stats, tag=None, step=None):
        """Log intermediate stats according to log_interval."""
        self.stats = stats
        self.tag = tag

    def print(self, stats, tag=None, step=None):
        """Print end-of-epoch stats."""
        self.stats = stats
        if tag is not None:
            self.stats = OrderedDict([(tag + '_' + k, v) for k, v in self.stats.items()])
        stats = self._format_stats(self.stats, epoch=self.epoch)
        with rename_logger(logger, tag):
            logger.info(json.dumps(stats))

    def _format_stats(self, stats, epoch=None, update=None):
        postfix = OrderedDict()
        if epoch is not None:
            postfix['epoch'] = epoch
        if update is not None:
            postfix['update'] = round(update, 3)
        # Preprocess stats according to datatype
        for key in stats.keys():
            postfix[key] = format_stat(stats[key])
        return postfix


class noop_progress_bar(progress_bar):
    """No logging."""

    def __init__(self, iterable, epoch=None, prefix=None):
        super().__init__(iterable, epoch, prefix)

    def __iter__(self):
        for obj in self.iterable:
            yield obj

    def log(self, stats, tag=None, step=None):
        """Log intermediate stats according to log_interval."""
        pass

    def print(self, stats, tag=None, step=None):
        """Print end-of-epoch stats."""
        pass


class simple_progress_bar(progress_bar):
    """A minimal logger for non-TTY environments."""

    def __init__(self, iterable, epoch=None, prefix=None, log_interval=1000):
        super().__init__(iterable, epoch, prefix)
        self.log_interval = log_interval
        self.stats = None
        self.tag = None

    def __iter__(self):
        size = len(self.iterable)
        for i, obj in enumerate(self.iterable, start=self.offset):
            yield obj
            if (
                self.stats is not None
                and i > 0
                and self.log_interval is not None
                and (i + 1) % self.log_interval == 0
            ):
                postfix = self._str_commas(self.stats)
                with rename_logger(logger, self.tag):
                    logger.info('{}:  {:5d} / {:d} {}'.format(self.prefix, i, size, postfix))

    def log(self, stats, tag=None, step=None):
        """Log intermediate stats according to log_interval."""
        self.stats = self._format_stats(stats)
        self.tag = tag

    def print(self, stats, tag=None, step=None):
        """Print end-of-epoch stats."""
        postfix = self._str_pipes(self._format_stats(stats))
        with rename_logger(logger, tag):
            logger.info('{} | {}'.format(self.prefix, postfix))


class tqdm_progress_bar(progress_bar):
    """Log to tqdm."""

    def __init__(self, iterable, epoch=None, prefix=None):
        super().__init__(iterable, epoch, prefix)
        from tqdm import tqdm
        self.tqdm = tqdm(iterable, self.prefix, leave=False)

    def __iter__(self):
        return iter(self.tqdm)

    def log(self, stats, tag=None, step=None):
        """Log intermediate stats according to log_interval."""
        self.tqdm.set_postfix(self._format_stats(stats), refresh=False)

    def print(self, stats, tag=None, step=None):
        """Print end-of-epoch stats."""
        postfix = self._str_pipes(self._format_stats(stats))
        self.tqdm.write('{} | {}'.format(self.tqdm.desc, postfix))


class tensorboard_log_wrapper(progress_bar):
    """Log to tensorboard."""

    def __init__(self, wrapped_bar, tensorboard_logdir, args):
        self.wrapped_bar = wrapped_bar
        self.tensorboard_logdir = tensorboard_logdir
        self.args = args

        try:
            from tensorboardX import SummaryWriter
            self.SummaryWriter = SummaryWriter
            self._writers = {}
        except ImportError:
            logger.warning(
                "tensorboard or required dependencies not found, "
                "please see README for using tensorboard. (e.g. pip install tensorboardX)"
            )
            self.SummaryWriter = None

    def _writer(self, key):
        if self.SummaryWriter is None:
            return None
        if key not in self._writers:
            self._writers[key] = self.SummaryWriter(
                os.path.join(self.tensorboard_logdir, key),
            )
            self._writers[key].add_text('args', str(vars(self.args)))
            self._writers[key].add_text('sys.argv', " ".join(sys.argv))
        return self._writers[key]

    def __iter__(self):
        return iter(self.wrapped_bar)

    def log(self, stats, tag=None, step=None):
        """Log intermediate stats to tensorboard."""
        self._log_to_tensorboard(stats, tag, step)
        self.wrapped_bar.log(stats, tag=tag, step=step)

    def print(self, stats, tag=None, step=None):
        """Print end-of-epoch stats."""
        self._log_to_tensorboard(stats, tag, step)
        self.wrapped_bar.print(stats, tag=tag, step=step)

    def __exit__(self, *exc):
        for writer in getattr(self, '_writers', {}).values():
            writer.close()
        return False

    def _log_to_tensorboard(self, stats, tag=None, step=None):
        writer = self._writer(tag or '')
        if writer is None:
            return
        if step is None:
            step = stats['num_updates']
        for key in stats.keys() - {'num_updates'}:
            if isinstance(stats[key], AverageMeter):
                writer.add_scalar(key, stats[key].val, step)
            elif isinstance(stats[key], Number):
                writer.add_scalar(key, stats[key], step)
