# Supplementary material
Source: ML conference proceedings conference paper supplement (https://proceedings.neurips.cc/paper_files/paper/2022/hash/35f805e65c77652efa731edc10c8e3a6-Abstract.html)
Supplement: Supplementary file 1 [file 35f805e65c77652efa731edc10c8e3a6-Supplemental-Conference.zip › Supplementary Material/code/fairseq/tasks/fairseq_task.py]

# Copyright (c) Facebook, Inc. and its affiliates.
#
# This source code is licensed under the MIT license found in the
# LICENSE file in the root directory of this source tree.

import warnings

import torch

from fairseq import metrics, search, tokenizer, utils
from fairseq.data import (
    data_utils,
    FairseqDataset,
    iterators,
    Dictionary,
)


class FairseqTask(object):
    """
    Tasks store dictionaries and provide helpers for loading/iterating over
    Datasets, initializing the Model/Criterion and calculating the loss.
    """

    @staticmethod
    def add_args(parser):
        """Add task-specific arguments to the parser."""
        pass

    @staticmethod
    def logging_outputs_can_be_summed(criterion) -> bool:
        """
        Whether the logging outputs returned by `train_step` and `valid_step` can
        be summed across workers prior to calling `aggregate_logging_outputs`.
        Setting this to True will improves distributed training speed.
        """
        return criterion.logging_outputs_can_be_summed()

    def __init__(self, args):
        self.args = args
        self.datasets = {}
        self.dataset_to_epoch_iter = {}

    @classmethod
    def load_dictionary(cls, filename):
        """Load the dictionary from the filename

        Args:
            filename (str): the filename
        """
        return Dictionary.load(filename)

    @classmethod
    def build_dictionary(cls, filenames, workers=1, threshold=-1, nwords=-1, padding_factor=8):
        """Build the dictionary

        Args:
            filenames (list): list of filenames
            workers (int): number of concurrent workers
            threshold (int): defines the minimum word count
            nwords (int): defines the total number of words in the final dictionary,
                including special symbols
            padding_factor (int): can be used to pad the dictionary size to be a
                multiple of 8, which is important on some hardware (e.g., Nvidia
                Tensor Cores).
        """
        d = Dictionary()
        for filename in filenames:
            Dictionary.add_file_to_dictionary(filename, d, tokenizer.tokenize_line, workers)
        d.finalize(threshold=threshold, nwords=nwords, padding_factor=padding_factor)
        return d

    @classmethod
    def setup_task(cls, args, **kwargs):
        """Setup the task (e.g., load dictionaries).

        Args:
            args (argparse.Namespace): parsed command-line arguments
        """
        return cls(args, **kwargs)

    def load_dataset(self, split, combine=False, **kwargs):
        """Load a given dataset split.

        Args:
            split (str): name of the split (e.g., train, valid, test)
        """
        raise NotImplementedError

    def dataset(self, split):
        """
        Return a loaded dataset split.

        Args:
            split (str): name of the split (e.g., train, valid, test)

        Returns:
            a :class:`~fairseq.data.FairseqDataset` corresponding to *split*
        """
        from fairseq.data import FairseqDataset
        if split not in self.datasets:
            raise KeyError('Dataset not loaded: ' + split)
        if not isinstance(self.datasets[split], FairseqDataset):
            raise TypeError('Datasets are expected to be of type FairseqDataset')
        return self.datasets[split]

    def get_batch_iterator(
        self, dataset, max_tokens=None, max_sentences=None, max_positions=None,
        ignore_invalid_inputs=False, required_batch_size_multiple=1,
        seed=1, num_shards=1, shard_id=0, num_workers=0, epoch=0,
    ):
        """
        Get an iterator that yields batches of data from the given dataset.

        Args:
            dataset (~fairseq.data.FairseqDataset): dataset to batch
            max_tokens (int, optional): max number of tokens in each batch
                (default: None).
            max_sentences (int, optional): max number of sentences in each
                batch (default: None).
            max_positions (optional): max sentence length supported by the
                model (default: None).
            ignore_invalid_inputs (bool, optional): don't raise Exception for
                sentences that are too long (default: False).
            required_batch_size_multiple (int, optional): require batch size to
                be a multiple of N (default: 1).
            seed (int, optional): seed for random number generator for
                reproducibility (default: 1).
            num_shards (int, optional): shard the data iterator into N
                shards (default: 1).
            shard_id (int, optional): which shard of the data iterator to
                return (default: 0).
            num_workers (int, optional): how many subprocesses to use for data
                loading. 0 means the data will be loaded in the main process
                (default: 0).
            epoch (int, optional): the epoch to start the iterator from
                (default: 0).
        Returns:
            ~fairseq.iterators.EpochBatchIterator: a batched iterator over the
                given dataset split
        """
        # For default fairseq task, return same iterator across epochs
        # as datasets are not dynamic, can be overridden in task specific
        # setting.
        if dataset in self.dataset_to_epoch_iter:
            return self.dataset_to_epoch_iter[dataset]

        assert isinstance(dataset, FairseqDataset)

        # initialize the dataset with the correct starting epoch
        dataset.set_epoch(epoch)

        # get indices ordered by example size
        with data_utils.numpy_seed(seed):
            indices = dataset.ordered_indices()

        # filter examples that are too large
        if max_positions is not None:
            indices = data_utils.filter_by_size(
                indices, dataset, max_positions, raise_exception=(not ignore_invalid_inputs),
            )

        # create mini-batches with given size constraints
        batch_sampler = data_utils.batch_by_size(
            indices, dataset.num_tokens, max_tokens=max_tokens, max_sentences=max_sentences,
            required_batch_size_multiple=required_batch_size_multiple,
        )

        # return a reusable, sharded iterator
        epoch_iter = iterators.EpochBatchIterator(
            dataset=dataset,
            collate_fn=dataset.collater,
            batch_sampler=batch_sampler,
            seed=seed,
            num_shards=num_shards,
            shard_id=shard_id,
            num_workers=num_workers,
            epoch=epoch,
        )
        self.dataset_to_epoch_iter[dataset] = epoch_iter
        return epoch_iter

    def build_model(self, args):
        """
        Build the :class:`~fairseq.models.BaseFairseqModel` instance for this
        task.

        Args:
            args (argparse.Namespace): parsed command-line arguments

        Returns:
            a :class:`~fairseq.models.BaseFairseqModel` instance
        """
        from fairseq import models
        return models.build_model(args, self)

    def build_criterion(self, args):
        """
        Build the :class:`~fairseq.criterions.FairseqCriterion` instance for
        this task.

        Args:
            args (argparse.Namespace): parsed command-line arguments

        Returns:
            a :class:`~fairseq.criterions.FairseqCriterion` instance
        """
        from fairseq import criterions
        return criterions.build_criterion(args, self)

    def build_generator(self, args):
        if getattr(args, 'score_reference', False):
            from fairseq.sequence_scorer import SequenceScorer
            return SequenceScorer(
                self.target_dictionary,
                compute_alignment=getattr(args, 'print_alignment', False),
            )

        from fairseq.sequence_generator import SequenceGenerator, SequenceGeneratorWithAlignment

        # Choose search strategy. Defaults to Beam Search.
        sampling = getattr(args, 'sampling', False)
        sampling_topk = getattr(args, 'sampling_topk', -1)
        sampling_topp = getattr(args, 'sampling_topp', -1.0)
        diverse_beam_groups = getattr(args, 'diverse_beam_groups', -1)
        diverse_beam_strength = getattr(args, 'diverse_beam_strength', 0.5),
        match_source_len = getattr(args, 'match_source_len', False)
        diversity_rate = getattr(args, 'diversity_rate', -1)
        if (
            sum(
                int(cond)
                for cond in [
                    sampling,
                    diverse_beam_groups > 0,
                    match_source_len,
                    diversity_rate > 0,
                ]
            )
            > 1
        ):
            raise ValueError('Provided Search parameters are mutually exclusive.')
        assert sampling_topk < 0 or sampling, '--sampling-topk requires --sampling'
        assert sampling_topp < 0 or sampling, '--sampling-topp requires --sampling'

        if sampling:
            search_strategy = search.Sampling(self.target_dictionary, sampling_topk, sampling_topp)
        elif diverse_beam_groups > 0:
            search_strategy = search.DiverseBeamSearch(
                self.target_dictionary, diverse_beam_groups, diverse_beam_strength)
        elif match_source_len:
            # this is useful for tagging applications where the output
            # length should match the input length, so we hardcode the
            # length constraints for simplicity
            search_strategy = search.LengthConstrainedBeamSearch(
                self.target_dictionary, min_len_a=1, min_len_b=0, max_len_a=1, max_len_b=0,
            )
        elif diversity_rate > -1:
            search_strategy = search.DiverseSiblingsSearch(self.target_dictionary, diversity_rate)
        else:
            search_strategy = search.BeamSearch(self.target_dictionary)

        if getattr(args, 'print_alignment', False):
            seq_gen_cls = SequenceGeneratorWithAlignment
        else:
            seq_gen_cls = SequenceGenerator

        return seq_gen_cls(
            self.target_dictionary,
            beam_size=getattr(args, 'beam', 5),
            max_len_a=getattr(args, 'max_len_a', 0),
            max_len_b=getattr(args, 'max_len_b', 200),
            min_len=getattr(args, 'min_len', 1),
            normalize_scores=(not getattr(args, 'unnormalized', False)),
            len_penalty=getattr(args, 'lenpen', 1),
            unk_penalty=getattr(args, 'unkpen', 0),
            temperature=getattr(args, 'temperature', 1.),
            match_source_len=getattr(args, 'match_source_len', False),
            no_repeat_ngram_size=getattr(args, 'no_repeat_ngram_size', 0),
            search_strategy=search_strategy,
        )

    def train_step(self, sample, model, criterion, optimizer, ignore_grad=False):
        """
        Do forward and backward, and return the loss as computed by *criterion*
        for the given *model* and *sample*.

        Args:
            sample (dict): the mini-batch. The format is defined by the
                :class:`~fairseq.data.FairseqDataset`.
            model (~fairseq.models.BaseFairseqModel): the model
            criterion (~fairseq.criterions.FairseqCriterion): the criterion
            optimizer (~fairseq.optim.FairseqOptimizer): the optimizer
            ignore_grad (bool): multiply loss by 0 if this is set to True

        Returns:
            tuple:
                - the loss
                - the sample size, which is used as the denominator for the
                  gradient
                - logging outputs to display while training
        """
        model.train()
        loss, sample_size, logging_output = criterion(model, sample)
        if ignore_grad:
            loss *= 0
        optimizer.backward(loss)
        return loss, sample_size, logging_output

    def valid_step(self, sample, model, criterion):
        model.eval()
        with torch.no_grad():
            loss, sample_size, logging_output = criterion(model, sample)
        return loss, sample_size, logging_output

    def inference_step(self, generator, models, sample, prefix_tokens=None):
        with torch.no_grad():
            return generator.generate(models, sample, prefix_tokens=prefix_tokens)

    def begin_epoch(self, epoch, model):
        """Hook function called before the start of each epoch."""
        pass

    def update_step(self, num_updates):
        """Task level update when number of updates increases.

        This is called after the optimization step and learning rate
        update at each iteration.
        """
        pass

    def aggregate_logging_outputs(self, logging_outputs, criterion):
        """[deprecated] Aggregate logging outputs from data parallel training."""
        utils.deprecation_warning(
            'The aggregate_logging_outputs API is deprecated. '
            'Please use the reduce_metrics API instead.'
        )
        with metrics.aggregate() as agg:
            self.reduce_metrics(logging_outputs, criterion)
            return agg.get_smoothed_values()

    def reduce_metrics(self, logging_outputs, criterion):
        """Aggregate logging outputs from data parallel training."""
        # backward compatibility for tasks that override aggregate_logging_outputs
        base_func = FairseqTask.aggregate_logging_outputs
        self_func = getattr(self, 'aggregate_logging_outputs').__func__
        if self_func is not base_func:
            utils.deprecation_warning(
                'Tasks should implement the reduce_metrics API. '
                'Falling back to deprecated aggregate_logging_outputs API.'
            )
            agg_logging_outputs = self.aggregate_logging_outputs(logging_outputs, criterion)
            for k, v in agg_logging_outputs.items():
                metrics.log_scalar(k, v)
            return

        if not any('ntokens' in log for log in logging_outputs):
            warnings.warn('ntokens not found in Criterion logging outputs, cannot log wpb or wps')
        else:
            ntokens = utils.item(sum(log.get('ntokens', 0) for log in logging_outputs))
            metrics.log_scalar('wpb', ntokens, priority=180, round=1)
            metrics.log_speed('wps', ntokens, ignore_first=10, priority=90, round=1)

        if not any('nsentences' in log for log in logging_outputs):
            warnings.warn('nsentences not found in Criterion logging outputs, cannot log bsz')
        else:
            nsentences = utils.item(sum(log.get('nsentences', 0) for log in logging_outputs))
            metrics.log_scalar('bsz', nsentences, priority=190, round=1)

        criterion.__class__.reduce_metrics(logging_outputs)

    def max_positions(self):
        """Return the max input length allowed by the task."""
        return None

    @property
    def source_dictionary(self):
        """Return the source :class:`~fairseq.data.Dictionary` (if applicable
        for this task)."""
        raise NotImplementedError

    @property
    def target_dictionary(self):
        """Return the target :class:`~fairseq.data.Dictionary` (if applicable
        for this task)."""
        raise NotImplementedError
