# Supplementary material
Source: ML conference proceedings conference paper supplement (https://proceedings.neurips.cc/paper_files/paper/2022/hash/35f805e65c77652efa731edc10c8e3a6-Abstract.html)
Supplement: Supplementary file 1 [file 35f805e65c77652efa731edc10c8e3a6-Supplemental-Conference.zip › Supplementary Material/code/fairseq/tasks/translation.py]

# Copyright (c) Facebook, Inc. and its affiliates.
#
# This source code is licensed under the MIT license found in the
# LICENSE file in the root directory of this source tree.

from argparse import Namespace
import json
import itertools
import logging
import os

import numpy as np

from fairseq import metrics, options, utils
from fairseq.data import (
    AppendTokenDataset,
    ConcatDataset,
    data_utils,
    encoders,
    indexed_dataset,
    LanguagePairDataset,
    PrependTokenDataset,
    StripTokenDataset,
    TruncateDataset,
)

from fairseq.tasks import FairseqTask, register_task

EVAL_BLEU_ORDER = 4


logger = logging.getLogger(__name__)


def load_langpair_dataset(
    data_path, split,
    src, src_dict,
    tgt, tgt_dict,
    combine, dataset_impl, upsample_primary,
    left_pad_source, left_pad_target, max_source_positions,
    max_target_positions, prepend_bos=False, load_alignments=False,
    truncate_source=False,
):

    def split_exists(split, src, tgt, lang, data_path):
        filename = os.path.join(data_path, '{}.{}-{}.{}'.format(split, src, tgt, lang))
        return indexed_dataset.dataset_exists(filename, impl=dataset_impl)

    src_datasets = []
    tgt_datasets = []

    for k in itertools.count():
        split_k = split + (str(k) if k > 0 else '')

        # infer langcode
        if split_exists(split_k, src, tgt, src, data_path):
            prefix = os.path.join(data_path, '{}.{}-{}.'.format(split_k, src, tgt))
        elif split_exists(split_k, tgt, src, src, data_path):
            prefix = os.path.join(data_path, '{}.{}-{}.'.format(split_k, tgt, src))
        else:
            if k > 0:
                break
            else:
                raise FileNotFoundError('Dataset not found: {} ({})'.format(split, data_path))

        src_dataset = data_utils.load_indexed_dataset(prefix + src, src_dict, dataset_impl)
        if truncate_source:
            src_dataset = AppendTokenDataset(
                TruncateDataset(
                    StripTokenDataset(src_dataset, src_dict.eos()),
                    max_source_positions - 1,
                ),
                src_dict.eos(),
            )
        src_datasets.append(src_dataset)
        tgt_datasets.append(
            data_utils.load_indexed_dataset(prefix + tgt, tgt_dict, dataset_impl)
        )

        logger.info('{} {} {}-{} {} examples'.format(
            data_path, split_k, src, tgt, len(src_datasets[-1])
        ))

        if not combine:
            break

    assert len(src_datasets) == len(tgt_datasets)

    if len(src_datasets) == 1:
        src_dataset, tgt_dataset = src_datasets[0], tgt_datasets[0]
    else:
        sample_ratios = [1] * len(src_datasets)
        sample_ratios[0] = upsample_primary
        src_dataset = ConcatDataset(src_datasets, sample_ratios)
        tgt_dataset = ConcatDataset(tgt_datasets, sample_ratios)

    if prepend_bos:
        assert hasattr(src_dict, "bos_index") and hasattr(tgt_dict, "bos_index")
        src_dataset = PrependTokenDataset(src_dataset, src_dict.bos())
        tgt_dataset = PrependTokenDataset(tgt_dataset, tgt_dict.bos())

    align_dataset = None
    if load_alignments:
        align_path = os.path.join(data_path, '{}.align.{}-{}'.format(split, src, tgt))
        if indexed_dataset.dataset_exists(align_path, impl=dataset_impl):
            align_dataset = data_utils.load_indexed_dataset(align_path, None, dataset_impl)

    return LanguagePairDataset(
        src_dataset, src_dataset.sizes, src_dict,
        tgt_dataset, tgt_dataset.sizes, tgt_dict,
        left_pad_source=left_pad_source,
        left_pad_target=left_pad_target,
        max_source_positions=max_source_positions,
        max_target_positions=max_target_positions,
        align_dataset=align_dataset,
    )


@register_task('translation')
class TranslationTask(FairseqTask):
    """
    Translate from one (source) language to another (target) language.

    Args:
        src_dict (~fairseq.data.Dictionary): dictionary for the source language
        tgt_dict (~fairseq.data.Dictionary): dictionary for the target language

    .. note::

        The translation task is compatible with :mod:`fairseq-train`,
        :mod:`fairseq-generate` and :mod:`fairseq-interactive`.

    The translation task provides the following additional command-line
    arguments:

    .. argparse::
        :ref: fairseq.tasks.translation_parser
        :prog:
    """

    @staticmethod
    def add_args(parser):
        """Add task-specific arguments to the parser."""
        # fmt: off
        parser.add_argument('data', help='colon separated path to data directories list, \
                            will be iterated upon during epochs in round-robin manner')
        parser.add_argument('-s', '--source-lang', default=None, metavar='SRC',
                            help='source language')
        parser.add_argument('-t', '--target-lang', default=None, metavar='TARGET',
                            help='target language')
        parser.add_argument('--load-alignments', action='store_true',
                            help='load the binarized alignments')
        parser.add_argument('--left-pad-source', default='True', type=str, metavar='BOOL',
                            help='pad the source on the left')
        parser.add_argument('--left-pad-target', default='False', type=str, metavar='BOOL',
                            help='pad the target on the left')
        parser.add_argument('--max-source-positions', default=1024, type=int, metavar='N',
                            help='max number of tokens in the source sequence')
        parser.add_argument('--max-target-positions', default=1024, type=int, metavar='N',
                            help='max number of tokens in the target sequence')
        parser.add_argument('--upsample-primary', default=1, type=int,
                            help='amount to upsample primary dataset')
        parser.add_argument('--truncate-source', action='store_true', default=False,
                            help='truncate source to max-source-positions')

        # options for reporting BLEU during validation
        parser.add_argument('--eval-bleu', action='store_true',
                            help='evaluation with BLEU scores')
        parser.add_argument('--eval-bleu-detok', type=str, default="space",
                            help='detokenizer before computing BLEU (e.g., "moses"); '
                                 'required if using --eval-bleu; use "space" to '
                                 'disable detokenization; see fairseq.data.encoders '
                                 'for other options')
        parser.add_argument('--eval-bleu-detok-args', type=str, metavar='JSON',
                            help='args for building the tokenizer, if needed')
        parser.add_argument('--eval-tokenized-bleu', action='store_true', default=False,
                            help='if setting, we compute tokenized BLEU instead of sacrebleu')
        parser.add_argument('--eval-bleu-remove-bpe', nargs='?', const='@@ ', default=None,
                            help='remove BPE before computing BLEU')
        parser.add_argument('--eval-bleu-args', type=str, metavar='JSON',
                            help='generation args for BLUE scoring, '
                                 'e.g., \'{"beam": 4, "lenpen": 0.6}\'')
        parser.add_argument('--eval-bleu-print-samples', action='store_true',
                            help='print sample generations during validation')
        # fmt: on

    def __init__(self, args, src_dict, tgt_dict):
        super().__init__(args)
        self.src_dict = src_dict
        self.tgt_dict = tgt_dict

    @classmethod
    def setup_task(cls, args, **kwargs):
        """Setup the task (e.g., load dictionaries).

        Args:
            args (argparse.Namespace): parsed command-line arguments
        """
        args.left_pad_source = options.eval_bool(args.left_pad_source)
        args.left_pad_target = options.eval_bool(args.left_pad_target)

        paths = args.data.split(os.pathsep)
        assert len(paths) > 0
        # find language pair automatically
        if args.source_lang is None or args.target_lang is None:
            args.source_lang, args.target_lang = data_utils.infer_language_pair(paths[0])
        if args.source_lang is None or args.target_lang is None:
            raise Exception('Could not infer language pair, please provide it explicitly')

        # load dictionaries
        src_dict = cls.load_dictionary(os.path.join(paths[0], 'dict.{}.txt'.format(args.source_lang)))
        tgt_dict = cls.load_dictionary(os.path.join(paths[0], 'dict.{}.txt'.format(args.target_lang)))
        assert src_dict.pad() == tgt_dict.pad()
        assert src_dict.eos() == tgt_dict.eos()
        assert src_dict.unk() == tgt_dict.unk()
        logger.info('[{}] dictionary: {} types'.format(args.source_lang, len(src_dict)))
        logger.info('[{}] dictionary: {} types'.format(args.target_lang, len(tgt_dict)))

        return cls(args, src_dict, tgt_dict)

    def load_dataset(self, split, epoch=0, combine=False, **kwargs):
        """Load a given dataset split.

        Args:
            split (str): name of the split (e.g., train, valid, test)
        """
        paths = self.args.data.split(os.pathsep)
        assert len(paths) > 0
        data_path = paths[epoch % len(paths)]

        # infer langcode
        src, tgt = self.args.source_lang, self.args.target_lang

        self.datasets[split] = load_langpair_dataset(
            data_path, split, src, self.src_dict, tgt, self.tgt_dict,
            combine=combine, dataset_impl=self.args.dataset_impl,
            upsample_primary=self.args.upsample_primary,
            left_pad_source=self.args.left_pad_source,
            left_pad_target=self.args.left_pad_target,
            max_source_positions=self.args.max_source_positions,
            max_target_positions=self.args.max_target_positions,
            load_alignments=self.args.load_alignments,
            truncate_source=self.args.truncate_source,
        )

    def build_dataset_for_inference(self, src_tokens, src_lengths):
        return LanguagePairDataset(src_tokens, src_lengths, self.source_dictionary)

    def build_model(self, args):
        if getattr(args, 'eval_bleu', False):
            assert getattr(args, 'eval_bleu_detok', None) is not None, (
                '--eval-bleu-detok is required if using --eval-bleu; '
                'try --eval-bleu-detok=moses (or --eval-bleu-detok=space '
                'to disable detokenization, e.g., when using sentencepiece)'
            )
            detok_args = json.loads(getattr(args, 'eval_bleu_detok_args', '{}') or '{}')
            self.tokenizer = encoders.build_tokenizer(Namespace(
                tokenizer=getattr(args, 'eval_bleu_detok', None),
                **detok_args
            ))

            gen_args = json.loads(getattr(args, 'eval_bleu_args', '{}') or '{}')
            self.sequence_generator = self.build_generator(Namespace(**gen_args))
        return super().build_model(args)

    def valid_step(self, sample, model, criterion):
        loss, sample_size, logging_output = super().valid_step(sample, model, criterion)
        if self.args.eval_bleu:
            bleu = self._inference_with_bleu(self.sequence_generator, sample, model)
            logging_output['_bleu_sys_len'] = bleu.sys_len
            logging_output['_bleu_ref_len'] = bleu.ref_len
            # we split counts into separate entries so that they can be
            # summed efficiently across workers using fast-stat-sync
            assert len(bleu.counts) == EVAL_BLEU_ORDER
            for i in range(EVAL_BLEU_ORDER):
                logging_output['_bleu_counts_' + str(i)] = bleu.counts[i]
                logging_output['_bleu_totals_' + str(i)] = bleu.totals[i]
        return loss, sample_size, logging_output

    def reduce_metrics(self, logging_outputs, criterion):
        super().reduce_metrics(logging_outputs, criterion)
        if self.args.eval_bleu:

            def sum_logs(key):
                return sum(log.get(key, 0) for log in logging_outputs)

            counts, totals = [], []
            for i in range(EVAL_BLEU_ORDER):
                counts.append(sum_logs('_bleu_counts_' + str(i)))
                totals.append(sum_logs('_bleu_totals_' + str(i)))

            if max(totals) > 0:
                # log counts as numpy arrays -- log_scalar will sum them correctly
                metrics.log_scalar('_bleu_counts', np.array(counts))
                metrics.log_scalar('_bleu_totals', np.array(totals))
                metrics.log_scalar('_bleu_sys_len', sum_logs('_bleu_sys_len'))
                metrics.log_scalar('_bleu_ref_len', sum_logs('_bleu_ref_len'))

                def compute_bleu(meters):
                    import inspect
                    import sacrebleu
                    fn_sig = inspect.getfullargspec(sacrebleu.compute_bleu)[0]
                    if 'smooth_method' in fn_sig:
                        smooth = {'smooth_method': 'exp'}
                    else:
                        smooth = {'smooth': 'exp'}
                    bleu = sacrebleu.compute_bleu(
                        correct=meters['_bleu_counts'].sum,
                        total=meters['_bleu_totals'].sum,
                        sys_len=meters['_bleu_sys_len'].sum,
                        ref_len=meters['_bleu_ref_len'].sum,
                        **smooth
                    )
                    return round(bleu.score, 2)

                metrics.log_derived('bleu', compute_bleu)

    def max_positions(self):
        """Return the max sentence length allowed by the task."""
        return (self.args.max_source_positions, self.args.max_target_positions)

    @property
    def source_dictionary(self):
        """Return the source :class:`~fairseq.data.Dictionary`."""
        return self.src_dict

    @property
    def target_dictionary(self):
        """Return the target :class:`~fairseq.data.Dictionary`."""
        return self.tgt_dict

    def _inference_with_bleu(self, generator, sample, model):
        import sacrebleu

        def decode(toks, escape_unk=False):
            s = self.tgt_dict.string(
                toks.int().cpu(),
                self.args.eval_bleu_remove_bpe,
                escape_unk=escape_unk,
            )
            if self.tokenizer:
                s = self.tokenizer.decode(s)
            return s

        gen_out = self.inference_step(generator, [model], sample, None)
        hyps, refs = [], []
        for i in range(len(gen_out)):
            hyps.append(decode(gen_out[i][0]['tokens']))
            refs.append(decode(
                utils.strip_pad(sample['target'][i], self.tgt_dict.pad()),
                escape_unk=True,  # don't count <unk> as matches to the hypo
            ))
        if self.args.eval_bleu_print_samples:
            logger.info('example hypothesis: ' + hyps[0])
            logger.info('example reference: ' + refs[0])
        tokenize = sacrebleu.DEFAULT_TOKENIZER if not self.args.eval_tokenized_bleu else 'none'
        return sacrebleu.corpus_bleu(hyps, [refs], tokenize=tokenize)
