# Supplementary material
Source: ML conference proceedings conference paper supplement (https://proceedings.neurips.cc/paper_files/paper/2022/hash/35f805e65c77652efa731edc10c8e3a6-Abstract.html)
Supplement: Supplementary file 1 [file 35f805e65c77652efa731edc10c8e3a6-Supplemental-Conference.zip › Supplementary Material/code/fairseq/tasks/translation_moe.py]

# Copyright (c) Facebook, Inc. and its affiliates.
#
# This source code is licensed under the MIT license found in the
# LICENSE file in the root directory of this source tree.

import torch

from fairseq import metrics, modules, utils
from fairseq.tasks import register_task
from fairseq.tasks.translation import TranslationTask


@register_task('translation_moe')
class TranslationMoETask(TranslationTask):
    """
    Translation task for Mixture of Experts (MoE) models.

    See `"Mixture Models for Diverse Machine Translation: Tricks of the Trade"
    (Shen et al., 2019) <https://arxiv.org/abs/1902.07816>`_.

    Args:
        src_dict (~fairseq.data.Dictionary): dictionary for the source language
        tgt_dict (~fairseq.data.Dictionary): dictionary for the target language

    .. note::

        The translation task is compatible with :mod:`fairseq-train`,
        :mod:`fairseq-generate` and :mod:`fairseq-interactive`.

    The translation task provides the following additional command-line
    arguments:

    .. argparse::
        :ref: fairseq.tasks.translation_parser
        :prog:
    """

    @staticmethod
    def add_args(parser):
        """Add task-specific arguments to the parser."""
        # fmt: off
        TranslationTask.add_args(parser)
        parser.add_argument('--method', default='hMoEup',
                            choices=['sMoElp', 'sMoEup', 'hMoElp', 'hMoEup'])
        parser.add_argument('--num-experts', default=3, type=int, metavar='N',
                            help='number of experts')
        parser.add_argument('--mean-pool-gating-network', action='store_true',
                            help='use a simple mean-pooling gating network')
        parser.add_argument('--mean-pool-gating-network-dropout', type=float,
                            help='dropout for mean-pooling gating network')
        parser.add_argument('--mean-pool-gating-network-encoder-dim', type=float,
                            help='encoder output dim for mean-pooling gating network')
        parser.add_argument('--gen-expert', type=int, default=0,
                            help='which expert to use for generation')
        # fmt: on

    def __init__(self, args, src_dict, tgt_dict):
        if args.method == 'sMoElp':
            # soft MoE with learned prior
            self.uniform_prior = False
            self.hard_selection = False
        elif args.method == 'sMoEup':
            # soft MoE with uniform prior
            self.uniform_prior = True
            self.hard_selection = False
        elif args.method == 'hMoElp':
            # hard MoE with learned prior
            self.uniform_prior = False
            self.hard_selection = True
        elif args.method == 'hMoEup':
            # hard MoE with uniform prior
            self.uniform_prior = True
            self.hard_selection = True

        # add indicator tokens for each expert
        for i in range(args.num_experts):
            # add to both dictionaries in case we're sharing embeddings
            src_dict.add_symbol('<expert_{}>'.format(i))
            tgt_dict.add_symbol('<expert_{}>'.format(i))

        super().__init__(args, src_dict, tgt_dict)

    def build_model(self, args):
        from fairseq import models
        model = models.build_model(args, self)
        if not self.uniform_prior and not hasattr(model, 'gating_network'):
            if self.args.mean_pool_gating_network:
                if getattr(args, 'mean_pool_gating_network_encoder_dim', None):
                    encoder_dim = args.mean_pool_gating_network_encoder_dim
                elif getattr(args, 'encoder_embed_dim', None):
                    # assume that encoder_embed_dim is the encoder's output dimension
                    encoder_dim = args.encoder_embed_dim
                else:
                    raise ValueError('Must specify --mean-pool-gating-network-encoder-dim')

                if getattr(args, 'mean_pool_gating_network_dropout', None):
                    dropout = args.mean_pool_gating_network_dropout
                elif getattr(args, 'dropout', None):
                    dropout = args.dropout
                else:
                    raise ValueError('Must specify --mean-pool-gating-network-dropout')

                model.gating_network = modules.MeanPoolGatingNetwork(
                    encoder_dim, args.num_experts, dropout,
                )
            else:
                raise ValueError(
                    'translation_moe task with learned prior requires the model to '
                    'have a gating network; try using --mean-pool-gating-network'
                )
        return model

    def expert_index(self, i):
        return i + self.tgt_dict.index('<expert_0>')

    def _get_loss(self, sample, model, criterion):
        assert hasattr(criterion, 'compute_loss'), \
            'translation_moe task requires the criterion to implement the compute_loss() method'

        k = self.args.num_experts
        bsz = sample['target'].size(0)

        def get_lprob_y(encoder_out, prev_output_tokens_k):
            net_output = model.decoder(
                prev_output_tokens=prev_output_tokens_k,
                encoder_out=encoder_out,
            )
            loss, _ = criterion.compute_loss(model, net_output, sample, reduce=False)
            loss = loss.view(bsz, -1)
            return -loss.sum(dim=1, keepdim=True)  # -> B x 1

        def get_lprob_yz(winners=None):
            encoder_out = model.encoder(
                src_tokens=sample['net_input']['src_tokens'],
                src_lengths=sample['net_input']['src_lengths'],
            )

            if winners is None:
                lprob_y = []
                for i in range(k):
                    prev_output_tokens_k = sample['net_input']['prev_output_tokens'].clone()
                    assert not prev_output_tokens_k.requires_grad
                    prev_output_tokens_k[:, 0] = self.expert_index(i)
                    lprob_y.append(get_lprob_y(encoder_out, prev_output_tokens_k))
                lprob_y = torch.cat(lprob_y, dim=1)  # -> B x K
            else:
                prev_output_tokens_k = sample['net_input']['prev_output_tokens'].clone()
                prev_output_tokens_k[:, 0] = self.expert_index(winners)
                lprob_y = get_lprob_y(encoder_out, prev_output_tokens_k)  # -> B

            if self.uniform_prior:
                lprob_yz = lprob_y
            else:
                lprob_z = model.gating_network(encoder_out)  # B x K
                if winners is not None:
                    lprob_z = lprob_z.gather(dim=1, index=winners.unsqueeze(-1))
                lprob_yz = lprob_y + lprob_z.type_as(lprob_y)  # B x K

            return lprob_yz

        # compute responsibilities without dropout
        with utils.eval(model):  # disable dropout
            with torch.no_grad():  # disable autograd
                lprob_yz = get_lprob_yz()  # B x K
                prob_z_xy = torch.nn.functional.softmax(lprob_yz, dim=1)
        assert not prob_z_xy.requires_grad

        # compute loss with dropout
        if self.hard_selection:
            winners = prob_z_xy.max(dim=1)[1]
            loss = -get_lprob_yz(winners)
        else:
            lprob_yz = get_lprob_yz()  # B x K
            loss = -modules.LogSumExpMoE.apply(lprob_yz, prob_z_xy, 1)

        loss = loss.sum()
        sample_size = sample['target'].size(0) if self.args.sentence_avg else sample['ntokens']
        logging_output = {
            'loss': utils.item(loss.data),
            'ntokens': sample['ntokens'],
            'nsentences': bsz,
            'sample_size': sample_size,
            'posterior': prob_z_xy.float().sum(dim=0).cpu(),
        }
        return loss, sample_size, logging_output

    def train_step(self, sample, model, criterion, optimizer, ignore_grad=False):
        model.train()
        loss, sample_size, logging_output = self._get_loss(sample, model, criterion)
        if ignore_grad:
            loss *= 0
        optimizer.backward(loss)
        return loss, sample_size, logging_output

    def valid_step(self, sample, model, criterion):
        model.eval()
        with torch.no_grad():
            loss, sample_size, logging_output = self._get_loss(sample, model, criterion)
        return loss, sample_size, logging_output

    def inference_step(self, generator, models, sample, prefix_tokens=None, expert=None):
        expert = expert or self.args.gen_expert
        with torch.no_grad():
            return generator.generate(
                models,
                sample,
                prefix_tokens=prefix_tokens,
                bos_token=self.expert_index(expert),
            )

    def reduce_metrics(self, logging_outputs, criterion):
        super().reduce_metrics(logging_outputs, criterion)
        metrics.log_scalar(
            'posterior',
            sum(log['posterior'] for log in logging_outputs if 'posterior' in log)
        )
