# Supplementary material
Source: ML conference proceedings conference paper supplement (https://proceedings.neurips.cc/paper_files/paper/2022/hash/35f805e65c77652efa731edc10c8e3a6-Abstract.html)
Supplement: Supplementary file 1 [file 35f805e65c77652efa731edc10c8e3a6-Supplemental-Conference.zip › Supplementary Material/code/generate.py]

#!/usr/bin/env python3 -u
# Copyright (c) Facebook, Inc. and its affiliates.
#
# This source code is licensed under the MIT license found in the
# LICENSE file in the root directory of this source tree.

from fairseq_cli.generate import cli_main


if __name__ == '__main__':
    cli_main()
