# Supplementary material
Source: ML conference proceedings conference paper supplement (https://proceedings.neurips.cc/paper_files/paper/2022/hash/35f805e65c77652efa731edc10c8e3a6-Abstract.html)
Supplement: Supplementary file 1 [file 35f805e65c77652efa731edc10c8e3a6-Supplemental-Conference.zip › Supplementary Material/code/ref.de]

Gutach : Noch mehr Sicherheit für Fußgänger
Sie stehen keine 100 Meter voneinander entfernt : Am Dienstag ist in Gutach die neue B 33 @-@ Fußgängerampel am Dorfparkplatz in Betrieb genommen worden - in Sichtweite der älteren Rathausampel .
Zwei Anlagen so nah beieinander : Absicht oder Schildbürgerstreich ?
Diese Frage hat Gutachs Bürgermeister gestern klar beantwortet .
&quot; Die Rathausampel ist damals installiert worden , weil diese den Schulweg sichert &quot; , erläuterte Eckert gestern .
Die Kluser @-@ Ampel sichere sowohl Radfahrer als auch Busfahrgäste und die Bergle @-@ Bewohner .
Die gestern offiziell in Betrieb genommene Anlage sei wichtig für den Kreuzungsbereich Sulzbachweg / Kirchstraße .
Wir haben das Museum , zwei Kirchen , Kurpark , die Bushaltestelle , einen Arzt und eine Bank sowie den Verkehrsfluss aus dem Wohngebiet › Grub ‹ .
&quot; Bei dem hohen Verkehrs- und Fußgängeraufkommen musste zu deren Sicherheit eine weitere Ampel her &quot; , so Eckert .
Dies bestätigt auch Peter Arnold vom Landratsamt Offenburg .
&quot; Laut aktuellen Messungen durchfahren auf der B 33 täglich etwa 12 000 Fahrzeuge die Gemeinde Gutach , davon sind etwa zehn Prozent Schwerlastverkehr &quot; , betont Arnold .
Daher sei der Bau einer weiteren Ampel mehr als notwendig : &quot; Sicherheit geht hier einfach vor &quot; , so Arnold .
Insgesamt seien vier Verkehrsschauen durchgeführt worden , auch ein Kreisverkehr wurde angedacht , allerdings wegen der Enge in dem Kreuzungsbereich Sulzbachweg / Kirchstraße wieder verworfen .
Es wurde laut Arnold bei der Standortwahl der Ampelmasten zuvor alles ausgetestet : &quot; Mittels eines extra für uns mit besonders langen Holzstämmen beladener Transporter haben wir ausgestestet , ob diese Fahrzeuge aus dem Sulzbachweg auf die B 33 ausfahren können , ohne den Ampelmasten umzuknicken &quot; .
Die rund 15 000 Euro teure Ampelanlage selbst ist das &quot; modernste , was es derzeit auf dem Markt gibt &quot; , erläuterte Arnold .
Die Anlage ist mit farbigen LEDs ausgestattet , die so kräftig leuchten , dass die Lichter von den Autofahrern beispielsweise auch bei tiefstehender Sonne gut zu erkennen sind .
Und sparsam ist sie auch : Die älteren Lichtanlagen verbrauchen etwa 100 Watt , die neuen gerade mal acht Watt .
Pro Fahrtrichtung gibt es drei Lichtanlagen .
Arnold erklärte die Technik der neuen Anlage : Diese ist mit zwei Radarsensoren ausgestattet .
Drückt der Fußgänger den Ampelknopf , testet der obere Radarsensor die Verkehrslage .
Ist die Straße frei , kommt unmittelbar Grün für den Fußgänger , wenn nicht , dauert es etwa 15 Sekunden .
Ein weiteres Radarsensor prüft , ob die Grünphase für den Fußgänger beendet werden kann .
&quot; Sollte eine Gruppe oder gehbehinderte Menschen über die Straße gehen , wird die Grünphase verlängert , es kommt also jeder sicher über die Fahrbahn &quot; , erklärte Arnold .
Natürlich müsse der Autofahrer hier als Partner mitdenken und die Fahrbahn beobachten .
Dies war gestern nicht der Fall : Kaum zeigte die Ampel für Fußgänger grün , rauschte ein Oberklasse @-@ Fahrzeug durch - bei leuchtendem Rot .
Josef Winkler schreibt sich seit mehr als 30 Jahren die Nöte seiner Kindheit und Jugend von der Seele .
Die Katastrophen seiner katholischen Dorfkindheit - die Sprachlosigkeit , der Hang zu roher Gewalt und stumpfer Sexualität , die Enge und Freudlosigkeit - hat der Kärntner Dichter vielfach beschrieben .
Bekannt ist der Büchner @-@ Preisträger vor allem als Prosaautor , Theatertexte sind in seinem Werk rar .
Collage aus Prosatexten Gerhard Fresacher stellt für seine Aufführung &quot; Wetterleuchten auf der Zungenspitze &quot; , die nun in der Garage X am Petersplatz zu sehen ist , daher eine Collage aus Prosatexten zusammen .
Der Theatermacher verbindet etwa Elemente aus dem autobiografisch geprägten Roman &quot; Der Leibeigene &quot; ( 1987 ) mit Prosaminiaturen aus &quot; Leichnam , seine Familie belauernd &quot; ( 2003 ) .
Auf der weitgehend leergeräumten Bühne - wichtiges Requisit : ein zerknautschtes Sofa , auf dem andeutungsweise kopuliert und masturbiert wird - hangelt sich das achtköpfige Ensemble durch das Textmaterial .
Dabei scheint Regisseur Fresacher dem Text wenig zu vertrauen .
Die 70 @-@ minütige Performance übertüncht die Vorlage mit einer Fülle an Regieeinfällen , bekannt aus dem Repertoire postdramatischer Spielformen .
Vor allem die Schauspielerinnen kommen bei den mitunter etwas fragwürdigen szenischen Umsetzungen dran .
Sie werden hart angefasst , mit dem Kopf unter Wasser getaucht , mit ihren Abendroben an die Wand getackert .
Eingezwängt in Zellophan oder Mieder , staksen sie auf gefährlich hohen Stöckeln durch die Inszenierung , entweder monologisieren sie lautstark oder liegen völlig verstummt auf dem Bühnenboden .
Der Text vermittelt sich auf diese angestrengte Weise jedoch kaum .
Die besten Momente hat der Abend , wenn gesungen wird - die Bandbreite reicht von Deep Purple bis zu volkstümlichem Liedgut .
Erst gegen Ende kommt die überdrehte Aufführung etwas zur Ruhe , und Winklers nachgerade absurder Humor blitzt auf .
Eine Blackbox im Auto ?
US @-@ amerikanische Straßenplaner sind auf der Suche nach einer Geldquelle , um das verfallende Highway @-@ System zu reparieren , und glauben die Lösung in einem kleinen schwarzen Kasten gefunden zu haben , der im Armaturenbrett jedes Autos Platz findet .
Die Geräte , die jeden gefahrenen Kilometer aufzeichnen und die Informationen an die Behörden melden , sind Kernpunkt eines kontroversen Versuchs von Washington und den Planungsbüros der Bundesstaaten , das veraltete System zur Finanzierung US @-@ amerikanischer Straßen zu überarbeiten .
Das normalerweise eher langweilige Gebiet der Straßenplanung hat plötzlich eine intensive Debatte mit bunten Allianzen entfacht .
Libertäre haben sich mit Umweltgruppen verbündet und sprechen sich dafür aus , dass die Regierung die kleinen Boxen zum Aufzeichnen der gefahrenen Kilometer – und möglicherweise auch , wo sie gefahren wurden – verwenden und die Informationen dann für die Berechnung von Steuerbescheiden einsetzen kann .
Die Tea Party ist entsetzt .
Die amerikanische Bürgerrechtsvereinigung ( ACLU ) ist ebenfalls zutiefst besorgt und äußert eine Reihe von Datenschutzbedenken .
Doch während man sich im Kongress nicht auf ein Vorgehen einigen kann , warten mehrere Bundesstaaten nicht länger .
Sie prüfen derzeit , wie sie im Laufe der nächsten zehn Jahre zu einem System wechseln können , bei dem Fahrer pro gefahrener Meile bezahlen .
Tausende von Autofahrern haben die Fahrtenschreiber , von denen einige mit GPS @-@ Überwachung ausgestattet sind , bereits getestet .
Das ist wirklich ein Muss für unser Land .
„ Es ist nichts , das wir nur möglicherweise verwenden werden “ , sagte Hasan Ikhrata , Geschäftsführer der Southern California Assn. of Governments , die eine Aufzeichnung der gefahrenen Meilen bei allen kalifornischen Autofahrern im Bundesstaat ab 2025 plant .
Die Art und Weise , wie wir diese Steuern zahlen , wird sich verändern .
Die Technologie dafür ist da .
Die Initiative kommt zu einem Zeitpunkt , da der Highway Trust Fund , der aus den Steuern finanziert wird , die US @-@ Amerikaner an der Zapfsäule entrichten , pleite ist .
Doch in Amerika wird nicht mehr so viel getankt wie früher .
Autos verbrauchen weniger Benzin .
Die staatliche Mineralölsteuer von 18,4 Cent pro Gallone ( weniger als 4 Eurocent pro Liter ) ist seit 20 Jahren nicht gestiegen .
Politiker wagen bei hohen Spritpreisen nicht , die Steuer auch nur um einen Cent anzuheben .
„ Die Benzinsteuer ist einfach nicht zukunftsfähig “ , so Lee Munnich , ein Experte für Verkehrsgesetzgebung an der Universität von Minnesota .
Sein Bundesstaat hat kürzlich 500 Autos mit Fahrtenschreibern ausgerüstet , mit denen ein meilenbasiertes Bezahlsystem getestet werden soll .
„ Das stellt die langfristig sinnvollste Alternative dar “ , sagte er .
Bürokraten bezeichnen es als meilenbasierte Benutzergebühr .
Es überrascht nicht , dass die Idee bei städtischen Liberalen Anklang findet , denn die Steuer ließe sich beispielsweise dazu einsetzen , das Fahrverhalten so zu beeinflussen , dass Staus und klimaschädliche Abgase reduziert werden .
Die kalifornischen Planer setzen auf das System bei der Ausarbeitung von Strategien , mit denen die ambitionierten , gesetzlich verankerten Ziele des Bundesstaats zum Klimawandel erreicht werden sollen .
Doch der Republikaner Bill Shuster aus Pennsylvania , Vorsitzender des House Transportation Committee , hat ebenfalls erklärt , dass er darin die gangbarste langfristige Alternative sehe .
Auch die freien Vermarkter der Reason Foundation sind von der Idee angetan , Fahrer nach zurückgelegter Strecke zahlen zu lassen .
„ Das ist keine Steuer , die in einem schwarzen Loch verschwindet “ , erklärt Adrian Moore , Vizepräsident für Richtlinien bei Reason .
Die Leute bezahlen direkt für das , was sie bekommen .
Die Bewegung wird auch von zwei früheren amerikanischen Verkehrsministern unterstützt , die in einem Bericht im Jahr 2011 den Kongress aufgefordert hatten , sich in Richtung meilenbasierter Abrechnung zu bewegen .
Der US @-@ Senat genehmigte letztes Jahr ein 90 Millionen Dollar teures Pilotprojekt , das 10.000 Autos umfasst hätte .
Doch die Mehrheit im Repräsentantenhaus verhinderte den Vorstoß und reagierte damit auf die Bedenken von Abgeordneten aus ländlichen Gebieten , die Menschen vertreten , die im Alltag oft viele Meilen auf dem Weg zur Arbeit oder in die Stadt zurücklegen müssen .
Mehrere Bundesstaaten und Großstädte bewegen sich nichtsdestotrotz auf eigene Faust in diese Richtung .
Am engagiertesten ist Oregon , das derzeit 5.000 Fahrer für das größte Experiment des Landes anwirbt .
Diese Fahrer werden bald die Meilengebühren statt der Mineralölsteuer an den Bundesstaat zahlen .
Nevada hat bereits ein Pilotprojekt abgeschlossen .
New York City erwägt ebenfalls ein solches .
Illinois testet es in eingeschränktem Maße mit Lkws .
Und die I @-@ 95 @-@ Koalition , zu der die Verkehrsministerien von 17 Bundesstaaten an der Ostküste gehören ( einschließlich Maryland , Pennsylvania , Virginia und Florida ) , untersucht derzeit , wie man die Änderung einführen könnte .
Das Konzept ist kein universeller Hit .
In Nevada , wo vor kurzem 50 Freiwillige mit den Geräten ausgestattet wurden , waren Autofahrer skeptisch beim Gedanken , die Regierung könnte jede ihrer Bewegungen verfolgen .
„ Bedenken gegen Big Brother und derartige Dinge waren ein großes Problem “ , erklärt Alauddin Khan , Leiter des Strategie- und Ergebnismanagements im Verkehrsministerium von Nevada .
Die Leute wollten es nicht .
Als der Test anlief , warnte die ACLU von Nevada auf ihrer Website : „ Es wäre relativ einfach , die Fahrtenschreiber in ausgewachsene Überwachungsgeräte zu verwandeln . “
Es bestehe keine Notwendigkeit , eine gigantische , sperrige technologische Infrastruktur aufzubauen , die unweigerlich dazu verwendet werden würde , Daten über die täglichen Bewegungen von Einzelpersonen zu erfassen .
Nevada gehört zu einer Reihe von Bundesstaaten , die nun nach erschwinglicher Technologie Ausschau halten , mit der der Staat die gefahrenen Kilometer erfassen kann , aber nicht genau wann und wo .
Damit , so Khan , wäre auch die Öffentlichkeit beruhigter .
Die Jagd nach dieser Technologie hat einige Behörden zu einem kleinen Startup @-@ Unternehmen namens True Mileage in Kalifornien geführt .
Die Firma ist ursprünglich nicht angetreten , um Bundesstaaten bei der Besteuerung von Autofahrern zu helfen .
Vielmehr war es ihr Ziel , in einem aufstrebenden Markt für Kfz @-@ Versicherungen Fuß zu fassen , bei denen Fahrer auf Grundlage der gefahrenen Meilen zahlen sollen .
Doch die von ihr getesteten Geräte sind auch für die Straßenplaner interessant , denn sie arbeiten nicht mit GPS und liefern nur begrenzte Informationen , die regelmäßig per Modem hochgeladen werden .
„ Die Leute sind eher bereit , sich daran zu beteiligen , wenn ihre Geschwindigkeit und Standorte nicht aufgezeichnet werden “ , erklärte Ryan Morrison , Geschäftsführer von True Mileage .
In einigen dieser öffentlichen Pilotprogramme wurden große Fehler gemacht .
Es gibt wesentlich billigere und weniger intrusive Möglichkeiten , dies umzusetzen .
In Oregon experimentieren die Planer damit , Autofahrern eine Reihe von Auswahlmöglichkeiten zu geben .
Sie können sich für ein Gerät mit oder ohne GPS entscheiden .
Oder sie wählen überhaupt kein Gerät und zahlen stattdessen eine Pauschalgebühr auf Grundlage der durchschnittlich von allen Einwohnern des Bundesstaates gefahrenen Meilen .
Andere Stellen hoffen , das Konzept einer misstrauischen Öffentlichkeit verkaufen zu können , indem sie die Geräte mit mehr Funktionen ausstatten als mit wenigeren .
In New York City wollen Verkehrsbeamte ein Gerät zur Besteuerung entwickeln , mit dem sich auch Parkgebühren bezahlen lassen , eine Versicherung nur für gefahrene Kilometer bezahlt werden muss und Geschwindigkeitsdaten von anderen Fahrzeugen in Echtzeit erhoben werden , dank derer Autofahrer Staus ausweichen können .
„ Autofahrer würden durch den Mehrwert der Vorteile , die das System bietet , zur Teilnahme motiviert “ , heißt es in einem Planungsdokument der Stadt .
Einige Verkehrsplaner fragen sich allerdings , ob das ganze Gerede über das Bezahlen pro Meile nicht nur ein riesiges Ablenkungsmanöver sei .
Bei der Metropolitan Transportation Commission für das Gebiet der San Francisco Bay erklärten Beamte , der Kongress könne das Problem des bankrotten Highway Trust Fund einfach durch Erhöhung der Kraftstoffsteuer lösen .
Eine zusätzliche einmalige Gebühr oder eine jährliche Abgabe könnte Autofahrern mit Hybridfahrzeugen oder anderen Fahrzeugen , die wenig Benzin verbrauchen , auferlegt werden , sodass auch diese einen fairen Anteil zahlen .
„ Es gibt keinen Grund für eine Operation , wenn ein Aspirin auch ausreicht “ , erläutert Randy Rentschler , der Leiter für Gesetzgebung und öffentliche Angelegenheiten der Kommission .
Wenn wir das tun , machen sich Hunderte Millionen von Autofahrern sorgen über ihre Privatsphäre und zahlreiche andere Dinge .
Königsfeld : Kleine Mannschaft schlägt sich wacker
Die Freiwillige Feuerwehr bewältigte ihre Herbsthauptprobe trotz Personalmangels mit Bravour .
Nur elf Mann nahmen an der Übung teil .
Abteilungskommandant Hans Kammerer hatte sich in seiner Übungsannahme das Anwesen Feder in der Burgberger Straße ausgesucht .
Dort soll beim Sägen ein Kurzschluss entstanden sein .
Durch den entstehenden Brand und die Rauchentwicklung wurden zwei Menschen verletzt , einer davon konnte aber noch einen Notruf absenden .
Zwei Atemschutzträger der Wehr machten sich nach der ersten Überprüfung der Sachlage durch Hans Kammerer bereit , das Gebäude zu betreten .
Nach kurzer Zeit gelang es , die erste Person zu finden und ins Freie zu geleiten .
Die zweite Person musste getragen werden .
Dies war nicht so einfach , da auch eine enge Treppe zu überwinden war .
Das Gebäude , eine Werkstatt mit integrierter Stallung für zwei Pferde , war nicht einfach zu sichern .
Es lagerte viel Holz und auch Strohballen darin .
Weiter gab es noch elektrische Maschinen zur Holzbearbeitung .
Der erste Löschangriff erfolgte über den Tank im Fahrzeug .
Eine weitere Leitung erfolgte über einen Überflur- Hydranten in rund 100 Meter Entfernung .
Nun konnten drei Löschangriffe gestaltet werden .
Zum Einsatz kam auch im Gebäude ein Hohlstrahlrohr .
Hans Kammerer ging es bei der Übung auch darum aufzuzeigen , was mit wenig zur Verfügung stehendem Personal zu bewerkstelligen ist .
Im Ernstfall erfolgt eine Unterstützung über die Tageseinsatzgruppe Königsfeld .
Der Kommandant zeigte sich mit dem Ablauf der Übung zufrieden .
Vernetzung von Hochschulen und Firmen wichtig
Auf seinem Besuch im Landkreis Breisgau @-@ Hochschwarzwald ließ sich Landtagspräsident Guido Wolf auch in Titisee @-@ Neustadt darüber aufklären , woher die Arbeitskräfte von morgen kommen .
Im Förderzentrum Hochschwarzwald ging er zusammen mit den Geschäftsführenden Schulleitern der Beruflichen Schulen sowie des Kreisgymnasiums und den Elternbeiratsvorsitzenden dieser wichtigen Frage nach .
&quot; Bildung ist ein wichtiger Standortfaktor &quot; , unterstrich Claudia Stehle , Direktorin der Hans @-@ Thoma @-@ Schule , die das vernetzte Schulprojekt Bildungszentrum Hochschwarzwald vorstellte .
Dabei zeigte sich Wolf beeindruckt über die Modellprojekte zur Ausbildung .
Seit 2011 existiert in der Wälderstadt eine erfolgreiche Zusammenarbeit zwischen Förderzentrum , Kreisgymnasium und Berufsschulzentrum .
Außerdem lobte er die Familienfreundlichkeit im Landkreis .
&quot; Es ist wichtig , nicht nur die Familienphase im Blick zu haben , sondern aufgrund des demografischen Wandels auch die Phase um die Pflege der Betreuung von Angehörigen &quot; , erklärte Wolf .
Außerdem führte er an , dass sich immer mehr Beschäftigte um die Pflege und Betreuung ihrer Angehörigen kümmerten .
&quot; Ohne die Unterstützung der Arbeitgeber kann die daraus resultierende Belastung der Beschäftigten zu einer Beendigung des Arbeitsverhältnisses führen &quot; , sagte Wolf .
Aber niemand könne es sich leisten , qualifizierte Arbeitskräfte zu verlieren , sagte er weiter .
Ein weiterer , besonders wichtiger Faktor sei die Vernetzung von Hochschulen und Unternehmen .
&quot; Denn wer schon während seines Studiums die Vorzüge der Region kennengelernt hat , bleibt mit seinem erworbenen Wissen und seinen Fähigkeiten oft der regionalen Wirtschaft erhalten , was zur Stärkung der Region beiträgt &quot; , zeigte sich der Landtagspräsident überzeugt .
Denn nur wenn ausreichend Ausbildungsplätze angeboten würden , könne auch der Fachkräftebedarf gedeckt werden .
Seiner Meinung nach ist der Standortvorteil des Landkreises seine vorteilhafte Lage im Südwesten Deutschlands , in unmittelbarer Nähe zu Frankreich und zur Schweiz .
Außerdem erlebte er auf seiner Bahnfahrt von Titisee @-@ Neustadt nach Freiburg die bereits unternommenen Anstrengungen für den Ausbau des öffentlichen Personennahverkehrs .
&quot; Bleiben Sie weiterhin hartnäckig und sorgen Sie dafür , dass der öffentliche Nahverkehr besser wird &quot; , erklärte er an die Adresse der anwesenden Kommunalpolitiker .
Mit Musik einen unterhaltsamen Nachmittag erlebt
Bereits seit 15 Jahren lädt die Familie Kaul die Dietinger Senioren zu Kaffee , Kuchen und danach zu einem Vesper ein .
Früher wurden die älteren Mitbürger in der Raststätte bewirtet .
Mittlerweile findet dieser Nachmittag im Pflegeheim St. Josef statt .
Die Heimbewohner freuten sich auf die leckeren Kuchen und Torten .
Später gab es Wurstsalat .
Mit gängigen Melodien unterhielten Silvia Kimmich @-@ Bantle und ihr Vater Karl Kimmich .
Die über 100 Jahre alte Natursteinmauer als vordere Abgrenzung des vor der Sanierung stehenden alten Schulhofes zur Kirchstraße soll erneut mit auf den Sanierungskostenplan der Stadt Bräunlingen gesetzt werden .
In den Tagen vor der Kilbig wurde bei den ersten Arbeiten der Sanierung des vorderen Schulhofes eine kleine Winkelmauer , zur Stabilisierung und statischen Entlastung der über einhundert Jahre alten Natursteinwand mit Balustrade eingebaut .
Das weitere Vorgehen sieht vor , so Alexander Misok vom Bräunlinger Stadtbauamt , das Landesdenkmalamt in die Planungen mit einzubeziehen und ein Sanierungskonzept für die alte Mauer zu erstellen .
Danach soll eine Kostenberechnung durch Fachleute vorgenommen werden , die dann dem Gemeinderat zur Entscheidung und Festlegung des weiteren Vorgehens auf den Tisch gelegt werden soll .
Eine Entscheidung darüber wird voraussichtlich bereits im kommenden Jahr fallen .
Nach der Sanierung , Pflasterung und Baumbepflanzung des alten Schulinnenhofes innerhalb der beiden Seitenflügel der 1912 erbauten Schule muss in absehbarer Zeit als Folgemaßnahme , die sanierungsbedürftige Begrenzungsmauer von Grund auf saniert und auf neuen Unterbau gestellt werden .
Die historische , einhundert Jahre alte Abgrenzungsmauer des alten Schulhofes zur Kirchstraße , ist vor allem durch Wasser- und Frostschäden , da keine Drainage vorhanden ist , sanierungsbedürftig und hat eine Bogenneigung nach vorne .
Tiefe Risse in einzelnen Steinen zeugen von Witterungsschäden , jedoch ist die Mauer derzeit nicht einsturzgefährdet .
Eine standsichere Mauer ist Voraussetzung für einen von Schülern benutzen Schulhof , was durch die aktuellen Befestigungsarbeiten erfolgt ist .
Ursprünglich war die Schulhofsanierung sogar schon in den Jahren 2008 / 2009 geplant , doch hohe unplanmäßige Ausgaben brachten eine Verschiebung .
Ein wichtiges Wort bei der historischen Schulmauersanierung , die sogar schon für Filmaufnahmen benutzt wurde , wird das Landesdenkmalamt mitsprechen .
Sollten Vorgaben von dieser Seite kommen , dann hofft die Stadt Bräunlingen auf Zuschüsse von den Denkmalschützern .
Die Schüler der Bräunlinger Grundschule , die inzwischen wieder in einem gut sanierten alten Schulgebäude mit neuer Aula unterrichtet werden , können bald den alten Schulhof benutzen .
Özdemir will Jazzausbildung in Stuttgart erhalten
In die anhaltenden Diskussionen um die Zukunft der Musikhochschulen in Baden @-@ Württemberg hat sich nun auch Cem Özdemir , Bundesvorsitzender der Grünen , eingeschaltet .
&quot; Ich halte es für falsch , die ganzheitliche Ausbildung in der Musikhochschule Stuttgart aufzugeben &quot; , sagte Özdemir den &quot; Stuttgarter Nachrichten &quot; .
Jazz und Klassik gehören gerade am Jazzstandort Stuttgart zusammen .
Damit widerspricht Özdemir , der in Stuttgart als Favorit für ein Direktmandat bei der Bundestagswahl am 22. September gilt , der Grün @-@ Roten Landesregierung .
Diese forciert auf der Basis einer Expertenstudie eine Neuordnung der fünf Musikhochschulen in Baden @-@ Württemberg .
Danach soll unter anderem der Studiengang Jazz und Pop von der Musikhochschule Stuttgart an die Musikhochschule Mannheim verlagert werden .
US @-@ Grenze : &quot; Super @-@ Tunnel &quot; zum Drogenschmuggel entdeckt
An der Grenze zwischen Mexiko und den USA haben Ermittler einen &quot; Super @-@ Tunnel &quot; zum Drogenschmuggel entdeckt und stillgelegt .
Wie die US @-@ Zollbehörden mitteilten , war die mehr als 500 Meter lange Röhre zwischen Tijuana und San Diego mit Elektrizität , Bahngleisen und einer Belüftungsanlage ausgestattet .
Drei Verdächtige wurden demnach festgenommen , acht Tonnen Marihuana sowie fast 150 Kilogramm Kokain beschlagnahmt .
Der Tunnel war den Angaben zufolge noch nicht in Gebrauch genommen worden .
&quot; Diese Kartelle sind dumm , wenn sie meinen , sie könnten sich unter dem Radar hinweg durchgraben &quot; , sagte die Generalstaatsanwältin des US @-@ Distrikts Southern California , Laura Duffy , bei einer Pressekonferenz vor einem Lagerhaus in San Diego , wo das eine Ende des Tunnels entdeckt worden war .
An die Drogenbanden gewandt versicherte Duffy : &quot; Wenn Ihr weiter solche Tunnel baut und versucht , sie zu nutzen , sind wir entschlossen , das zu einer riesigen Verschwendung Eures schmutzigen Geldes zu machen &quot; .
Sowohl die US @-@ Behörden als auch die mexikanischen Sicherheitskräfte befinden sich in einem Dauer @-@ Kampf gegen die Drogenkartelle .
Seit 2006 wurden in Mexiko mehr als 77. 000 Menschen im Zusammenhang mit der Drogenkriminalität getötet .
Von Experten konstruiert
Wegen der aufwendigen Ausstattung des Tunnels gehen die Ermittler davon aus , dass er von Architekten und Ingenieuren konstruiert wurde und dass der Bau rund ein Jahr in Anspruch nahm .
Die Gleisanlage war so ausgestattet , dass dort elektrisch betriebene Wagen eingesetzt werden konnten .
Auf mexikanischer Seite liegt der Zugang in einem Gebäude , das 80 Meter von der Grenze entfernt ist .
Laut Behörden führt eine Leiter 20 Meter in die Tiefe zum eigentlichen Tunneleingang .
Der Tunnel hat einen Querschnitt von 1,20 Meter Höhe und 90 Zentimeter Breite .
Er wäre damit auch geeignet gewesen , um die illegale Einwanderung Richtung USA zu fördern .
Zwei der Verdächtigen wurden in Zusammenhang mit dem Kokain @-@ Fund festgenommen .
Der Dritte , ein Mexikaner , wurde wegen des beschlagnahmten Marihuanas gefasst .
Allen dreien droht als Höchststrafe lebenslanger Freiheitsentzug , wie Beamte sagten .
Seit 2006 seien acht derartige Tunnel entdeckt worden , hieß es auf der Pressekonferenz in San Diego weiter .
Es sei aber das erste Mal , dass in einem solchen Tunnelbau Kokain gefunden wurde .
Normalerweise wird Kokain in kleineren Mengen und nicht durch Tunnel geschmuggelt .
Dies zeige die &quot; Verzweiflung &quot; der Drogenbanden , deren traditionelle Routen inzwischen abgeschnitten seien , sagte Bill Sherman von der Drogenfahndung DEA in San Diego .
Sie würden alles tun , um in die USA zu gelangen .
Zu den Festgenommenen wurden keine Einzelheiten bekannt gegeben , zumindest einer sei Mexikaner , hieß es .
Sie müssen mit Haftstrafen bis zu zehn Jahren rechnen .
2014 wird Geisinger Festjahr
Das Jubiläum der Stadt Geisingen anlässlich der 1250 .
Wiederkehr der ersten urkundlichen Erwähnung rückt immer näher .
Wenn in gut acht Wochen das Jahr zu Ende geht , steht das Jubiläumsjahr an .
Geisingen und Kirchen @-@ Hausen wurden 794 erstmals urkundlich zusammen erwähnt .
In Kirchen wurde eine Urkunde gefertigt , in der beide Orte erwähnt sind .
Am 15. März soll es einen offiziellen Auftakt zum Jubiläumsjahr geben , und da Geisingen derzeit keine Halle hat , findet diese Auftaktveranstaltung in dem Ort statt , wo vor 1250 Jahren beide erstmals erwähnt wurde , in Kirchen @-@ Hausen .
Im Rahmen des Jubiläums sind etliche Veranstaltungen sowohl in Geisingen , als auch in Kirchen @-@ Hausen geplant .
Kirchen @-@ Hausen wird im Juli an einem Festwochenende vom 18. bis 20. Juli die 1250 .
Wiederkehr feiern .
Am Freitag mit einem Festakt , am Samstag und Sonntag mit einem Fest rund um die Kirchtalhalle .
An diesem Festwochenende ist außerdem noch das Kirchen @-@ Hausener Kirchenfest .
Stadtmusikdirektor Rudolf Barth hat für die Stadt anlässlich des Jubiläums eine Auftragskomposition geschrieben , die an drei Terminen aufgeführt wird .
Am 21. Juni zusammen mit der Sonnwendfeier des Schwarzwaldvereins , am 12. Juli in der Arena mit Feuerwerk und am 13. Dezember als erstes Konzert der Stadtmusik in der neuen Festhalle .
Diese wird im Jubiläumsjahr fertig und eingeweiht , der offizielle Termin ist am letzten Septemberwochenende , am 27. und 28. September .
Anlässlich des Geisinger Stadtjubiläums wird auch noch eine neue Chronik herausgebracht .
&quot; Es soll aber eine Chronik nicht nur von Geisingen selbst werden , sondern ein gedrucktes Werk über das Geisingen von heute , das eben aus Geisingen , Kirchen @-@ Hausen , Leipferdingen , Aulfingen und Gutmadingen besteht &quot; , so Bürgermeister Walter Hengstler .
Und auch das Geisingen von heute feiert 2014 Geburtstag , 1974 wurde die heutige Raumschaft mit den Eingemeindungen vollzogen .
Die neue Chronik soll dann am 21. oder 22. November in der neuen Festhalle in Geisingen vorgestellt werden .
2014 ist aber auch sonst ein Jahr mit vielen Jubiläen .
Die Narrenzunft Strohglonki beginnt am 8. Februar mit einem Brauchtumsabend anlässlich ihres 60 @-@ jährigen Bestehens , die Harmonie Gutmadingen wird 90 Jahre und hat am 29. März das Festbankett und feiert dann vom 1. bis 4. Mai das Bezirksmusikfest .
Das Altenwerk Leipferdingen wird 40 Jahre alt , die Geisinger Schule ist seit 50 Jahren am neuen Standort und feiert dies am 10. Mai , der Musikverein Polyhymnia Leipferdingen wird 150 Jahre alt und feiert dies im Rahmen des Brunnenfestes vom 4. bis 7. Juli .
Die Stadt Geisingen wurde in einer Schenkungsurkunde , die im Besitz des Klosters St. Gallen ist , im Jahre 764 erstmals urkundlich erwähnt .
Die Urkunde wurde in Kirchen ( Hausen ) gefertigt , das damals Gerichtsplatz war .
Beide Gemeinden sind demnach in der gleichen Urkunde erwähnt .
Grund 2014 dieses 1250 @-@ jährige entsprechend zu feiern , zusätzlich liegt auch noch die Gemeindereform 40 Jahre zurück .
Rat nimmt Gleisanlagen ins Visier
Soll der Bahnübergang &quot; Am Hirschen &quot; aufwändig umgebaut werden , um die Verkehrssicherheit zu erhöhen ?
Ja , haben die Gemeinderäte beschlossen .
Schiltach muss dafür 220 000 Euro in die Hand nehmen .
Die Deutsche Bahn will im kommenden Jahr die Kinzigtal @-@ Bahnstrecke verbessern .
Besonders soll dabei die Sicherheit an Bahnübergängen erhöht werden - regelmäßig kommt es bundesweit zu Kollisionen von Zügen mit anderen Fahrzeuge .
Stimmen die Gemeinden den Umbaumaßnahmen zu , müssen sie sich mit einem Drittel an den Kosten beteiligen , den Rest teilen sich Bahn und Bund .
Schiltachs Stadtbaumeister Roland Grießhaber erläuterte dem Gemeinderat die Besonderheiten des Bahübergangs &quot; Am Hirschen &quot; .
Dort plant die Stadt , in Höhe des dortigen Tunnelmundes westlich der Bahngleise eine Ausbuchtung zu bauen .
Dort könnten auch größere Fahrzeuge , zum Beispiel solche , die Langholz transportieren , bei Gegenverkehr stehen , ohne die Gleise blockieren zu müssen .
Grießhaber schlug daher vor , eine erforderliche Stützmauer so zu konstruieren , dass die Stadt die anschließende Straße zu gegebener Zeit verbreitern könne , um einen reibungslosen Verkehrsfluss zu gewährleisten .
Dies wurde im Gemeinderat kontrovers diskutiert , da einige Räte die Notwendigkeit einer Straßenverbreitung in Zweifel zogen : Thomas Kipp brachte mit seiner Äußerung die Stimmung der Kritiker auf den Punkt : &quot; Müssen wir wegen so wenigen Fahrzeugen so viel Geld in die Hand nehmen ? &quot;
Bürgermeister Thomas Haas widersprach : Der Bahnübergang &quot; Hirschen &quot; werde regelmäßig für Langholztransporte genutzt .
Selbst Holz aus dem Bereich &quot; Kuhbach &quot; werde teilweise über diese Strecke transportiert , weil die bis zu 20 Meter langen Fahrzeuge die Strecke an der Häberlesbrücke nicht nutzen könnten , weil sie dort nicht in die Hauptstraße abbiegen könnten .
Darüber hinaus diene die Strecke als Umleitungfür diejenigen Fahrzeuge , die den Tunnel nicht benutzen dürfen , wenn die Hauptstraße gesperrt ist , argumentierte Haas .
Da abzusehen sei , dass Kirchberg- und Schlossbergtunnel umgebaut und saniert werden müssten , wie dies derzeit in Wolfach der Fall ist , könne dem Bahnübergang &quot; Am &quot; Hirschen &quot; auch für einen längeren Zeitraum eine wichtige Verkehrsbedeutung zukommen .
Die Räte kamen überein , untersuchen zu lassen , welche Kosten die angedachte Verbreiterung der Straße verursachen würde .
Ungeachtet dessen wurde dem Umbau des Bahnübergangs mehrheitlich zugestimmt mit der Maßgabe , dass die erforderliche Stützmauer so gebaut wird , dass die Stadt die anschließende Straße Richtung &quot; Bahnhofstraße &quot; gegebenenfalls für Begegnungsverkehr auf rund 5,5 Meter ausbauen könne .
Der Umbau des Bahnübergangs bei der Gerberei Trautwein könnte dagegen ein ganz anderes Problem nach sich ziehen , das die Zufahrt in den stark ansteigenden &quot; Geroltzhäuser Weg &quot; betrifft .
Die Verwaltung hatte die Umbaupläne der Bahn vom Ingenieurbüro Breinlinger untersuchen lassen , da sie Zweifel daran hatte , ob der geplante Anschluss des Geroltzhäuser Wegs dann noch ohne weiteres möglich sei .
Die Untersuchung kam zu dem Ergebnis , dass nicht auszuschließen sei , dass die Neigungsverhältnisse der Straße dazu führen könnten , dass längere Fahrzeuge aufsitzen .
Die Verantwortung hierfür trage wiederum die Stadt als Straßenbaulastträgerin .
Der Umbau könne demnach Haftungsstreitigkeiten nach sich ziehen .
Da sowohl die Holzabfuhr als auch das Abbiegen im aktuellen Ausbauzustand funktionierten , solle man dem Umbau des Bahnübergangs nicht zustimmen , argumentierte Haas .
Auch sei an dieser Stelle das Risiko einer Kollision des Zuges mit einem auf dem Übergang stehenden Fahrzeug deutlich geringer als an den anderen Bahnübergängen , weil sich direkt daneben der Haltepunkt Mitte befinde , zu dem eine gute Sichtverbindung bestehe .
Selbst Züge vom Hauptbahnhof her müssten an dieser Stelle schon soweit abgebremst sein , dass keine Kollision drohe .
Mehrheitlich wurde dem Umbau dieses Bahnübergangs die Zustimmung verweigert , da die Stadt Schiltach das Problem mit aufsitzenden Fahrzeugen &quot; ausbaden müsste &quot; , so die Räte , da sich die Bahn nach Abschluss der Bauarbeiten aus der Verantwortung zurückziehen könne .
Als unproblematisch betrachtet das Gremium die Umbauten an den Bahnübergängen &quot; Vor Heubach &quot; und &quot; Vor Kuhbach &quot; , für die bereits Kreuzungsvereinbarungen mit der Bahn getroffen wurden .
Esa entscheidet über große Weltraummissionen : Missionen für Milliarden
Ferne Planeten , Gravitationswellen oder schwarze Löcher - Experten der europäischen Raumfahrtagentur müssen sich jetzt auf zwei Großprojekte einigen , die sie in den nächsten Jahren starten wollen .
30 Vorschläge standen zur Auswahl , fünf sind noch im Rennen .
Ferne Welten .
Mehr als 1000 Planeten bei anderen Sternen haben Astronomen bereits gefunden .
Ob es zumindest auf einigen davon Leben gibt , weiß keiner .
Die Auswahl fällt schwer : Soll man nach Gravitationswellen suchen ?
Oder lieber den Ursprung des Kosmos erforschen ?
Oder nach erdähnlichen Planeten fahnden und damit vielleicht außerirdisches Leben entdecken ?
Diese Fragen stellen sich gerade die Verantwortlichen der europäischen Raumfahrtagentur Esa .
Für ihr Programm &quot; Cosmic Vision &quot; suchen sie Ideen für zwei große Raumfahrtprojekte , die die Forschung entscheidend voranbringen sollen .
Der Etat für solche &quot; L @-@ Missionen &quot; liegt jeweils etwa bei einer Milliarde Euro .
Der Start wird voraussichtlich 2028 und 2034 sein .
Anfang September traf sich in Paris die Elite der europäischen Weltraumforschung , um Vorschläge für solche Missionen zu diskutieren .
30 Ideen standen zur Debatte , fünf davon sind nun in die engere Wahl gekommen .
Zahlreiche Gremien begutachten die Vorschläge , haken bei den Forschern nach .
In den nächsten Tagen soll eine endgültige Entscheidung durch das wissenschaftliche Programmkomitee fallen .
Insgesamt vier große Fragen hat die Esa ausgewählt , auf welche die Missionen des 2007 initiierten Programms &quot; Cosmic Vision &quot; Antworten finden sollen .
Was sind die Bedingungen für die Entstehung von Planeten und Leben ?
Die genauen Vorgänge bei der Entstehung von Sternen aus großen Gaswolken - und damit auch der Entstehung von Planeten , die diese Sterne umkreisen - liegen immer noch im sprichwörtlichen Dunkeln .
Ein großes Infrarotteleskop im All könnte dieses Dunkel durchdringen .
Und wenn ein Stern Planeten besitzt , unter welchen Umständen kann dort Leben entstehen ?
Um dieser Frage nachzugehen , soll 2017 das Weltraumteleskop &quot; Cheops &quot; starten , mit dem 500 bereits bekannte Planetensysteme in unserer näheren Umgebung genauer untersucht werden .
Die Möglichkeiten sind aber begrenzt , Cheops ist eine kleine Mission mit einem Budget von 150 Millionen Euro .
Mit größeren Instrumenten könnten die Astronomen erdähnliche Planeten abbilden und sogar die Zusammensetzung ihrer Atmosphären analysieren und so nach &quot; Biomarkern &quot; suchen : Gasen , die als Indiz für biologische Aktivität gelten .
Wie funktioniert das Sonnensystem ?
Auch diese Frage soll letztlich Aufschluss darüber geben , welche Voraussetzungen es für die Entstehung von Leben gibt .
Eine wichtige Rolle spielt die magnetische Aktivität eines Sterns und die Wechselwirkung seines Magnetfelds sowie der von ihm ausgehenden Teilchenstrahlung mit dem Planetensystem .
In unserem Sonnensystem lassen sich diese Vorgänge exemplarisch untersuchen .
Mit dem &quot; Solar Orbiter &quot; hat die Esa bereits eine Mission der M @-@ Klasse ( dort liegt das Budget bei etwa einer halben Milliarde Euro ) für diese Frage bewilligt .
Die Sonde soll 2017 starten und Oberfläche und Aktivität der Sonne genau beobachten .
Von großem Interesse für die Forscher sind auch Jupiter und seine Monde .
Sie wollen herausfinden , welche Rolle der Riesenplanet bei der Entwicklung des Sonnensystems gespielt hat .
Dafür sieht die Esa die erste der insgesamt drei L @-@ Missionen des &quot; Cosmic Vision &quot; -Programms vor .
Die Sonde &quot; Juice &quot; ( Jupiter Icy Moons Explorer ) beginnt ihre Reise voraussichtlich 2022 .
Acht Jahre später erreicht sie Jupiter und soll die Atmosphäre des Planeten sowie die eisigen Monde Europa , Kallisto und Ganymed untersuchen .
Was sind die grundlegenden physikalischen Gesetze des Universums ?
Das Weltall bietet viele Möglichkeiten , Materie unter extremen Bedingungen zu studieren und so zu untersuchen , ob die uns bekannten Naturgesetze dort immer noch gültig sind .
Vielleicht finden sich auch Abweichungen , die den Physikern den Weg zu einer neuen Theorie weisen könnten , unter deren Dach sich alle bekannten Naturgesetze vereinen lassen .
Wie ist das Universum entstanden und woraus besteht es ?
Vor 13,7 Milliarden Jahren entstand unser Kosmos durch den Urknall .
Neben der uns geläufigen Materie , aus der Sterne , Planeten und Lebewesen wie wir bestehen , gibt es Dunkle Materie , deren Schwerkraft Galaxien und Galaxienhaufen zusammenhält , und Dunkle Energie , durch deren Wirken sich die Expansion des Weltalls beschleunigt .
Bislang wissen die Forscher weder , welche physikalischen Gesetze in den ersten Sekundenbruchteilen des Urknalls gültig waren , noch woraus Dunkle Materie und Dunkle Energie bestehen .
Mit &quot; Euclid &quot; hat die Esa auch hier bereits eine M @-@ Mission bewilligt , deren Start für 2020 vorgesehen ist .
Mit einem speziellen Teleskop soll die Sonde die Verteilung der Materie im Universum erstmalig am gesamten Himmel untersuchen und so Rückschlüsse auf die Beschaffenheit von Dunkler Materie und Dunkler Energie ermöglichen .
Wer das Rennen machen könnte
Von den 30 Vorschlägen werden am Ende des Auswahlverfahrens nur zwei übrig bleiben .
Die besten Chancen auf eine Bewilligung als L @-@ Mission hat nach Meinung vieler Experten &quot; E @-@ Lisa &quot; , ein anspruchsvolles Konzept zum Nachweis von Gravitationswellen .
Darunter verstehen Physiker Änderungen in der Struktur der Raumzeit , die Albert Einstein vor fast 100 Jahren vorausgesagt hatte .
Nachgewiesen wurden sie bis heute nicht .
Elisa könnte das schaffen , hoffen die Wissenschaftler hinter dem Projekt .
Die Mission sieht einen aus zwei oder drei Sonden bestehenden Detektor vor , der im All stationiert wird .
Er könnte im Gegensatz zu Anlagen auf der Erde auch Gravitationswellen nachweisen , die beim Urknall entstanden sind , und so neue Erkenntnisse über die Entstehung des Kosmos liefern .
Vier weitere Vorschläge konkurrieren noch um die zweite L @-@ Mission : ein großes Röntgenteleskop namens &quot; Athena &quot; , das unter anderem schwarze Löcher erforschen soll , &quot; Icy Planets &quot; , eine weitere Mission zu den äußeren Planeten des Sonnensystems , &quot; Prism &quot; , eine Mission zur Vermessung der kosmischen Hintergrundstrahlung , und der &quot; Exoplanet Finder &quot; , der erdähnliche Planeten aufspüren und untersuchen soll .
Bereits ausgeschieden sind unter anderem Vorschläge zum Proben @-@ Rücktransport vom Mars , zur Erforschung von Mond , Venus und Asteroiden sowie zur Sonnenphysik .
Snowden bereit , mit Deutschland in Bezug auf US @-@ Überwachung zu „ kooperieren “
Edward Snowden , der Whistleblower des US @-@ amerikanischen Geheimdienstes , hat erklärt , er sei bereit , nach Berlin zu reisen und vor dem deutschen Bundestag auszusagen , wenn die amerikanische National Security Agency und ihr Direktor Keith Alexander keine Antworten über ihre Aktivitäten geben .
Der deutsche Abgeordnete Hans @-@ Christian Ströbele traf Snowden am Donnerstag in Russland , wo dieser Asyl erhalten hat , um mit ihm die Aussage in Deutschland zu besprechen .
In einem Brief von Snowden , der am Freitag von Ströbele den Medien in Berlin präsentiert wurde , schreibt dieser : „ Auch wenn das Ergebnis meiner Bemühungen nachweislich positiv war , behandelt meine Regierung eine abweichende Meinung weiterhin als Treuebruch und versucht , politische Meinungsäußerung mit Strafandrohung zu kriminalisieren , bei der keine Verteidigung möglich ist . “
Die Wahrheit zu sagen ist aber kein Verbrechen .
In dem Brief schreibt Snowden , er sei davon überzeugt , dass die Unterstützung der internationalen Gemeinschaft die amerikanische Regierung davon überzeugen könne , die Anklage gegen ihn fallen zu lassen .
Die vom US @-@ Justizministerium erhobene Anklage umfasst Spionage und Diebstahl von Staatseigentum .
Der deutsche Innenminister Hans @-@ Peter Friedrich sagte gegenüber Zeit Online : „ Wenn Herr Snowden bereit ist , mit deutschen Vertretern zu sprechen , dann finden wir Wege , das zu ermöglichen . “
Die Beziehungen zwischen den USA und Deutschland sind durch die Behauptungen belastet , die NSA habe das Handy von Kanzlerin Angela Merkel abgehört .
Thomas Oppermann , der Abgeordnete , der den für den Geheimdienst zuständigen parlamentarischen Ausschuss leitet , erklärte , man solle die Gelegenheit ergreifen , Snowden als Zeuge anzuhören , wenn dies möglich sei , „ ohne ihn zu gefährden und die Beziehungen zu den USA völlig zu ruinieren “ .
Ströbele , ein Abgeordneter der Grünen , veröffentlichte ein Bild von sich und Snowden in seinem Twitter @-@ Feed .
Er wurde bei seinem Besuch in Russland von zwei deutschen Journalisten begleitet .
Ströbele erklärte , dass laut dem Anwalt des früheren NSA @-@ Mitarbeiters Snowden nicht nach Russland zurückkehren könne , wenn er das Land verlasse .
Wenn Snowden in Deutschland aussage , dann benötige er eine Zusicherung , dass er dort „ sicher “ sei , so der Abgeordnete .
Snowden erklärt in seinem Brief , dass er sich einer „ ernsthaften und fortlaufenden “ Verfolgungskampagne ausgesetzt sähe , die ihn aus seiner Heimat vertrieben habe .
Er sei jedoch berührt von der weltweiten Reaktion auf „ meinen Akt der politischen Meinungsäußerung “ .
Bürger auf der ganzen Welt sowie hochrangige Politiker – auch in den Vereinigten Staaten – haben die Enthüllungen über ein unkontrolliertes System umfassender Überwachung als ein Verdienst an der Allgemeinheit bezeichnet .
In seinem Brief macht Snowden den deutschen Behörden ein Angebot der Zusammenarbeit , „ wenn die Schwierigkeiten rund um die humanitäre Situation gelöst wurden “ .
Frontier Airlines erhebt Gebühren für Handgepäck
Frontier Airlines plant , bis zu 100 US @-@ Dollar von Passagieren zu verlangen , die auf ihrem Flug Handgepäck verstauen möchten .
Frontier Airlines beabsichtigt , bis zu 100 US @-@ Dollar für ein Stück Handgepäck und 2 Dollar für Kaffee oder Limonade zu berechnen , auch wenn in der Ankündigung am Mittwoch zu lesen war , dass Passagiere die ganze Dose behalten dürften .
Die neue Gebühr gilt für Handgepäck im Gepäckfach über dem Sitz , kleine Taschen unter dem Sitz sind weiterhin kostenlos .
Frontier erklärte , man berechne 25 US @-@ Dollar , wenn die Gebühr im Voraus bezahlt werde , und 100 US @-@ Dollar bei Reisenden , die erst am Flugsteig zahlten .
Frontier @-@ Sprecherin Kate O &apos; Malley sagte , die Gebühr von 100 US @-@ Dollar ziele darauf ab , Reisende zu bewegen , sich im Vorfeld um die Zahlung zu kümmern .
„ Wir möchten diese Summe nicht berechnen “ , erklärte sie .
Fluggesellschaften begannen 2008 damit , für das erste und zweite aufgegebene Gepäckstück Gebühren zu verlangen .
Passagiere , die versuchten , diese zu umgehen , haben deshalb soviel wie möglich ins Handgepäck gestopft , was zur Folge hat , dass die Gepäckfächer über dem Sitz häufig überfüllt sind .
Gebühren sind eine Möglichkeit , Passagiere dazu zu bewegen , weniger mit an Bord zu nehmen .
O &apos; Malley sagte , bei der neuen Gebühr gehe es nicht wirklich darum , Geld zu verdienen .
Es gehe um die treuesten Kunden von Frontier , die deutlich zum Ausdruck gebracht hätten , dass es immer schwerer werde , Platz im Fach über dem Sitz zu finden .
Passagiere , die Ihre Tickets auf der Website der Fluggesellschaft kaufen , müssen nicht bezahlen .
Das bedeutet , dass ein Passagier am Flugsteig von Frontier unter Umständen ein Gepäckstück kostenlos mitnehmen darf , die nächste Person aber 100 Dollar für ein vergleichbares Gepäckstück bezahlen muss .
O &apos; Malley erklärte , die Website von Frontier und die Check @-@ in @-@ Verfahren würden geändert , sodass die Passagiere über die Gebühr informiert seien , ehe sie zum Flugsteig kämen .
Die neue Handgepäckgebühr von Frontier tritt erst im Sommer in Kraft , ein genaues Datum gibt es noch nicht .
Passagiere schimpfen häufig über Gepäckzuschläge und andere Gebühren , doch Fluggesellschaften greifen gern darauf zurück .
Sie argumentieren , dass der Transport des Gepäcks Geld koste und Passagiere diesen Service bezahlen sollten , wenn sie ihn wünschten .
Viele an der Wall Street betrachten die neuen Gepäckgebühren als Zeichen dafür , dass die Fluggesellschaften genug Geld einnehmen , um nach Jahren der Verluste die Kosten von Flugreisen zu decken .
Die meisten lassen bislang jedoch die Finger von Gebühren für Handgepäck .
Spirit Airlines Inc. verlangte vor drei Jahren als Erste Gebühren für Handgepäck und später folgte Allegiant Air , ebenfalls ein Billigflieger .
Die einzige andere Fluggesellschaft mit einer derartigen Gebühr sei die ungarische Wizz Air , erklärte der Airline @-@ Berater Jay Sorensen , der die Zusatzgebühren aufmerksam verfolgt .
Er schätzte in einem Bericht vom Dezember 2011 , dass die Handgepäckgebühr Spirit jährlich 50 Millionen US @-@ Dollar einbringe .
Sorensen , der früher eine Führungsposition bei Midwest Airlines innehatte , ist kürzlich mit Spirit geflogen und war neugierig , was ihm am Flugsteig erwarten würde , wenn Passagiere mit der ungewöhnlichen Handgepäckgebühr des Unternehmens konfrontiert würden .
„ Der Boarding @-@ Prozess gehörte zu den reibungslosesten , die ich in meiner Laufbahn in der Luftfahrt erlebt habe “ , sagte er .
Ich erwartete , Zähneknirschen und handgreifliche Diskussionen am Flugsteig zu sehen .
„ Das Flugzeug war voll “ , erklärte er , „ und das Boarding lief wie geschmiert . “
Frontier folgt Spirit auch bei den 2 Dollar , die für Kaffee , Tee , Limonade oder Saft verlangt werden .
Das Unternehmen erklärte , dass Passagiere , die Limonade oder Saft kauften , die ganze Dose behalten dürften und Kaffee gratis nachgefüllt werde .
Wasser ist weiterhin kostenlos .
US Airways hatte 2008 kurzzeitig versucht , für Erfrischungsgetränke Geld zu verlangen , machte dies aber sieben Monate später wieder rückgängig , nachdem sich Passagiere beschwert hatten und keine andere große Gesellschaft nachgezogen war .
Frontiers Schritt , Gebühren für das Handgepäck zu erheben , wenn Passagiere nicht direkt bei der Fluggesellschaft kaufen , ist die jüngste Initiative , mit der Kunden auf die eigene Website gelenkt werden sollen .
Fluggesellschaften bezahlen Online @-@ Reisebüros wie Orbitz 10 bis 25 US @-@ Dollar pro verkauftem Ticket .
Das liefert allen Gesellschaften einen Anreiz , Passagiere zum Direktkauf bei ihnen zu bewegen statt über ein Online @-@ Reisebüro .
Frontier ist in diesem Bereich allerdings am weitesten gegangen .
Im September begann das Unternehmen damit , bei Buchung über ein Online @-@ Reisebüro nur noch halb so viele Vielfliegermeilen zu vergeben .
Am Mittwoch wurden die Meilen noch einmal auf 25 Prozent der Flugstrecke gekürzt .
Eine bei einem Drittanbieter gebuchte Flugreise mit Frontier über 1000 Meilen bringt Kunden deshalb nur noch 250 Meilen ein .
Passagiere können auch ausschließlich beim Direktkauf auf der Website von Frontier Plätze reservieren .
Frontier verfügt über einen treuen Kundenstamm an seinem Sitz in Denver , doch das Geschäft schrumpft und das Unternehmen verliert Geld .
Der Erlös ging um 9 Prozent zurück und die Flugkapazität schrumpfte knapp 13 Prozent im ersten Quartal , wie im Finanzbericht zu lesen ist , der am Mittwoch von dem Mutterkonzern , Republic Airways Holdings Inc . , veröffentlicht wurde .
Republic hat versucht , im Rahmen des Verkaufs der Gesellschaft die Finanzen von Frontier in den Griff zu bekommen .
Sprichwörter kommen aus der Bibel
Gut 40 Frauen besuchten das letzte Frauenfrühstück dieses Jahres in der evangelischen Kirchengemeinde Bisingen .
Thema des Tages im Gemeindehaus waren &quot; Sprichwörter aus der Bibel &quot; und &quot; Redewendungen aus dem Mittelalter &quot; .
Zita Köhler , die Vorsitzende des Kirchengemeinde- rats , ging nach dem Frühstück in einem Vortrag auf die biblischen Sprichwörter ein .
&quot; Sprichwörter enthalten Lebensweisheiten , Vorschriften oder Warnungen &quot; , erklärte sie .
Sie verglich mehrere Sprichwörter mit den entsprechenden Bibelstellen und erklärte die Bedeutung .
Sie nannte Sprichwörter wie : Holzauge sei wachsam , wie Schuppen von den Augen fallen , ein Auge auf jemand werfen , den Seinen gibt &apos; s der Herr im Schlaf , seine Hände in Unschuld waschen .
Mehrmals ließ die Referentin ihre Zuhörer auch raten , um welches Sprichwort es sich handelte .
Der Redewendungen aus dem Mittelalter nahm sich die Kirchengemeinderätin Christel Dehner an : Aller guten Dinge sind drei , blau machen , etwas verhauen .
Sie erklärte Bedeutung und Herkunft der Redewendungen , die sie &quot; Brücken in die Vergangenheit &quot; nannte .
Zum Abschluss wurde eine Tombola verlost .
Die Preise lagen zugedeckt auf einem Tisch und wurden humorvoll umschrieben , bevor sie an die Gewinner übergeben wurden .
Unter die Besucherinnen der Frühstücksrunde mischte sich auch Bürgermeisterkandidat Roman Waizenegger .
Lernen statt arbeitslos : Pilotprojekt für Ungelernte im Tourismus
An der Mecklenburgischen Seenplatte startetheute ein Pilotprojekt für die Tourismusbranche .
Unter Führung der Bundesarbeitsagentur sollen 49 Frauen und Männer , die bereits als Ungelernte in der Branche arbeiten , über drei Winter hinweg zu Fachkräften für Hotels und Gaststätten qualifiziert werden .
&quot; Neu daran ist , dass die sechsmonatigen Kurse mit Abschlüssen enden &quot; , sagte Carmen Wiechert von der Arbeitsagentur Neubrandenburg .
Der Nutzen sei vielfältig : Die Teilnehmer würden dadurch nicht arbeitslos , die Firmen bekämen geschulte Fachkräfte , die immer stärker in Hotels und Gaststätten fehlten , und die Agentur müsse nicht Arbeitslosigkeit finanzieren .
An dem Projekt sind auch die Industrie- und Handelskammer in Neubrandenburg sowie der Deutsche Hotel- und Gaststättenverband ( Dehoga ) Mecklenburg @-@ Vorpommern beteiligt .
NSA erklärt , ein „ interner Fehler “ und nicht Hacker seien Schuld am Crash der Website
Die schattenhafte National Security Agency erklärte am späten Freitag , ein Fehler habe ihre öffentliche Website einige Stunden lahmgelegt und nicht Hacker , wie online behauptet wurde .
„ NSA.gov war heute Nacht einige Stunden lang nicht erreichbar , da während eines geplanten Updates ein interner Fehler aufgetreten ist “ , erläuterte die Spionageagentur in einer per E @-@ Mail versandten Meldung .
Das Problem werde an diesem Abend behoben .
Die Behauptung , der Ausfall sei durch einen verteilt ausgeführten Denial of Service @-@ Angriff ( DDoS ) verursacht worden , sei nicht wahr .
In den frühen Abendstunden war Online @-@ Server @-@ Trackern aufgefallen , dass die NSA @-@ Website mindestens sechs Stunden lang nicht erreichbar war und dies für manche Nutzer auch weiterhin nicht ist .
Zuvor hatte ein Sprecher der NSA gegenüber ABC News erklärt , das sensible interne Netzwerk der Behörde sei „ in keiner Weise “ kompromittiert .
Geheime Informationen seien nicht in Gefahr , so der Sprecher .
Mindestens eine Gruppe von Hacktivisten nahm für sich in Anspruch , die NSA @-@ Website mit einem DDoS @-@ Angriff lahmgelegt zu haben .
Bei derartigen Angriffen wird die Zielwebsite mit Seitenaufrufen überflutet , bis die Server überlastet sind und die Website zusammenbricht .
Die Cybertaktik ist relativ simpel und die Angriffe dienen nicht dazu , in das interne Netzwerk des Zielsystems einzudringen .
Die früher supergeheime NSA , deren Spitzname einst No Such Agency ( Keine solche Behörde ) lautete , findet sich inzwischen im hellen Licht der Öffentlichkeit und sieht sich nach den in den letzten Monaten bekannt gewordenen Enthüllungen über ihr ausgedehntes Überwachungsprogramm im In- und Ausland scharfer Kritik ausgesetzt – ein Resultat der geheimen NSA @-@ Daten , die vom desillusionierten ehemaligen NSA @-@ Mitarbeiter Edward Snowden gestohlen und veröffentlicht wurden .
Die wachsende Kontroverse um den Geheimdienst befeuerte anfängliche Spekulationen darüber , der Zwischenfall heute sei das Ergebnis einer gezielten Cyperoperation .
Leicht gesunken ist die Zahl der Menschen ohne Job im Oktober um 22 auf 1.307 .
Zwar sei die Quote mit 3,1 Prozent besser als vergangenes Jahr und auch besser als im September , &quot; wir hätten uns aber mehr erhofft &quot; , sagt Monika Felder @-@ Bauer , stellvertretende Geschäftsstellenleiterin der Agentur für Arbeit in Sonthofen .
Denn zahlreiche Betriebe reagierten bislang verhalten bei Einstellungen .
Ein Grund hierfür ist laut Felder @-@ Bauer : &quot; Wir haben kaum Fachkräfte im Handwerk , im Gesundheitswesen und in der Altenpflege &quot; .
Jahreszeitenbedingt laufen seit September auch wieder Stellenangebote für Personal im Hotel- und Gaststättengewerbe ein .
Mitte Dezember beginnt dort die Wintersaison .
Den ganzen Hintergrundbericht dazu finden Sie im Allgäuer Anzeigeblatt vom 31.10.2013 ( Seite 33 ) .
Gewinneinbußen bei Bombardier nach Rückgang bei Lieferzahlen und Aufträgen
Der kanadische Flugzeug- und Eisenbahnhersteller Bombardier Inc meldete am Donnerstag einen 15 @-@ prozentigen Rückgang des Nettogewinns , nachdem er durch rückläufige Bestellungen und Auslieferungen bei Flugzeugen im dritten Quartal sowie Vertragsprobleme in der Eisenbahnsparte unter Druck geraten war .
Bombardier mit Sitz in Montreal veröffentlichte auch keine Flugtestdaten für sein brandneues Flugzeug der CSeries und erteilte keine neuen Auskünfte darüber , ob das Flugzeug gemäß des ehrgeizigen Zeitplans im nächsten September in die kommerzielle Nutzung gehen könne .
Auf den Jungfernflug des Testflugzeugs vor eineinhalb Monaten folgten bislang nur drei weitere Starts , was es fraglich erscheinen lässt , ob die Testphase wie geplant verläuft .
Die Ergebnisse blieben hinter den Prognosen zurück und führten zu einem Kurssturz von über acht Prozent an der Börse von Toronto .
Cameron Doerksen , Analyst bei National Bank Financial , senkte am Donnerstag seine Bewertung von „ outperform “ auf „ sector perform “ im Hinblick darauf , dass die Aktie in den nächsten ein bis zwei Quartalen ein begrenztes Kurspotenzial besitzt .
„ Zwar wurden schwächere Lieferzahlen bei Flugzeugen weitestgehend erwartet , doch von der Margenentwicklung im Transportbereich sind wir ganz klar enttäuscht “ , sagte Doerksen in einen Kundenschreiben .
Wir sind der Ansicht , dass Bombardier neue Bestellungen für die CSeries erhalten wird , wenn das Testprogramm für das Flugzeug voranschreitet .
Falls allerdings in den kommenden Monaten keine neuen Bestellungen bekannt gegeben werden , dann erwarten wir , dass der Markt dem Programm gegenüber skeptischer wird .
Bombardier hofft , dass die Flugzeugreihe der CSeries das Unternehmen in das untere Marktsegment katapultieren kann , das derzeit von Boeing und Airbus dominiert wird .
Das erste Testflugzeug wurde im März der Öffentlichkeit vorgestellt und flog nach monatelangen Verzögerungen erstmals im September .
Doch bisher sind verbindliche Bestellungen für die CSeries mit 177 moderat , da potenzielle Käufer auf die Ergebnisse der Flugtests warten und sehen möchten , ob die Behauptungen des Unternehmens hinsichtlich Treibstoffeffizienz und Kosteneinsparpotenzial des neuen Düsenverkehrsflugzeugs zutreffend sind .
Derzeit gibt es insgesamt 403 Bestellungen und Zusagen von 15 Kunden und Gesellschaften .
Vorstandsvorsitzender Pierre Beaudoin gibt sich zuversichtlich , dass Bombardier sein Ziel von 300 verbindlichen Bestellungen zu Beginn der kommerziellen Nutzung des Jets erreichen werde .
Die Unternehmensführung versicherte am Donnerstag gegenüber Analysten und Medien außerdem , das Programm liege im Terminplan .
„ Das Testflugzeug ist nicht länger am Boden geblieben als erwartet “ , sagte Beaudoin bei einer Telefonkonferenz und fügte hinzu , während der Standzeit des Flugzeugs seien Bodentests und Software @-@ Updates angesetzt gewesen .
Jeder Hersteller plant anders .
Wir haben beschlossen , einen ersten Flug zu unternehmen und dann einen Überarbeitungszeitraum anzuhängen , was wir auch getan haben .
Das geschieht während des gesamten Flugprogramms .
Das zweite von fünf Testflugzeugen werde voraussichtlich in den nächsten Wochen starten , die restlichen kurz danach , hieß es von Unternehmensseite .
Dennoch bleiben Analysten skeptisch , ob zwölf Monate nach dem Jungfernflug der erste Kunde ein Flugzeug der CSeries in Betrieb nehmen kann .
Bombardier erklärte , es überprüfe die Planung für die Inbetriebnahme ( EIS ) und werde diese in den nächsten Monaten aktualisieren .
„ Das langsame Voranschreiten der Flugtest – auch wenn sie offensichtlich Bombardiers interner Planung entsprechen – bestärkt unsere Ansicht , dass sich die Inbetriebnahme auf das erste Quartal 2015 verschiebt “ , sagte Doerksen .
Im dritten Quartal mit Ende am 30. September fiel Bombardiers Nettogewinn auf 147 Millionen Dollar bzw. 8 Cent pro Aktie von 172 Millionen Dollar bzw. 9 Cent pro Aktie im Jahr zuvor .
Der angepasste Gewinn pro Aktie beträgt unverändert 9 Cent .
Der Umsatz gab geringfügig nach und sank von 4,2 auf 4,1 Milliarden Dollar .
Analysten hatten einen Gewinn von 10 Cent pro Aktie und einen Umsatz von 4,56 Milliarden Dollar erwartet , so Thomson Reuters I / B / E / S .
Der weltweit viertgrößte Flugzeughersteller gibt an , er habe in diesem Quartal 45 Flugzeuge ausgeliefert , ein Rückgang von 57 im letzten Jahr .
Die Nettobestellungen fielen von 83 Flugzeugen auf 26 .
Der Auftragsbestand in der Luft- und Raumfahrtsparte betrug am 30. September 32,9 Milliarden Dollar und war damit gegenüber dem 31. Dezember unverändert .
„ Im Bereich Luft- und Raumfahrt lagen die Ergebnisse im Rahmen unserer Vorgaben , aber der niedrige Auftragseingang und die Marktverhältnisse insgesamt waren enttäuschend “ , sagte Beaudoin .
Der Umsatz in der Luft- und Raumfahrtsparte fiel um 13 Prozent auf zwei Milliarden Dollar .
Bombardier , der weltweit größte Eisenbahnhersteller , gab bekannt , dass der Umsatz in dieser Sparte um knapp elf Prozent auf 2,1 Milliarden Dollar gestiegen ist .
Der Auftragsbestand in der Transportsparte betrug am 30. September 32,6 Milliarden Dollar und war damit gegenüber dem 31. Dezember leicht erhöht .
Die Gewinnspanne im Bereich Transport wurde durch Abwicklungsprobleme bei einigen Großverträgen beeinträchtigt .
Laut Unternehmensführung wird es für das vierte Quartal neue Vorgaben geben .
Im nachmittäglichen Handel am Donnerstag gab die Bombardier @-@ Aktie um 8,5 Prozent nach und lag bei 4,83 kanadischen Dollar , nachdem auch angekündigt wurde , dass der Google @-@ Finanzvorstand Patrick Pichette in den Vorstand wechseln wird .
Die brasilianische Embraer SA , der weltweit drittgrößte kommerzielle Flugzeughersteller und Bombardiers engster Rivale , meldete am Donnerstag einen zehnprozentigen Rückgang des Quartalsgewinns .
USA : Schüsse am Flughafen von Los Angeles
Ein Unbekannter hat am Freitagvormittag ( Ortszeit ) am LAX @-@ Flughafen Schüsse abgefeuert .
Während die Flughafenleitung über den Kurznachrichtendienst Twitter mitteilte , der Schütze sei in Gewahrsam , berichtete die &quot; Los Angeles Times &quot; , der Mann sei tot .
Auch ein Sicherheitsmann sei getötet worden .
Medien berichteten außerdem von mehreren Verletzten .
US @-@ Präsident Barack Obama werde laufend über die Lage informiert , sagte der Sprecher des Weißen Hauses , Jay Carney .
Der Vorfall ereignete sich in Terminal 3. Augenzeugen gaben an , einen Schützen mit einem Gewehr in einer der Abflughallen gesehen zu haben , wie mehrere Medien berichteten .
Ein Reisender erzählte dem Sender CNN , viele Menschen hätten in Panik Schutz gesucht .
Reisende hätten geschrien und Kinder geweint .
Unter den Wartenden sei Panik ausgebrochen , viele hätten sich aus Angst hinter Stühlen versteckt .
Er habe zwei Schüsse gehört , sagt ein Reisender der &quot; Los Angeles Times &quot; .
Ein Mitarbeiter der Sicherheitsbehörde TSA habe eine Schussverletzung am Fuß erlitten .
Die Szene sei &quot; wie in einem Film &quot; gewesen .
Danach sei er selbst in einen Sicherheitsbereich gebracht worden , berichtete der Mann .
Die Schüsse sollen nahe eines Sicherheitskontrollbereichs gefallen sein .
Flughafen @-@ Gebäude evakuiert
Auf Fernsehbildern war zu sehen , wie zahlreiche Kranken- und Polizeiwagen vor einem Terminal vorfuhren .
Hunderte Menschen wurden aus dem Gebäude in Sicherheit gebracht .
Nutzer auf Twitter veröffentlichten Fotos von einem Spezialeinsatzkommando und einem auf dem Boden liegenden Gewehr .
Wie die Flughafenleitung über Twitter mitteilte , begann der Vorfall um 9.30 Uhr morgens ( Ortszeit ) .
Die Zufahrtsstraßen wurden gesperrt , wodurch sich laut CNN lange Rückstaus bildeten .
Bis auf Landungen sei der Flugverkehr vorübergehend eingestellt worden , hieß es .
Allerdings waren auf CNN auch mehrere Flieger beim Start zu beobachten .
Terminal 3 wird vor allem von kleineren US @-@ Fluggesellschaften bedient .
Der LAX @-@ Flughafen von Los Angeles ist einer größten Flughafen der USA .
Kokainabhängiger Anwalt , der Drogenboss vor polizeilicher Ermittlung warnte , muss ins Gefängnis
Basharat Ditta , 42 , gab Informationen an Unterweltgröße Neil Scarborough weiter
Der Anwalt hatte Angst , seine heimliche Drogenabhängigkeit könnte ans Licht kommen
Er wurde vom Liverpooler Crown Court zu drei Jahren Gefängnis verurteilt
Ein bekannter Strafverteidiger , der einen Drogenbaron vor einer großen polizeilichen Ermittlung warnte , weil er Angst hatte , seine geheime Drogensucht könnte aufgedeckt werden , wurde zu drei Jahren Haft verurteilt .
Basharat Ditta , 42 , versorgte Unterweltgröße Neil Scarborough mit sensiblen Informationen über Ermittlungen zu dessen Aktivitäten im Drogenhandel , nachdem er durch seine eigene Kokainsucht kompromittiert worden war .
Der von Kriminalisten als „ erstklassig “ gepriesene Anwalt mit dem Spitznamen „ Bash “ wurde 2011 in seinem Haus verhaftet , nachdem die Polizei Scarborough überwacht hatte , den er in einem früheren Drogenverfahren vertreten hatte .
Beamte beobachteten , wie Scarborough ( 32 ) drei Beutel Kokain am Haus des Anwalts in Blackburn , Lancashire , ablieferte , während dieser mit Kollegen bei einem Essen der Anwaltskammer war .
Die Ermittlungen brachten zutage , dass Ditta regelmäßig Drogen der Klasse A konsumierte , nachdem bei Tests Spuren von Kokain in seinen Haaren , auf seiner Brieftasche und an Kreditkarten gefunden worden waren .
Über einen Zeitraum von acht Monaten zwischen Januar und August 2011 versuchte er , unerlaubt Informationen über die Verhaftung zweier Männer im Auftrag von Scarborough und einem seiner Partner zu beschaffen .
Alle vier Verdächtigen wurden damals von der Polizei im Rahmen eines großen Ermittlungsverfahrens zum Heroin- und Kokainhandel in Lancashire , Cumbria , Merseyside , Berkshire und West Yorkshire überwacht .
Gemeinsam mit 32 anderen Personen wurden sie später verhaftet , nachdem die Polizei bei einer Reihe von Hausdurchsuchungen Heroin und Kokain im Wert von 1,5 Millionen Pfund sowie 200.000 Pfund an Bargeld sicherstellte .
Ditta , 42 , gab Informationen an die Kriminellen weiter , weil er fürchtete , seine Drogenabhängigkeit könne publik werden .
Heute wurde Ditta , der für die Kanzlei Forbes Solicitors in Blackburn arbeitet , am Liverpooler Crown Court nach einem dreiwöchigen Verfahren in zwei Anklagepunkten wegen Behinderung der Justiz für schuldig befunden und verurteilt .
Er gab bei einer früheren Befragung den Kokainbesitz zu .
Der Anwalt wurde überführt , nachdem die Polizei bei ihren Ermittlungen gegen Scarborough herausfand , dass dieser im Februar 2011 in regelmäßigem telefonischen Kontakt mit Ditta gestanden hatte .
Zwei Ermittlungsbeamte folgten dem Verdächtigen und sahen , wie er zu Dittas Haus ging und dort die Drogen mit einer Reinheit von 60 Prozent in einem schwarzen Golfhandschuh unter die Mülltonne des Anwalts legte .
Kurz nachdem er die Drogen abgeliefert hatte , telefonierte Scarborough regelmäßig mit Ditta , der sich beim Abendessen im Fußballstadion der Blackburn Rovers in Ewood Park befand .
Der Anwalt kehrte nach Hause zurück , holte sich die Drogen und dann wurden neun Mitteilungen zwischen den beiden ausgetauscht .
Vor Gericht wurde bekannt , dass Ditta ein „ regelmäßiger Konsument “ von Kokain war , nachdem bei Tests Drogen der Klasse A in seinen Haaren , seiner Brieftasche und auf seinen Kreditkarten entdeckt worden waren .
Ditta wurde später verhaftet , stritt aber ab , Kokain zu nehmen und sagte , er habe mit dem mutmaßlichen Dealer gesprochen , weil dieser sein Mandant sei , und behauptete , ihre Diskussion unterliege dem „ Anwaltsgeheimnis “ .
Während seiner Verhaftung nahm Ditta seine Brieftasche und versuchte , eine Reihe von Kreditkarten zu entfernen , doch sie wurden sichergestellt und ihm wurde eine Haarprobe entnommen .
Beim polizeilichen Verhör gab er an , er betreibe sowohl unter seiner Privatadresse als auch am Arbeitsplatz ein Büro und Mandanten würden ihn zu Hause wegen juristischer Angelegenheiten anrufen .
Vor Gericht wurde bekannt , dass er wichtige Akteure des Drogenhandels , von denen er einige zuvor vertreten hatte , nach bedeutsamen Verhaftungen angerufen und darüber informiert hatte , was die Ermittler über sie wussten .
Staatsanwältin Anne Whyte sagte : „ Ein Strafrechtsanwalt sollte besser als alle anderen wissen , dass man das Gesetz nicht bricht . “
Ditta wird des Missbrauchs seiner Position als Strafverteidiger angeklagt , da er sich zu sehr mit bestimmten Mandanten eingelassen hat .
Die fragliche Beziehung ist nicht einfach die eines Drogenhändlers , sondern eines Drogenhändlers , der seinen Anwalt mit Drogen versorgt .
Ein Teil seiner Mitteilungen war zweifellos legitim , denn er war der Anwalt dieser Personen .
Doch das ging weit über die Grenzen einer normalen Beziehung zwischen Anwalt und Mandant hinaus .
Er wirkte den polizeilichen Ermittlungen soweit wie möglich entgegen , sodass sie weiterhin ihren kriminellen Aktivitäten nachgehen konnten .
Herr Ditta brachte damit seinen Berufsstand in Verruf .
Er stand bestimmten Mandanten zu nahe , insbesondere Scarborough , und er ließ es zu , dass seine Unabhängigkeit kompromittiert wurde .
Ditta wies jedes Fehlverhalten von sich und behauptete : „ Wenn ich ein korrupter Anwalt wäre , was ich nicht bin , und Informationen an Scarborough weitergeben wollte , dann würde ich keine 15 Stunden warten , sondern das sofort tun . “
Doch nach der Anhörung sagte Superintendent Lee Halstead von der Polizei in Lancashire : „ Herr Ditta hat den Schritt von einem Strafverteidiger zu einem Kriminellen in dem Moment getan , als er anfing , Drogen von organisierten Kriminellen zu erwerben . “
Seine Kokainabhängigkeit führte zu einer hoffnungslosen Kompromittierung und machte ihn empfänglich für die Motive führender Mitglieder der organisierten Kriminalität , die ihn beauftragten , wertvolle Informationen über polizeiliche Ermittlungen einzuholen .
Anwälte müssen die höchsten Standards an Integrität aufrechterhalten und in der Öffentlichkeit für Vertrauen und Zuversicht sorgen .
Ditta hat dieses Vertrauen hintergangen und versucht , sich hinter der Fassade seines Berufs zu verschanzen .
Die Serious and Organised Crime Unit von Lancashire leitete die Ermittlungen gegen Ditta , die auch zu einer Verurteilung in drei Fällen wegen des Besitzes von Kokain und Justizbehinderung führten , was unsere Entschlossenheit unterstreicht , Kriminelle vor Gericht zu bringen .
Dieser Fall sollte Kriminellen eine Warnung sein und zeigt , dass sich keiner dem Arm des Gesetzes entziehen kann .
Wir finden Sie und bringen Sie vor Gericht .
Scarborough selbst wurde zu 14 Jahren Gefängnis verurteilt , nachdem er sich der Verschwörung zum Heroin- , Kokain- und Cannabishandel für schuldig erklärt hatte .
Fünfunddreißig weitere am Drogenhandel beteiligte ´ Personen wurden zu Gesamtstrafen von 153 Jahren wegen Drogendelikten verurteilt .
Auf seiner Website veröffentlichte Ditta einen Bereich mit Fragen und Antworten über sich , in dem er angab , sein Traumjob sei es , als Anwalt Mandanten in der Todeszelle in Amerika zu vertreten , sein ultimativer Gast beim Abendessen sei Mohammed Ali und Chancenungleichheit sei die Motivation für seine Arbeit .
Revolutionäres Werk der Kirchenmusik
Zum Abschluss der Feierlichkeiten aus Anlass seines 160 @-@ jährigen Bestehens wird der Liederkranz Dunningen zwei Gottesdienste mit der &quot; Deutschen Messe &quot; von Franz Schubert umrahmen .
Nach dem großen Erfolg des Musicals &quot; Rock my Life &quot; , das die Zuschauer im Frühjahr diesen Jahres begeisterte , wird der Liederkranz zum Abschluss des Jubiläumsjahres zwei Gottesdienste mit der Aufführung der Deutschen Messe von Franz Schubert bereichern .
Am Samstag , 26. Oktober , wird diese außergewöhnliche Messe ab 19 während der Abendmesse in der St. Martinuskirche Dunningen und am Sonntag , 27. Oktober , ab 10.15 Uhr beim Gottesdienst in der St. Johannes Baptistkirche in Lackendorf zu hören sein .
Die so genannte Deutsche Messe mit dem Originaltitel &quot; Gesänge zur Feier des heiliges Opfers der Messe &quot; , D 872 , ist ein geistliches Musikwerk des Komponisten Franz Schubert aus dem Jahre 1826 und galt zur Zeit der Entstehung fast als revolutionär .
Die Messe wird im Rahmen der Gottesdienste aufgeführt , wie der Auftraggeber Johann Philipp Neumann es im Sinn hatte .
Unter der Leitung von Hermann Schneider wird der Chor von der Bläsergruppe des Musikvereins Frohsinn Tennenbronn und Noemi Lokodi an der Orgel begleitet .
Haslach : Skepsis weicht zusehends Zuversicht
Mit den Wahlen zum Pfarrgemeinderat 2015 wird sich beispielsweise in der Seelsorgeeinheit Haslach ( SE ) Grundlegendes ändern .
Es gibt dann nur noch einen gemeinsamen Pfarrgemeinderat für alle sechs Pfarreien .
In einer gemeinsamen Sitzung bereiteten sich am Samstag die Gremien aus Haslach , Hofstetten , Mühlenbach , Fischerbach , Steinach und Welschensteinach auf die Veränderungen vor .
Denn an den grundsätzlichen Beschlüssen der Diözese ist nichts mehr zu ändern und es ist an den Pfarrgemeinderäten , diese möglichst zufriedenstellend umzusetzen .
Im Laufe des Tages wurde besonders deutlich : die Skepsis gegenüber dem Neuen weicht zögernd aber zusehends einer Zuversicht .
Von den Vorstellungen und Erwartungen an die Neuerungen 2015 bis hin zu konkreten Vorschlägen über die künftige Zusammensetzung und die Größe des Pfarrgemeinderats reichten die äußerst konstruktiven Gespräche der sechs Gremien mit den Hauptamtlichen des Seelsorgeteams .
Regionaldekan Georg Schmitt erläuterte anhand einer Präsentation die neu gefassten Richtlinien für Seelsorgeeinheiten in der Erzdiözese Freiburg .
Danach bildet die SE Haslach als Kirchengemeinde künftig eine Körperschaft des öffentlichen Rechts , die in die Rechte und Pflichten der bisher sechs einzelnen Kirchengemeinden eintritt .
Es wird nur noch einen gemeinsamen Pfarrgemeinderat und einen Stiftungsrat geben , in dem der Pfarrer Kraft Amtes vertreten ist .
Aus jeder Pfarrei sollen mindestens zwei gewählte Mitglieder vertreten sein , in den sechs Pfarreien werden vor Ort so genannte Gemeindeteams gebildet .
Ihre Aufgabe wird es künftig sein , das kirchliche Leben im Ort zu fördern .
Bei der Frage nach den Finanzen der einzelnen Pfarrgemeinde zeigte sich dann erheblicher Gesprächsbedarf .
Die Neuerungen sehen vor , dass angesammelte Guthaben in den Pfarreien zweckgebunden erhalten bleiben .
Die Verbindlichkeiten gehen dagegen auf die Gesamtgemeinde über .
Gerade im Hinblick auf die großen geplanten Investitionen , deren Verpflichtung dann alle Pfarreien treffen , gab es große Bedenken .
&quot; Auch in der Vergangenheit wurde nur in Projekte investiert , die von den einzelnen Pfarreien alleine bewältigt werden konnten &quot; , relativierte Haslachs Pfarrgemeinderatsvorsitzender Bruno Prinzbach .
Praktische Erfahrung mit einem gemeinsamen Gremium für fünf Pfarreien schilderte Barbar Ritter , die Vorsitzende des Gremiums in der Seelsorgeeinheit Schutterwald @-@ Neuried .
Sie hatten sich 2006 zur Aufgabe gemacht , &quot; Eins werden , fünf bleiben &quot; und mussten feststellen , dass das gar nicht so einfach ist .
Die Gremien der Haslacher Seelsorgeeinheit machten sich dann daran , die Fragen zur künftigen Zusammensetzung und Größe des gemeinsamen Pfarrgemeinderats sowie der praktischen Arbeit der Gemeindeteams zu beantworten .
Die Ausarbeitungen werden in weiteren Sitzungen konkretisiert und in einer weiteren gemeinsamen Sitzung aller sechs Gremien im kommenden Frühjahr beschlossen .
Am Ende präsentierte Pfarrgemeinderat Michael Schöner aus Steinach das neue Logo der Seelsorgeeinheit , dem mit deutlicher Mehrheit zugestimmt wurde .
In Pfullendorf wird der Strom teurer
Die Bürger Pfullendorfs müssen sich auf höhere Stromkosten einstellen .
Wie der Geschäftsführer der Stadtwerke , Jörg @-@ Arne Bias , gegenüber dem SÜDKURIER bestätigte , kommen auf eine vierköpfige Pfullendorfer Familie 70 bis 90 Euro Mehrkosten pro Jahr zu .
Wesentlicher Grund der anstehenden Preiserhöhung ist der Anstieg der sogenannten EEG @-@ Umlage von 5,277 auf 6,3 Cent pro Kilowattstunde .
Diese Umlage wird jedes Jahr im Oktober von den vier Betreibern der der großen Stromtrassen neu festgesetzt .
Diese beziffern die ihnen aus der Energiewende entstehenden Mehrkosten , die sie durch eine Umlage über den Strompreis erheben können .
Die Stadtwerke Pfullendorf bilden das letzte Glied in dieser Kette .
Der Aufsichtsrat des Energieunternehmens war in seinen Prognosen sogar von einer höheren Umlage ausgegangen , wie Jörg @-@ Arne Bias berichtet .
Nun müssten die konkreten zahlen errechnet werden , bevor die Stadtwerke nächste Woche ihre Kunden über die exakte Preiserhöhung informieren könnten .
&quot; Wir gehen von einer Anhebung von 1 Cent plus x aus &quot; , so Bias , wobei die Zahl eher in der Nähe der 2 Cent liegen werde .
Ampel auf Dauerrot : Auf Wartezeit achten
Manchmal wird eine Ampel einfach nicht grün .
Die Kontaktschleife in der Straße reagiert nicht , oder das Lichtzeichen ist defekt .
Was soll man dann tun - bei Rot fahren ?
Hat ein Betroffener lange genug an einer roten Ampel gewartet und die Kreuzung ist frei , kann er weiterfahren , erklärt der Stuttgarter Rechtsanwalt Ralf Becker in der Zeitschrift &quot; Motorrad &quot; .
Die Wartezeit müsse aber &quot; angemessen &quot; sein , was von Fall zu Fall unterschiedlich ausgelegt werden könne .
Becker rät , mindestens fünf Minuten auszuharren , bevor von einer Funktionsstörung der Ampel auszugehen ist .
Wer die Fahrt trotz Rotlichts fortsetzt , müsse sich jedoch im Klaren darüber sein , dass er für einen dadurch verursachten Unfall die volle Schuld trägt .
Wer sich weniger als fünf Minuten geduldet , wartet unter Umständen nicht lange genug , warnt Becker und verweist auf einen Beschluss des Oberlandesgerichts Hamm .
In dem verhandelten Fall hatte ein Fahrer nach etwa drei Minuten Dauerrot die Ampel ignoriert und musste sich für einen fahrlässigen Rotlichtverstoß verantworten .
Die Ampel war nämlich nicht defekt , sondern sprang wenig später auf Grün um .
Ein Fahrverbot blieb ihm wegen der besonderen Situation erspart - die Geldstrafe aber nicht .
Gemeinderat freut sich über soliden Haushalt
Immer wenn es in Gemeinderatssitzungen um den Haushalt geht , hat Bürgermeister Ralph Gerster gut lachen .
Das Gemeindesäckl in Herdwangen @-@ Schönach ist gut gefüllt und Schulden kennt die Verwaltung bereits seit 2005 nicht mehr .
Auch das Haushaltsjahr 2012 kann in diesem Sinne als voller Erfolg verbucht werden .
Dies wurde bei der Vorstellung der Jahresrechnung für 2012 deutlich .
Wie Andrea Rothmund erläuterte , sei der Verwaltungshaushalt mit rund 7,6 Millionen Euro über eine Millionen Euro höher ausgefallen als geplant .
Auch der Überschuss des Verwaltungshaushaltes liege mit etwa 1,8 Millionen Euro rund eine Millionen Euro über dem Ansatz .
Zu verdanken sei der Überschuss vor allem höheren Gewerbesteuereinnahmen und dem Gemeindeanteil an der Einkommenssteuer .
Auch der Vermögenshaushalt lag wieder deutlich über den geplanten Werten .
Statt der vorgesehenen 1,5 Millionen Euro betrug er im vergangenen Jahr 2,5 Millionen Euro .
&quot; Dies liegt im Wesentlichen an der höheren Zuführung aus dem Verwaltungshaushalt &quot; , so Rothmund .
Da im Haushaltsjahr 2012 weniger Investitionen als geplant getätigt worden sind , ist auch die Rücklagenzuführung höher ausgefallen .
Insgesamt konnte die allgemeine Rücklage um rund 2,1 Millionen Euro auf jetzt insgesamt 4,9 Millionen Euro gesteigert werden .
Bürgermeister Ralph Gerster bedankte sich bei Rothmund und ihrem Team für die gute Arbeit .
&quot; So ein Werk schüttelt man nicht einfach aus dem Ärmel &quot; , lobte Gerster mit Blick auf die Jahresrechnung .
Er und die Gemeinderäte freuten sich sichtlich über die guten Zahlen .
Es mag paradox klingen , doch genau diese guten Zahlen könnten die Bürger bald teuer zu stehen kommen .
Durch die gute Finanzlage konnte die Gemeinde in der Vergangenheit auf hohe Hebesätze verzichten .
Dadurch wiederum seien aber laut Gerster schon öfters Zuschüsse vom Land gekürzt worden .
Für diese Zuschüsse aus diversen Ausgleichsstöcken gibt es Voraussetzungen .
Unter anderem müssen die Städte und Gemeinden , die Zuschüsse beantragen , bestimmte Hebesätze vorweisen .
&quot; Das Thema Hebesätze müssen wir uns anschauen , da in den kommenden Jahren Investitionen anstehen , für die wir gerne Zuschüsse hätten &quot; , kündigte Gerster in diesem Zusammenhang an .
Nagold : Hugo Wermter seit 60 Jahren im Chor
Mit 60 Jahren als Sänger ist Hubert Wermters Geschichte beim Männergesangverein Cäcilia fast doppelt so lange wie die des Herbsfestes , in dessen Rahmen er feierlich geehrt wurde .
Hubert Wermter stand wie gewohnt in den Farben seines Männergesangvereines auf der Bühne .
Auch nach 60 Jahren macht ihm das Singen mit dem inzwischen wohl mehr als lieb gewonnenen Chor immer noch großen Spaß .
Im Verein war Wermter ebenfalls aktiv , unter anderem 28 Jahre lang als Mitglied des Ausschusses .
Für sein Engagement und seine Vereinstreue erhielt er gleich mehrere Auszeichnungen : Jörg Kohr , Pastoralreferent im Auftrag des Cäcilienverbandes Rottenburg @-@ Stuttgart , überreichte ihm - da der Chor auch ein Kirchenchor ist - eine Urkunde des Verbandes und einen von Bischof Gebhard Fürst unterzeichneten Ehrenbrief .
Seine Sängerkollegen überreichten ihm die Urkunde des deutschen Chorverbandes sowie einen gravierten Zinnteller .
Neben der Ehrung verlief das 31. Herbstfest in gewohnten Bahnen : Mit dem MGV Betra , dem Liederkranz Salzstetten , der Sängerabteilung Baisingen und dem örtlichen Musikverein hatten die Vollmaringer eine bunte Mischung verschiedener Chöre und Gesangsstile geladen , welche die rund 400 Besucher unterhielten .
Der MGV Vollmaringen eröffnete mit stimmungsvollen Liedern wie &quot; Im Weinparadies &quot; und &quot; Lustig , ihr Brüder &quot; .
Ihrem Ehrensänger Hubert Wermter bereiteten sie zur Ehrung noch ein kleines Ständchen - Wolfgang Amadeus Mozarts &quot; Bundeslied &quot; .
Der Männergesangverein Betra sang ebenfalls klassische Chorlieder wie &quot; Jägerwerben &quot; von Julius Wengert , &quot; Weit , weit weg &quot; von Hubert Goisern sowie das Volkslied &quot; Wann du durchgehst durchs Tal &quot; .
Der Liederkranz Salzstetten sorgte mit seinem gemischten Chor und seiner Frauengruppe - dem &quot; Impulschor &quot; - für die Frauenquote des Festes .
Der gemischte Chor entführte mit der neapolitanischen Volksweise &quot; Santa Lucia &quot; und &quot; Eviva Espana &quot; von Antos Gus in fremde Länder , während der &quot; Impulschor &quot; ebenfalls auf fremde Sprachen zurück griff : &quot; Liberatio &quot; und &quot; Hey Jude &quot; gehörten zu ihrem Programm .
Die Sängerabteilung des Baisinger Sportvereins kam mit &quot; Was isch der Schwob ? &quot; von Hans Süssmuth und Robert Papperts &quot; Bierlied &quot; wieder zurück in heimische Gefilde , wo der Vollmaringer Musikverein den krönenden musikalischen Abschluss bot .
Für die Kinder gab es ein kleines Nebenprogramm - &quot; Oma Hanne &quot; alias Hannelore Stollsteimer führte ein Kasperltheater auf und las ein paar Geschichten vor , welche die Kinder den Mittag über gut beschäftigten .
Kinderträume werden wahr
Die Kindergärten und Kindertagesstätten im Zollernalbkreis bekommen in diesen Tagen Post .
Der Schwarzwälder Bote möchte in Zusammenarbeit mit Bauhaus und der Sparkasse Zollernalb die Einrichtungen bei der Realisierung ihrer Bau- und Verschönerungswünsche unterstützen .
Braucht der Kindergarten einen neuen Sandkasten ?
Mitmachen bei der Aktion können alle Kindergärten , Kindertagesstätten und Kinderkrippen aus dem gesamten Zollernalbkreis .
Wenn Sie einen Bau- oder Verschönerungswunsch für Ihre Einrichtung haben , können Sie sich mit diesem beim Schwarzwälder Boten bewerben .
Seien Sie mit Ihren Kindern kreativ und überraschen Sie die Jury der Aktion Kindergarten @-@ Baustelle .
Eine Jury , bestehend aus Vertretern von Schwarzwälder Bote , Bauhaus und Sparkasse Zollernalb , wählt aus allen Einsendungen drei Wünsche aus .
Welche Voraussetzungen zur Teilnahme gibt es ?
Der Wunsch sollte mit Baumaterial im Wert von maximal 2000 Euro und an einem ( Aktions- ) Tag zu realisieren sein .
Darüber hinaus muss der Gewinner selbst für viele fleißige Bauhelfer sorgen .
Was hat es mit dem Aktionstag und den Helfern auf sich ?
Bauhaus stellt mit Unterstützung der Sparkasse Zollernalb das Material zur Verfügung .
Es wird am vereinbarten Tag in den Kindergarten geliefert und soll dann direkt von den Helfern verarbeitet werden .
Helfer können Eltern , Großeltern , Freunde , Vereine und natürlich die Erzieher und Kinder selbst sein .
Kenianische Presse empört über kontroverses Mediengesetz
„ Wir befinden uns in einer beängstigenden Lage und man darf sich fragen : Was hält das Parlament davon ab , morgen einfach die richterliche Unabhängigkeit abzuschaffen ? “ , war in der Zeitung zu lesen , die den Gesetzesentwurf für nicht verfassungsgemäß hält .
„ Das Gesetz ist drakonisch und sehr strafend und wir lehnen es ab “ , sagte Cyrus Kamau , Geschäftsführer der Capital Group , zu der auch CapitalFM gehört , eine der angesehensten unabhängigen Radiostationen und Nachrichten @-@ Websites Kenias .
Er sagte , das neue Medientribunal „ wird immer voreingenommen sein , denn es ist ein verlängerter Arm der Regierung “ , und Einschränkungen bei Inhalten und Werbung würden Kenias Stellung in der globalen Wirtschaft beschädigen .
„ Ich hoffe , der Präsident hört auf uns und wir appellieren an ihn , diesen Gesetzesentwurf abzulehnen und an das Parlament zurückzuschicken “ , sagte er .
Laut der Zeitung The Star nehme die Regierung durch das neue Gesetz „ die Medien effektiv in einen Würgegriff “ . Dagegen schreibt The Standard , Demokratie und Redefreiheit in Kenia hätten „ einen schweren Schlag “ erlitten , und betitelte den Entwurf als „ drakonisch “ .
Die Verabschiedung des Gesetzes gehört zu einer Reihe von Maßnahmen , mit denen die nationale Sicherheit im Nachgang zu den Angriffen durch bewaffnete Islamisten auf das Westgate @-@ Einkaufszentrum im September gestärkt werden soll .
Die kenianischen Medien zogen den Zorn der Behörden auf sich , weil sie Aufnahmen von Sicherheitskameras veröffentlichten , auf denen zu sehen war , wie die an den Tatort entsandten Einheiten angeblich das luxuriöse Einkaufszentrum ausraubten .
Polizeichef David Kimaiyo reagierte darauf mit der Einbestellung zweier Journalisten und eines führenden Medienvertreters zu Verhören , auch wenn die Vorladung nach einem Aufschrei der Medien zurückgezogen wurde .
Nach dem neuen Gesetz können Medienhäuser mit einer Strafe von bis zu 20 Millionen kenianischen Schillingen belegt werden und einzelne Journalisten mit bis zu einer Million sowie dem weiteren Risiko , ihre berufliche Anerkennung zu verlieren oder von einer offiziellen Presseakkreditierung ausgeschlossen zu werden .
Das Tribunal hat außerdem das Recht , den Besitz der Betroffenen zu beschlagnahmen , wenn eine Strafe nicht bezahlt wird .
Laut Daily Nation kann „ schon eine einzige Strafe die meisten Radiosender in den Bankrott drängen “ .
Darüber hinaus ist die Zeitung der Ansicht , diese Maßnahmen könnten eine vernichtende Auswirkung auf die ihrer Beschreibung nach „ lebhafte Blogosphäre “ Kenias haben .
Wenn sie die Medien zum Schweigen brächten , könnten Politiker ungestraft tun , was immer sie wollen .
„ Keiner wird es jemals erfahren “ , schrieb Mutuma Mathiu , Journalist bei der Nation , der die kenianischen Medien als einen entscheidenden Kontrollfaktor im öffentlichen Leben bezeichnet .
„ Überlässt man Politiker sich selbst , führen sie das Land in den Bankrott und uns zurück in die Zeit der Jäger und Sammler “ , kommentierte er .
Die kenianischen Gesetzgeber zogen schon in der Vergangenheit den öffentlichen Ärger auf sich .
Im Mai stimmten sie ab , die von der nationalen Vergütungskommission angeordneten Kürzungen rückgängig zu machen und setzten ihre deftigen Gehälter von etwa 532.000 Schilling steuerfrei pro Monat wieder in Kraft – sie zählen zu den weltweit höchsten .
Bad @-@ Dürrheim : Ein Traum wird wahr für den FC
An der Bedeutung für die Stadt und den Fußballclub büßte die offizielle Einweihungsfeier für den Kunstrasensportplatz trotz der kalten Witterung und dem Regen nichts ein .
Eine angenehmere Feierstunde hatten sich am vergangenen Samstag wohl alle gewünscht , doch Petrus wollte dabei nicht mitspielen .
So hatten all jene das Nachsehen , die ohne Regenschirm kamen oder solch einen aus irgend einem Grund nicht halten konnten .
Das ging den Musikern , die den Festakt umrahmten , genauso wie so manchem Redner .
Nass wurde deshalb auch der FC @-@ Vorsitzende Albrecht Schlenker , der von der Erfüllung eines Traums sprach .
Sein Dank galt allen voran Bürgermeister Walter Klumpp , der sich für die Umsetzung des Projektes stark engagiert habe , dem Gemeinderat , den beteiligten Unternehmen und Vereinsmitgliedern , die sich einbrachten .
Hier ganz besonders Lothar Held , Paul Weizenegger , Heiner Gail und Peter Graf .
Die rüstigen Rentner verlegten 400 Quadratmeter Pflastersteine für die neuen Wege .
Dieses bemerkenswerte ehrenamtliche Engagement würdigte auch der Landtagsabgeordnete Karl Rombach .
Weitere Grußworte sprachen für den städtischen Sportausschuss Hubert Baier , der Bezirksvorsitzende des südbadischen Fußballverbandes , Kuno Kayan , und Friedrich Knorr vom Planungsbüro , der eine Spende für die Jugendabteilung des Clubs ankündigte .
Bürgermeister Klumpp brachte in Erinnerung , dass immer wiederkehrende witterungsbedingte Einflüsse im Frühjahr und Herbst dem ursprünglichen Rasenplatz so zusetzten , dass er nicht bespielt werden konnte .
Bereits vor 15 Jahren gab es die ersten Überlegungen zur Lösung des Problems , als an den Bau eines dritten Platzes beim Gelände des Fußballclubs oder bei der Realschule am Salinensee gedacht wurde .
Beides wurde wieder verworfen .
Vor sechs Jahren kamen Gedanken zur Anlegung eines Kunstrasensportplatzes auf , was allgemein als die ultimative Lösung angesehen wurde .
Konkrete Planungen wurden vor zwei Jahren aufgenommen , als der FC die Schabelstube in Erbpacht übernahm , eine Kostenbeteiligung von 100 000 Euro für den Bau des Platzes zusagte und das Land Fördermittel von 104 000 Euro billigte .
Der Gemeinderat beschloss im Oktober 2012 die Übernahme der restlichen 356 000 Euro an den Gesamtkosten von 560 000 Euro , fasste Klumpp zusammen .
Der Baubeginn des 68 mal 108 Meter großen Kunstrasenplatzes erfolgte am 4. Juni .
Während der über drei Monate andauernden Bauphase wurden 3000 Kubikmeter Erde abgetragen , wovon die Hälfte für die Anlegung einer Dirt @-@ Bike @-@ Strecke verwendet wurde .
Union und SPD haben ihre Koalitionsverhandlungen mit den Themen Inneres und Justiz fortgesetzt .
Dazu kam die zuständige Arbeitsgruppe am Morgen in Berlin zusammen .
Unter anderem geht es um direkte Demokratie , Abgeordnetenbestechung und die Bundespolizei .
Am Vormittag wollte auch die Arbeitsgruppe Migration und Integration ihre Beratungen fortsetzen .
Dabei dürfte es unter anderem um das Thema doppelte Staatsbürgerschaft gehen , bei dem beide Seiten gegensätzliche Vorstellungen haben .
Die SPD möchte den Zwang für in Deutschland geborene Zuwandererkinder , sich für eine zu entscheiden , beenden - die Union lehnt einen Doppelpass ab .
Beim Thema Verkehr , das an diesem Freitag nicht auf der Tagungsordnung steht , untermauerte die SPD ihr Nein zu einer von der CSU geforderten Pkw @-@ Maut .
Eine Vignette sei eine &quot; Flatrate fürs Vielfahren und damit ökologisch kontraproduktiv &quot; , erklärte der SPD @-@ Verhandlungsführer für das Thema Verkehr , Florian Pronold , in einem Schreiben an seine Fraktion .
Es drohten Ausweichverkehre auf Landstraßen , die schon jetzt Unfallschwerpunkte seien .
Die Einführung einer Maut für alle Pkw wäre aus Sicht Pronolds zudem nur ein erster Schritt .
&quot; Es besteht die Gefahr , dass zu einem späteren Zeitpunkt die Kompensation für Deutsche gestrichen wird &quot; , sagte er .
Dieter Thomas Kuhn in Stuttgart : Die singende Föhnwelle auf der Freilichtbühne
Stuttgart - &quot; Wann wird &apos; s mal wieder richtig Sommer ? &quot; war eigentlich nicht die Frage am Freitagabend auf der Freilichtbühne Killesberg .
Es war wahrlich eine tropische Nacht in Stuttgart .
Die besten Voraussetzungen also für Schlagerstar Dieter Thomas Kuhn und seine Band .
Klicken Sie sich durch die Bildergalerie zum Aufrtitt der &quot; singenden Föhnwelle &quot; .
Autofahrer bei Unfall schwer verletzt
Bei einem Unfall am Donnerstagabend ist ein 37 @-@ jähriger Pkw @-@ Fahrer aus Aachen schwer verletzt worden .
Nach Angaben der Polizei war eine 41 @-@ Jährige aus Müsch gegen 21.15 Uhr mit ihrem Wagen auf dem Kempener Außenring in Richtung Grefrath unterwegs .
Als die nach links auf die St. Töniser Straße abbiegen wollte , übersah sie den entgegenkommenden Wagen des 37 @-@ Jährigen .
Die Fahrzauge kollidierten .
Der Aachener erlitt schwere Verletzungen und musste zur Behandlung ins Krankenhaus gebracht werden .
Konstanz : Sperrung nach Unfall am Schänzlekreisel
Zu dem Unfall war es laut Polizei gekommen , als ein 51 Jahre alter Fahrer eines Schweizer Seat Ibizas am Donnerstagabend , gegen 20 Uhr , auf der linken Fahrspur der zweispurigen Reichenaustraße stadtauswärts fuhr .
Kurz vor dem Kreisverkehr am Schänzle bemerkte er , dass er sich auf der Linksabbiegespur in Richtung Stromeyersdorfstraße befand und wechselte auf die rechte Fahrspur .
Hierbei kam es zum Zusammenstoß mit dem dort fahrenden BMW eines 23 @-@ jährigen Konstanzers .
Ebenfalls beschädigt wurde der hinter dem BMW fahrende VW Passat eines 19 @-@ Jährigen .
Insgesamt entstand rund 15000 Sachschaden , teilte die Polizei mit .
Die Fahrbahn musste während der Unfallaufnahme gesperrt werden , hieß es weiter .
Flughafen Wien schafft Passagier @-@ Aufrufe ab
Herr Max Maier , bitte kommen Sie zu Gate 24 .
Durchsagen wie diese wird es künftig am Flughafen Wien @-@ Schwechat nicht mehr geben .
Ein Großteil der Lautsprecherdurchsagen fällt damit weg - der Lärmpegel soll so deutlich gesenkt werden .
Eine entspanntere Atmosphäre zu schaffen , ist das Ziel dieser Neuerung .
Wie Airport @-@ Sprecher Peter Kleemann gegenüber Radio Wien bekannt gab , folgt der Flughafen Wien mit der Einstellung von Durchsagen , die einzelne Personen betreffen , einem internationalen Trend .
So verzichten bereits unter anderem die Flughäfen in Kopenhagen , Frankfurt oder Dubai auf die lärmenden Aufrufe .
Durch den Wegfall dieser Durchsagen - im Durchschnitt ertönen an einem Tag rund 200 persönliche Aufrufe durch die Lautsprecher - soll es künftig ruhiger am Flughafen zugehen .
&quot; Es hat sich auch in der Erfahrung gezeigt , dass diese individuellen Durchsagen relativ wenig wahrgenommen wurden , gleichzeitig aber auch alle anderen Informationen zu geänderten Flugsteigen oder Abflugzeiten hier ein bisschen untergehen &quot; , so Kleemann im Gespräch mit dem Radiosender .
Highlander @-@ Games auf dem Kaltenhof
Neben dem Bremswagenziehen mit Traktoren gibt es beim landwirtschaftlichen Herbstfest auf dem Kaltenhof vom 6. bis 8. September noch einen zweiten Wettkampf .
Am Samstag , 7. September , starten um 13.30 Uhr die Highlander @-@ Games .
Die haben zwar eine schottische Tradition , sind aber auf dem Kaltenhof schwäbisch angehaucht .
Teams und Einzelkämpfer messen sich dabei in den Disziplinen Baumstammwerfen , Hufeisenwerfen und Wassereimertragen .
Viereinhalb Meter ist der Baumstamm lang und 25 bis 30 Kilogramm schwer .
&quot; Es kommt nicht auf die Weite an &quot; , erklärt Organisator Peter Saile .
Der Stamm muss senkrecht abgeworfen werden , soll sich einmal überschlagen und dann gerade zum Liegen kommen .
Das wird mit den meisten Punkten bewertet .
Beim Hufeisenwerfen kommt es auf die Zielgenauigkeit an .
Aus acht Metern Entfernung wird auf einen Pflock geworfen .
Geschicklichkeit und Kraft müssen die Teilnehmer beim Wassereimertragen über 50 Meter unter Beweis stellen .
Zeit und Wassermenge in einem Bottich werden am Ende gemessen .
Aus jedem &quot; Clan &quot; beziehungsweise Team dürfen dann zwei am Einzelwettbewerb teilnehmen .
Die Gewinner des Team- und Einzelwettkampfs erhalten Preise .
Trainiert werden kann schon ab 10 Uhr .
Erwünscht ist eine passende Kleidung , beispielsweise können die Wettkämpfer im Schottenrock antreten .
Doch auch schwäbische Tracht ist erlaubt .
Fürs &quot; Outfit &quot; vergibt die Jury noch ein paar Bonuspunkte .
Anmelden kann man sich bis eine Stunde vor Wettkampfbeginn .
Mit den schottisch @-@ schwäbischen Highlander @-@ Games und dem Traktor @-@ Pulling , das eine halbe Stunde früher beginnt , ist auf dem Festgelände am Samstag schon mal viel Action angesagt .
Abends kommen die Blasmusikfreunde auf ihre Kosten .
Um 19 Uhr gestaltet die biraböhmische Blasmusik aus Schömberg den großen Unterhaltungsabend .
Die Kapelle spielt flotte Polkas und Märsche .
Zu ihrem Repertoire gehören aber auch gefühlvolle Walzer und ein satter Big @-@ Band @-@ Sound .
Mit dabei sein wird der als singender Wirt und Schwarzwurstbaron bekannte Heinz Koch aus Weilen unter den Rinnen .
In Dornhan ist er beim Weihnachtsmarkt und bei der Narrenzunft bereits aufgetreten .
Am Sonntag unterhält der Musikverein Leinstetten zum Frühschoppen , ab 14 Uhr ist die Bauernkapelle Böffingen zu Gast , und die &quot; Oldies &quot; lassen dann das Fest ausklingen .
Auftakt ist bereits am Freitag die Stoppelackerparty mit DJ Ralf .
Weitere Programmpunkte sind am Samstag und Sonntag unter anderem das Oldtimer- und Schleppertreffen , Ausstellungen von Firmen zum Thema Land- und Forstwirtschaft .
Weitere Attraktionen am Sonntag sind das Maislabyrinth , der Handwerkermarkt und das Schafscheren .
Speziell für Kinder gibt es einen Streichelzoo , Strohhüpfburg , Traktorfahren ( unter Anleitung ) und Traktor @-@ Surfing .
Veranstalter sind der Förderverein Mehrzweckhalle , der Skiclub und die Traktorfreunde &quot; Zündkäpsele &quot; .
Milch- und Ei @-@ Alternativen im Überblick
Vegane Ernährung erfordert pflanzliche Alternativen zu Eiern , Milch und Milchprodukten .
Pürierter Tofu mit Pflanzensahne ist beispielsweise ein Quarkersatz .
Weitere nennt der Vegetarierbund zum Weltvegantag am 1. November .
Der Vegetarierbund Deutschland schlägt anlässlich des Weltvegantags am 1. November eine Reihe von veganen Alternativen vor :
Reine Pflanzenmargarine sei eine gute Alternative zu Butter , Joghurt lasse durch Sojajoghurt ersetzen .
Statt Milch könne Soja- , Hafer- , Mandel- oder Reismilch zum Einsatz kommen .
Aufschlagbare Pflanzensahne ersetze herkömmliche Schlagsahne .
Auch zu Eiern gibt es pflanzliche Alternativen .
Eine halbe zerdrückte , reife Banane zum Beispiel kann ein Ei als Bindemittel in einem Kuchen ersetzen .
Auch 50 Gramm Apfelmus oder ein Esslöffel gemahlene Leinsamen plus drei Esslöffel Wasser eignen sich dafür .
Locker werden Teige statt mit Ei zum Beispiel mit einer Mischung aus einem Teelöffel Backpulver , einem Esslöffel Speisestärke und drei Esslöffeln Mineralwasser .
Aber auch 50 Gramm Sojajoghurt oder Seidentofu können diesen Zweck erfüllen .
Nach Angaben des Vebu ernähren sich derzeit in Deutschland rund 800 000 Menschen vegan , also rein pflanzlich .
Schlaflos in New York
Auf dem Weg zu ihren Gastfamilien in Weymouth , Massachusetts , lernten die Schüler des Schwarzwald @-@ Gymnasiums die amerikanische Großstadt New York kennen .
Nach acht Stunden Flug ging es gleich los zur Brooklyn Bridge , über die zu Fuß das Herz der Stadt , Manhattan , erreicht wurde .
Hier bot sich bereits ein faszinierender Blick auf die weltbekannte Skyline , welche im Abendlicht einen besonderen Reiz ausmacht .
Durch die Zeitverschiebung waren die Schüler fast 24 Stunden auf den Beinen , aber getreu dem Motto &quot; Die Stadt schläft nicht &quot; wurde der Tag am Times Square beschlossen .
Trotz Shutdown konnte am zweiten Tag die Freiheitsstatue mit einer Fähre erreicht und zu Fuß erklommen werden .
Anschließend ging es über das Finanzzentrum um die Wall Street zur Gedenkstätte des 11. Septembers .
Am dritten Tag konnten die Schüler von der 373 Meter hoch gelegenen Aussichtsplattform des Empire @-@ State @-@ Buildings einen Überblick über die faszinierend große Stadt gewinnen und dabei die Aussicht genießen .
Danach ging es durch das hektische Treiben der New Yorker Straßen über das Rockefeller Center zum Central Park , der eine ideale Gelegenheit zum kurzen Verweilen in der Herbstsonne bot .
Nach einem kurzen Flug von New York nach Boston sind die Schüler inzwischen in ihren Gastfamilien angekommen und erleben an der Weymouth High School den Schulalltag .
Auch in diesem Jahr wird am Namenstag des Heiligen Hubertus in der Pfarrkirche St. Marien an der Hülsbergstraße eine Hubertusmesse zelebriert .
St. Hubertus war der Sage nach ein recht rücksichtsloser Jäger , der durch eine Vision bekehrt und später zum Bischof von Lüttich ernannt wurde .
Die Jagdhornbläsergruppe der Jagdreiter Westfalen unter der Leitung von Brigitte Kluth musiziert auf Parforcehörnern ( Naturhörner in der Stimmung Es ) nach alten , ursprünglich französischen Melodien .
Die Bläser tragen Reitkleidung , weil sie vornehmlich Reiter , Pferde und Hundemeute auf Schleppjagden musikalisch begleiten .
Die feierliche Messe findet statt am Sonntag , 3. November , um 11.30 Uhr .
Der neu gestaltete Opschlag glänzt mit einem neuen Cafe .
Eins , das zum Verweilen und Wiederkommen einlädt .
Eins , das den Namen zum Programm machen möchte .
Als Déjà Vu bezeichnet man laut Lexikon ein psychologisches Phänomen , das sich in dem Gefühl äußert , eine neue Situation schon einmal erlebt oder gesehen zu haben .
Im Falle des Besuchs des gleichnamigen Cafés am Opschlag in der Kreisstadt Kleve in Sichtweite zur Hochschule Rhein @-@ Waal muss es nicht beim reinen Déjà Vu @-@ Gefühl bleiben .
Schließlich hat das Café mit dem schönen Namen genau das zum Ziel : einen tatsächlichen Aufenthalt nicht nur gedanklich , sondern handfest immer wiederkehrend erlebbar zu machen .
Weil &apos; s eben Spaß macht und einfach schön ist .
Ein Blick ins Innenleben am Opschlag 8 gibt dem Betrachter auf Anhieb ein gutes Gefühl .
Das hochmoderne , aber nicht kühle Café @-@ Ambiente sieht wie ein Ort zum Wohlfühlen aus .
Hier verwöhnt das Team mit den Gründern Mirjam van der Stelt und Daniel Büttner an der Spitze den Gast mit verschiedensten Kaffee- oder Cocktail @-@ Varianten .
Dazu gibt &apos; s köstlichen Kuchen oder individuell belegte frische Baguettes .
Die Inhaber , beide 33 Jahre alt , haben sich bereits vor der Eröffnung des schmucken Cafés am Opschlag als Gastronomen einen Namen gemacht : In Kranenburg führten sie das &quot; Art Lounge &quot; .
Vom Umzug nach Kleve an den Opschlag erhoffen sich die sympathischen Café @-@ Liebhaber mehr Publikum .
Nicht zuletzt auch durch die Hochschule .
&quot; Wobei wir keine bestimmte Zielgruppe haben &quot; , betont Daniel Büttner .
Vielmehr möchte die beiden hier junge Studenten genauso ansprechen wie Senioren und alle Altersklassen dazwischen .
Apropos Café @-@ Liebhaber .
Das sympathische Inhaberpaar steht hinter dem Kaffee @-@ Genuss .
Genießt das duftende heiße Gebräu in den verschiedensten Variationen selbst .
Expressofan
Daniel Büttner ist eher der Expresso @-@ Fan und Mirjam van der Stelt die Cappuccino @-@ Trinkerin .
&quot; Dazu ein Baguette - das ist mein Ding &quot; , verrät sie der NRZ .
Zwei Events gab &apos; s auch schon im hellen Café .
Besser gesagt eins .
Denn das Hafenfest fand ja eher draußen statt - das Café Déjà Vu profitierte nicht davon .
Aber es gab auch den Ringelnatzabend .
&quot; Schön , erfolgreich und witzig &quot; , fanden die beiden 33 @-@ Jährigen .
Aber eben nicht Jedermanns Sache .
Vielleicht ist Daniel Büttner auch deswegen kein ausgesprochener Fan von Event @-@ Abenden : &quot; Man kann &apos; s ja nun mal nicht allen Recht machen &quot; .
Und mit einem Event spreche ich immer nur die an , die sich auch für das spezielle Event interessieren .
Deswegen werden Events eher die Ausnahme bei uns sein .
&quot; Wir möchten den ganz normalen Betrieb so wenig wie möglich stören &quot; .
Soll heißen : Déjà Vu steht auch für Verlässlichkeit .
In Bezug auf die Qualität der Produkte , die hier geboten werden , ebenso , wie auf das Team und die schöne Umgebung am Opschlag in Kleve .
Der Straße , die sich mehr und mehr zu einer Gastronomiemeile entwickelt .
Zur Freude vieler Klever , der Gäste aus nah und fern und der Studenten , die die Gastromeile und damit auch das Café Déjà Vu für sich entdecken .
Anke Gellert @-@ Helpenstein
Ein Tag des Dankeschöns beim MGV in Dinker
Es war das 165 . Stiftungsfest zu dem der MGV &quot; Friedrich Wilhelm Dinker &quot; in diesem Jahr eingeladen hatte und 52 Gäste , aktive Sänger und ihre Ehefrauen , waren gerne gekommen .
Im Vereinslokal der Gaststätte &quot; Witteborg &quot; in Dinker genossen alle das harmonische Miteinander ganz im Zeichen der Musik .
Traditionell ist das Stiftungsfest auch immer die passende Festivität , um Ehrungen vorzunehmen .
Über die besondere Auszeichnung &quot; Sänger des Jahres &quot; freute sich diesmal Schriftführer Rolf Wagener .
&quot; Du hast nicht nur viel für uns aufgeschrieben , sondern hast auch so manche Runde für uns gedreht , dafür unser herzliches Dankeschön &quot; , so der Vorsitzende des Chores Erich Schlotmann .
Die Auszeichnungen für die Teilnahme an den Auftritten und Chorproben mittels Aktivitätssträußchen gingen in diesem Jahr an den Chorleiter Dieter Schulze mit 44 Teilnahmen , gefolgt vom Ehrenvorsitzenden Horst Pier @-@ Ribbert , dem Vorsitzenden selbst , und dem letztjährigen &quot; Sänger des Jahres &quot; Friedrich Winkler mit jeweils 42 Teilnahmen .
Platz fünf belegte Notenwart Artur Brückner .
Ein besonders Dankeschön richtete der Vorstand an das Team von Vereinswirtin Ange Pier @-@ Ribbert , das einmal mehr ein Menü der Extraklasse gezaubert hatte und an Gerda Pier @-@ Ribbert für die Tischdekoration .
Der MGV &quot; Friedrich @-@ Wilhelm &quot; trifft sich zu seinen regelmäßigen Chorproben immer dienstags um 19.45 Uhr im Vereinslokal .
&quot; Neue sangesfreudige Stimmen sind uns jederzeit herzlich willkommen &quot; , so Schlotmann .
UN verkündet neue Ziele bei der Armutsbekämpfung
Die Vereinten Nationen beginnen ab sofort mit der Ausarbeitung einer Reihe neuer Ziele , mit denen die vor zwölf Jahren verkündeten Millenniumsentwicklungsziele zur Armutsbekämpfung ersetzt werden sollen .
Im Vorfeld des UN @-@ Gipfels für nachhaltige Entwicklung , der am Abend in Rio de Janeiro begann , spielten australische Diplomaten eine Schlüsselrolle beim Vorstoß für „ nachhaltige Entwicklungsziele “ , die die 2015 auslaufenden Millenniumsziele ersetzen sollen .
Sie wurden in den abschließenden Entwurf des Dokuments aufgenommen , der von weltpolitischen Führern , einschließlich Frau Gillard , beim Gipfel verabschiedet werden wird .
UN @-@ Generalsekretär Ban Ki @-@ moon erklärte am Abend auf dem Gipfel , der Zeitpunkt sei gekommen , „ über die nationalen Interessen hinauszudenken “ .
„ Ich freue mich , dass sich die Mitgliedsstaaten darauf verständigt haben , einen Prozess in Angriff zu nehmen , mit dem universelle , nachhaltige Entwicklungsziele vereinbart werden sollen “ , sagte er .
„ Diese Ziele werden auf unseren Fortschritten aus den Millenniumsentwicklungszielen aufbauen und einen integralen Bestandteil des Rahmenwerks für die Entwicklung nach 2015 bilden .
Ich werde keine Mühen scheuen , dieses mir von den Mitgliedsstaaten erteilte Mandat umzusetzen , um unsere Vision der nachhaltigen Entwicklungsziele zu verwirklichen , die auf dem Erfolg der Millenniumsziele aufbauen . “
Auch wenn die SG Achim / Baden seit vier Spieltagen ohne Sieg ist , herrscht beim Handball @-@ Oberligisten weiterhin gute Stimmung .
Daran lässt Trainer Tomasz Malmon überhaupt keine Zweifel .
Alle sind weiterhin voll motiviert bei der Sache .
Dennoch hoffe ich , dass wir endlich auch mal wieder gewinnen .
&quot; Denn ich weiß ja schon gar nicht mehr , wie so ein Sieg schmeckt &quot; , erwartet Malmon ein Erfolgserlebnis von seiner Mannschaft beim VfL Fredenbeck II .
Auch wenn die Drittliga @-@ Reserve aus Fredenbeck aktuell noch keine Bäume ausgerissen hat , hebt Malmon im Vorfeld warnend den Zeigefinger .
Viele Spieler habe ich selber noch in der A @-@ Jugend trainiert .
Von daher werden sie gegen ihren Ex @-@ Coach sicher ganz besonders motiviert sein .
&quot; Zudem gilt es abzuwarten , ob dann noch Verstärkung aus der Ersten dabei ist &quot; , verdeutlicht der SG @-@ Coach .
Um endlich wieder in die Erfolgsspur zurückzukehren , muss sich das Malmon @-@ Team im Vergleich zu den vergangenen Auftritten auf jeden Fall steigern .
Vor allen Dingen in der Deckungsarbeit und beim Umschaltspiel haperte es zuletzt doch gewaltig .
Auch die Chancenverwertung muss definitiv besser werden .
Daher hoffe ich , dass meine Spieler während der kurzen Pause endlich den Kopf frei bekommen haben .
Sicherheitsbedenken in Mosambik wachsen angesichts von Zusammenstößen zwischen einflussreichen Persönlichkeiten
Tausende Menschen versammelten sich im Zentrum Maputos unter den wachsamen Augen der Statue von Samora Machel , dem Staatsgründer und ersten Präsidenten Mosambiks , um bei einer seltenen öffentlichen Demonstration Friedensrufe anzustimmen .
„ Wir wollen wieder Frieden , wir wollen Stabilität “ , sagte Vanessa de Sousa , Geschäftsführerin eines Investment @-@ Unternehmens .
Aus Angst um die Zukunft des Landes hat sie ihre Geschäftskleidung gegen ein T @-@ Shirt mit der Aufschrift „ Wir fordern Sicherheit “ auf Portugiesisch eingetauscht und sich am Donnerstag der Menge auf dem Unabhängigkeitsplatz der Hauptstadt angeschlossen .
Seit zwei Wochen gibt es beinahe täglich Berichte über Zusammenstöße zwischen Regierungskräften und Renamo , die zu den schlimmsten Gefechten seit dem Friedensabkommen vor über 20 Jahren zählen .
Renamo war einstmals eine berüchtigte Rebellenbewegung , die anfänglich vom von Weißen regierten Rhodesien und später der Apartheitsregierung Südafrikas unterstützt wurde im Bemühen , die unabhängige Regierung des Landes zu destabilisieren .
Nach dem Friedensvertrag von 1992 wurde sie zu einer Oppositionspartei .
Analysten halten es für unwahrscheinlich , dass das Land wieder in einen ausgewachsenen Konflikt zurückfalle , doch haben die jüngsten Ereignisse ausländische Investoren und Einheimische beunruhigt .
Für die schnell wachsende Wirtschaft steht viel auf dem Spiel , denn die Entdeckung riesiger Gasvorkommen vor der Küste und Kohlelager im Nordwesten könnte in den nächsten Jahren Investitionen von über 50 Milliarden US @-@ Dollar von Firmen wie Rio Tinto , Vale aus Brasilien , Eni aus Italien und Anadarko aus den USA ins Land bringen .
Die regierende Frelimo @-@ Partei , seit 1975 die dominierende Kraft , und Renamo geben sich gegenseitig die Schuld für die Spannungen .
Renamo behauptet , die Regierung habe die jüngsten Zusammenstöße provoziert , indem sie am 17. Oktober ihre Mitglieder in der Provinz Sofala , einer traditionellen Hochburg Renamos , angegriffen hätte .
Die Übergriffe auf die früheren Rebellen eskalierten , als Regierungstruppen Renamo @-@ Stützpunkte attackierten und versuchten , Afonso Dhlakama zu töten , den Anführer der Gruppe , erklärte Renamos Sprecher gegenüber der Financial Times .
Die Regierung gibt Renamo die Schuld für die Zusammenstöße und beschuldigt die Organisation , Soldaten angegriffen zu haben .
Präsident Armando Guebuza hat versucht , Bedenken über eine Instabilität herunterzuspielen .
Gegenüber AFP , der französischen Nachrichtenagentur , sagte er am Mittwoch , dass Dhlakama sich als „ Verlierer “ betrachte , der „ all seine noch verbleibenden Kräfte einsetzen will , um zu beweisen , dass er der Regierung seine Entscheidungen aufzwingen kann “ .
Sowohl Frelimo als auch Renamo betonen , dass sie einen Krieg vermeiden möchten .
Doch die Bedenken haben zugenommen , seit Mazanga mit den Worten zitiert wurde , Renamo gebe das Friedensabkommen von 1992 auf .
Gegenüber der FT erklärte er , damit habe er gemeint , dass Frelimo die Vereinbarung nicht mehr respektiere .
„ Unsere Vision ist es , wieder Verhandlungen aufzunehmen und zwar ernsthaft “ , sagte Mazanga .
Frühere Gespräche zwischen den Parteien haben nur wenig zur Beilegung der Spannungen beigetragen , die durch eine Reihe von Zusammenstößen in diesem Jahr befeuert wurden .
„ Wir haben hier zwei erwachsene Männer ( Guebuza und Dhlakama ) , die die Köpfe zusammenstoßen “ , meint Joseph Hanlon , Dozent an der Open University und Mosambik @-@ Experte .
Keiner von ihnen ist gut im Verhandeln und keiner ist bereit , die nötigen Zugeständnisse zu machen .
Renamo , die auf Wahlreformen drängt , hat bereits erklärt , sie werde die Kommunalwahlen im November boykottieren .
Präsidentschafts- und Parlamentswahlen sind für nächstes Jahr geplant .
Einige Kommentatoren haben den Einsatz von Gewalt als den Versuch einer kränkelnden Bewegung interpretiert , Zugeständnisse und finanzielle Vergünstigungen von der Regierung zu erwirken .
Renamos Wahlerfolge schrumpfen seit 1992 , während eine neuere Partei , die von einem früheren Renamo @-@ Mitglied gegründete Movimento Democrático de Moçambique ( MDM ) , sich vermutlich bei den Wahlen verbessern wird .
Mazanga behauptet , dass Guebuza – dessen Rücktritt ansteht , wenn seine zweite Amtszeit im nächsten Jahr endet – die Demokratie des Landes zerstören wolle .
„ Er will keine Mehrparteien @-@ Demokratie , er will keine transparenten Wahlen , er will keinen Frieden , weil er das Präsidentenamt nicht aufgeben will “ , so Mazanga .
Es ist unklar , über welche Kapazitäten Renamo verfügt , doch sie hat Unruhe stiftende Angriffe auf Polizeistationen und Fahrzeuge auf einer wichtigen Nord @-@ Süd @-@ Verbindungen unternommen .
Die meisten Gefechte fanden in der Provinz Sofala statt , die einige Hundert Kilometer nördlich von Maputo liegt , in der sich aber Beira befindet , der Hafen , den Bergbaufirmen wie Rio Tinto und Vale zum Export von Kohle nutzen .
Im Juni unterbrach Rio einen Monat lang die Nutzung der Eisenbahn , nachdem Renamo einen Angriff auf die Strecke angekündigt hatte .
Mazanga antwortete zurückhaltend auf die Frage , ob Renamo diese Drohung wiederholen werde .
Renamo wollte „ die internationale Gemeinschaft warnen , dass die Dinge in Mosambik nicht gut stehen “ , sagte Mazanga .
Die Instabilität habe die Frustration über die Regierung noch gesteigert , sagt Fernando Lima , Leiter von Mediacoop , einem unabhängigen Medienunternehmen , denn viele Menschen sorgten sich bereits wegen der Korruption , den schleppenden Fortschritten bei der Entwicklung und einer kürzlichen Entführungswelle .
„ Die Menschen denken , dass die Regierung und der Präsident für die Zukunft des Landes verantwortlich sind und er derjenige sein sollte , der Lösungen für die Probleme findet “ , erklärt er .
Omar Sultane , ein Demonstrant , sagte , die Menschen wollten einfach nur Stabilität .
„ Keinen interessieren Renamo und Frelimo , sie wollen einfach nur wieder Frieden und benutzbare Straßen “ , erklärte er .
Kinder sollten Mythen und Legenden als „ Vorbilder für das Leben “ beigebracht bekommen , meint ein Autor .
Die Geschichten von Thor zeigten , dass „ brutale Kraft keine Chance hat gegen clevere Tricks “ , und die Artus @-@ Legende demonstriere , wie wichtig es sei , einen Traum zu haben .
Viele der Mythen seien allerdings „ bei weitem zu wild , zu anstößig und in manchen Fällen zu schmutzig , um an Schulen gelehrt zu werden “ , weshalb Crossley @-@ Holland für eine „ sorgfältige Auswahl “ altersgerechter Werke plädierte .
„ Ich finde es wundervoll , dass in Amerika Mythen und Folklore bereits Teil der Bildung sind “ , sagte er .
Ich habe das schon seit zwanzig Jahren als Plan vorgeschlagen .
Er fügte hinzu , bei Autoren und Lehrern , die „ übermäßig didaktisch “ seien , würden Kinder „ komplett abschalten “ , denn in unterhaltsamen Geschichten würden die Botschaften „ unterschwellig “ vermittelt .
Crossley @-@ Holland , der Beowulf aus dem Angelsächsischen übersetzt hat und Autor des Penguin Book of Norse Myths und der British Folk Tales ist , erklärte : „ Man kann bestimmte Absichten verfolgen , aber man sollte sie möglichst im Hintergrund halten . “
Der vielleicht größte Unterschied zwischen einem erwachsenen Autor , der für Erwachsene schreibt , und einem Autor , der für Kinder schreibt , liegt in der Notwendigkeit , Hoffnung zu vermitteln .
Nicht alles muss vereinfacht werden oder zum Happy End führen , aber es gibt einen immanenten Sinn für Gut und Böse .
Dieser muss unterschwellig dargestellt sein , durch die Geschichte offenbart werden und nicht erklärt .
Das ist die alte Geschichte vom Zeigen statt Erzählen .
Hansjakob zieht noch einmal in Freihof
Vor 100 Jahren hat Heinrich Hansjakob seinen Altersruhesitz in Haslach bezogen , am Sonntag wurden seine letzten Jahre im &quot; Freihof &quot; lebendig .
Die vielen Zuschauer waren vom äußerst kurzweiligen Szenenspiel begeistert .
Von der Ankunft über die Verleihung der Ehrenbürgerschaft bis hin zu seinem Tod hatte Drehbuchautor und Hansjakobdarsteller Alois Kraftzcyk ein unterhaltsames Stück entworfen , das unter der Regie von Cornelia Volk viel Beifall bekam .
Marcus Zagermann nahm das Publikum als Sprecher mit durch die zehn verschiedenen Szenen , erklärte Zusammenhänge und überbrückte Zeitsprünge von der Jugend bis zur nahenden Pensionierung .
Am 22. Oktober 1913 kommt Hansjakob heim in seinen Kinderhimmel , in seinen Freihof .
Und dann begann das Szenenspiel , in dem Alois Krafczyk einmal mehr in seiner Paraderolle als großer Sohn der Stadt glänzte .
Stilecht fuhr er mit dem Zweispänner und &quot; Schwarzwälder Füchsen &quot; von Erich Becherer aus Mühlenbach vor .
Er wurde nicht nur vom Publikum mit viel Applaus empfangen , auch seine Schwester Philippine hieß ihn willkommen .
Billy Sum @-@ Hermann verstand es unglaublich gut , sich in die Rolle der Schwester hineinzuversetzen und verlieh ihr in Mimik und Gestik ungeheures Leben .
Zwischen den einzelnen Spielszenen spielte die Mühlenbacher Bauernkapelle passend ausgewählte Musikstücke und rundete damit die Aufführung ab .
Zur Verleihung der Ehrenbürgerwürde gab sich dann Haslachs Bürgermeister Heinz Winkler die Ehre , der in Vertretung des damaligen Amtsinhabers Hättich zusammen mit einem Teil des Stadtrates seine Aufwartung machte .
Ihre Aufwartung machten anschließend die Dreikönig- singer , die Hansjakob zu dem Ausruf veranlassten : &quot; Ach wie schön , da werden wieder Jugenderinnerungen an meine eigene Dreikönigzeit lebendig &quot; .
Mit ihrem Lied &quot; O Jesulein &quot; erfreuten sie das Publikum im Freihof ebenso wie die Storchentagskinder mit ihrem lauten &quot; Heraus , Heraus &quot; .
Seine Kritik an der Amtskirche hatte Hansjakob damals genauso geäußert , wie seine Bedenken über die Auswüchse in der Landwirtschaft , die Folgen der Industrialisierung oder die Auswirkungen des Krieges .
In der Heimaterde , hinter seiner Grabkapelle auf der Brand bei Hofstetten , fand er seine Ruhestätte .
&quot; Ein unruhiger Geist hatte endlich seine Ruhe gefunden und war für immer heimgegangen &quot; , hieß es am Ende des Szenenspiels .
Viel Applaus und viele lobenden Worten gab es vom Publikum für die Aufführung .
Basketball : Die Hoffnung der Neckar Riesen wächst
Die Chancen auf den Ligaverbleib der sportlich abgestiegenen Ludwigsburger Bundesliga @-@ Basketballer sind gestiegen .
Denn sollte es ein Wildcard @-@ Verfahren geben , dann gibt es für die Neckar Riesen nun einen Mitbewerber weniger .
Das Basketball @-@ Projekt Hamburg Towers verzichtet auf eine Bewerbung für einen möglichen Nachrückerplatz .
&quot; Wir werden nicht am Wildcard @-@ Verfahren teilnehmen &quot; , sagte Ex @-@ Nationalspieler Pascal Roller , der seit 2012 das Konzept für einen Proficlub in der Hansestadt aufstellt .
Ein erstes Aufatmen war aus Ludwigsburg dennoch nicht zu vernehmen .
&quot; Wir beschäftigten uns nicht mit dem Wildcard @-@ Verfahren , so lange nicht feststeht , dass Düsseldorf keine Lizenz erhält &quot; , sagte Neckar @-@ Riesen @-@ Boss Alexander Reil unserer Zeitung .
Bis zum 23. Mai kann Aufsteiger Düsseldorf Baskets noch Unterlagen beim Schiedsgericht einreichen und seine wirtschaftliche Bundesliga @-@ Tauglichkeit nachweisen .
Bisher wurde den Rheinländern die Lizenz aber zweimal verweigert .
Das Schiedsgericht ist die letzte Instanz .
Haigerloch : Abendmahlskirche rückt in den Blickpunkt
Als Beitrag der Stadt zum 150 @-@ jährigen Bestehend der Evangelischen Kirche in Haigerloch widmet das Kultur- und Tourismusbüro der Stadt die letzte ihrer diesjährigen öffentlichen Themenführungen am Sonntag , 27. Oktober , der Abendmahlskirche .
Nach dem Besuch des Atomkeller @-@ Museums soll die Haigerlocher Zeit nach 1850 betrachtet werden , als Haigerloch unter preussische Herrschaft kam .
Krönender Schlusspunkt ist dabei ein Besuch in der Abendmahlskirche .
Dort bekommen die Führungsteilnehmer die Geschichte vom Bau der Kirche erzählt und gewinnen Einblicke in die Entwicklung der evangelischen Gemeinde in einer durch und durch katholischen Gegend .
Nicht zuletzt fällt in der Kirche auch der Blick auf das von Friedrich Schüz mit Unterstützung von Walter Kröll und Georg Halbritter geschaffene Abendmahlgemälde .
Es ist eine orginalgetreue Reproduktion des berühmten Mailänder Vorbildes von Leonardo da Vinci .
Treffpunkt zu der andert halbstündigen Führung ist um 15 Uhr am Atomkeller @-@ Museum .
Karten gibt es an der Kasse des Atomkellermuseums .
Für Fragen und Informationen steht das Tourismusbüro der Stadt Haigerloch zur Verfügung .
Snowden könnte auch in Russland aussagen
Der frühere US @-@ Geheimdienstexperte Edward Snowden könnte in der US @-@ Spähaffäre auch in seinem russischen Asyl Aussagen machen .
Vertreter der Bundesgeneralstaatsanwaltschaft könnten entweder schriftlich Fragen stellen oder den 30 @-@ Jährigen auch persönlich in Russland treffen .
Das meldete die Agentur Interfax unter Berufung auf nicht näher benannte Kreise , die mit der Lage vertraut seien .
Eine solche Frage könne zwischenstaatlich geklärt werden , hieß es .
Eine Ausreise Snowdens aus Russland ist praktisch ausgeschlossen .
&quot; In diesem Fall verliert er seinen Flüchtlingsstatus &quot; , zitierte die Agentur ihre Quelle .
Weil Deutschland Verbündeter der USA sei , drohe Snowden dort die Auslieferung , hieß es weiter
Langer Atem macht sich bezahlt
Sechs Männermannschaften kämpften beim Tennisturnier der Vereine um den Siegertitel .
Am Ende entschied die Ausdauer vom Team Maier / Bronner das letzte Match .
Ein Traumwetter hatte die Tennisabteilung der Sportfreunde Rohrdorf zum Turnier der örtlichen Vereine und Freunde erhalten .
Der Spaß am Tennisspielen stand im Vordergrund des Turniers .
Es standen fünf Spiele pro Team auf dem Plan , wobei jeder gegen jeden spielte .
Gespielt wurde im Doppelmodus mit einem langen Satz bis zu neun Punkten oder maximal 45 Minuten Dauer .
Anja Schlichter leitet das Turnier
Die Turnierleitung lag in den bewährten Händen von Anja Schlichter , unterstützt wurde sie von Carmen Müller und Inga Kronemeyer .
Nach den ersten drei Spielen und einer Mittagspause mit Pasta ging das Turnier in die entscheidende Phase .
Die Favoriten Andre Maier / Matthias Bronner lagen punktgleich mit Michael Klippel und Sadmin Osmicic ( beide Teams der SG Rohrweiler ) , so dass die letzten beiden Matches die Entscheidung bringen mussten .
Bei der Siegerehrung konnte Carmen Müller den Wanderpokal schließlich an Andre Maier / Matthias Bronner überreichen , die auf der Zielgerade den längsten Atem hatten .
Den zweiten Platz belegte das Doppel Michael Klippel / Sadmin Osmicic .
Das Bronzetreppchen erreichten Rainer und Bernd Maier des Teams Asphaltriecher .
Bei Spätnachmittagsonne und Kaffee und Kuchen fand der gelungene Ausklang des Turniers statt .
Am letzten Augustwochenende ist das Schwarzwälder Freilichtmuseum Vogtsbauernhof in Gutach bei Hornberg wieder fest in Kinderhand .
Traditionell heißt das Museum die Besucher am Samstag und am Sonntag , den 24. und 25. August , im Rahmen des Sommerferienprogramms zu einem bunten Kinder- und Familienfest mit zahlreichen Mitmachaktionen und Veranstaltungen willkommen .
&quot; Groß und Klein können an beiden Tagen verschiedene alte Handwerke erlernen &quot; , heißt es in der Pressemitteilung .
Ob Seife herstellen , Kerzen drehen , filzen oder Seile fertigen , für jedes Alter ist das Passende dabei .
Den Kindern stehen regionale Handwerker von 11 bis 17 Uhr helfend zur Seite .
In der Museumswerkstatt wird ebenfalls gewerkelt .
Beim Bau von Kuckuckspfeifen , Wasserrädern oder Kreiseln können die jungen Gäste ihr handwerkliches Geschick unter Beweis stellen .
Viel Spaß versprechen auch die vielen alten Spiele , wie Schubkarren @-@ Rennen oder Stelzenlaufen .
Schnelligkeit und Koordination sind hier gefragt .
Für alle kleinen Detektive bietet das Freilichtmuseum am Samstag und am Sonntag , jeweils um 12 und 14 Uhr , eine Rätselführung durch das Museum an .
Auf einem Geländerundgang müssen die Kinder erraten , welche Geschichten der Wahrheit entsprechen oder doch gelogen sind .
Darüber hinaus haben die Besucher die besondere Gelegenheit , das Freilichtmuseum während einer Kutschfahrt mit Schwarzwälder Füchsen kennenzulernen .
Nicht nur Pferde , sondern auch viele weitere Tiere wie Schafe , Ziegen , Kühe und Hühner sind auf dem Gelände anzutreffen und zu bestaunen .
Zusätzlich dürfen sich alle Kinder am Sonntag auf den Clown Otsch freuen , der seinen Schabernack ab 11 Uhr mit den Museumsgästen treibt .
Gemütlich und märchenhaft geht es unterdessen bei Hermann Büttner zu .
Der Geschichtenerzähler nimmt die kleinen Gäste um 11 , 13 und 15 Uhr mit in die wunderbare Welt der Märchen .
Zudem führt die Kindertrachtentanzgruppe aus Gutach um 11.30 Uhr traditionelle Tänze vor .
Des Weiteren lassen sich an beiden Veranstaltungstagen von 11 bis 17 Uhr zahlreiche Handwerker wie der Besenbinder , die Näherin , die Spinnerin , die Weberin und die Bäckerin bei ihrer traditionellen Arbeit über die Schulter schauen .
Noch bis zum Ende der Sommerferien in Baden @-@ Württemberg erwartet die Besucher des Freilichtmuseums ein abwechslungsreiches Ferienprogramm .
In einer neuseeländischen Kleinstadt gilt Burt Muro als liebenswerter Kauz , weil er sich vorgenommen hat , mit seinem Motorrad , Baujahr 1920 , an einem Rennen in Amerika teilzunehmen .
Burt ist trotz eines Herzfehlers nicht von seinem Traum abzubringen .
Mit seinem Ersparten , einpaar Spenden und einer Hypothek auf seinen alten Werkstattschuppen setzt er per Schiff nach Los Angeles über .
Nach dem Film gibt es Kaffee , Tee und Kuchen .
Schrilles Piepsen stört Anwohner
Rhenus Midgard hat auch an Land kräftig investiert .
Sie verteilen die von den Schiffen kommende Kohle auf die Halde .
Das Unternehmen hat am Standort gleich mehrere Eisen im Feuer .
Neben dem Kohleimport setzt Rhenus Midgard unter anderem auf Windanlagen @-@ Logistik .
Schwarz schimmert die Steinkohle auf dem Lagerplatz vor dem Deich .
Zwei gewaltige blaue Haldenschütt- und Rückladegeräte verteilen oder verladen die Kohle hier nach Bedarf .
Bei jeder Bewegung der Umschlaggeräte tönt ein schrilles Warngeräusch übers Gelände .
&quot; Die Signale dienen der Sicherheit und sind gesetzlich vorgeschrieben &quot; , sagt Matthias Schrell , Geschäftsführer der Rhenus Midgard in Wilhelmshaven .
Bei ungünstig stehendem Wind ist das leider weithin zu hören - und so gab es bereits einige Beschwerden von Leuten aus dem Stadtnorden .
Er nehme die Klagen sehr ernst und habe deshalb Kontakt aufgenommen mit den Betroffenen , sagt der 40 @-@ Jährige .
In enger Absprache mit den Behörden sei man nun dabei , die Warnsignale mit technischen Maßnahmen leiser zu halten .
Auch künftig setze er auf den offenen Dialog mit den Nachbarn .
Denn Matthias Schrell hat noch einiges vor am Standort .
Mit dem Ausbau der Niedersachsenbrücke setzt Rhenus Midgard weiterhin auf den Kohleimport für Kraftwerke und ist auf diesem Sektor einer der Großen in Europa .
Dank der auf 18,5 Meter vertieften Liegewanne vorm Terminal können längst auch Capesize @-@ Bulkcarrier hier abgefertigt werden .
&quot; In diesem Jahr wollen wir beim Umschlag die 3 @-@ Millionen @-@ Tonnen @-@ Marke knacken &quot; , so Schrell .
Neben dem Eon @-@ Kraftwerk vor Ort geht die Importkohle zu Kraftwerken im Binnenland .
Wenn dann noch das GDF @-@ Suez @-@ Kraftwerk ans Netz gehe , seien gut 5 Millionen Tonnen Kohleimport pro Jahr realistisch .
Die drei Schiffsentlader auf der Brücke sowie das zweite Transportband könnten bis zu 10 Millionen schaffen .
Bayerns Basketballer trotz erster Niederlage optimistisch
Selbst die erste Niederlage in der Euroleague konnte bei den Basketballern des FC Bayern München den riesigen Optimismus nicht schmälern .
&quot; Niemand kann uns verbieten daran zu glauben , auch gegen das beste Team Europas der vergangenen beiden Jahre zu gewinnen &quot; , bilanzierte Bayern @-@ Coach Svetislav Pesic nach dem unglücklichen 83 : 88 ( 39 : 47 ) am Donnerstagabend bei Titelverteidiger Olympiakos Piräus .
Wir haben die Message gesendet : Auch in München existiert Basketball !
Bei ihrem erst dritten Auftritt in der europäischen Königsklasse verkauften sich die Münchner lange sehr gut , waren in den entscheidenden Phasen aber einfach nicht abgeklärt genug .
Die Gäste schafften zunächst das Kunststück , einen 15 @-@ Punkte @-@ Rückstand 13 Minuten vor Schluss noch in eine Führung umzuwandeln , ehe Piräus dem Spiel erneut eine Wende gab .
&quot; Wir haben uns unglaublich zurückgekämpft gegen den zweimaligen Euroleague @-@ Champion , aber dann wieder leichtsinnige Fehler gemacht &quot; , sagte Bayern @-@ Profi Yassin Idbihi .
Wir sind stolz auf unsere Leistung , aber wir wollen jedes Spiel gewinnen .
Malcolm Delaney und Nihad Djedovic waren die erfolgreichsten Werfer der Münchner , die in den ersten beiden Partien gegen den italienischen Serienmeister Montepaschi Siena und den polnischen Titelträger Zielona Góra deutliche Siege gefeiert hatten .
Ben Greenman : Zehn Jahre New York Comedy Festival : The New Yorker
Man könnte sagen , dass New York City die Geburtsstätte von Stand @-@ up Comedy in Amerika ist : Vor knapp hundert Jahren fing der Varietekünstler Frank Fay , der als Conférencier im Palace Theatre am Broadway arbeitete , damit an , der Menge direkt Witze in Form eines Gesprächs zu erzählen .
Im Laufe der Jahre wurde Fays Innovation ausgebaut , so wie zuletzt auf dem New York Comedy Festival .
Ins Leben gerufen und geleitet von Caroline Hirsch , der Gründerin der Stand @-@ up @-@ Institution Carolines , feiert das Festival in diesem Jahr sein zehnjähriges Jubiläum mit über sechzig Shows in kleinen Clubs und großen Theatern .
„ Die meisten dieser Headliner fingen bei Carolines an und wurden dann immer erfolgreicher , bis sie irgendwann zu bekannt waren , um in einem Club aufzutreten “ , sagte Hirsch .
Wir haben dieses Festival konzipiert , damit wir weiter mit ihnen arbeiten können .
Bei der diesjährigen Veranstaltung gibt es Auftritte von Wanda Sykes , Kathy Griffin und Bill Maher sowie auch von „ Stand Up for Heroes “ , einer jährlichen Musik- und Comedy @-@ Benefizveranstaltung für Armeeveteranen im Madison Square Garden , bei der unter anderem Bruce Springsteen , Jon Stewart , Roger Waters und Bill Cosby auftreten .
Mit dem Festival ist auch die Welt der Comedy gewachsen .
Eine Reihe der Comedians , die dieses Jahr am Festival teilnehmen , sind über eher unkonventionelle Wege bekannt geworden , wie beispielsweise Sendungen auf kleineren Fernsehkanälen wie Comedy Central , FX und Spike .
Nick Kroll wurde mit einer Sitcom im Kabelfernsehen bekannt ( die ironisch @-@ schlüpfrige Fantasy @-@ Football @-@ Serie „ The League “ auf FXX ) und hat jetzt seine eigene Sketch @-@ Show auf Comedy Central .
Jenny Slate war sowohl bei „ Saturday Night Live “ als auch bei „ Parks and Recreation “ Teil der Besetzung , obwohl sie am bekanntesten für ihre virale Videoserie „ Marcel the Shell with Shoes On “ ist .
Sowohl Kroll als auch Slate und andere junge Comedians mit charakteristischen Stimmen ( der surreal pessimistische Anthony Jeselnik , der ironische , auf Rassenthemen konzentrierte W. Kaumau Bell ) sind Produkte der dezentralisierten Welt der amerikanischen Comedy .
Zu den größten Besuchermagneten des Festivals gehört ein Interview : David Steinberg spricht mit Larry David .
Steinberg begann als Stand @-@ up Comedian , hat sich aber zu einem angesehenen Fernseh- und Filmregisseur sowie zu einem inoffiziellen Comedy @-@ Historiker entwickelt .
Von 2005 bis 2007 moderierte er eine Fernsehsendung mit dem Titel „ Sit Down Comedy with David Steinberg “ bei TV Land .
Das Treffen findet in der Town Hall mitten in Manhattan statt .
„ Die Stadt ist definitiv in der Comedy @-@ DNA von Larrys gesamter Arbeit “ , sagte Steinberg .
Er hat mir erzählt , wenn er hier ist , dann gehe er manchmal durch die Gasse zwischen zwei Gebäuden und denkt sich : Hey , wenn ich mein ganzes Geld verliere , dann lebe ich vielleicht hier .
Iran zufrieden mit Prozess der Atomverhandlungen
Der Iran zeigt sich eine Woche vor dem nächsten Atomtreffen mit den fünf UN @-@ Vetomächten und Deutschland zufrieden mit dem Verhandlungsprozess .
&quot; Nach Jahren habe man nun eine Einigung mit der Internationalen Atomenergiebehörde , um die Differenzen der letzen Jahre auszuräumen &quot; , schrieb Außenminister Mohammed Dschawad Sarif auf seiner Facebookseite .
Es wäre zwar noch ein langer Weg , aber der Atomchefunterhändler sei mit dem Verhandlungsprozess zufrieden und auch optimistisch , dass am Ende beide Seiten zu einer Lösung kommen .
Drama in Uruguay : Jungen töten Spielkamderaden mit Machete
Zwei Kinder haben in Uruguay den Mord eines 11 @-@ Jährigen eingestanden .
Die beiden 14 und 12 Jahre alten Jungen hatten ihr Opfer eingeladen , mit ihnen auf Vogeljagd zu gehen .
Mit Macheten und Messern bewaffnet erstachen sie am Dienstag den 11 @-@ Jährigen und warfen den Leichnam in einen Brunnen , berichtete die Zeitung &quot; El País &quot; am Donnerstag .
Anschließend hätten sie vor ihren Wohnungen in einem Arbeiterviertel Fußball gespielt .
Der Leichnam wurde in der folgenden Nacht in der Ortschaft Cerro Pelado , 15 Kilometer nördlich vom exklusiven Strandort Punta del Este aufgefunden .
Als Alibi sollte eine fünfjährige Halbschwester des Jüngeren , die sie mitgenommen hatten , aussagen , sie sei von dem Jungen sexuell angegriffen worden .
Als das Mädchen aber vor der Polizei den Tathergang ohne Erwähnung eines Angriffs gegen sie beschrieb , gaben die zwei Jungen die vorsätzliche Tötung des 11 @-@ Jährigen zu .
Als Grund nannte der Ältere unter anderem eine Rivalität im Fußballspiel .
Er wurde vorläufig in eine psychiatrische Jugendanstalt eingeliefert .
Zuhälter muss ins Gefängnis
Wegen ausbeuterischen Menschenhandels , Zuhälterei , Bedrohung , Beleidigung und gefährlicher Körperverletzung hat das Landgericht Konstanz einen 33 @-@ jährigen Mann aus St. Georgen zu dreieinhalb Jahren Haft verurteilt .
Der ehemalige Bundeswehrsoldat , der nach zwei Einsätzen in Afghanistan als Türsteher arbeitete , legte im Rahmen einer Prozessabsprache ein Geständnis ab .
Demnach hat er in fünf Fällen Frauen über Internet- oder Telefonkontakte kennengelernt , die er nach einigen Wochen gegen ihren Willen auf den Strich schickte .
Widerstand pflegte er mit Gewalt und Drohungen zu brechen .
Die Einnahmen der Frauen , die zum Teil jahrelang für ihn anschafften , behielt er ein .
Durch Konfiszierung von Handys und SIM @-@ Karten unterband er Kontakte der Frauen zur Außenwelt .
Zusammen mit einem Kollegen , der die Frauen vermittelte , brachte er sie in verschiedene Bordelle im Südwesten .
Dort ließ er sie zum Teil überwachen , um ihre Einnahmen zu kontrollieren .
Vor Gericht behauptete der Angeklagte zunächst , er leide unter einem schweren Trauma , nachdem Kollegen in Afghanistan neben ihm bei einer Explosion ums Leben gekommen seien .
Nachdem ein psychiatrischer Sachverständiger große Zweifel an der psychischen Einschränkung und damit an einer eingeschränkten Schuldfähigkeit andeutete , legte der 33 @-@ Jährige ein umfassendes Geständnis ab .
Das Gericht musste keine der geschädigten Frauen mehr vernehmen .
Wie ein Kripo @-@ Beamter berichtete , konnten nach einer ersten Anzeige durch Telefonüberwachungsmaßnahmen mindestens vier weitere Fälle von ausbeuterischem Menschenhandel ermittelt werden .
Die abgehörten Gespräche seien von hoher Aggression geprägt gewesen .
In späteren Vernehmungen hätten die Geschädigten ihr Martyrium bestätigt .
Eine weitere Zeugin , bei der eine der Frauen am ganzen Körper blaue Flecken entdeckt hatte , habe bis heute keine Aussage gemacht .
Es handle sich um &quot; eine völlig gebrochene Persönlichkeit &quot; , die Gewalt und Ausbeutung in diesem Metier als normal ansehe .
Der Angeklagte bedauerte sein Verhalten gestern .
&quot; Er habe sich aus diesen Kreisen gelöst und wolle nach der Haft ein ganz normales Leben führen &quot; , meinte er .
Ölpreis gibt weiter nach bis auf 96 USD pro Barrel
Der Ölpreis ist auch am Freitag weiter gefallen , nachdem Sorgen über ein hohes Angebot einen Bericht überschatteten , wonach der energiehungrige Fertigungssektor Chinas wächst .
Die Referenzrohölsorte für Lieferungen im Dezember war am späten Morgen in Europa im elektronischen Handel an der New York Mercantile Exchange um 14 Cent auf 96,24 USD pro Barrel gefallen .
Der Vertrag fiel um 39 Cent am Donnerstag , was einen Preisverfall von 5,8 Prozent im Oktober bedeutete .
Das große Rohölangebot hat die Preise in den vergangenen Wochen belastet .
Das Energieministerium der USA erklärte am Mittwoch , das US @-@ Angebot habe letzte Woche um 4,1 Millionen Barrel zugenommen .
Im Laufe von fünf Wochen war das Angebot um 25 Millionen Barrel gestiegen .
Doch am Freitag gab es Hinweise auf stärkere Nachfrage durch zwei Berichte über einen Aktivitätszuwachs in der chinesischen Fertigung .
Dies deutet auf eine fortgesetzte Erholung der Wirtschaft Chinas hin , deren Wachstum auf 7,8 Prozent im dritten Quartal angestiegen war , nachdem es im vorherigen Quartal auf dem niedrigsten Stand seit zwei Jahrzehnten angelangt war .
Rohöl von der Sorte Brent , ein Referenzwert für internationales Rohöl , das auch von US @-@ amerikanischen Raffinerien verwendet wird , fiel an der ICE Exchange in London um 26 Cent auf 108,58 USD pro Barrel .
Gericht blockiert Entscheidung zur Stop @-@ and @-@ Frisk @-@ Richtlinie des NYPD
Ein Bundesberufungsgericht in den USA blockierte am Donnerstag die Anordnung einer Richterin , die Änderungen am Stop @-@ and @-@ Frisk @-@ Programm ( „ Anhalten und durchsuchen “ ) des New Yorker Polizeidepartments gefordert hatte , und entband die Richterin von dem Fall .
Das 2. US @-@ Berufungsgericht erklärte , die Entscheidungen von Richterin Shira Scheindlin würden ausgesetzt , bis über eine Berufung der Stadt entschieden sei .
Die Richterin hatte im August geurteilt , die Stadt verstoße gegen die Verfassung mit der Art und Weise , wie das Programm für das Anhalten und Befragen von Personen umgesetzt werde .
Die Stadt legte Berufung gegen ihre Einschätzung und die angeordneten Abhilfemaßnahmen ein , einschließlich der Entscheidung , eine Überwachungsstelle einzurichten , die die Polizei bei der Änderung ihrer Richtlinie und des entsprechenden Schulungsprogramms unterstützen solle .
Das Berufungsgericht hörte am Dienstag die Argumente zur geforderten Aussetzung .
Das Berufungsbericht erklärte , die Richterin müsse von dem Fall entbunden werden , da sie den Verhaltenskodex für US @-@ amerikanische Richter verletzt habe , indem bestimmt ist , dass ein Richter den Anschein der Parteilichkeit vermeiden soll ; dies wurde teilweise mit einer Reihe von Medieninterviews und öffentlichen Aussagen begründet , in denen sie öffentlich auf die Kritik des Gerichts reagiert hatte .
Die Richterin hatte geurteilt , Polizeibeamte verletzten die Bürgerrechte von Zehntausenden von Menschen , weil sie in unangemessener Weise gezielt schwarze und lateinamerikanische Männer mit dem Stop @-@ and @-@ Frisk @-@ Programm ins Visier nähmen .
Sie ernannte eine externe Stelle zur Überwachung der Umsetzung wesentlicher Änderungen , einschließlich Reformen bei Richtlinien , Schulung und Dienstaufsicht , und ordnete ein Pilotprogramm mit am Körper getragenen Kameras in Vierteln an , in denen die meisten Kontrollen durchgeführt wurden .
Im August erklärte sich die Stadt New York bereit , die Praxis der Speicherung von Namen und Adressen von Personen zu beenden , die nach einer Kontrolle durch die Polizei wieder entlassen wurden .
Eine mündliche Verhandlung zur Berufung der Stadt ist nach dem 14. März 2014 geplant .
Die Stop @-@ and @-@ Frisk @-@ Taktik wurde von einer Reihe von Bürgerrechtsverfechtern kritisiert .
Kontrollen dieser Art gibt es seit Jahrzehnten in verschiedenen Formen , doch stieg die Anzahl der aufgezeichneten Kontrollen während der Amtszeit des parteilosen Bürgermeisters Michael Bloomberg auf ein Allzeithoch von 684.330 im Jahr 2011 , die meisten davon schwarze und lateinamerikanische Männer .
2004 wurde von vier Männern , die alle Minderheiten angehörten , Klage eingereicht , die sich zu einer Sammelklage entwickelte .
Befürworter von Änderungen am Stop @-@ and @-@ Frisk @-@ Programm des NYPD sagen , die Veränderungen werden unfaire Praktiken beenden und eine vertrauenswürdigere und effektivere Polizei schaffen sowie die Art und Weise beeinflussen , wie andere Polizeipräsidien die Regelung einsetzen .
Gegner sind der Ansicht , die Veränderungen würden die Moral der Polizei dämpfen , aber nicht die Kriminalität ; auch würde Geld verschwendet und das breitere Problem einer Polizei nicht gelöst , die nach dem Wegfall Tausender von Stellen im letzten Jahrzehnt unter Druck stehe .
Die Richterin wies darauf hin , dass sie die Stop @-@ and @-@ Frisk @-@ Praxis nicht beende , die verfassungsmäßig sei , sondern nur die Art der Umsetzung der Kontrollen durch das NYPD reformiere .
Vom Glück der träumenden Kamele
Glück ist eine Oase , die zu erreichen nur träumenden Kamelen gelingt
Mit dieser Beduinenweisheit beschrieb der erste Vorsitzende Wolfgang Henne die Geschichte und Faszination des Vereins &quot; Helfende Hände &quot; .
Am Samstagnachmittag wurde der zehnte Geburtstag des Vereins gefeiert , der schon beachtliche Erfolge aufweisen kann .
Der erste Vorsitzende Henne berichtete ausführlich von der Arbeit des Vereins .
Er selbst war im Jahr 2004 das erste Mal in Mauretanien im Cheijk @-@ Zajed @-@ Krankenhaus in Nouakchott .
In der Folge entwickelte sich eine weitere Kooperation , und der Gynäkologe Henne führte vor Ort auf mehreren Reisen zahlreiche Operationen durch .
Während der Reden wurden Bilder von den Einsätzen auf einer großen Leinwand gezeigt , so dass sich die Gäste der Jubiläumsveranstaltung von den erwähnten Aktionen ein Bild machen konnten .
Das Wüstenfahrzeug des Vereins wurde auch gezeigt .
Es handelt sich um ein ehemaliges Bundesgrenzschutzfahrzeug .
Rainer Prewo , der ehemalige OB von Nagold , hatte den Vorschlag gemacht , dieses Fahrzeug mit einer Fotovoltaikanlage auszustatten und plant nun , laut Henne , beim Verein in beratender Funktion tätig zu werden .
Im Jahr 2008 hat die Zimmerei Schleeh aus Baiersbronn in der Rekordzeit von knapp einer Woche die Krankenstation in Socogim , ein Elendsviertel am Rande der Hauptstadt erstellt - ehrenamtlich .
Henne erwähnte auch ein neues Mutter @-@ Kind @-@ Krankenhaus in Nouakchott
Besonders interessant in Zeiten in denen in Nagold die Geburtsklinik wegrationalisiert werden soll .
Man lerne viel in Afrika als Mediziner , so Henne , zum Beispiel Entschleunigung gegen Burn @-@ out .
Aufgrund der politischen Unruhen im Land konnte man nicht so viele Reisen wie geplant unternehmen , aber dafür kamen viele Mediziner nach Deutschland , um hier in verschiedenen Bereichen zu hospitieren .
Außerdem werden regelmäßig Container mit Material nach Afrika geschickt , so im März diesen Jahres medizinische Geräte , Medikamente , Verbandsmaterial , Krankenhausbetten und Brillen .
Mitinitiator Hans @-@ Joachim Fuchtel selbst lieferte reichlich Lokalkolorit , indem er aus Mauretanien von zum mobilen Ziegenstall umgebauten Mercedes @-@ Fahrzeugen erzählte und die Erlebnisse der Stammheimer Musiker , welche den Verein traditionell unterstützen , bei ihrer Mauretanienreise schilderte .
Als seine persönlichen Beweggründe nannte er seine Arbeit im Bereich Rechnungsprüfung als junger Abgeordneter .
Als ihm klar geworden sei , wie viel Geld unterwegs verloren ging , habe er beschlossen , den Afrikanern bei der Kontrolle eines Budgets durch das Volk zu helfen .
Außerdem betonte Fuchtel , dass globale Wirtschaft auch globale Menschenliebe verlange .
Es solle auch keineswegs vergessen werden , dass Afrika näher liegt als mancher denke .
Von Gran Canaria sei es nicht weit nach Afrika .
Coulson setzte Telefon @-@ Hacking für das Überprüfen eines Tipps ein
Der frühere News of the Word @-@ Herausgeber Andy Coulson setzte angeblich „ Telefon @-@ Hacking , Überwachung und Konfrontation “ beim Versuch ein , einen falschen Tipp über eine Affäre des damaligen Innenministers Charles Clarke zu bestätigen .
Staatsanwalt Andrew Edis QC erklärte dem Gericht im Old Bailey , News of the World habe im Mai 2005 ein falsches Gerücht dahingehend gehört , dass Clarke ein Verhältnis mit seiner „ attraktiven Sonderberaterin “ Hannah Pawlby hätte .
Die Zeitung beauftragte den Privatdetektiv Glenn Mulcaire damit , Pawlbys Voicemails zu hacken , und verfolgte sie , aber Coulson rief sie auch an und hinterließ Nachrichten , wie das Gericht erfuhr .
„ Nach Auffassung der Staatsanwaltschaft ist Coulson , der jetzt Herausgeber der NotW ist , niemand , der vor der Wohnung von Leuten steht und hofft , sie auf frischer Tat zu ertappen , sondern einer , der Leute gern mit einer Geschichte konfrontiert , um ihre Reaktion zu sehen “ , erklärte Edis .
Er sagte , NotW verwende drei Verfahren , um Geschichten investigativ zu recherchieren : Telefon @-@ Hacking , Überwachung und Konfrontation .
Der Herausgeber ist persönlich an der dritten Methode beteiligt .
Offensichtlich weiß er von der zweiten , der Überwachung , anders kann es nicht sein .
Wie sieht es mit der ersten aus ?
Weiß er über das Telefon @-@ Hacking Bescheid ?
Er streitet das ab , aber wir sagen : „ Und ob er davon wusste . “
Gerüchte über eine Affäre Clarkes wurden zuerst von der Feature @-@ Redaktion von NotW aufgegriffen , als einer Quelle , die sexuell an Pawlby interessiert war , gesagt wurde : „ Verschwenden Sie nicht Ihre Zeit , sie ist mit Charles zusammen . “
Ein Band mit Voicemails von ihrem Telefon von mindestens drei Anlässen wurde im August 2006 in Mulcaires Wohnung sichergestellt .
Die Ermittler fanden außerdem Einträge auf dem Computer des Detektivs , auf dem Pawlby und ihre Schwester als „ Projekte “ gespeichert waren .
In der Zeit , als die Recherchen liefen , erhielten die Großeltern von Pawlby anonyme Anrufe , in denen sie nach Informationen über sie gefragt wurden , erklärte Edis .
Unterdessen beaufsichtigten der ehemalige Chefreporter Neville Thurlbeck und der frühere Reporter James Weatherup die Überwachung der Bewegungen von Pawlby .
Am 18. Juni 2005 hinterließ Coulson ihr eine Voicemail mit folgendem Inhalt : „ Ich habe eine Story , die wir morgen herausbringen wollen , über die ich gern mit Charles sprechen möchte . “
Edis erklärte , Coulsons Aktivitäten bei dieser Story folgten demselben Muster wie bei anderen wichtigen Persönlichkeiten , etwa dem früheren Innenminister David Blunkett .
Die Geschworenen hörten am Donnerstag , dass Coulson Blunkett wegen einer Affäre mit einer verheirateten Frau konfrontiert habe , als er selbst mit der Mitangeklagten Rebekah Brooks liiert war , die damals verheiratet gewesen war .
Coulson und Brooks streiten ab , sich mit anderen verschworen zu haben , zwischen dem 3. Oktober 2000 und dem 9. August 2006 Telefone zu hacken .
Mulcaire , Thurlbeck und Weatherup haben das Telefon @-@ Hacking zugegeben .
Aus Protest gegen die geplante Reichensteuer wird der französische Fussball tatsächlich den ersten Streik seit 1972 durchziehen .
Ein Schlichtungstreffen geht ergebnislos zu Ende .
Im Konflikt um die Reichensteuer haben sich die Regierung und der Profi @-@ Fussball in Frankreich nach einem gescheiterten Schlichtungstreffen in eine Sackgasse manövriert .
Präsident François Hollande empfing zwar am Donnerstag im Pariser Élysée @-@ Palast Vereins- und Verbandsvertreter und hörte sich auch deren Klagen an .
Er weigerte sich aber , den Fussball von der geplanten 75 @-@ prozentigen Abgabe auf Einkommen von mehr als einer Million Euro pro Jahr , die alle Firmen des Landes ab 2014 zwei Jahre lang zahlen sollen , zu verschonen .
Auch die Gegenseite blieb hart .
Den für Ende November angekündigten Streik werde man nun auch durchziehen , teilte der Chef Vereinigung der Profiklubs ( UCPF ) , Jean @-@ Pierre Louvel , mit .
Die zwischen dem 29. November und dem 2. Dezember angesetzten Spieltage in der Ligue 1 und Ligue 2 fallen somit aus .
Gechingen : Kein absoluter Schutz möglich
&quot; Wir wollen die Einwohner frühzeitig in die Planung einbinden &quot; , eröffnete Bürgermeister Jens Häußler die Bürgerinformationsveranstaltung zum Hochwasserschutzkonzept in Gechingen .
Rund 80 Teilnehmer waren in die Gemeindehalle gekommen , um sich die geplanten Maßnahmen erklären zu lassen , Fragen zu stellen , Bedenken zu äußern und Ideen einzubringen .
Häußler stellte klar : &quot; Die letztendlichen Entscheidungen fällen die Mitglieder des Gemeinderats &quot; .
Das Hochwasser , das Gechingen am 15. Mai 2009 , unvorbereitet traf , sei ein einschneidendes Ereignis gewesen , das die Frage nach Schutzmaßnahmen für die Zukunft aufwarf , so Häußler .
Eine Flussgebietsuntersuchung war mit der Nachbargemeinde Aidlingen in Auftrag gegeben worden , die nun Grundlage für das Hochwasserschutzkonzept in Gechingen ist .
&quot; Der Schutz möglichst vieler bebauter Grundstücke ist das Ziel &quot; , so Häußler .
Zugrunde gelegt ist der Planung der Schutz vor einem laut Deutschen Wetterdienst statistisch alle 100 Jahre zu erwartenden Hochwasser .
Der Klimaveränderung wird durch einen 15 @-@ prozentigen Zuschlag Rechnung getragen .
In Fachkreisen wird dies mit &quot; HQ 100aKlima &quot; bezeichnet .
Die Wassermassen , die 2009 in Gechingen zu beträchtlichen Schäden geführt hatten , entsprachen einem 1000 @-@ jährigen Hochwasser .
&quot; Einen absoluten Schutz gibt es nicht , aber eine relative Verbesserung können wir erzielen &quot; , so Häußler .
Um den Schutz HQ 100aKlima zu erzielen , müssen in Gechingen rund vier Millionen Euro investiert werden , wobei die Gemeinde mit Landeszuschüssen in Höhe von rund 70 Prozent rechnen kann .
Häußler wies aber darauf hin , dass es die Förderung nur gebe , wenn ein Gesamtkonzept umgesetzt werde .
Dazu sei die Gemeinde auf die Mitwirkung der Bürger angewiesen .
Ein aufwändiges Planungs- und Genehmigungsverfahren müsse absolviert werden .
Im besten Fall könne 2016 mit der Umsetzung begonnen werden .
Unter anderem sieht das Schutzkonzept , das bereits in der vergangenen Woche im Gemeinderat präsentiert wurde ( wir berichteten ) lokale Maßnahmen im Zufluss des Flüsschens Irm aus dem Stammheimer Tal vor .
Im Anschluss an die Präsentation des Hochwasserschutzkonzepts nutzten die Teilnehmer die Gelegenheit , ihre Anliegen einzubringen .
Unter anderem wurde in Frage gestellt , warum nicht mehr Dämme und Rückhaltebecken zum Schutz des Ortes geplant seien .
Gregor Kühn , Fachplaner des beauftragten Ingenieurbüros Wald und Corbe aus Hügelsheim , der das Konzept vorstellte , betonte , dass es das Zusammenspiel aller vorgestellten Maßnahmen benötige , um in der Summe das gewünschte Ziel zu erreichen .
Darüber hinaus sei man gehalten die wirtschaftlichste Lösung zu finden , so Joachim Wald von Wald und Corbe .
Unmut herrschte bei Anliegern des Altorts , die selbst bei normalen Gewitterregen immer wieder unter einer Überlastung des Kanalnetzes zu leiden haben .
Das Problem ist bei der Verwaltung bekannt und erste Maßnahmen wurden bereits ergriffen .
Häußler wies jedoch darauf hin , dass die Richtlinien für Kanalsysteme andere seien , als für den Hochwasserschutz und dies nicht vermischt werden dürfe .
Die Gemeinde sei verpflichtet , das Kanalnetz so auszulegen , dass zwei- bis dreijährige Regenereignisse verkraftet werden könnten .
Die Abwasserkanäle größer zu dimensionieren , würde Millionen verschlingen .
Schwerverletzte nach Zusammenstoß
Am frühen Freitagnachmittag sind auf der Landesstraße 44 nahe Revensdorf zwei Autofahrer bei einem Frontalzusammenstoß schwer verletzt worden .
Die Polizei sperrte die Straße sofort komplett , konnte aber zum Unfallhergang zunächst wenig sagen .
Allerdings gebe es verschiedene Zeugenaussagen , die erst ausgewertet werden sollten .
Fest steht , dass die 19 Jahre alte Lenkerin eines VW Golf in Richtung Revensdorf fuhr und der 38 @-@ jährige Mann aus Gettorf ihr mit seinem Hyundai entgegen kam .
Beide Fahrzeuge prallten zusammen , wobei die Frau so schwer eingeklemmt war , dass die Feuerwehr knapp eine halbe Stunde benötigte , um sie aus dem Fahrzeugwrack zu befreien .
Die eigentliche Unfallursache blieb zunächst ungeklärt .
Beide Verunglückten kamen in nahe gelegene Krankenhäuser .
Die Strecke blieb etwa zwei Stunden voll gesperrt .
Man könnte ihn den Dostojewski der USA nennen .
Philip K. Dick war ein Gottsucher , ein Metaphysiker , seine Romane und Erzählungen haben auch etwas Serielles .
Verblüffend die Verwandtschaft im Äußeren : die stechenden Augen , der Bart , die hohe Stirn .
Und so , wie Fjodor M. Dostojewski mit seinem massiven Oeuvre als Ergründer und Apologet der russischen Seele zu verstehen ist , liest man Philip K. Dick als amerikanischen Propheten , der im eigenen Land durchaus etwas gilt .
Einige Titel sind im Heyne Verlag erschienen , die Haffmans @-@ Kassette mit den 118 Erzählungen vertreibt Zweitausendeins .
Dick erklärt Amerika - das Reich des atemberaubenden technischen Fortschritts , gepaart mit Paranoia , Sicherheitswahn und dem Glauben , auserwählt zu sein .
Dick hatte Gotteserlebnisse , seine späten Bücher lesen sich wie eine Mischung aus der Offenbarung des Johannes und einem Computer @-@ Manual .
Vielleicht war er verrückt , hatten Drogen seinem Hirn zugesetzt .
Er hat kapiert , früh schon , dass die Rechner Divinitäten sind .
Er schrieb eine Theologie des Computers und fragte , was einen Menschen von einer Maschine unterscheidet , den Schöpfer von seinem Geschöpf .
Das ist das &quot; Blade Runner &quot; -Problem .
Das Töten .
Ein Meister der Science Fiction .
Ein fantastischer Schriftsteller .
Seine Storys haben Filmregisseure wie Ridley Scott , Paul Verhoeven und Steven Spielberg inspiriert .
Diese Geschichte ist jetzt besonders signifikant .
Der &quot; Minderheiten @-@ Report &quot; stammt aus dem Jahr 1956 , er verströmt den Geruch des Kalten Kriegs und der McCarthy @-@ Tribunale .
Es wird hier das Prinzip des &quot; Prä @-@ Verbrechens &quot; entwickelt , &quot; Pre @-@ Crime &quot; , also das , was inzwischen mehr oder weniger offizielle Doktrin des Weißen Hauses ist .
In Dicks Welt , die der unseren erschreckend gleicht , schauen Mutanten in die Zukunft - und die Polizei greift zu .
&quot; Wir erfassen Individuen , die gegen keinerlei Gesetz verstoßen haben &quot; , sagt der Chef der Behörde .
&quot; Wir schnappen sie uns , noch bevor sie ein Gewaltverbrechen begehen können &quot; .
Und : &quot; In unserer Gesellschaft gibt es keine Schwerverbrecher , dafür haben wir ein Straflager voller Pesudoverbrecher &quot; . Sie lesen Zeitströme .
Sie nehmen an , dass Schlimmes geschieht , und verhindern , dass der kriminelle Gedanke in die Tat umgesetzt wird .
Dicks Erzählung wirkt wie die Blaupause für die Anti @-@ Terror @-@ Gesetze und den Abhörrausch der NSA .
Antizipation des Anschlags : So funktioniert auch Obamas Drohnen @-@ Philosophie und -Praxis .
Aber Dicks Story ist noch nicht zu Ende .
Der Polizeichef beklagt , dass es keine Gewaltenteilung mehr gebe , das Militär kontrolliert den Alltag - und was vom Staat übrig ist .
Dann wird der Überwacher selbst überwacht und eines zukünftigen Verbrechens überführt .
Das System dreht durch .
Es ist perfekt , aber es lügt .
Es erfindet seine eigenen Voraussetzungen .
Nimmt Irrtümer und Opfer nicht nur in Kauf , sondern baut sich darauf auf .
Das System schafft die Gefahr , die es bekämpft .
Philip K. Dick lesen heißt , immer wieder , der Wahrheit näher zu kommen .
Spähaffäre um Merkel in Russland aussagen
Der frühere US @-@ Geheimdienstexperte Edward Snowden könnte in der US @-@ Spähaffäre um Bundeskanzlerin Angela Merkel auch in seinem russischen Asyl Aussagen machen .
Vertreter der deutschen Bundesanwaltschaft könnten entweder schriftlich Fragen stellen oder den 30 @-@ Jährigen auch persönlich in Russland treffen , meldete die Agentur Interfax .
Zuvor hatte der Grünen @-@ Bundestagsabgeordnete Hans @-@ Christian Ströbele gestern als erster deutscher Politiker Snowden in Moskau getroffen , um mit ihm über die Affäre zu sprechen .
NSA @-@ Enthüllungen verstärken Firmenparanoia wegen staatlicher Überwachung
An einem milden Tag Ende August flog ein deutscher Polizeihubschrauber tief über das US @-@ Konsulat in Frankfurt am Main , der Finanzhauptstadt Deutschlands .
Auf Anweisung des Bundesamtes für Verfassungsschutz und Terrorismusbekämpfung ( BVT ) , des deutschen Innengeheimdienstes , sollte er das Dach des US @-@ Außenpostens fotografieren , der sich weniger als 5 km von der Europäischen Zentralbank und der Bundesbank befindet .
Laut deutschen Medien wollte das BVT das Vorhandensein von Überwachungsantennen nachweisen und die Aktion führte zu einem Wortwechsel zwischen den USA und dem deutschen Außenministerium in Berlin .
James Clapper , US @-@ amerikanischer Director of National Intelligence , bestand im September erneut darauf , dass die USA keine Möglichkeiten der Auslandsspionage einsetzten , „ um die Betriebsgeheimnisse ausländischer Unternehmen im Auftrag US @-@ amerikanischer Firmen zu stehlen , damit diese ihre internationale Wettbewerbsfähigkeit oder ihren Gewinn ausbauen könnten . “
Doch seit Edward Snowden , der zum Whistleblower gewordene einstige Mitarbeiter , mit der Veröffentlichung seines Füllhorns an US @-@ amerikanischen Überwachungsgeheimnissen begonnen hat , sind sich europäische Regierungen und Unternehmenschefs nicht mehr sicher , ob sie den Direktor beim Wort nehmen können .
Berichte , wonach die amerikanische National Security Agency die brasilianische Ölfirma Petrobas ausspioniert und sich Daten amerikanischer Cloud @-@ Anbieter einschließlich Google und Yahoo beschafft hat , haben die Firmenparanoia wegen staatlicher Überwachung auf einen neuen Höchststand gebracht .
Das Fass zum Überlaufen brachte die Enthüllung , dass Kanzlerin Angela Merkels Telefon verwanzt war , möglicherweise schon seit zehn Jahren .
Wenn die mächtigste Person in Europa ins Visier geraten kann , dann sind mit Sicherheit auch Unternehmensleitungen potenzielle Ziele .
Snowden hat die intensive Zusammenarbeit zwischen US @-@ Geheimdiensten und Unternehmen transparent gemacht .
Ich glaube , es ist denkbar , dass diese Daten zum gegenseitigen Nutzen verwendet werden .
„ Deutschland muss aufwachen “ , erklärt Oliver Grün , Präsident des BITMi , der kleine und mittlere IT @-@ Firmen in Deutschland vertritt .
Deutsche Unternehmen glauben , die USA stellten nun ein beinahe ebenso großes Risiko dar wie China , wenn es um Industriespionage und Datendiebstahl gehe , so eine Umfrage , die im Juli von der Beraterfirma EY veröffentlicht wurde .
In den von Snowden durchgesickerten Dokumenten gab es allerdings bisher keinen Beleg , dass die USA die Betriebsgeheimnisse ausländischer Unternehmen an eigene Firmen weitergegeben haben .
Politiker haben ihre Sorge darüber zum Ausdruck gebracht , dass der EU bestimmte IT- und Internet @-@ Möglichkeiten fehlten und sie ihre Abhängigkeit von den USA reduzieren sollte .
Die Unternehmen sind diesbezüglich skeptisch .
Im Bundestag wurde vorgeschlagen , wir sollten ein deutsches Google aufbauen .
Ich kann nur meine Augen schließen und sie langsam wieder öffnen ...
„ So funktioniert das nicht “ , sagt Hasso Plattner , Vorsitzender des deutschen Softwareherstellers SAP .
Wenn man eine starke europäische IT @-@ Industrie gewollt hätte , dann hätte man sie nicht vor 20 Jahren aussterben lassen sollen .
Alles in Deutschland wird subventioniert , von der Kohle über Autos bis zur Landwirtschaft .
Alles , bis auf die IT @-@ Branche .
Dennoch haben Reichweite und technische Raffinesse der von den Snowden @-@ Enthüllungen aufgedeckten US @-@ Spionagebehörden Firmen schockiert , die vorher das größte Spionagerisiko in China gesehen hatten .
Beim Cloud Computing findet eine große Veränderung statt , weil europäische Unternehmensleiter sich nun bewusster sind , dass in den USA gespeicherte Daten der dortigen Rechtsprechung unterliegen und deshalb potenziell gefährdet sind .
Laut einer von der Cloud Security Alliance , einer Handelsinstitution , durchgeführten Umfrage verwarfen nach den Enthüllungen über die US @-@ amerikanischen Data @-@ Mining @-@ Aktivitäten mit Prism etwa zehn Prozent der nicht in den USA ansässigen Mitglieder Pläne , einen amerikanischen Anbieter zu nutzen .
Jim Snabe , stellvertretender Geschäftsführer von SAP , sagt : „ Wir sehen eine neue Frage von Kunden , die es vor einem Jahr noch nicht gab – sie lautet : Wo werden meine Daten gespeichert und können Sie garantieren , dass diese physisch in diesem Rechtsraum bleiben ? “
Viele deutsche Unternehmensleiter vertreten die Ansicht , die jüngsten Berichte bestätigen einfach nur , was sie sowieso schon wussten , nämlich dass mächtige Staaten ihre wertvollsten Geheimnisse stehlen wollen und diese deshalb um jeden Preis bewacht werden müssen .
Dass Wirtschaftsspionage stattfindet , ist keine Überraschung .
Das war schon immer so .
„ Es war viele Jahre lang ein Thema und hat sich durch die aktuelle Diskussion nicht fundamental geändert “ , sagt Kurt Bock , Vorsitzender des Chemieunternehmens BASF .
Die Amerikaner spionieren uns auf kommerzieller und industrieller Ebene aus , so wie wir das auch machen , denn es ist im nationalen Interesse , unsere Unternehmen zu verteidigen .
Die Unternehmensführung prahlt normalerweise nicht über die Gegenmaßnahmen , die man ergriffen hat , denn das verschafft Angreifern Vorteile .
In großen Unternehmen wird Mitarbeitern schon lange eingebläut , dass das Mitnehmen eines kostenlosen USB @-@ Sticks auf einer Messe oder das unbewachte Liegenlassen eines Laptops im Hotelzimmer nicht ratsam sei , gelinde gesagt .
Ulrich Hackenberk , Vorstandsmitglied bei Autohersteller Audi , sagt , dass es seit Jahren zur Standardpraxis gehöre , vor einem Vorstandstreffen die Handys einzusammeln , damit sie nicht als Abhörgeräte verwendet werden können .
Das deutsche BVT rät Führungskräften , einfache Prepaid @-@ Handys zu verwenden , wenn sie auf Auslandsreisen gehen , weil Smartphones möglicherweise kompromittiert sein können .
Die Prepaid @-@ Handys werden hinterher weggeworfen .
Es besteht allerdings die Sorge , dass kleine und mittlere Unternehmen angreifbar gegenüber Hacking und Überwachung bleiben .
In Deutschland sind viele dieser Unternehmen weltweite Marktführer in der jeweiligen Nische .
„ Kleinen und mittleren Unternehmen fehlen oft die Erfahrung , das Personal und die finanziellen Ressourcen , um Betriebsgeheimnisse effektiv gegen nicht autorisierten Zugriff zu schützen “ , warnt das BVT in einem Bericht .
Die USA warnen eigene Firmen vor Wirtschaftsspionage durch andere Länder .
Laut Washington Post wurden im US National Intelligence Estimate im Februar Frankreich , Russland und Israel hinter China auf Rang zwei der Länder eingeordnet , die sich zur Beschaffung von Wirtschaftsdaten des Hackings bedienten .
Ein Vorstandsmitglied eines deutschen Blue @-@ Chip @-@ Unternehmens stimmte zu , wenn es um Wirtschaftsspionage gehe , dann „ sind die Franzosen die Schlimmsten “ .
Bernard Squarcini , ehemaliger Leiter des französischen Innengeheimdienstes DCRL , wurde diesen Monat in einem Interview mit folgenden Worten zitiert : „ Die Geheimdienste wissen sehr genau , dass alle Länder , selbst wenn sie im Kampf gegen den Terror zusammenarbeiten , ihre Verbündeten ausspionieren . “
Hechingen : Messe gibt Antwort auf Hochzeits @-@ Fragen
&quot; Die Ehe ist die wichtigste Entdeckungsreise , die der Mensch unternehmen kann &quot; , sagte der Philosoph Sören Kierkegaard .
Tipps , wie zumindest die Hochzeitsfeier gelingt , gab nun eine Spezialmesse in der Domäne in Hechingen .
Vertreten waren wichtige Anbieter rund um eine Hochzeit .
Ein Trend : Der Retro @-@ Look hat wieder Einzug gehalten .
Das beginnt etwa bei den Hochzeitskleidern .
Weiß ist Muss , am besten gedeckt oder in Creme .
Vorne sind die vielfach gerüschten und mit Stickereien versehenen Kleider geschlossen , oft mit einem Schleier , hinten hingegen gehen sie den Rücken hinab und enden oft in einer Schleppe .
Da allerdings scheiden sich die Geister , wie Stefanie Koch vom Modehaus Kleidermüller betont .
Bei Herren dominiert der Anzug mit Weste und Plastron , aber es können auch cremefarbige oder braune Kombinationen gewählt werden .
Wichtig sei die Auswahl des Lokals , wurde erklärt .
Schmucklose Nebenzimmer sind nicht optimal , das Ambiente sollte besonders sein .
Hier machte die Domäne auf ihr eigenes Angebot in der Remise aufmerksam .
Wer dann mit der Kutsche vorfahren will , für den hat Uwe Link ein Angebot .
&quot; Kutschen sind aber auch für Jungesellinnenabschiede beliebt &quot; , meint er .
Romantik ist auch für Einladungskarten , Blumenarrangements und auch für Hochzeitsbilder gefragt .
Immer mehr in Mode komme das &quot; After @-@ Wedding @-@ Foto &quot; - also Aufnahmeserien an besonderen Orten , vorzugsweise etwa Wasserfälle , einige Tage nach dem Fest , aber in Hochzeitskleidung , erklärte Elisabeth Keidel .
Viele weitere Details einer gelungenen Hochzeit wurden am Sonntag in der Domäne präsentiert .
Blumenarrangement , Ringe , Hochzeitstafel , Kuchen und auch ein Zauberer , wie etwa Marko Ripperger , der Gäste stilvoll unterhalten kann .
Nicht zu vergessen die richtige Kosmetik und Nagelpflege .
Alles für ein unvergessliches Fest .
Hundefreunde erfolgreich
Zum wiederholten Mal waren die Sportler der Hundefreunde Bitz erfolgreich auf einem Rally @-@ Obedience @-@ Turnier .
Achim Scherrenbacher startete in Kandel mit zwei Hunden ; mit seiner Hündin Sandy erzielte er in der Klasse Beginner 94 Punkte und sicherte sich den fünften Platz , und mit dem 15 Monate alten Marley brachte er es mit 87 Punkten auf Platz zwölf .
Susi Höpp stellte sich mit ihrem Woody in der Klasse 1 den kritischen Blicken des Leistungsrichters .
Eltern eines Teenagers aus Georgia , der bei tragischem Unfall starb , glauben an Mord
Die Eltern des Teenagers , dessen Leiche in einer zusammengerollten Ringermatte in der Turnhalle seiner High School gefunden wurde , sind überzeugt , dass ihr Sohn ermordet wurde , erklärte der Anwalt der Familie am Donnerstag .
Kendrick Johnson aus Valdosta im US @-@ amerikanischen Bundesstaat Georgia wurde am 11. Januar in einer aufrecht aufgestellten Matte gefunden , die hinter der Tribüne in der Schulturnhalle stand .
Die Untersuchungsbeamten des Sheriffs von Lowndes County kamen zu dem Schluss , dass Johnson bei einem tragischen Unfall starb , was die Familie des 17 @-@ Jährigen jedoch anzweifelt .
„ Sie sind davon überzeugt , dass ihr Sohn ermordet wurde “ , erklärte Benjamin Crump , der Anwalt von Kenneth und Jacquelyn Johnson , gegenüber FoxNews.com .
Sie hätten nie geglaubt , er sei so gestorben , wie es der Sheriff geschlussfolgert habe .
„ Sie sind der Ansicht , dass es jeder Logik entbehre , gegen die Gesetze der Physik wie auch gegen den gesunden Menschenverstand verstoße “ , so Crump .
Vielmehr seien sie überzeugt , die Wahrheit werde vertuscht , um die Person oder Personen zu schützen , die für den Tod ihres Sohnes verantwortlich seien .
„ Ihr Sohn ging zum Lernen in die Schule und kam im Leichensack zurück “ , kommentiert er .
US @-@ Staatsanwalt Michael Moore sagte am Donnerstag , es werde eine formelle Ermittlung zum Tod Johnsons geben , da eine Reihe wichtiger Fragen noch ungeklärt seien .
Was war die Todesursache ?
Ist sein Tod auf ein Verbrechen zurückzuführen ?
Das erklärte Moore bei einer Pressekonferenz am Donnerstagnachmittag .
Ich folge den Fakten , in welche Richtung sie auch führen .
Mein Ziel ist es , die Wahrheit herauszufinden .
„ Ich vertrete die Auffassung , dass eine hinreichende Grundlage für eine formelle Ermittlung besteht “ , sagte er .
Moore erklärte gegenüber Reportern , die anfängliche Autopsie deute darauf hin , dass Johnson an den Folgen einer „ positionsbedingten Erstickung “ verstorben sei .
Eine zweite Autopsie habe allerdings eine andere Todesursache ergeben , so Moore .
„ Es gibt eine Reihe von Fragen , die beantwortet oder bestätigt werden müssen “ , sagte er .
Moore fügte hinzu , falls es ausreichende Beweise für eine strafrechtliche oder zivilrechtliche Untersuchung zum Tode Johnsons gebe , werde er das FBI mit der Durchführung der Ermittlungen beauftragen .
Ein Vertreter der Behörde des County Sheriffs war auf unsere Anfrage am Donnerstag hin nicht sofort zu einem Kommentar bereit .
Ein Gericht im Süden Georgias ordnete am Mittwoch an , dass die Behörden alle Überwachungsvideos freigeben müssen , die die Ermittler überprüft haben .
Die Eltern des Teenagers sagten , sie hofften , dass die Videoaufzeichnungen Hinweise darauf enthielten , wie er gestorben sei .
CDC veröffentlichen Allergierichtlinien für Schulen
Am Mittwoch veröffentlichten die Centers for Disease Control and Prevention ( CDC ) eine Reihe von Richtlinien für den Umgang mit Lebensmittelallergien von Kindern an Schulen .
Dies sind die ersten derartigen Richtlinien , die die US @-@ amerikanische Regierung herausgegeben hat , da die Anzahl der schulpflichtigen Kinder mit Lebensmittelallergien steigt .
Eines von 20 Kindern in den Vereinigten Staaten hat inzwischen eine Lebensmittelallergie .
Die Verbreitung von Lebensmittelallergien unter Kindern hat laut CDC zwischen 1997 und 2007 um 18 Prozent zugenommen .
Die Leitlinien enthalten Informationen für Schulen , die beim Lehrkörper und den Mitarbeitern ein Bewusstsein für Lebensmittelallergien wecken sollen und wie mit Kindern umgegangen werden soll , die allergische Reaktionen zeigen .
Es wird auch empfohlen , dass Schulen Epinephrin vorrätig haben – die Auto @-@ Injektion der Marke EpiPen wird am häufigsten verwendet – , um einer potentiell tödlichen Überempfindlichkeitsreaktion begegnen zu können .
Die Gesetzgeber in den Bundesstaaten haben kürzlich die Vorschriften geändert , damit Schulen Epinephrin einfacher vorrätig halten können .
Im Bericht ist auch eine Liste typischer Symptome enthalten , die von Kindern genannt werden , die eine allergische Reaktion aufweisen .
Kinder sagen vielleicht : „ Es fühlt sich an , als ob etwas auf meine Zunge drückt “ , „ Meine Zunge fühlt sich an , als ob ein Haar darauf liegt “ oder „ Meine Zunge kribbelt “ .
Eltern von intersexuellen Kindern können „ Geschlecht unbestimmt “ wählen
Deutschland ist die erste europäische Nation , in der ein drittes Geschlecht für Kinder anerkannt ist , die mit nicht eindeutigen Genitalien geboren wurden .
Neugeborenen wird nicht mehr starr männlich oder weiblich zugewiesen .
Nach dem neuen Gesetz müssen Eltern kein Geschlecht mehr für solche Kinder erklären , sondern können „ unbestimmt “ oder „ nicht festgelegt “ auf der Geburtsurkunde angeben .
Ziel des Gesetzes ist es , den Druck von Eltern zu nehmen , damit sie keine übereilten Entscheidungen in Bezug auf Operationen für eine Geschlechtszuweisung bei Neugeborenen treffen müssen , und die Diskriminierung von intersexuellen Menschen zu bekämpfen .
Eine intersexuelle Person sagte laut BBC Jahre später : „ Ich bin weder Mann noch Frau . “
Ich bleibe das Flickwerk , das von Ärzten erschaffen wurde , verstümmelt und voller Narben .
Schätzungsweise kommt eines von 2.000 Kindern jedes Jahr weder als Junge noch als Mädchen zur Welt .
Sie gehören zu den Intersexuellen , einer Gruppe , die unter die Diagnose „ Sexualdifferenzierungsstörung “ ( DSD ) fallen , ein Sammelbegriff für Menschen mit atypischen Chromosomen , Keimdrüsen ( Eierstöcken oder Hoden ) oder ungewöhnlich entwickelten Genitalien .
Wallis Simpson war möglicherweise intersexuell .
Das Verständnis der Geschlechteridentifikation ist noch immer nicht sehr gut entwickelt , doch raten die meisten Experten in den USA dazu , man solle die besten verfügbaren Informationen zur Geschlechtszuweisung verwenden , falls eine Bestimmung nicht möglich sei , und nicht auf die psychologische und körperliche Entwicklung des Kindes warten , ehe man sich – wenn überhaupt – für eine Operation entscheide .
Der New Yorker Psychiater Dr. Jack Drescher , der sich auf die Problematik der Geschlechteridentifikation spezialisiert hat , sagte , das neue deutsche Gesetz „ klinge nach einer guten Sache “ .
Intersexuelle Kinder stellen ein ethisches Dilemma dar .
„ Manche Menschen haben lebensbedrohliche Erkrankungen , die einen chirurgischen Eingriff erforderlich machen , doch für die meisten Kinder gilt das nicht “ , sagte er .
Man könne eine Geschlechtszuweisung ohne Operation vornehmen und dann abwarten , wie sich die Identität entwickle .
Die wissenschaftlichen Daten darüber , wie ein Kind überhaupt seine geschlechtliche Identität entwickelt , sind nicht sehr genau .
Niemand weiß , warum es geschieht .
Es ist wie das Geheimnis , weshalb Menschen homosexuell sind .
In einem Bericht an die Europäische Kommission aus dem Jahr 2011 heißt es , intersexuelle Menschen seien von transsexuellen oder Transgender @-@ Personen zu unterscheiden , denn ihr Status sei nicht geschlechtsbezogen , sondern durch ihre biologische Konstitution bedingt , die weder ausschließlich männlich noch weiblich ist , sondern typischerweise beides gleichzeitig oder nicht klar als eines davon definiert .
Diese Eigenschaften zeigten sich in nachrangigen sexuellen Charakteristiken wie Muskelmasse , Behaarung , Brüste und Statur , vorrangigen sexuellen Charakteristiken wie Fortpflanzungsorgane und Genitalien oder in Chromosomstrukturen und Hormonen .
Der Bericht gibt auch einen Überblick über die Diskriminierung , der sich intersexuelle und Transgender @-@ Personen im Berufsleben ausgesetzt sehen sowie über das Ausmaß von Belästigung , Gewalt und Vorurteilskriminalität .
Nicht mit dem Geschlechterbild übereinstimmende Jungen haben jetzt ein spezielles Camp .
Inzwischen ist es in Australien und Nepal für Erwachsene möglich , auf offiziellen Dokumenten männlich , weiblich oder „ drittes Geschlecht “ anzugeben .
Im Juni wurde Australier Norrie May @-@ Welby ( 52 ) als weltweit erste „ geschlechtslose “ Person anerkannt , nachdem ein Gericht die lebenslange Beibehaltung eines „ nicht festgelegten “ Geschlechtsstatus zugestanden hatte .
Deutsche Ausweise haben neben M und W künftig eine dritte Zuweisung , X für intersexuell , so das Innenministerium .
Im benachbarten Frankreich sind Geschlechtsthemen immer noch kontrovers , so eine Nachrichtenmeldung auf France 24 .
2011 unterzeichneten Dutzende französische Abgeordnete des streng katholischen Landes eine Petition , dass die „ Geschlechtertheorie “ aus Schulbüchern entfernt werden solle .
Die US @-@ amerikanische Website Catholic Online hat sich ebenfalls gegen das deutsche Gesetz ausgesprochen , mit der Begründung : „ Wenn die Welt in einen neuen Zustand gezerrt wird , wo das Geschlecht eine Entscheidung darstellt , sexuelle Aktivität aber nicht , dann verdrehen wir zwei weitere Säulen der Zivilisation . “
Die Mutter eines Neugeborenen aus Maryland erklärte gegenüber Baby Zone , sie fände es besser , wenn Babys bei der Geburt ein Geschlecht zugewiesen werde .
„ Das Elterndasein ist auch ohne weitere Einschränkungen schon stressig genug , besonders wenn man das Geschlecht des eigenen Kindes nicht kennt “ , sagte sie der Elternwebsite .
Kinder brauchen Stabilität und Sicherheit .
Historisch gesehen wurden Kindern , die sowohl mit männlichen als auch weiblichen Geschlechtsteilen geboren wurden , als Hermaphroditen bezeichnet , nach dem attraktiven griechischen Gott , der beide Geschlechter hatte .
Noch vor zehn Jahren betrachtete die Medizin das Geschlecht als etwas , das man auslöschen und dann neu aufbauen könne .
Doch inzwischen werden die ethischen Grundlagen einer Operation angezweifelt , nachdem nun bekannt ist , wie komplex die geschlechtliche Identität ist , und dass Ärzte auch falsch liegen können , weil sie nicht wissen , wie sich das Kind beim Aufwachsen mit dem von ihnen zugewiesenen Geschlecht fühlt .
„ Mitte des 20. Jahrhunderts nannte man das einen , psychiatrischen Notfall ‘ “ , sagte Drescher .
Wenn ein solches Kind geboren wurde , dann rief man nicht den Psychiater , sondern den Chirurgen .
Die herrschende Theorie über die Behandlung von Kindern mit nicht eindeutigen Genitalien geht auf Dr. John Money von der Johns Hopkins University zurück , der die Ansicht vertrat , das Geschlecht sei formbar .
Er prägte den Begriff „ geschlechtliche Identität “ und argumentierte , soziale und umweltbedingte Anstöße – wie die Eltern ein Kind erziehen – interagierten mit den Genen und Hormonen eines Kindes und prägten so , ob sich eine Person als männlich oder weiblich betrachte .
Doch in einem unter dem Titel „ John / Joan “ bekannt gewordenen Fall aus dem Jahr 1966 wurden seine Theorien kontrovers .
Er riet den Eltern eines Jungen , dessen Penis bei einer verpfuschten Beschneidung abgetrennt worden war , das Kind ganz zu kastrieren und auch seine Hoden zu entfernen und ihn dann als Mädchen großzuziehen .
„ Money präsentierte diesen Fall als erfolgreiches Beispiel für eine Umwandlung , was er aber nicht war “ , so Drescher .
Als der Junge etwa 15 war , wechselte er zurück zum männlichen Geschlecht und heiratete eine Frau .
Mit 38 aber beging er Selbstmord .
Laut Drescher gibt es noch immer Ärzte , die dieses Modell praktizieren würden .
Doch in den 1990er Jahren , mit dem Einzug des Internet , sind Überlebende dieser Geschlechtsoperationen an die Öffentlichkeit getreten , die „ nicht glücklich mit dem Ergebnis “ sind .
So etwa bei Jim Bruce , einem 36 Jahre alten Autor aus Montana , der mit XY @-@ männlichen Chromosomen geboren wurde , aber zweideutigen Genitalien .
Die Ärzte waren sich nicht klar darüber , ob er eine große Klitoris oder einen kleinen Penis hatte und waren überzeugt , er könne niemals ein „ befriedigendes Leben “ als Mann führen .
Also wurden sein externes Organ und die Hoden kurz nach der Geburt 1976 chirurgisch entfernt und er wurde als Mädchen großgezogen .
Im Alter von 12 erhielt er weibliche Hormone .
„ Ich wusste , dass ich kein Mädchen bin “ , erklärte er gegenüber ABCNews.com
Ich war unglücklich , aber es war wirklich schwer , Fragen zu stellen .
Im Alter von 18 sollte er eine Vaginalplastik erhalten .
Doch da er depressiv war und wusste , dass etwas nicht stimmte , verlangte er seine medizinischen Akten .
Was er herausfand , war schockierend .
Ich wurde bei meiner Geburt sterilisiert – und keiner hat mir das jemals gesagt .
Bruce wurde mit einer DSD geboren , durch die sein Körper nicht genug Testosteron zur Entwicklung der Genitalien produzieren konnte .
Nachdem er die Wahrheit erfahren hatte , wechselte er wieder zur männlichen Identität , erhielt Testosteron @-@ Injektionen und ließ sich seine Brüste entfernen .
Durch die Operation ist er unfruchtbar geworden .
Heute kämpft er für andere in einer Organisation namens Interface Project dafür , dass intersexuelle Menschen als normal wahrgenommen werden .
Doch Anne Tamar @-@ Mattis , Geschäftsführerin der in Kalifornien ansässigen Rechtsgruppe Advocates for Informed Choice , sorgt sich , dass das deutsche Gesetz „ zum Abstempeln und Stigmatisieren ermutigen “ könne .
„ Viele Aktivisten sind besorgt , dass die deutsche Entscheidung Eltern ermutigen könnte , schnelle Entscheidungen zu treffen und dem Kind ein , nicht festgelegt ‘ zuzuweisen “ , erklärte sie .
Wir fürchten , das begünstigt Interventionen .
Wir denken , es wäre besser , das männliche oder weibliche Geschlecht zuzuweisen und dann abzuwarten .
Doch noch wissen wir nicht , wie sich das Gesetz auswirken wird , also können wir nur spekulieren .
Tamar @-@ Mattis sagte , ihre Organisation unterstütze das australische Gesetz , denn „ es ermöglicht Erwachsenen die Anerkennung als drittes Geschlecht “ .
„ Erwachsene sollten in der Lage sein , eigene Entscheidungen über ihr rechtliches Geschlecht zu treffen “ , erklärte sie .
Bei dem deutschen Gesetz geht es um die Zuweisung bei der Geburt .
Das ist kein Kampf , zu dem man kleine Kinder zu diesem Zeitpunkt zwingen sollte .
Wenn sie erwachsen sind , können sie selbst über ihren Körper entscheiden .
Doch Dr. Arlene Baratz , eine Brustradiologin aus Pittsburg , die eine Tochter mit einer sexuellen Differenzierungsstörung hat und Hunderte andere in einer Selbsthilfegruppe unterstützt , sagt , das deutsche Gesetz „ bevollmächtige “ sowohl Eltern als auch Kinder .
Katie , die Tochter von Baratz , wurde mit männlichen Chromosomen geboren , hat aber eine DSD namens komplette Androgenresistenz .
Wegen des Rezeptordefektes der Zielzellen für Testosteron entwickelte Katie weibliche Charakteristiken .
Sie hat eine Vagina , aber keinen Uterus und keine Eierstöcke .
Heute ist Katie 29 und verheiratet ; sie arbeitet an der University of Pennsylvania als Mitarbeiterin in der Kinderpsychiatrie .
Zwar ist sie unfruchtbar , hofft allerdings , durch Adoption oder eine Leihmutter ein Kind bekommen zu können .
„ Das Gesetz gibt Eltern Raum , wodurch sie nicht überstürzt Entscheidungen treffen müssen “ , sagte Baratz .
Es verschafft ihnen die Zeit , verschiedene Tests zu machen und Dinge zu klären und gibt ihnen so Zeit , ehe sie „ männlich “ oder „ weiblich “ schreiben .
Auf diese Weise ist alles in Ordnung – man zieht das Kind groß und liebt es .
Man hat ein wunderbares Baby und genießt das Elternglück .
Und man muss nicht übereilt eine Operation vornehmen , die sich nicht mehr rückgängig machen lässt .
„ Das schließt die Kinder in die Entscheidung mit ein und beseitigt die Angst , die Eltern umtreibt , weil sie der Meinung sind , sie würden nicht das Richtige tun “ , erläuterte sie .
Letztendlich entscheidet das Kind über das Geschlecht , das besser zu ihm passt – und das ist wunderbar .
Dadurch werden Kinder in die Lage versetzt , die Entscheidung selbst zu treffen .
Unbekannte verletzen Mädchen durch Schuss aus Auto
Unbekannte haben bei Schüssen aus einem Auto eine Zwölfjährige in Sachsen @-@ Anhalt verletzt .
Die Täter hatten am Donnerstagabend in Genthin vermutlich mit einer Luftdruckwaffe auf eine Gruppe von Kindern gefeuert .
Das teilte die Polizei in Burg mit .
Das Mädchen sei leicht an der linken Wade verletzt worden .
Rettungskräfte brachten das Mädchen ins Krankenhaus .
Der Schuss kam aus einem Kleinwagen , der an einer Gruppe von sechs Kindern vorbeigefahren war und plötzlich angehalten hatte .
Zeugen sahen zwei Menschen in dem Auto sitzen .
Die Täter schossen außerdem auf eine Bushaltestelle .
Eine Scheibe zerbrach .
Anschließend fuhren sie davon .
Die Kriminalpolizei ermittelt , hieß es am Freitag .
Bis zum jetzigen Zeitpunkt kann die Polizeiinspektion Kempten auf eine ruhige Halloween @-@ Nacht zurückblicken .
Die Beamten wurden lediglich zweimal zu eierwerfenden Kindern gerufen , welche diese gegen Hausfassaden warfen .
Da die Hauseigentümer dies rechtzeitig erkannten und die Eierreste gleich entfernten , dürfte auch kein Sachschaden entstanden sein .
Desweiteren wurden im Stadtgebiet wohl auch einige Sylvesterböller gezündet , aber auch hier ist kein Sachschaden entstanden .
Ein Anwohner im Bischof @-@ Freundorfer @-@ Weg meldete , dass sein Pkw mit Klopapier eingewickelt und seine Radzierblenden entwendet wurden .
Bis zum Eintreffen der Polizei hat der Mann seine Radzierblenden jedoch in unmittelbarer Nähe alle wieder aufgefunden , weswegen die Polizei nicht weiter tätig werden musste .
Wohnen mit Zukunftsperspektive
Eigentlich wohnt Waltraud Ries traumhaft .
Ihr Haus liegt in einer ruhigen Wohngegend von Stuttgart mit viel Grün , einem alten Baumbestand , netten Nachbarn und auch nicht allzu viel Verkehr .
In die Stadt sind es nur wenige Minuten mit öffentlichen Verkehrsmitteln .
&quot; Sie haben hoffentlich keine Angst vor Spinnen ? &quot; , fragt Waltraud Ries und zeigt auf eine fette Spinne am Türrahmen .
Ich suche schon seit einiger Zeit eine neue Wohnung für meinen Mann und mich .
Aber Sie wissen ja , wie schwierig das in Stuttgart ist .
Der Grund ist allerdings keine Spinnenphobie , sondern die Sorge , im Alter die vielen Treppenstufen zum Haus und in der Wohnung nicht mehr bewältigen zu können , erklärt sie .
Zudem : Seit einer Meniskus @-@ Operation hat die Mittfünfzigerin am eigenen Leib erfahren müssen , was es bedeutet , sich mit Handicap von Stockwerk zu Stockwerk zu bewegen .
Vor kurzem erst ist ein Buch von ihr erschienen zum Thema &apos; Glücklich wohnen im Alter - Welche Wohnform ist die beste für mich ? &apos; .
&apos; Unsere Wohnung ist das beste Beispiel dafür , was im Alter gar nicht geht &apos; , beginnt sie zu erzählen .
Als sie vor mehr als 20 Jahren mit ihrem Mann in die Maisonette @-@ Wohnung zog , war es einfach nur eine schöne Wohnung mitten im Grünen .
Heute mit Mitte fünfzig denkt Waltraud Ries anders darüber .
Sie weiß aber auch , dass sie zu den wenigen Menschen gehört , die sich überhaupt mit dem Thema &apos; Wohnen im Alter &apos; auseinandersetzen .
Die meisten verdrängen es , solange es geht .
Alt werden immer nur die anderen &apos; , sagt sie schmunzelnd .
Erst wenn der Leidensdruck wirklich groß ist , mache man sich Gedanken .
&apos; Dann kann es aber auch schon zu spät sein &apos; , so Ries .
In ihrem Buch stellt die Innenarchitektin 17 Wohnmodelle für ein selbstbestimmtes Wohnen im Alter vor .
&apos; Welche Wohnform man aber wählt , ist immer eine Individualentscheidung &apos; , erklärt sie .
D i e Lösung gebe es nicht für das Alter .
Selbst wer sich den Altersruhesitz in der Toskana oder der Bretagne leisten könne , sollte sich immer überlegen , dass er auch krank werden könne .
Und : &apos; Ohne gute Kenntnisse der Landessprache vereinsame man auch im Dolce Vita , &apos; gibt die Fachbuchautorin Aussiedlungswilligen zu bedenken .
Unter ihren Modellen finden sich klassische Betreuungsmodelle , alternative Wohnformen oder die oft zitierte Rentner @-@ WG .
Im Alter hat jeder so seine Ticks und Macken
&apos; Für mich wäre so eine Wohngemeinschaft aber nichts &apos; , meint sie mit einem Augenzwinkern .
Schon gar nicht wie in einer Studenten @-@ WG mit einem gemeinsamen Bad und einer Küche .
&apos; Im Alter braucht man einfach auch seine Rückzugsräume &apos; , so Ries .
Dass eine Senioren @-@ Wohngemeinschaft dennoch funktionieren kann , will die Buchautorin dennoch nicht ausschließen .
Das müsse dann aber anders verlaufen als in der klassischen Studenten @-@ WG .
Und manchmal will man einfach auch nur seine Ruhe &apos; , glaubt sie .
Mit dieser Meinung steht sie zumindest in der Landeshauptstadt nicht allein da .
&apos; Die meisten alten Menschen in Stuttgart wollen so lange es geht in ihrer eigenen Wohnung bleiben &apos; , ist auch die Erfahrung von Theresa Rütten , der Leiterin des Bürgerservices Leben im Alter der Landeshauptstadt .
Ihre Dienststelle berät Menschen rund um das Thema &apos; Älter werden &apos; .
Deshalb würden gerade ältere Menschen häufig auch Unbequemlichkeiten und Einschränkungen in Kauf nehmen , nur um in ihrer gewohnten Umgebung bleiben zu können , das ist auch die Erfahrung der Stiftung Warentest .
Dabei gibt es heute viele Möglichkeiten , das Haus oder die Wohnung barrierefrei zu gestalten .
Ries empfiehlt allen , die sich mit dem altersgerechten Umbau ihres Hauses oder ihrer Wohnung beschäftigen , sich erst einmal gründlich zu informieren und nicht den erstbesten Handwerker zu beauftragen .
Heute gibt es auch für den altersgerechten Umbau Spezialisten .
Selbst in der Mietwohnung lasse sich das eine oder andere realisieren , und wenn es nur die Toilettensitzerhöhung ist , klärt die Innenarchitektin auf .
Aber nicht immer lässt sich die bestehende Wohnung altersgerecht und damit barrierefrei umgestalten , auch wenn sie noch so schön liegt .
Diese Erfahrung musste Waltraud Ries machen .
Zwar könnte man innerhalb der Wohnung einen Treppenlift installieren , der ebenfalls mit Treppen gepflasterte Weg bis an die Wohnungstür wäre aber das weitaus größere Hindernis .
Sie wird weitersuchen , bis sie das ideale Objekt für sich und ihren Mann gefunden hat .
Vor dem Umzug graut es ihr mehr als vor der Spinne an ihrer Wohnungstür .
USA wollen Snowden weiter strafrechtlich verfolgen
Die USA haben ihre Haltung zum früheren US @-@ Geheimdienstmitarbeiter Edward Snowden nicht geändert .
Ihm werde weiterhin vorgeworfen , unerlaubt geheime Informationen weitergegeben zu haben .
Daher müsse er sich in den USA einem Strafverfahren stellen , sagte die Sprecherin des US @-@ Außenministeriums , Jennifer Psaki , in Washington .
Auch die jüngsten Äußerungen von Snowden würden daran nichts ändern .
Zuvor hatte der deutsche Grünen @-@ Politiker Hans @-@ Christian Ströbele nach einem Treffen mit Snowden in Moskau an die USA appelliert , ihn nicht weiter mit Strafe zu bedrohen .
Psaki betonte , dass es sich bei Ströbeles Äußerungen um die eines Parlamentariers handele und nicht um die eines deutschen Regierungsmitglieds .
Geheimdienstenthüller Edward Snowden ist grundsätzlich zu einem Gespräch mit deutschen Behörden bereit .
Zuerst will er jedoch seine Situation geklärt wissen .
Das hat der von den USA gesuchte ehemalige NSA @-@ Mitarbeiter in einem nicht adressierten Schreiben klargemacht , das der Grünen @-@ Politiker Hans @-@ Christian Ströbele am Freitag nach einem Treffen mit Snowden veröffentlichte und an Bundesregierung , Bundestag und Generalbundesanwalt weiterleitete .
Das Schreiben hat nach einer von Ströbele verbreiteten Übersetzung folgenden Wortlaut :
An die Zuständigen
Ich wurde gebeten , Ihnen bezüglich Ihrer Untersuchung zur Massenüberwachung zu schreiben .
Ich heiße Edward Joseph Snowden und war früher vertraglich bzw. über eine Direktanstellung als technischer Experte bei der National Security Agency ( NSA ) , der Central Intelligence Agency ( CIA ) und der Defense Intelligence Agency ( DIA ) der Vereinigten Staaten beschäftigt .
Im Zuge meiner Beschäftigung in diesen Einrichtungen wurde ich Zeuge systematischer Gesetzesverstöße meiner Regierung , die mich aus moralischer Pflicht zum Handeln veranlassten .
Als Ergebnis der Veröffentlichung dieser Bedenken sah ich mich ich einer schwerwiegenden und anhaltenden Hetze ausgesetzt , die mich zwang , meine Familie und meine Heimat zu verlassen .
Ich lebe derzeit im Exil und genieße befristetes Asyl , das mir die Russische Föderation gemäß internationalem Recht gewährt .
Ich bin ermutigt von der Resonanz auf mein politisches Handeln , sowohl in den USA als auch anderswo .
Bürger auf der ganzen Welt und auch hohe Amtsträger - einschließlich der Vereinigten Staaten - haben die Enthüllungen zu einem System der allumfassenden Überwachung , das niemandem Rechenschaft schuldig ist , als einen Dienst an der Öffentlichkeit beurteilt .
Diese Spionage @-@ Enthüllungen zogen viele Vorschläge zu neuen Gesetzen und Richtlinien nach sich , die auf den vormals verdeckten Missbrauch des öffentlichen Vertrauens abzielten .
Der Nutzen für die Gesellschaft aus diesen gewonnenen Erkenntnissen wird zunehmend klarer ; gleichzeitig wurden die in Kauf genommenen Risiken sichtlich vermindert .
Obwohl das Ergebnis meiner Bemühungen nachweislich positiv war , behandelt meine Regierung Dissens nach wie vor als Treuebruch und strebt danach , politische Meinungsäußerung zu kriminalisieren und unter Anklage zu stellen .
Dennoch : Die Wahrheit auszusprechen ist kein Verbrechen .
Ich bin zuversichtlich , dass die Regierung der Vereinigten Staaten mit Unterstützung der internationalen Gemeinschaft diese abträgliche Haltung ablegen wird .
Ich hoffe , dass ich , wenn die Schwierigkeiten dieser humanitären Lage beigelegt sind , in der Lage sein werde , mich an der verantwortungsvollen Aufklärung der Sachverhalte bezüglich der in den Medien getätigten Aussagen , insbesondere im Hinblick auf Wahrheit und Authentizität der Berichte , angemessen und gesetzesgemäß zu beteiligen .
Ich freue mich auf ein Gespräch mit Ihnen in Ihrem Land , sobald die Situation geklärt ist und danke Ihnen für ihre Bemühungen , das internationale Recht zu wahren , das uns alle beschützt .
Edward Snowden bezeugt durch Hans @-@ Christian Ströbele
Kindergarten hat einen privaten Käufer gefunden
&quot; Das Gebäude ist in guten Händen &quot; , sagt Winterlingens Bürgermeister Michael Maier .
Den ehemaligen Kindergarten in der Gartenstraße hat die Kommune an eine Privatperson verkauft .
Dem Verkauf stimmte der Gemeinderat in seiner jüngsten Sitzung im nicht öffentlichen Teil zu .
Das Gebäude wechselte seinen Besitzer zu einem &quot; angemessenen &quot; Preis .
&quot; Die Gemeinde ist zufrieden &quot; , betont Maier .
Im Haushalt waren 100 000 Euro angesetzt .
Noch nicht klar ist , wie der neue Eigentümer den früheren Kindergarten nutzen will .
Dem Bürgermeister ist es Recht , dass Winterlingen die Verantwortung für das Gebäude vor dem Winter an jemand anderen übergeben hat und somit nicht mehr für die Unterhaltung des Hauses aufkommen muss , wie zu heizen , nach dem Garten zu schauen und den Gehweg zu räumen .
&quot; Dieser Aufwand ist nun weg &quot; , freut sich Maier .
Platzkonzert bei hochsommerlichen Temperaturen
Der Musikverein Hammereisenbach gibt ein Platzkonzert auf der Terrasse des Gasthauses Hammer .
Als Dirigentin Bianca Willmann um 19.30 Uhr den Taktstock hebt , zeigt das Thermometer immer noch 25 Grad .
Etwa 50 Zuhörer erfreuen sich an den Klängen der Hammricher Musiker .
Die Vorsitzende Manuela Honeck erläutert die Musikstücke .
Honeck dankte in diesem Rahmen allen , die geholfen hatten , den ersten Musikerhock erfolgreich zu bewältigen .
Bericht : Obama @-@ Kampagne überlegte , Biden durch Hillary Clinton zu ersetzen
Die engsten Berater von Präsident Barack Obama haben im Geheimen überlegt , Vizepräsident Joe Biden im Wahlkampf 2012 durch Hillary Clinton zu ersetzen , so die New York Times .
Die Enthüllung ist die beachtenswerteste Überraschung des lang erwarteten Werkes von Mark Halperin und John Heilemann über den Wahlkampf 2012 , „ Double Down : Game Change 2012 “ .
Der Times liegt ein Exemplar des demnächst erscheinenden Buchs vor und sie berichtete am Donnerstagabend , dass die Topberater des Präsidenten „ umfangreiche Gruppensitzungen und Umfragen Ende 2011 “ durchgeführt hätten , um herauszufinden , ob es für Obamas schwindende Hoffnung auf Wiederwahl besser aussehe , wenn er Biden fallen lasse .
Laut Jonathan Martin , nationalpolitischer Korrespondent der Times , zeichnet das Buch gründlich die Geschichte der Bemühungen führender Mitarbeiter der Kampagne und des Weißen Hauses nach , namentlich des früheren White House Chief of Staff Bill Daley , zu messen , welchen Effekt es auf die Umfragewerte habe , die ehemalige Außenministerin Clinton gegen den Vizepräsidenten zu tauschen .
Der potenzielle Wechsel war ein streng gehütetes Geheimnis innerhalb der Kampagneninfrastruktur in Chicago und im Oval Office .
Nur ein halbes Dutzend der engsten Berater des Präsidenten – einschließlich Daley , dem früheren Kampagnenleiter Obamas , Jim Messina , und der früheren leitenden Berater des Weißen Hauses , David Axelrod und David Plouffe – wussten über den angedachten Wechsel Bescheid .
In „ Double Down “ wird behauptet , Daley habe an der Spitze der Bemühungen gestanden , Biden trotz ihres „ engen , persönlichen Verhältnisses “ auszutauschen , ehe man sich schließlich gegen einen solchen Schachzug entschied , nachdem die Daten zeigten , dass die Kandidatur Clintons „ die Chancen Obamas nicht maßgeblich verbessern “ würde .
In einem Interview mit Martin bestätigte Daley , dass die Regierung tatsächlich überlegt habe , Biden durch Clinton zu ersetzen .
„ Ich äußerte eine ganze Reihe von Dingen , die man in Erwägung ziehen sollte , und das war eines davon “ , erklärte Daley dem Magazin .
Man muss sich in Erinnerung rufen , dass der Präsident damals furchtbare Umfragewerte hatte , also dachten wir : „ Um Gottes Willen , was machen wir ? “
Während Daley die Untersuchungen als „ gebotene Sorgfalt “ bezeichnete , sagte Martin gegenüber Anderson Cooper von CNN , dass während der Kampagne für die Wiederwahl erheblicher Aufwand betrieben worden sei , um herauszufinden , ob ein solcher Zug sich im Hinblick auf die Wahlurnen auszahle .
„ In Kampagnen wird nicht so viel Geld für Umfragen und Fokusgruppen ausgegeben , wenn man nicht ernsthaft über etwas nachdenkt “ , erklärte Martin auf AC360 .
Es ist allerdings nicht klar , ob Obama wusste , dass sein Team über einen Austausch nachdachte .
Martin sagte gegenüber CNN , er habe Daley gefragt , ob sein damaliger Boss über den potenziellen Wechsel Bescheid gewusst hätte .
Wenngleich Daley erklärte , er glaube nicht , dass sich der Präsident der möglichen Veränderung „ bewusst war “ , gab der frühere Stabschef zu , es sei „ möglich “ gewesen , dass Obama davon gewusst habe .
Martin fügte hinzu , dass „ Double Down “ keine definitive Antwort auf die Frage liefere , ob die politischen Sondierungen Obamas Schreibtisch erreicht hätten .
Cooper fragte Martin , ob er ernsthaft denke , Obama habe nichts von den Untersuchungen darüber gewusst , ob man Biden bei den Wahlen fallen lassen solle .
„ Möglich “ , erwiderte Martin .
Was passiert unterwegs mit meiner E @-@ Mail ?
E @-@ Mail heißt ja eigentlich elektronischer Brief .
Wurde beim Entwurf des Internet @-@ Dienstes E @-@ Mail ähnlich wie bei der herkömmlichen Post technisch das Briefgeheimnis umgesetzt ?
Bei der Konzeption der frühen Internetdienste stand im Vordergrund , Kommunikation möglich zu machen .
Daher hat man bei den grundlegenden technischen Protokollen nicht darauf geachtet , ein stabiles Fundament für einen anhörsicheren Briefwechsel zu schaffen .
Daher entspricht eine herkömmliche E @-@ Mail eher einer offenen Postkarte als einem versiegelten Brief .
Wenn Nutzerin &quot; Anna &quot; an &quot; Benni &quot; eine Mail schickt , sind die Rechner der beiden dann direkt verbunden ?
Das E @-@ Mail @-@ Programm oder der Browser von Anna schickt im ersten Schritt die Mail an den Mail @-@ Server ihres Service @-@ Providers .
Wenn sie zum Beispiel ein GMail @-@ Konto hat , wäre das Google .
Dieser Mail @-@ Server schickt den Inhalt an den Provider , den Benni nutzt .
Auf der Strecke kann die Mail über etliche andere Server im Internet laufen .
Bennie kann den Inhalt dann bei seinem Provider anrufen .
Werden herkömmliche E @-@ Mails auf ihrem Weg durchs Netz mitgelesen ?
Die meisten Mails werden unterwegs mehrfach von Software @-@ Robotern gelesen .
Beim Provider des Absenders wird in der Regel überprüft , ob die Mail ein Schadprogramm als Anhang mit sich führt .
Auf den Empfänger @-@ Systemen wird ebenfalls ein Virus @-@ Check vorgenommen .
Außerdem überprüfen die Provider , ob es sich um eine lästige und unerwünschte Spam @-@ Mail handelt , die gleich gelöscht oder zumindest in einen Spam @-@ Ordner wegsortiert wird .
Haben die Roboter noch eine weitere Aufgabe ?
Bei Systemen wie GMail ermittelt der Roboter auch die Informationen , die Google zum Platzieren von Kontext @-@ Werbung benötigt .
Wenn Anna und Benni per GMail über ihre kommenden Ferienreise kommunizieren , kann Google entsprechende Links zu Urlaubsangeboten einblenden .
Lesen auch unbekannte Menschen die E @-@ Mails mit ?
Die Wahrscheinlichkeit , dass unbefugte Personen eine Mail mitlesen , ist äußerst gering .
Theoretisch ist das aber möglich .
In Firmen haben häufig Administratoren die Möglichkeit , elektronische Post mitzulesen .
Auch die Strafverfolgungsbehörden und Geheimdienste haben legale Möglichkeiten , E @-@ Mails abzufangen oder zur Kenntnis zu nehmen .
Dazu kommen mögliche illegale Ausspäh @-@ Aktionen .
Ist es möglich , E @-@ Mails gegen das Mitlesen zu schützen ?
Mit einer Verschlüsselung nach dem OpenPGP @-@ Standard kann eine E @-@ Mail wirksam gegen Mitlesen verschlüsselt werden .
Mit hohem technischen Aufwand ist es auch möglich , die Metadaten einer E @-@ Mail @-@ Kommunikation zu verschleiern , so dass nicht einmal ohne weiteres erkannt werden kann , wer mit wem kommuniziert hat .
Wie wichtig sind Yahoo und Google auf dem E @-@ Mail @-@ Markt in Deutschland ?
Bei den hauptsächlich privat verwendeten Postfächern spielen Yahoo und Google laut einer Untersuchung von Convios Consulting aus dem August 2013 nur eine untergeordnete Rolle .
Während die Anteile von Yahoo @-@ Mail zuletzt gefallen waren , konnte GMail von Google deutlich zulegen .
Mutter im Wald verscharrt und Rente kassiert
Als seine betagte Mutter starb , schmiedete ein Mann aus Wolfsburg einen Plan .
Er begrub die Tote in einem Wald - und kassierte weiterhin ihre Rente und Pflegegeld .
Um weiter Rente und Pflegegeld kassieren zu können , hat ein 67 @-@ jähriger Wolfsburger seine tote Mutter nach Ermittlungen der Polizei im Wald begraben .
Zunächst habe er den Tod der 89 @-@ Jährigen vertuscht , dann habe er das Geld mehr als anderthalb Jahre lang eingestrichen .
Nun muss sich der 67 @-@ Jährige wegen Betrugs verantworten , wie ein Sprecher am Freitag sagte .
Demnach versteckte der Mann die Frau in einem Wald in der Nähe von Helmstedt .
Verdächtigt wurde der Mann bereits im Mai : Damals fiel auf , dass für die pflegebedürftige Mutter keine Medikamente mehr benötigt wurden .
Den Ermittlern erzählte der Rentner , seine Mutter sei nach Spanien gereist .
Weil den Beamten dies merkwürdig vorkam , ermittelten sie weiter .
Dabei kam heraus , dass die beiden seit mehr als 15 Jahren in einer gemeinsamen Wohnung gelebt hatten und er sie zuletzt gepflegt hatte .
Der 67 @-@ Jährige habe schließlich den Tod seiner Mutter eingeräumt .
Eine Obduktion ergab laut Polizei keine Anhaltspunkte für ein Kapitalverbrechen .
Lust auf Eiscreme , die im Dunkeln leuchtet ?
Ein britischer Unternehmer hat das erste im Dunkeln leuchtende Eis entwickelt – mithilfe von Quallen .
Charlie Francis machte sich die fluoreszierenden Eigenschaften der Meerestiere zunutze und schuf daraus eine leuchtende Leckerei .
Die Idee dazu kam ihm , nachdem er eine Forschungsarbeit über Quallen gelesen hatte und chinesische Wissenschaftler überzeugen konnte , das leuchtende Protein künstlich herzustellen .
Die Eiscreme reagiert beim Verzehr mit der Zunge , wodurch der pH @-@ Wert im Protein angehoben und das Leuchten ausgelöst wird .
Chris erklärt , das Speiseeis reagiere auf die Wärme im Mund und leuchte – je mehr man also leckt , desto heller wird es .
Charlie , Gründer der Eiscremefirma „ Lick Me I &apos; m Delicious “ , sagt : „ Das Produkt ist unglaublich , aber noch in einer sehr frühen Produktionsphase , und so bekommt man zwei Gramm davon für 200 Pfund . “
Das in der Eiscreme verwendete Protein reagiert mit der Zunge bei einem neutralen pH @-@ Wert .
Wenn der Mund das Protein erwärmt , steigt der pH @-@ Wert und das Eis leuchtet .
Wir haben es in den letzten Monaten getestet und es erschien uns ideal , es an Halloween auf den Markt zu bringen , weil es diesen wunderbaren Leuchteffekt hat .
Es ist wahrscheinlich die teuerste Eiscreme , die ich je hergestellt habe , denn der Quallenleuchtstoff ist viermal teurer als Gold .
Jede Kugel kostet mich etwa 140 Pfund .
Aber dafür schmeckt es lecker .
Charlies experimentelle Firma mit Sitz in Bristol ist berühmt für ihre ungewöhnlichen Geschmacksrichtungen , zu denen Bier , Käse , Rindfleisch und Blattgold gehören .
Doch seine neueste Schöpfung soll noch ambitionierter werden .
Er sagt : „ Ich möchte gern eine unsichtbare Eiscreme entwickeln . “
Das ist an und für sich unmöglich aufgrund der Lichtbrechung , die durch die Eiskristalle hervorgerufen wird , aus denen Eiscreme besteht ; aber ich vermute , wir finden eine Möglichkeit , es zu schaffen .
Die Eiscreme nutzt die fluoreszierenden Eigenschaften einer Qualle , die von chinesischen Wissenschaftler künstlich hergestellt werden
Der TSV Morsum ist nach sechs Spieltagen noch immer ohne jeden Punkt in der Handball @-@ Verbandsliga .
Ausgerechnet jetzt kommt es für das Team von Ingo Ehlers morgen zum Derby gegen den TSV Daverden , der am vergangenen Wochenende seiner ersten Sieg gefeiert hat .
Mit diesem Spiel beginnt die Saison neu für uns .
&quot; Ich hoffe , dass wir endlich mal den Kopf frei haben &quot; , gibt sich Ehlers verhalten optimistisch .
Dabei hat er endlich mal , mit Ausnahme des dauerverletzten Hendrik Blohme , seinen kompletten Kader zur Verfügung .
Auch Daverden setzt wie wir auf Tempospiel .
Daher müssen wir unsere Fehlerquote gering halten .
In erster Linie gilt es sich jedoch in der Deckung zu steigern , die zuletzt alles andere als einen sicheren Eindruck hinterlassen hat .
Deutlich entspannter gibt sich Daverdens Coach Thomas Panitz nach dem ersten Saisonsieg gegen Nordhorn .
Das Spiel war natürlich eine Hausnummer .
Aber deswegen sind wir noch lange nicht der Favorit , denn im Derby kann immer alles passieren .
Gleichwohl will Panitz nun nachlegen in Morsum , um eine Serie zu starten .
Fehlen wird Jan @-@ Malte Jodat .
Dafür feiert der A @-@ Jugendliche Joost Windßuß , der mit Doppelspielrecht beim A @-@ Jugend @-@ Bundesligisten HC Bremen aktiv ist , sein Saisondebüt .
Wer in so einem Spiel nicht heiß ist , soll zuhause bleiben .
Halloween 2013 : In Zahlen
Als ich klein war , hatte Halloween etwas Magisches .
Meine Schwester und ich durften Süßigkeiten essen , spät aufbleiben und uns für die Nachbarschaft verkleiden .
Heute bin ich eher zum Halloween @-@ Muffel geworden .
In den letzten zwei Jahren habe ich mich nicht bereit erklärt , von meiner Wohnung aus Süßigkeiten zu verteilen , und werde es wohl auch dieses Jahr nicht tun .
Aber laut Statistik bin ich ein schwarzes Schaf , was Halloween angeht .
Die Mehrheit der Amerikaner – 158 Millionen , um genau zu sein – feiern dieses Jahr Halloween und geben dabei insgesamt 6,9 Milliarden US @-@ Dollar für Süßigkeiten , Kostüme und Dekorationen aus , so der US @-@ amerikanische Verband der Einzelhändler ( NRF ) .
Eine Sache , auf die ich mich jedes Halloween dann doch wieder freue , sind die Trendwerte .
Die Kostüme werden etwa 1,2 Milliarden der 6,9 Milliarden ausgegebenen US @-@ Dollar ausmachen , so der NRF .
In diesem Jahr sind aufreizende unbelebte Gegenstände der letzte Schrei .
Frauen müssen sich nicht mehr in sexy Kleidung hüllen , sie können jetzt auch verführerisches Essen wie etwa Pizza , Hamburger oder Karotten verkörpern .
Was Männer angeht , erwarte ich jede Menge Zombies dank The Walking Dead , und ich wette , die Daft @-@ Punk @-@ Weltraummänner werden es dieses Jahr in die Instagram @-@ Feeds schaffen .
Laut Google sind die meistgesuchten Kostüme Zombies , Batman , Piraten und Hexen .
Ich vermute , es ist nichts verkehrt an Tradition .
Wir haben letztes Jahr unsere Hunde verkleidet und waren damit zu meinem Erstaunen nicht allein .
Tatsächlich geben Amerikaner 330 Millionen Dollar dieses Jahr für Kostüme ihrer Haustiere aus , so der NRF .
Das sind eine Menge „ Hot Dogs “ .
Was Süßigkeiten angeht , sind wir nicht zimperlich .
Amerikaner werden dieses Jahr 1,9 Milliarden Dollar dafür ausgeben , so The Nielsen Company .
Das sind etwa 270 Millionen Kilogramm an Schokoriegeln , Lutschern , Bonbons und Gummibärchen .
Also gute Nachrichten für die laut US @-@ Handelsministerium 41 Millionen Menschen , die mit dem Spruch „ Süßes oder Saures “ durch die Viertel ziehen .
Tatsächlich werden wir über 40 Millionen Kilogramm Schokolade für Halloween kaufen und – machen wir uns nichts vor – essen .
Das Einzige , was wir nicht konsumieren möchten , ist das zuckersüße Candy Corn ; dennoch werden 15 Millionen Kilogramm davon um Halloween verkauft , so der Nationale Verband der Süßwarenhersteller .
Das sind etwa neun Milliarden Maiskörner .
Es ist ein Rätsel , das ich noch nicht lösen konnte .
Nichts gehört mehr zu Halloween als Häuser , in denen es spukt .
Sie haben großartige Namen wie „ Terror Behind the Walls “ ( was übrigens in einem echten Gefängnis steht ) , „ Howl @-@ O @-@ Scream “ und „ The House of Shock “ .
Es gibt tatsächlich 1.200 offiziell anerkannte Spukhäuser in den Vereinigten Staaten , die 500 Millionen Dollar Erlös erzielen , so America Haunts , und das schließt die wunderbaren Fotos ein , auf denen man sich gerade in die Hose pinkelt und die Freunde dann auf Facebook stellen , wo man sie nicht wieder loswird , und einem dann der Typ , auf den man steht , einen Kommentar hinterlässt wie „ netter Gesichtsausdruck “ .
Aber kommen wir endlich zu den Kürbissen .
Charlie Brown machte uns mit dem Großen Kürbis vertraut , als wir Kinder waren , und das Schnitzen einer Kürbislaterne ist wie das Schmücken des Weihnachtsbaums – etwas , das wir von klein auf gemacht haben .
Glücklicherweise begann der „ Baby im Kürbis “ -Trend erst letztes Jahr dank Pinterest , sodass die meisten von uns damit aufgewachsen sind , den Kürbis zurechtzuschnitzen und nicht , darin zu sitzen .
Dieses Jahr werden Amerikaner etwa 106 Millionen Dollar für Kürbisse ausgeben , so das US Census Bureau .
Die Kürbislaterne , die langsam im Vorgarten verrottet , stammt vermutlich aus Illinois , wo dieses Jahr 245 Millionen Kilogramm Kürbisse geerntet wurden .
Wenn Sie richtig punkten möchten , dann rufen Sie Tim und Susan Mathisdon in Napa , Kalifornien an und schnitzen Sie etwas Hübsches aus ihrem 921 Kilo schweren Kürbis .
Wohnungsbrand in Helmbrechts : Rettungskräfte bergen verkohlte Leiche
Die Feuerwehr musste am späten Donnerstagabend in Helmbrechts ausrücken .
Ein Dreifamilienhaus im Landkreis Hof fängt in der Nacht zum Freitag Feuer .
Die Rettungskräfte bergen eine verkohlte Leiche aus dem Haus .
Rettungskräfte haben bei einem Brand in Helmbrechts eine verkohlte Leiche in einem Dreifamilienhaus gefunden .
Ob es sich um einen Bewohner handle sei noch unklar , wie ein Sprecher der Polizei in Bayreuth sagte .
Am späten Donnerstagabend hatte es im Erdgeschoss des Hauses gebrannt .
Als die Feuerwehr eintraf , schlugen die Flammen bereits aus einem Fenster .
Die Einsatzkräfte gingen in die Wohnung und fanden die Leiche in einem Zimmer .
Dieses und ein weiteres Zimmer brannten vollständig aus .
Das gesamte Erdgeschoss wurde beschädigt .
Alle anderen Bewohner seien während des Brands nicht zu Hause gewesen , erklärte der Polizeisprecher weiter .
Das Gebäude sei vorerst nicht mehr bewohnbar .
Die genaue Ursache für das Feuer war zunächst nicht klar .
Deutschlands größte Landeskirche hat eine Offensivegestartet , um für den Beruf des Pastors zu werben .
Hintergrund ist ein möglicher Pfarrermangel : Die Evangelisch @-@ lutherische Landeskirche Hannover rechnet damit , dass sich die Zahl ihrer derzeit rund 1.800 Pastorinnen und Pastoren nach jetziger Lage bis 2030 halbieren wird .
Für junge Leute von heute sei der Beruf sehr attraktiv und biete gute Zukunftsaussichten , sagte Pastor Mathis Burfien ( 43 ) im Gespräch mit dem Evangelischen Pressedienst .
Es ist attraktiv , den Arbeits- und Tagesablauf selbst bestimmen zu können .
Mit Burfien hat die Landeskirche erstmals einen Pastor auf einer vollen Stelle beauftragt , junge Leute für das Theologiestudium zu begeistern .
Zurzeit entscheiden sich immer weniger junge Menschen nach dem Abitur , Theologie zu studieren .
Burfien führt dies auf den Prozess der Entkirchlichung zurück : &quot; Gottes Stimme ist leise , die Welt ist laut &quot; .
Dabei sei der Beruf von großer Freiheit und Vielfalt geprägt .
Ich bin Herr meines Terminkalenders und kann dort meine Schwerpunkte setzen , wo es mir wichtig ist .
Pastoren könnten als Seelsorger ganz nah bei den Menschen sein .
Sie verdienten so viel wie Lehrer und könnten gut davon leben .
Sicherlich werde in der freien Wirtschaft mehr bezahlt , aber dafür hätten Theologen einen sicheren Arbeitgeber .
Das komme den jungen Leuten von heute entgegen , denen es nicht nur um Karriere , sondern um eine sinnerfüllte Arbeit gehe .
Nach Angaben der Landeskirche , die drei Viertel Niedersachsens umfasst , gehen derzeit pro Jahr rund 60 Pastoren in den Ruhestand .
Gleichzeitig beginnen etwa 40 Absolventen eines Theologiestudiums ihr Vikariat .
In dünn besiedelten Randgebieten wie dem Harz , dem Emsland oder dem Wendland könne künftig es schwer werden , Stellen zu besetzen .
Burfien will unter anderem Studientage für junge Leute veranstalten und dazu auch Prominente einladen , die Theologie studiert haben .
Das Theologiestudium biete eine breite Ausbildung .
Man kann damit sogar Bundespräsident werden .
Land Rover Rally Series angekündigt
Im Interieur finden sich Rennsitze und Sechs @-@ Punkt @-@ Gurte sowie eine Freisprechanlage .
Die Optionen reichen von verstärkten Bremsen , einem Servicepaket mit Betreuung von Bowler @-@ Works @-@ Mechanikern und logistischer Unterstützung bis hin zu Fahrzeugeinlagerung zwischen Veranstaltungen .
Drew Bowler , Geschäftsführer von Bowler Motorsport , erklärt : „ Die Rally @-@ Kunden , die zu Bowler kommen , haben sich verändert . “
Sie sind nicht alle erfahrene Rennfahrer , sondern Leute , die auf der Suche nach Spannung und Abenteuer sind sowie nach einem erreichbaren Weg zu Weltklasse @-@ Veranstaltungen .
Wir freuen uns , diesen Weg in Partnerschaft mit Land Rover und der MSA eröffnen zu können und glauben , dass das Format neue Möglichkeiten erschließt , die verschiedenen Rally @-@ Disziplinen in Großbritannien und dem Ausland zu erleben und Neulinge auf die Strapazen und die Wirklichkeit von Rally Raid vorzubereiten .
Wir hatten wirklich Spaß daran , den Defender Challenge @-@ Wagen zu entwickeln – das wird eine unterhaltsame Meisterschaft .
Darüber hinaus gibt es bei der Defender Challenge einen Trainings- und Testtag im Februar sowie die Option , an Wüstenrennen in Nordafrika und dem Nahen Osten teilzunehmen .
Feuerwehr zur Rettung eines Hündchens gerufen , das 15 Meter über dem Boden auf einem gefährlichen Felsvorsprung in einem Steinbruch festsaß
Cockerspaniel @-@ Hündin Ruby war nach einem kleineren Verkehrsunfall davongelaufen
Drei Tage später wurde sie von einem Spaziergänger im Steinbruch in ihrer misslichen Lage entdeckt
Feuerwehrleute seilten sich an Felswand ab und retteten den Hund vor dem sicherem Tod
Der Feuerwehr gelang es , ein Hündchen in Sicherheit zu bringen , das auf einem 15 Meter hohen Vorsprung in einer Felswand festsaß .
Die neun Monate alte Cockerspaniel @-@ Hündin Ruby war nach einem Verkehrsunfall am Sonntagnachmittag davongelaufen und überlebte drei Tage allein , ehe sie am Mittwoch aus einem Steinbruch gerettet wurde .
Scott Alderson , 25 , und seine Freundin Becky Hall , 20 , denen der Hund gehört , kamen zum Steinbruch Flappit in Denholme , West Yorkshire , um Ruby wieder in Empfang zu nehmen und sich bei den Feuerwehrleuten des West Yorkshire Fire and Rescue Service zu bedanken .
Sie hatten verzweifelt nach ihrer vermissten Hündin gesucht und Hilferufe in sozialen Netzwerken veröffentlicht , als sie nach dem kleinen Verkehrsunfall in den Steinbruch entlaufen war .
Etwa gegen 14 : 15 Uhr am Mittwoch sah ein Spaziergänger , der seinen Hund ausführte , die gestrandete Ruby auf dem 15 Meter hohen Absatz im Steinbruch .
Das technische Rettungsteam der Cleckheaton Fire Station eilte zur Stelle und seilte sich zur Rettung Rubys ab , die dann in einer Hundebox nach oben transportiert wurde .
Andy Clayton , Spezialist des technischen Rettungsteams , sagte : „ Sie war in einer gefährlichen Lage .
Sie befand sich in der Mitte der Felswand – 15 Meter von oben und dem Boden entfernt .
Sie bewegte keinen Muskel während ihrer Rettung – sie war wie steifgefroren .
Aber jetzt geht es ihr gut .
Sie hat anschließend ein paar Hundekuchen gefressen .
Das war ein ziemlich ungewöhnlicher Einsatz .
Die Tatsache , dass der Hund entdeckt wurde , ist unglaublich .
Peter Lau , Spezialist des technischen Rettungsteams , sagte : „ Ruby hatte ein Riesenglück . “
Es bestand die Möglichkeit , dass sie sehr schwer verletzt war oder Schlimmeres .
Ruby wurde zum Tierarzt zur Untersuchung gebracht , der aber außer Erschöpfung und Dehydrierung nichts feststellte .
Becky Hall aus Halifax , West Yorkshire , sagte : „ Bei der Rettung zuzusehen war beängstigend . “
Ich konnte gar nicht glauben , dass sie wirklich da oben war .
Es war wundervoll , sie wieder in den Armen zu halten .
Der Tierarzt erklärte , wenn die Erschöpfung zu groß geworden und sie zusammengebrochen wäre , wäre sie vermutlich abgestürzt .
Die Feuerwehrleute haben Großartiges geleistet .
Es war wirklich mutig , was sie getan haben .
Wir sind einfach so dankbar und jeder von ihnen war absolut unglaublich .
Scott Alderson aus Keighley fügte hinzu : „ Wir hatten Angst , dass sie herunterfallen würde , aber sie blieb oben . “
Die Feuerwehrleute waren großartig .
Ich kann kaum glauben , wo sie war .
Mick Jagger erklärt , er habe Katy Perry nie angemacht , als sie 18 war .
Bei einem Interview mit einem australischen Radiosender diese Woche sagte der Pop @-@ Star , sie habe als Background @-@ Sängerin an Jaggers Song „ Old Habits Die Hard “ aus dem Jahr 2004 mitgearbeitet .
Perry erklärte , sie habe mit dem Altrocker zu Abend gegessen , und dass „ er mich angebaggert hat , als ich 18 war “ .
Sie fügte hinzu : „ Das ist schon lange her und er war sehr nett zu mir . “
In einer Erklärung sagte ein Vertreter Jaggers , 70 , am Donnerstag , dass er „ kategorisch verneint , dass er jemals Annäherungsversuche bei Katy Perry unternommen habe “ .
Der Vertreter ergänzte : „ Vielleicht hat sie ihn mit jemand anderem verwechselt . “
Perry war eine der Sängerinnen , die bei der Rolling @-@ Stones @-@ Tour dieses Jahr einen Gastauftritt hatten .
Ihr neues Album „ Prism “ landete auf Anhieb auf Platz 1 diese Woche .
George Kerevan : Europäische Entflechtung gibt den Schotten die Wahl
Ein neuer Tag , eine neue Schreckensgeschichte zur Unabhängigkeit .
Diesmal werden wir gewarnt , dass ein unabhängiges Schottland erforderlich sei , um dem Schengen @-@ Raum als Bedingung für die EU @-@ Mitgliedschaft beizutreten .
Das liefert das Stichwort für Geschichten über Passkontrollen in Berwick und eine mit Stacheldraht gesicherte Grenze entlang des Hadrianswalls .
In der Tat wurde in der Strathclyde @-@ Vorlage auf die möglichen wirtschaftlichen Vorteile hingewiesen , die mehr Reisefreiheit im restlichen Europa mit sich bringen würde , doch spielte dies – erwartungsgemäß – in den Schlagzeilen keine Rolle .
Auch hat niemand erwähnt , dass sich die EU @-@ Mitgliedsstaaten häufig ihre strikten Regeln zurechtbiegen , wenn es für sie günstiger ist .
Da Schottland derzeit nicht zum Schengen @-@ Raum gehört , wäre die fortgesetzte Nichtbeachtung für Brüssel nur ein kleines Zugeständnis im Gegenzug für das , was man wirklich von den Schotten will .
Also eigentlich keine Story .
Und eine , die schon so in der Jahre gekommen ist , dass sie bereits einem Fossil gleicht : Das erste Mal habe ich die „ Unabhängigkeit bedeutet Passkontrollen “ -Ente vor mindestens 40 Jahren gehört .
Dabei geht ein interessanter Punkt beim ständigen Wiederholen dieser uralten Geschichte verloren .
Weshalb sollte man von einem unabhängigen Schottland erwarten , dass es nach der europäischen Pfeife tanzt ?
Warum das Londoner Joch gegen das von Brüssel eintauschen , besonders jetzt ?
Das sind die wirklichen europäischen Neuigkeiten : Der große , nach dem Krieg gefasste Plan zur Vereinigung Europas ist ins Stocken geraten .
Mit der Eurokrise ist das Projekt Europa offiziell gestorben .
Überall in der EU gewinnen Parteien an Boden , die EU @-@ feindlich sind oder den Euro als Gemeinschaftswährung über Bord werfen möchten .
Selbst in Deutschland konnte die euroskeptische Partei Alternative für Deutschland – erst dieses Jahr gegründet – knapp fünf Millionen Stimmen bei der Bundestagswahl im September für sich ergattern und damit effektiv die Freien Demokraten ( das Äquivalent zu den britischen Liberal Democrats ) aus dem Bundestag vertreiben .
Es gab schon immer heimischen Widerstand gegen den Plan , ein föderalistisches Europa zu schaffen .
Die aktuelle Wirtschaftskrise stellt sich allerdings als Wendepunkt heraus .
Wegen der von Berlin und der Europäischen Zentralbank verhängten strengen Sparpolitik in Verbindung mit der Zwangsjacke , in die die jeweilige nationale Wirtschaft durch das Festhalten an der gemeinsamen Währung genötigt wird , sind viele Menschen der Ansicht , das Projekt Europa sei zu weit gegangen .
Die Krise des Euro hat wenig damit zu tun , dass nationale Regierungen exzessive Haushaltsdefizite verursachen – das war nur in Griechenland der Fall .
Stattdessen hat das Eurosystem seine Mitglieder auf Wechselkurse festgenagelt , die für deutsche Exporteure vorteilhaft sind – und das möchten deutsche Politiker gern so lassen .
Ohne die Möglichkeit einer Abwertung der lokalen Währung findet sich Südeuropa mit einem eingebauten Produktivitätsnachteil gegenüber Deutschland wieder .
Die einzige Möglichkeit besteht darin , Löhne und öffentliche Ausgaben zu kürzen – angespornt von Berlin .
Hinter den aktuellen Etat- und Währungsproblemen liegt ein tiefer gehendes europäisches Produktivitätsproblem .
Als Folge der von Brüssel verordneten „ grünen “ Energierichtlinien – ein Code für die Subventionierung französischer und deutscher Energieunternehmen auf Kosten der Verbraucher – zahlt die europäische Industrie verglichen mit den Vereinigten Staaten das Doppelte für Elektrizität und das Vierfache für Gas .
Das ist ein lähmender Kostennachteil , wie wir bereits in Grangemouth sehen konnten .
Alle Lohnfestschreibungen der Welt schützen die europäische petrochemische Industrie nicht davor , von billigem amerikanischem Schiefergas in die Ecke gedrängt zu werden .
Als Folge zieht eine Revolte herauf , besonders in Frankreich , dem einstigen Cheerleader der EU .
Nach dem Krieg sah die politische Elite Frankreichs die EU als ein Vehikel , mit dem man Deutschland in Schach halten und Paris auf Augenhöhe mit Washington heben konnte .
Doch Berlin braucht Paris nicht mehr als Tor zur politischen Legitimation und hat Europa seine eigene Wirtschaftspolitik aufgedrückt , womit die angeschlagene französische Wirtschaft zu kämpfen hat .
Das Ergebnis : Marine Le Pens rechtsgerichteter , EU @-@ feindlicher Front National hat gerade eine entscheidende Nachwahl gewonnen und damit die regierenden Sozialisten auf Platz drei verwiesen .
Der Front National ist nun die beliebteste Partei in Frankreich mit 24 Prozent der Wählerstimmen – eine zeitgerechte Warnung für die britische Labour @-@ Partei , dass sie nicht davon ausgehen kann , eine Spaltung im rechten Spektrum würde automatisch Vorteile für die Linke bedeuten .
Was macht Le Pen mit ihrer neu gewonnen Popularität unter den weißen Franzosen der Arbeiterklasse ?
Sie möchte die EU @-@ Wahlen nächstes Jahr dazu nutzen , einen Anti @-@ EU- , Anti @-@ Gemeinschaftswährungsblock im Europäischen Parlament zu schmieden .
Falls die Anti @-@ EU @-@ Parteien bei diesen Wahlen gut abschneiden – und das ist sehr gut möglich – , dann könnte erstmals ein solcher Block das Europäische Parlament dominieren .
Dies ist der Punkt , auf den ich hinaus will : In nicht allzu ferner Zukunft wird das wachsende Ressentiment gegen die EU und die gemeinsame Währung sich zur Abschaffung des Euro zusammenfinden .
Die EU wird nicht verschwinden , aber sie wird eher so etwas wie das „ Europa der ( souveränen ) Nationen “ werden , das General de Gaulle favorisierte .
Deutschland und ein paar seiner Satelliten @-@ Wirtschaften halten vielleicht am Euro fest , aber Frankreich und Südeuropa werden zu ihren eigenen Währungen zurückkehren .
Ich erwarte , dass sich Großbritannien von diesem Projekt distanziert in der Hoffnung , sich bei den USA einzuschmeicheln .
Allerdings legt Washingtons wachsendes Interesse am Pazifikraum nahe , dass Großbritannien allein im atlantischen Regen stehen wird .
Wo bleibt Schottland bei all dem ?
Wir können entscheiden , eine Region von ( in letzter Konsequenz ) Klein @-@ England zu sein .
Oder wir können unsere eigenen wirtschaftlichen Interessen verteidigen – wozu auch gehört , Berlin und Brüssel zu sagen , was sie sich wo hinstecken können .
Ich vermute , Schottland könnte in einem lockereren europäischen Verbund ganz gut fahren , sofern wir unsere eigene Währung behalten .
Die Kooperation mit anderen , ähnlich denkenden Ländern ist in einem nicht föderierten Europa der Nationen einfacher .
Ansonsten sollten wir erwägen , es Norwegen gleichzutun und unsere wirtschaftliche Unabhängigkeit behalten .
Die SNP @-@ Regierung in Schottland ist – bemerkenswerterweise – die erfolgreichste politische Bewegung gegen die Sparpolitik in Europa und hat 2011 eine spektakuläre Mehrheit aufgrund der Ablehnung der vorgeschlagenen ( und vorgenommenen ) Kürzungen gewonnen , die der Labour @-@ Finanzminister Alistair Darling und die nachfolgende Tory @-@ Lib Dem @-@ Koalition zu verantworten hatten .
Es wäre für Schottland lächerlich , sich jetzt für eine Unabhängigkeit zu entscheiden , nur um dann von Berlin und Brüssel eine Sparpolitik aufgezwungen zu bekommen .
Frühe Pubertät : Schneller erwachsen werden
Afroamerikanische und hispanische Mädchen erreichen tendenziell eher die Pubertät als ihre weißen Altersgenossinnen , wie Untersuchungen zeigen .
Körperliche Veränderungen bedeuten noch nicht unmittelbar die Pubertät
Es gibt keinen Beleg dafür , dass Hormone oder andere Chemikalien verantwortlich sind
Experten glauben , die epidemische Fettleibigkeit sei ein Auslöser der frühen Pubertät
Der Trend zur frühen Pubertät ist weniger ausgeprägt bei Jungen
Die frühere CNN @-@ Korrespondentin Pat Etheridge ist eine Journalist , die sich auf Kindergesundheit und Familienthemen spezialisiert hat .
Sollte eine Mutter besorgt sein , wenn ihrer Tochter schon im Alter von sieben oder acht Jahren Brüste und Schamhaare wachsen ?
Bei der jährlichen Konferenz des Kinderärzteverbandes American Academy of Pediatrics diese Woche in Orlando , Florida , erklärte der pädiatrische Endokrinologe Dr. Paul Kaplowitz , dass diese frühen körperlichen Veränderungen relativ normal unter amerikanischen Mädchen seien und eine neue Norm darstellten .
„ Ich verbringe viel Zeit damit , Eltern zu beruhigen – normalerweise ist das kein Anzeichen dafür , dass nun schnell die Pubertät eintritt “ , erläuterte Kaplowitz .
Offensichtliche Anzeigen der Entwicklung , wie zum Beispiel wachsende Brüste , Scham- und Achselhaare sowie Körpergeruch , zeigen sich bei Mädchen früher .
Dennoch es gab nur eine leichte Verschiebung beim Alter der Menarche ( Auftreten der ersten Regelblutung ) in den letzten 40 Jahren .
In den Vereinigten Staaten liegt das Durchschnittsalter bei 12,5 Jahren , etwas weniger als 12,75 im Jahr 1970 .
„ Wenn die Entwicklung der Brüste beginnt , dauert es noch mindestens zwei bis drei Jahre bis zur Menarche “ , sagte Kaplowitz , auch Autor des Buchs „ Frühe Pubertät bei Mädchen : Der essentielle Ratgeber zum Umgang mit diesem häufig auftretenden Problem “ .
Zeit ist der genaueste Test , wie die Pubertät voranschreitet .
Es ist umstritten , was tatsächlich den Beginn der Pubertät darstellt , doch gilt es „ frühreif “ , wenn die Brustvergrößerung von einem Wachstumsschub vor einem Alter von acht Jahren begleitet wird .
In den meisten Fällen verlangsamt sich der Prozess oder stagniert – etwas , das ein Kinderarzt genau überwachen kann .
Bei schnellerem Voranschreiten könnten Tests durch einen Endikronologen angezeigt sein , damit ernste Probleme wie Tumore oder Zysten ausgeschlossen werden können .
Es gibt Behandlungsmethoden zum Verzögern einer frühen Menstruation und der Abwehr einer anderen Folge : der vorzeitigen Alterung der Knochen , die ultimativ zu Wachstumshemmung und damit kleinem Körperwuchs bei Erwachsenen führen kann .
Die Empfehlungen für eine medikamentöse oder hormonelle Therapie orientieren sich am Alter des Kindes , der Entwicklungsgeschwindigkeit , der Wachstumsrate und der emotionalen Reife .
Psychosoziale Aspekte sind ebenfalls wichtig .
Kaplowitz ist zurückhaltend , was Medikamente angeht , aber er räumt ein : „ Das Unterdrücken der Pubertät kann Verhaltensprobleme und die Gefühle von Mädchen mildern , anders als ihre Altersgenossinnen zu sein . “
Das andere große Problem ist verständlich : Eltern möchten einfach nicht , dass ihre sehr jungen Töchter die Periode haben .
„ Sie sorgen sich wegen des Schwangerschaftsrisikos oder darüber , wie sie die hygienische Seite handhaben “ , sagte Kaplowitz .
„ Es war ein Schock “ , erinnert sich eine Frau , deren Tochter mit zehn ihre Tage bekommen hat .
Auch wenn es erste Anzeichen gab und wir über Menstruation gesprochen hatten , war sie emotional nicht vorbereitet .
Sie kam verängstigt und aufgeregt von der Schule nach Hause , weil sie die erste in ihrem Freundeskreis war .
Es gibt viele umfassend publizierte Theorien über die Ursachen frühzeitiger Pubertät .
Doch es liegen keine schlüssigen Beweise dafür vor , dass Hormone in Milch oder anderen Nahrungsmitteln , Chemikalien in der Umwelt oder sexuelle Botschaften in den Medien ursächlich wären .
Jungen kommen ähnlich wie Mädchen früher in die Pubertät .
Kaplowitz ist der Ansicht , die überzeugendste Prämisse sei die Epidemie der Fettleibigkeit .
Er unterstützte die Durchführung einer Studie im Jahr 2001 über Mädchen im Alter von sechs bis neun Jahren , die einen Zusammenhang zwischen Körperfett und dem Eintritt in die Pubertät herstellt .
Andere Untersuchungen unterstützen diese Schlussfolgerung , aber es gebe viele andere Faktoren , die eine Rolle spielten .
In diesem Land erreichen afroamerikanische und hispanische Mädchen tendenziell eher die Pubertät als ihre weißen Altersgenossinnen .
Es gibt dafür unterschiedliche Erklärungen .
Global scheint eine frühe Pubertät von allen möglichen Dingen beeinflusst zu sein , von Wirtschaftsbedingungen über das Klima bis zu den Genen .
Ein weiteres Rätsel : Obwohl Jungen die Gesichts- und Schambehaarung schon früher wächst , ist der Trend zu einer vollumfänglichen früheren Pubertät nicht so ausgeprägt wie bei Mädchen .
Andere Ärzte auf der AAP @-@ Konferenz unterstrichen die Komplexität des Themas .
Das Auftauchen von Akne und Schamhaar ist selbst bei Babys und Kleinkindern verbreitet .
„ Wir müssen vorsichtig sein , wie wir den wahren Beginn der Pubertät identifizieren “ , sagte Dr. Lawrence Silverman , ein pädiatrischer Endokrinologe am Goryeb Children &apos; s Hospital in Morristown , New Jersey .
Eltern sollten nicht zögern , sich von ihrem Kinderarzt beraten zu lassen , wie sie mit ihrem Kind sprechen sollten .
„ Das kann bedeuten , dass man früher als erwartet ein Gespräch führen muss “ , riet Kaplowitz .
Wenn man ruhig bleibt , reagiert das Kind normalerweise gut .
Mädchen , die früh erblühen , brauchen die Versicherung , das der Prozess ein normaler Teil des Lebens ist , selbst wenn er früher als gedacht eintritt .
Jumbo @-@ Hersteller streiten im Angesicht großer Bestellungen über Sitzbreite
Zwischen führenden Flugzeugherstellern ist es zu einer Auseinandersetzung über die Breite von Sitzen in der Touristenklasse bei Langstreckenflügen gekommen , was den Ton für einen bitteren Zusammenstoß auf der Dubai Airshow diesen Monat angibt .
Der Streit dreht sich um die Sitzbreite , die Passagieren bei langen Flügen in der Touristenklasse angeboten wird – nicht immer diejenigen , um die sich Fluggesellschaften am meisten bemühen , doch dieser ausgewiesene Raum stellt den Schlüssel für die Effizienzbehauptungen bei den neuesten Flugzeugen von Airbus SAS und Boeing Co. dar .
Airbus forderte diese Woche einen Branchenstandard , der eine Sitzbreite von mindestens 46 cm ( 18 Zoll ) in der Touristenklasse vorschreibt , doch der US @-@ amerikanische Erzrivale Boeing sagt , das sollten die Fluggesellschaften entscheiden .
Die Auseinandersetzung kommt zu einem Zeitpunkt , da die Flugzeugbauer darum wetteifern , noch größere Versionen ihrer zweimotorigen Langstreckenflieger zu verkaufen , und bei der Veranstaltung vom 17. bis 21. November Rekordaufträge erwarten .
Wie der hintere Teil des Flugzeugs ausgestaltet ist – insbesondere ob es Reihen mit neun oder zehn Sitzen gibt – , ist entscheidend für die angegebenen wirtschaftlichen Ergebnisse , die das neue „ Mini @-@ Jumbo “ -Design liefern soll .
Boeing behauptet , seine modernisierte „ 777X “ fasse 406 Personen bei Sitzen in der Touristenklasse , die über 17 Zoll breit sind und so zehn pro Reihe erlauben .
Airbus erklärt , die konkurrierende Version des A350 befördere 350 Personen in 18 Zoll breiten Sitzen in der Touristenklasse , wobei es neun pro Reihe gibt .
Flugzeuggiganten teilen häufig Hiebe über technische Details mittels Werbung in der Fachpresse aus .
Jetzt appelliert Airbus vor der Dubai Airshow , wo die 777X mit über 100 Bestellungen voraussichtlich das Rennen machen wird , direkt an die Öffentlichkeit .
Kürzlich stellte das Unternehmen eine Anzeige vor , die der Beginn eines neuen Anzeigenkriegs sind könnte und Geldgebern ein Bild zeigte , in dem drei Personen zusammengequetscht in einem Restaurant sitzen , und dazu der Titel : „ Würden Sie das akzeptieren ? “
„ Boeing schlägt Langstreckenflüge in Sitzen vor , die enger sind als regionale Turbo @-@ Props “ , sagt Airbus @-@ Vertriebschef John Leahy .
Angesichts geänderter Ernährungsgewohnheiten werden die Leute dicker , doch Flugzeugsitze haben sich nicht radikal verändert .
Zwischen den frühen 1970ern , als die Boeing 747 die moderne Langstreckenreise definierte , und dem Ende des Jahrhunderts hat das Gewicht des männlichen Durchschnittsamerikaners zwischen 40 und 49 Jahren um zehn Prozent zugenommen , so die Daten des US @-@ Gesundheitsministeriums .
Der Taillenumfang des männlichen Durchschnittsamerikaners im 21. Jahrhundert beträgt laut US @-@ amerikanischen Gesundheitsstatistiken 100,8 cm .
Airbus sagt , sein Rivale halte sich an ein Sitzkonzept aus den 1950ern , als der durchschnittliche Körperumfang des frisch getauften „ Jet Set “ schmaler war .
Man habe , so Airbus , Untersuchungen durchgeführt , die belegten , dass ein zusätzliches Zoll ( 2,54 cm ) pro Sitz die Schlafqualität um 53 Prozent steigere .
Boeing bestreitet die Zahlen von Airbus zu den Sitzmaßen und sagt , es stehe nicht im Ermessen der Hersteller zu entscheiden , wie Fluggesellschaften die Balance zwischen Flugtarifen und Einrichtung gestalten .
Das Unternehmen erklärt auch , laut Untersuchungen hänge das Erlebnis im Flugzeug von mehr als der Sitzbreite ab .
„ Es läuft wirklich darauf hinaus , Fluggesellschaften Flexibilität zu geben , damit sie das tun können , was sie ihrer Ansicht nach müssen , um erfolgreich zu sein “ , erläutert der Flugkabinenexperte Kent Craver von Boeing .
Sie möchten nicht , dass wir ihnen diktieren , was sie profitabel macht .
Sie kennen ihr Geschäft besser als jeder andere .
Für Fluggäste geht es um mehr Ellenbogenfreiheit , aber für Hersteller wird es in zunehmendem Maße ein Thema , das sich auf die Umsätze auswirken kann .
Hinter der Auseinandersetzung steht ein Rennen um Flugzeugbestellungen mit einem geschätzten Volumen von mindestens 700 Milliarden US @-@ Dollar nach Listenpreisen in den kommenden Jahrzehnten , was sich nachhaltig auf die Exportbilanz der USA oder Europas auswirken könnte .
Wie Reuters im Juli erstmals berichtete , ist das Sitzlayout die treibende Kraft hinter der Auseinandersetzung um die neuen Jets .
Sowohl Airbus als auch Boeing behaupten 20 Prozent mehr Effizienz pro Sitz bei ihren neuesten zweimotorigen Langstreckendesigns als der Marktführer in diesem Segment , die 365 @-@ sitzige Boeing 77 @-@ 300ER .
Die Aussagen Boeings zu den Ergebnissen hängen teilweise davon ab , dass die 777X mit ihren zehn Sitzen pro Reihe mit dem Originaldesign von neun Sitzen in der 777 verglichen wird .
Die gestiegenen Kosten pro Einheit sind immer noch geringer als bei derzeit verwendeten Maschinen mit zehn Sitzen pro Reihe .
„ Boeing quetscht deshalb mehr Sitze in sein Flugzeug , um es wettbewerbsfähiger zu unseren Produkten zu machen “ , sagt Kevin Keniston , Leiter für Passagierkomfort bei der europäischen Airbus .
Andererseits sagen Analysten , volle Kabinen mit zehn Sitzen pro Reihe bei vorhandenen 777s deuteten darauf hin , dass sich viele Passagiere für die engere Anordnung entschieden , was mit billigeren Flugtarifen einhergehen könnte .
„ Achtzehn Zoll Sitzbreite wären toll für Passagiere , aber die Wirklichkeit ist : von einem wirtschaftlichen Gesichtspunkt aus ist das Airbus @-@ Angebot von der Bedrohung durch die 777 gesteuert “ , sagt Mary Kirby , Expertin für Kabineneinrichtung , Gründerin und Herausgeberin von Runway Girl Network .
Airbus und Boeing bieten keine Sitze an , sondern einen Katalog von Zulieferern , aus denen die Fluggesellschaften auswählen können .
Die weltreisenden Jet @-@ Verkäufer tragen sogar Bandmaß bei sich , um die Einrichtung bei der Konkurrenz nachzumessen .
Selbst wenn sie den Komfort anpreisen , so bieten doch alle Hersteller auch Jets mit hochverdichteter Ausgestaltung für Billigfluglinien und regionale Flüge .
Airbus bietet einen A350 mit zehnsitzigen Reihen , hat aber laut eigener Aussage noch keinen verkauft .
Bis vor kurzem hat Airbus betont , wie wichtig mehr Anpassbarkeit der Kabinen sei und für einige Jets breite Sitze an den Gängen angeboten .
Ohne die Unterstützung des einzigen anderen Herstellers großer moderner Jets sagen Experten , dass der Ruf nach einem neuen Branchenstandard vermutlich verpuffen werde , aber von der Welle von 777X @-@ Verkäufen ablenken könnte .
Neuer Anti @-@ Nikotin @-@ Impfstoff könnte dem Vergnügen beim Rauchen den Garaus machen
Wissenschaftler haben einen Anti @-@ Nikotin @-@ Impfstoff entwickelt , der den Spaß am Rauchen verderben könnte .
Eine einzige Dosis des Impfstoffs konnte Mäuse ein Leben lang vor Nikotinsucht schützen .
Vor Tests am Menschen werden noch weitere Versuche benötigt , was noch einige Jahre dauern kann , doch Professor Ronald Crystal vom Weill Cornell Medical College in New York sagte , die ersten Ergebnisse seien gut .
„ Wir sind sehr hoffnungsvoll , dass diese Art von Impfstrategie einmal Millionen von Rauchern helfen kann , die versucht haben aufzuhören und dabei alle auf dem Markt erhältlichen Methoden ausprobiert haben , aber erleben mussten , dass ihre Nikotinsucht stärker ist als diese Ansätze “ , so Cornell .
Der neue Impfstoff enthält einen harmlosen Virus , der so verändert wurde , dass er die genetischen Informationen zur Herstellung von Nikotin @-@ Antikörpern enthält .
Der Virus infiziert selektiv die Leberzellen , die dann einen ständigen Strom von Antikörpern produzieren .
Die Antikörper jagen die Nikotinmoleküle im Blut und neutralisieren sie , ehe sie das Gehirn erreichen , wodurch ein Raucher kein Nikotin @-@ High erfährt .
In Versuchen behielten geimpfte Mäuse , denen Nikotin verabreicht wurde , ihr normales Aktivitätsniveau bei .
Mäuse ohne Impfung dagegen hätten eine „ Auszeit “ genommen , erklärten die Forscher , ein Zeichen dafür , dass das Nikotin ihr Gehirn erreicht habe .
Die Experimente sind im Fachblatt Science Translational Medicine beschrieben .
Frühere Tabakimpfstoffe schlugen fehl , weil sie Antikörper enthielten .
Die Impfungen mussten zur Aufrechterhaltung des Antikörperpegels so häufig gegeben werden , dass sie teuer und unpraktisch waren .
Doch die Kosten des neuen Impfstoffs sind wahrscheinlich deutlich niedriger , denn er verwandelt Leberzellen in Antikörperfabriken .
Wie Professor Crystal sagte , könnte ein zukünftiger Impfstoff für Menschen , wenn er ganz sicher sei , Kindern verabreicht werden , ehe sie in Versuchung gerieten , eine Zigarette zu probieren , und so Nikotinsucht verhindern .
Wahrscheinlicher aber ist , dass Raucher ihn einsetzen würden , um aufzuhören .
„ Sie wissen dann : Wenn sie wieder anfangen zu rauchen , empfinden sie wegen des Nikotinimpfstoffs kein Vergnügen mehr dabei , und das hilft ihnen , die Gewohnheit abzulegen “ , erläutert er .
Britische Wissenschaftler sagten , die Ergebnisse seien interessant , warnten aber gleichzeitig , es sei noch weitere Forschung notwendig .
Tripodi bestreitet , von Obeid beeinflusst worden zu sein
Gegen den früheren Minister der Labor @-@ Partei Joe Tripodi aus New South Wales wird eine Ermittlung durch die staatliche Korruptionsaufsicht eingeleitet .
Der ehemalige NSW @-@ Minister bestreitet , die Regelungen zur Maritimverpachtung auf Bitte seines politischen Mentors Eddie Obeid geändert zu haben , der verdeckte Beteiligungen an drei Grundstücken auf staatlich kontrolliertem Land besaß .
Die Independent Commission Against Corruption ( ICAC Unabhängige Kommission gegen Korruption ) hat am Freitag ihre Untersuchungen zur Frage ausgeweitet , ob Obeid verschiedene Staatsminister dahingehend beeinflusst hat , Pachtverträge am Circular Quay , wo die Obeids zwei Restaurants und ein Café betrieben , ohne Ausschreibung nach deren Auslaufen im August 2005 zu verlängern .
Jetzt wird wegen der Anschuldigung ermittelt , Tripodi habe von Obeids verdecktem Interesse an den Grundstücken gewusst , nachdem Tripodis frühere stellvertretende Stabschefin Lynne Ashpole am Donnerstag entsprechend ausgesagt hatte .
In jahrelangen Gesprächen , die 2005 begannen , hatte die Regierung auf öffentliche Ausschreibungen für die Pachtverträge gedrängt .
Die Pächter waren dagegen und wollten zudem längere Laufzeiten .
2009 wurden die Pachtverträge für die Unternehmen am Circular Quay , die den Obeids jährlich 2,5 Millionen Dollar einbrachten , ohne öffentliche Ausschreibung verlängert .
Tripodi , der von Februar 2006 bis November 2009 Hafenminister war , hatte sich ursprünglich für öffentliche Ausschreibungen ausgesprochen .
Doch er stritt ab , die Änderungen auf Bitten von Obeid vorgenommen zu haben , der , wie Tripodi bestätigte , auf eine Umgestaltung der Pachtregelungen der Regierung gedrängt hatte .
Eine der ICAC vorgelegte Telefonniederschrift zeigte Gespräche aus dem August und September 2007 zwischen Obeid , Tripodi und Steve Dunn , einem leitenden Beamten , der ins Hafenministerium gewechselt war , nachdem er unter Obeid in der Fischereibehörde gearbeitet hatte .
„ War das in diesen Telefongesprächen besprochene Thema die Ausarbeitung der kommerziellen Verpachtungsregelungen ? “ , fragte das stellvertretende Kommissionsmitglied Anthony Whealy Tripodi .
„ Nein “ , antwortete Tripodi .
Ich kann mich nicht erinnern , was besprochen wurde , aber das war es definitiv nicht .
Definitiv nicht zwischen mir und Herrn Obeid .
Israelische Kampfflugzeuge greifen Ziel in Syrien an , so offizielle Quellen
Israelische Jagdflugzeuge hätten Donnerstagnacht ein Ziel im syrischen Hafen Latakia angegriffen , bestätigte ein leitender Regierungsmitarbeiter gegenüber Fox News .
Der Beamte erläuterte nicht , was das Ziel gewesen sei , sagte aber , es sei mindestens eines gewesen .
Laut Associated Press handelte es sich bei dem Ziel um russische SA @-@ 125 @-@ Raketen .
Mindestens zweimal hat Israel dieses Jahr schon Luftschläge auf Raketenlieferungen in Syrien durchgeführt .
Ausländische Arbeitnehmer mit 457 @-@ Visa könnten „ Echtheitstest “ unterzogen werden
Die Regierung denkt im Rahmen erweiterter Maßnahmen über einen „ Echtheitstest “ für ausländische Arbeitnehmer mit 457 @-@ Visum nach .
Sollte der Test eingeführt werden , käme er über ein Kriterium zum Einsatz , das verhindern soll , dass das 457 zur Besetzung unqualifizierter Arbeitsplätze oder als Hintertür für den Zuzug von Familie und Freunden nach Australien benutzt wird .
Heute wurde ein Diskussionsvorschlag der Regierung veröffentlicht , nachdem die frühere Abgeordnete der Labor @-@ Partei , Maxine McKew , die Kommentare der Regierung im Hinblick auf ausländische Arbeitnehmer verurteilt hatte , weil diese von den Nachbarn Australiens als Beleidigung aufgefasst werden könnten .
„ Lautstarke Erklärungen wie , Ausländer sollen sich hinten anstellen ‘ und , Australier zuerst einstellen ‘ sind ein sehr unangenehmer Rückfall in Zeiten , in denen Gewerkschaften einen geschützten Arbeitsmarkt forderten “ , sagte sie dem Australia India Institute heute .
Historisch betrachtet hieß das , dass weiße Arbeitskräfte geschützt werden sollten – und wenn manche in der Region ein Echo dieses historischen Artefakts vernähmen , würde mich das nicht wundern .
Der Diskussionsvorschlag umreißt zwölf Maßnahmen , die einst vom ehemaligen Einwanderungsminister Chris Bowen angedacht wurden .
Einwanderungsminister Brendan O &apos; Connor , der gestern zu Gesprächen über Menschenschmuggel in Sri Lanka weilte , hat fünf der empfohlenen Änderungen umgesetzt , die anderen werden noch erwogen .
Wenn das „ Echtheitskriterium “ übernommen wird , dann könnte jemand , der ein Visum beantragt , dahingehend überprüft werden , ob „ der Antrag in den Fällen echt ist , in denen der Antragsteller mit dem Inhaber oder einer relevanten Person des unterstützenden Unternehmens verwandt oder persönlich verbunden ist . “
Firmen könnten außerdem verpflichtet werden , Rechenschaft über die Anzahl der 457 @-@ Visumsinhaber abzulegen , nachdem in der Vergangenheit Unternehmen , die zunächst nur eine kleine Anzahl von Arbeitern unterstützen wollten , schließlich Hunderte eingestellt haben .
Unterdessen starb ein 35 @-@ jähriger sri @-@ lankischer Asylant vermutlich an einem Herzinfarkt , nachdem er diese Woche mit einem Flüchtlingsboot auf der Weihnachtsinsel angekommen war .
Der verstörte neunjährige Sohn des Mannes , der mit ihm nach Australien gekommen war , wird seit dem Tod seines Vaters am Mittwoch von einem erwachsenen Cousin betreut , der ebenfalls auf dem Boot war .
Australische Behörden brachten den Mann in das Christmas Island Hospital , wo er starb .
Von der britischen Regierung wurde eine Studie angekündigt , die die Vorteile des HS2 @-@ Eisenbahnprojekts für Schottland erhöhen soll .
In der Arbeit von HS2 Ltd wird vorgeschlagen , schon mit Beginn von Phase 1 im Jahr 2026 Hochgeschwindigkeitsverbindungen zwischen Schottland und dem Norden Englands zu verwirklichen .
Verkehrsministerin Baroness Kramer sagte , das Projekt „ wird Großbritannien näher zusammenbringen “ .
Der schottische Verkehrsminister Keith Brown erklärte , er sei sehr erfreut , mit der britischen Regierung an diesem Plan zu arbeiten .
Phase 1 besteht aus einer neuen Hochgeschwindigkeits @-@ Bahnverbindung zwischen London und den West Midlands .
Nach Abschluss von Phase 2 wird es Verbindungen nach Manchester und Leeds geben .
Im Juni korrigierte die Regierung die geschätzten Kosten für den Bau der Hochgeschwindigkeitstrasse zwischen London und Nordengland von 32,7 Mrd. Pfund auf 42,6 Mrd. Pfund .
Die britische Regierung , die in Gesprächen mit Transport Scotland steht , hat HS2 Ltd beauftragt , nach weiteren Streckenkapazitäten und Reisezeitverbesserungen für Nordengland und Schottland zu suchen .
Dazu gehört die Möglichkeit einer Reisezeit von letztendlich drei Stunden oder weniger von Glasgow und Edinburgh nach London .
Baroness Kramer sagte : „ Unser Ziel für HS2 ist ein wirklich nationales Streckennetz , das Großbritannien und seine Städte näher zusammenbringt . “
Wir gehen mit HS2 voran , weil es enorme Vorteile mit sich bringt .
Ohne es stehen wir vor einer Kapazitätskrise in unserem Bahnnetz .
Doch es geht auch um die Verbindung zwischen 18 britischen Städten , einschließlich Glasgow und Edinburgh , die dank HS2 verbessert wird .
Der schottische Staatssekretär Alistair Carmichael kommentierte : „ Die heutige Ankündigung ist eine gute Nachricht für Schottland . “
Im Namen der schottischen Regierung forderte Keith Brown Carmichael auf , sich „ unmissverständlich “ für die schottische Einbindung in das HS2 @-@ Netzwerk einzusetzen .
Brown sagte : „ Die Hochgeschwindigkeits @-@ Bahnverbindung birgt das Potenzial enormer wirtschaftlicher Vorteile für Schottland , gleichzeitig liefert aber auch die Wirtschaftskraft Schottlands ein Argument für schnelle Bahnverbindungen in ganz Großbritannien . “
Deshalb sind wir erfreut , als Partner der britischen Regierung zu arbeiten und die Optionen für eine Hochgeschwindigkeits @-@ Bahnverbindung in Schottland zu untersuchen , die Vorteile für alle schafft und die Verbindung Glasgow @-@ Edinburgh ergänzt , die die schottische Regierung bereits plant .
Ich freue mich darauf , den Untersuchungsbericht mit den britischen Ministern im nächsten Jahr zu prüfen und gemeinsam die nächsten Schritte zu beschließen .
Vorschriften zu elektronischen Geräten in Flugzeugen bleiben in Australien vorläufig in Kraft
Australische Flugpassagiere müssen auch weiterhin Tablets und Smartphones bei Start und Landung abschalten , trotz Bemühungen in den USA , die Regelungen für derartige Geräte zu lockern .
Die US @-@ amerikanische Federal Aviation Administration ( FAA ) ermöglicht US @-@ Fluggesellschaften , ihre Vorgaben zu ändern , sodass Passagiere auf ihren Geräten während kritischer Flugphasen E @-@ Books lesen , Videos sehen oder spielen können , sofern diese sich im „ Flugmodus “ befinden .
Während des Großteils des Flugs ist Passagieren dies bereits erlaubt , doch finden es viele Leute ärgerlich , dass sie beim Start und der Landung ihre E @-@ Books nicht lesen dürfen .
Australische Gesellschaften beobachten die Entscheidung , zu deren Umsetzung die US @-@ amerikanischen Fluggesellschaften Unmengen an Arbeit erledigen müssen , verfolgen jedoch keine unmittelbare Pläne zur Änderung ihrer Vorschriften .
Die Flugsicherungsbehörde CASA erklärte ebenfalls , man werde sich die Ankündigung ansehen , betonte aber , dass die Einschränkungen bei der Nutzung elektronischer Geräte in kritischen Flugphasen in Australien nach wie vor gelten .
„ Die CASA hat derzeit keine spezifischen Regelungen hinsichtlich des Gebrauchs elektronischer Geräte im Flugzeug “ , wurde verlautbart .
Das Thema unterliegt Bestimmungen , denen zufolge Fluggesellschaften die Sicherheit jederzeit aufrechterhalten und Passagiere die vom Kabinenpersonal gegebenen Sicherheitsanweisungen befolgen müssen .
Virgin hat bereits mit der CASA Gespräche über eine Nutzungsausweitung seines Wi @-@ Fi @-@ Unterhaltungssystems auf Flügen geführt und erklärt , man sei offen für Veränderungen , diese müssten aber vom Gesetzgeber initiiert werden .
„ Wir würden eine Überprüfung der Zulassung elektronischer Geräte durch die CASA begrüßen , denn wir sind überzeugt , dass dies das Kundenerlebnis verbessern würde , nachdem wir nun ( drahtlose Unterhaltung ) während des Flugs anbieten “ , sagte ein Sprecher .
Qantas erklärte , man werde bis auf Weiteres bei den aktuellen Vorschriften bleiben .
„ Unsere derzeitigen Richtlinien sehen vor , dass elektronische Geräte beim Start und der Landung nicht verwendet werden dürfen , und wir haben zurzeit keine Pläne , das zu ändern “ , erklärte das Unternehmen .
Die FAA @-@ Regelungen gelten für US @-@ amerikanische Fluggesellschaften .
Wir sind allerdings immer an Entwicklungen bei Regelungen interessiert , von denen Passagiere profitieren können , und werden uns die FAA @-@ Entscheidung sowie die Gründe dahinter sicherlich genau ansehen .
Die Entscheidung wirkt sich bei US @-@ amerikanischen Gesellschaften je nach Alter der Flotte unterschiedlich aus .
Sie müssen nachweisen , dass ihre Flugzeuge die Funkstörungen durch Mobilgeräte tolerieren können , und Handbücher , Schulungsmaterialien , Handgepäck @-@ Programme sowie Kundenunterweisung ändern .
„ Nachdem eine Fluggesellschaft die Toleranz ihrer Flotte bestätigt hat , kann sie Passagieren das Verwenden tragbarer , leichter elektronischer Geräte wie Tablets , E @-@ Book @-@ Lesegeräte und Smartphones in jeder Höhe erlauben “ , gab die FAA bekannt .
In seltenen Fällen bei schlechter Sicht wird die Crew die Passagiere anweisen , während der Landung die Geräte abzuschalten .
Die Gruppe empfahl außerdem , schwerere Geräte bei Start und Landung sicher unter dem Sitz oder in den Fächern über den Sitzen zu verstauen .
Vor dem Revierderby gegen Schalke hatten mitgereiste BVB @-@ Anhänger mit Leuchtraketen für hässliche Szenen in der Veltins @-@ Arena gesorgt .
Borussia Dortmund kündigte daraufhin harte Konsequenzen an .
Vor dem Freitagsspiel der Fußball @-@ Bundesliga gegen den VfB Stuttgart reagierten die Ultras mit einem Schweigen - zunächst .
Es war eine ungewohnte , fast schon gespenstische Akustik , die sich dem Betrachter bis kurz vor dem Anpfiff des Bundesligaspiels zwischen dem deutschen Vizemeister Borussia Dortmund und dem VfB Stuttgart im Signal Iduna Park bot .
Zu hören waren überwiegend die Gästefans mit ihren Gesängen .
Die Südtribüne dagegen , wo die treuesten der treuen - und lautesten - BVB @-@ Fans stehen , präsentierte sich zunächst außergewöhnlich leise : Keine Gesänge , keine Schlachtrufe .
Das Podest des Capo , der sonst die gemeinsame Anfeuerung koordiniert , blieb unbesetzt .
Und ganz vorne auf der Tribüne wehte einsam eine große Fahne mit Aufschrift &quot; Sektion Stadionverbot &quot; .
Nur als Torhüter Roman Weidenfeller wie immer als erster BVB @-@ Spieler den Platz betrat , brandete kurzzeitiger Jubel auf .
Als seine Mannschaftskollegen folgten , gab es lautstarken Gesang und wehende Schals - aber längst nicht überall .
In den zentralen Blöcken 12 und 13 der Südtribüne regte sich nichts .
Auch dass Stadionsprecher Norbert Dickel noch einmal die positiven Erlebnisse der letzten Tage - Derbysieg , Sieg über Arsenal , Vertragsverlängerung von Trainer Jürgen Klopp - aufzählte , sorgte nicht für Feierlaune .
Erst fünf Minuten vor dem Anpfiff erklomm der Capo sein Podest - und die bis dahin geradezu mit Händen greifbare Anspannung entlud sich in einem lauten Schrei , als Dickel wie gewohnt die Stimmung auf den Rängen im Stadion abfragte .
Als letztes war wie immer die Südtribüne an der Reihe - und endlich war hier wieder wie gewohnt der lauteste Ort im Stadion .
Und spätestens als mit Anpfiff von der Südtribüne die lautstarke Aufforderung &quot; Derbysieger steht auf &quot; kam , war wieder alles wie immer .
Das Schweigen zuvor war wohl eine Reaktion auf die Geschehnisse der vergangenen Tage .
Unmittelbar vor Revierderby beim FC Schalke 04 hatten einige der mitgereisten BVB @-@ Anhänger Leuchtraketen in die Zuschauerränge und auf den Platz gefeuert - und dabei fast Torhüter Roman Weidenfeller getroffen .
Das Spiel wurde wegen der chaotischen Szenen verspätet angepfiffen .
BVB @-@ Boss Hans @-@ Joachim Watzke hatte die Spitzen der Dortmunder Ultras daraufhin in seinem Büro empfangen - und glaubt man Watzkes Worten , war dies für die Fanvertreter ein eher ungemütlicher Termin .
&quot; Es wird für die gesamte Ultrabewegung massive Einschnitte geben &quot; , verkündete der BVB @-@ Boss am Donnerstagabend auf einer Podiumsdiskussion in Frankfurt .
Als Sofortmaßnahme untersagte Watzke den Ultras eine Choreographie für das Heimspiel gegen den VfB Stuttgart .
&quot; Das habe ich verboten &quot; , erklärte er .
Die Null @-@ Toleranz @-@ Politik in Sachen Pyrotechnik können wir nicht aufgeben .
Zudem wurden den Ultras verschiedene Möglichkeiten einer Bestrafung aufgezeigt - bis zum Dienstag haben diese nun Zeit , sich für eine zu entscheiden .
Andernfalls , so Watzke , werde der BVB bis Ende der kommenden Woche eine Sanktion festlegen .
&quot; Das wird einschneidend &quot; , versicherte Watzke .
Man darf gespannt sein , wie die Reaktionen auf der Südtribüne dann ausfallen .
Pfandhäuser boomen in Singapur , da die Krise in der Mittelschicht angekommen ist
In einem Pfandhaus im Einkaufszentrum Bendemeer in Singapur tauscht Janani Amirthalinga einen goldenen Armreif , einen Ring und ein Paar Ohrringe ein , um die Schulgebühren ihrer Töchter bezahlen zu können .
„ Mein Ehemann und ich haben gerade ein Haus gekauft , da steckt mein ganzes Geld drin “ , sagt Amirthalinga .
Obwohl sie jeden Monat 3.000 Singapur @-@ Dollar ( ca 1.730 Euro ) als Verwaltungsmitarbeiterin verdiene und ihr Mann auch arbeite , reiche das monatliche Familieneinkommen nicht aus , erläutert sie .
Tatsächlich ist die Nachfrage in Teilen Südostasiens – wo die Verschuldung der Haushalte zunimmt – so groß , dass ValueMax , wo sie ihren Tausch vorgenommen hat , diese Woche das dritte Pfandhaus wurde , das an der singapurischen Börse gelistet ist .
Das Verpfänden von Schmuck ist nicht nur ein schneller Weg , um Geld zu bekommen – 1.300 Singapur @-@ Dollar im Fall von Janani Amirthalinga – , sondern auch fast so günstig wie ein ungesichertes Bankdarlehen .
Typischerweise verlangen Pfandhäuser in Singapur einen effektiven Jahreszins von 17 Prozent , der nur knapp über den 15,4 Prozent liegt , die die United Overseas Bank verlangt , ein lokaler Kreditgeber mit einer Filiale im selben Einkaufszentrum .
Pfandhäuser bieten aber den Vorteil , dass hier keine Überprüfung der Kreditwürdigkeit oder Einkommensnachweise erforderlich sind , weshalb Darlehen schneller als bei Banken möglich sind .
Aus diesem Grund wenden sich Millionen von Menschen in der Region an Pfandhäuser , nachdem Familien den Druck durch steigende Lebenshaltungskosten sowie eine zunehmende Haushalts- und Verbraucherverschuldung spüren .
Nach fünf Jahren robusten Wachstums seit der globalen Finanzkrise und billigen Krediten aufgrund einer lockeren Finanzpolitik in den entwickelten Wirtschaftsräumen suchen Familien mit geringeren und mittleren Einkommen Pfandhäuser auf , um so bei stotternder Wirtschaft den Unterschied auszugleichen .
Diese Woche bezeichnete die Rating @-@ Agentur Standard &amp; Poor &apos; s wachsende Haushaltsverschuldung , hauptsächlich durch steigende Hypotheken , als einen Risikofaktor für die Kreditwürdigkeit asiatischer Banken .
Malaysia , Thailand und Singapur haben nach Einschätzung der Agentur die höchste Haushaltsverschuldung in Asien im Verhältnis zum Bruttoinlandsprodukt .
Malaysia steht mit 80 Prozent des BIP an der Spitze der Liste , ein Anstieg von 60 Prozent noch im Jahr 2008 .
Volkswirtschaftler sorgen sich auch wegen der hohen Verbraucherverschuldung in Thailand , das diese Woche knapp aus einer technischen Rezession herausgekommen ist .
Am Donnerstag zeigten die Daten eine weiterhin bestehende Exportschwäche und ein Nachlassen der Verbrauchernachfrage .
„ Im Endeffekt bedeutet das , dass angesichts steigender Kosten die Menschen im mittleren bis unteren Segment ( der Einkommensskala ) versuchen werden , ihr Einkommen zu ergänzen , wo immer das möglich ist “ , sagt Song Seng Wun , Ökonom bei CIMB , einer malaysischen Bank .
Historische Höchststände bei den Goldpreisen in den letzten zwei Jahren haben den Trend zur Verpfändung persönlicher Gegenstände noch verstärkt , da die Menschen die Gelegenheit nutzen , den Schmuck der Familie in Bargeld zu verwandeln .
In Singapur sind etwa 70 Prozent der verpfändeten Gegenstände in den 200 Pfandhäusern des Stadtstaats Gold .
Die Leute sagen sich : „ Der Goldpreis sieht gut aus , lasst uns Großmutters Goldkette verpfänden und nächsten Monat zurückholen . “
Der größte thailändische Pfandhausbetreiber , EasyMoney , hat in seinen Filialen einen 20 @-@ prozentigen Kundenzuwachs in den letzten Monaten erlebt .
Das Wachstum im Pfandgeschäft ist so stark , dass ValueMax , Betreiber der Filiale in Bendemeer und 15 weiterer in Singapur , nicht nur in das benachbarte Malaysia expandieren möchte – wo das Unternehmen vier Häuser betreibt – , sondern auch außerhalb Asiens , so Yeah Lee Ching , Geschäftsführerin von ValueMax .
Das Unternehmen finanziert das mit 60 Prozent der 66 Millionen Singapur @-@ Dollar , die es diese Woche mit dem Börsengang in Singapur einnahm .
Während einige Kreditgeber wegen hoher Zinssätze ins Kreuzfeuer geraten seien , erklärt Yeah , dass Pfandhäuser nicht nur günstigere Zinsen als andere Verleiher böten , sondern auch nicht direkt die Schulden erhöhten .
„ Kunden beleihen Gegenstände , die sie bereits besitzen , und das Verflüssigen persönlicher Wertgegenstände vergrößert nicht die Haushaltsverschulung “ , erläutert sie .
Das Pfandleihgeschäft wird gesellschaftlich zunehmend als kurzfristige , abgesicherte Finanzierung akzeptiert .
Auch sind nicht alle Menschen , die Pfandleihe nutzen , in finanziellen Schwierigkeiten .
Reiche Leute aus Singapur kommen auch in die Filialen von ValueMax , um Goldbarren und Rolex @-@ Uhren zu verpfänden , wofür sie bis zu 60 Prozent des Kaufpreises in bar erhalten .
Zu uns kommen Kunden aus jeder sozialen Schicht .
„ Dazu gehören Wohlhabende , die kurzfristig etwas für ein Geschäft oder eine Investition leihen , oder kleine Unternehmen , die Engpässe im Cash @-@ Flow überbrücken müssen “ , sagt Yeah .
Manchmal brauchen sie auch einfach nur sehr schnell Geld .
NSA saugt Daten von Google und Yahoo ab - Snowden will helfen
Der Geheimdienst @-@ Enthüller Edward Snowden hat prinzipielles Interesse , Deutschland bei der Aufklärung der immer brisanter werdenden NSA @-@ Spähaffäre zu helfen .
Nach Darstellung des Grünen @-@ Bundestagsabgeordneten Hans @-@ Christian Ströbele ging es bei seinem überraschenden Treffen mit Snowden in Russland darum , unter welchen Bedingungen der Ex @-@ Geheimdienstmitarbeiter bei einer deutschen Staatsanwaltschaft oder vor einem Untersuchungsausschuss aussagen würde .
Snowden habe auf seine komplizierte juristische Situation verwiesen , sagte Ströbele dem ARD @-@ Magazin &quot; Panorama &quot; .
Rettungspaket über 325 Millionen australische Dollar für tasmanisches Gesundheitswesen
Die australische Regierung besteht auf den harten Bedingungen , die mit dem Rettungspaket über 325 Millionen australische Dollar für das tasmanische Gesundheitswesen verknüpft sind , um sicherzustellen , dass die Regierung des Bundesstaates das Geld nicht verschwenden kann .
Bundesgesundheitsministerin Tanya Plibersek hat angekündigt , der Commonwealth werde „ unverzügliche Maßnahmen “ ergreifen , um eine Krise abzuwenden , die durch eine alternde Bevölkerung des Inselstaats , eine höhere Quote an chronischen Erkrankungen und Systemeinschränkungen verursacht worden sei .
Die Finanzierung für einen Zeitraum von vier Jahren wurde nach Regierungsberatungen mit dem unabhängigen tasmanischen Abgeordneten Andrew Wilkie beschlossen .
„ Die Regierung hat ein Notfallrettungspaket geschnürt , das unserer Ansicht nach die einzigartigen Herausforderungen angeht , denen sich der Bundesstaat gegenüber sieht “ , erklärte Plibersek heute .
Das 325 @-@ Millionen @-@ Dollar @-@ Paket umfasst 31 Millionen Dollar Soforthilfe für Wahlleistungen .
Durch weitere 2600 Operationen , einschließlich orthopädischer Eingriffe und Behandlungen wegen grauem Star , sollen Rückstände beseitigt werden .
Darüber hinaus gibt es Geld für Tageskliniken in Hobart und Launceston , bessere Nachsorge nach stationären Aufenthalten , die Facharztausbildung , Dienstleistungen im Bereich psychische Gesundheit und die Einführung eines Systems zur elektronischen Aufzeichnung von Gesundheitsdaten in lokalen Krankenhäusern .
„ Diese Investitionen entsprechen den Ideen , von denen mir betroffene Klinikmitarbeiter gesagt haben , sie seien die beste Möglichkeit , das tasmanische Gesundheitssystem zu verbessern “ , sagte Tanya Plibersek .
Die Ministerin bestand auf einer strengen Berichts- und Rechenschaftspflicht der tasmanischen Regierung .
Der Bundesstaat müsse das aktuelle Finanzierungsniveau beibehalten , um Geld aus dem Commonwealth erhalten zu können , und monatlich darüber berichten , wo die zusätzlichen Gelder ausgegeben wurden .
Eine dreiköpfige Kommission wird eingerichtet und soll sicherstellen , dass der Bundesstaat Gesundheitsdienste so effektiv und effizient wie möglich bereitstellt .
Wie Wilkie heute erklärte , würden die 325 Millionen Dollar nur wenig nützen , wenn „ sie nicht von echten Reformen begleitet werden , die das öffentliche tasmanische Gesundheitssystem auf einen nachhaltigeren Kurs bringen . “
Dessen ungeachtet lobte er die Regierung dafür , dass sie auf seine Bitte um dringende Hilfe reagiert habe , die er zuerst gegenüber dem Premierminister Anfang Mai zum Ausdruck gebracht habe .
„ Ich bin zuversichtlich , dass die Bundeshilfen einen großen Beitrag dazu leisten werden , das öffentliche Gesundheitssystem des Bundesstaates von der Sorgenliste zu nehmen “ , sagte Wilkie .
Laut der Regierung des Bundesstaates werden diese Wahlleistungen weitgehend die kürzlichen Einschnitte wettmachen .
Doch der gesundheitspolitische Sprecher der Opposition auf Bundesebene , Peter Dutton , ist der Ansicht , die heutige Ankündigung sei nur eine „ Pflasterlösung “ .
„ Wir sind deshalb in der heutigen Lage , weil die Labor @-@ Staatsregierung 430 Millionen Dollar aus dem Gesundheitssystem abgezogen hat “ , sagte er gegenüber ABC TV .
Es kann nicht sein , dass eine Staatsregierung beinahe eine halbe Milliarde Dollar aus dem System reißt und der Commonwealth 300 Million hineinsteckt und dann so tun , als seien das gute Nachrichten .
Dutton forderte Plibersek auf zu garantieren , dass nicht ein einziger Dollar des Rettungspakets für zusätzliche Bürokratie ausgegeben werde .
Guillaume Nicloux &apos; Adaption des Romans von Denis Diderot überzeugt mit außergewöhnlicher Produktionsausstattung und zeitgenössischen Details , ist allerdings auch schwerere Kost als nötig .
Die im Frankreich der 1760er Jahre spielende Handlung erzählt die ergreifende Geschichte von Suzanne , einer jungen Adligen , die von ihrer Familie ins Kloster geschickt wird .
Als sie rebelliert , ist sie mit der extremen Grausamkeit einer äußerst sadistischen Oberin konfrontiert und wird zum Objekt erotischer Faszination einer anderen .
Der Film gleitet niemals ab in Lüsternheit oder Sensationslust – und darin liegt sein Problem .
Der feierliche Ernst , mit dem der Film erzählt wird , macht ihn auch für das Publikum zum quälerischen Büßerhemd .
Syrien hat seine Möglichkeit zur Herstellung von Chemiewaffen zerstört , so eine Überwachungsgruppe
Syrien habe wichtige Einrichtungen zur Herstellung von Chemiewaffen und Gitftgasmunition zerstört , erklärte die globale Überwachungsgruppe für Chemiewaffen am Donnerstag , während es im Norden des Landes zu schweren Zusammenstößen in der Nähe eines der Standorte kam , an denen mutmaßlich giftige Substanzen gelagert werden .
Ebenfalls am Donnerstag verkündete eine syrische Aktivistengruppe , dass mehr als 120.000 Menschen seit Beginn des Bürgerkrieges vor nun schon bald drei Jahren getötet worden seien .
Die Ankündigung der Organisation für das Verbot chemischer Waffen ( OPCW ) kam einen Tag vor dem Termin am
1. November , den die in Den Haag ansässige Organisation Damaskus gesetzt hatte , um alle Einrichtungen zur Herstellung von Chemiewaffen zu zerstören oder „ inoperabel “ zu machen , einschließlich aller Maschinen für das Mischen von Chemikalien zu Giftgas und das Befüllen von Munition .
Der Abschluss dieses Vorgangs , der im Grunde genommen die erste Stufe der Zerstörung darstellt , ist ein wichtiger Meilenstein eines ambitionierten Zeitplans , der auf die Vernichtung aller Chemiewaffen Syriens bis Mitte 2014 abzielt .
Die Zerstörung der Einrichtungen bedeutet , dass Syrien keine neuen Chemiewaffen mehr produzieren kann .
Damaskus muss allerdings noch damit beginnen , die vorhandenen Waffen und Vorräte zu vernichten .
Annahmen zufolge gibt es im Land etwa 1.000 Tonnen an Chemikalien und Waffen , wozu auch Senfgas und das Nervengas Sarin zählen .
Die Ankündigung kam zu einer Zeit , als am Donnerstag Kämpfe in der Stadt Safira stattfanden , von der Experten sagen , dass es hier eine Produktionseinrichtung für Chemiewaffen sowie Lagerstätten gebe , wie die in Großbritannien ansässige Syrische Beobachtungsstelle für Menschenrechte mitteilte .
Die Aktivistengruppe , die über ein Netzwerk von Aktivisten in Syrien die Zahl der Toten verfolgt , erklärte am Donnerstag , 120.296 Menschen seien gestorben .
Davon seien 61.067 Zivilisten , einschließlich 6.365 Kinder .
Auf Seiten der Regierung gehörten 29.954 von ihnen der Armee von Präsident Bashar Assad an , 18.678 seien regierungsfreundliche Kämpfer und 187 libanesische Hisbollah @-@ Milizen .
Ebenfalls unter den Toten seien 2.202 desertierte Armeesoldaten und 5.375 Kämpfer der Opposition , viele von ihnen Ausländer .
Am 25. Juli schätzten die UN die Zahl der Toten in diesem Konflikt seit März 2011 auf 100.000 .
Diese Zahl wurde bisher nicht aktualisiert .
Der Konflikt hat etwa zwei Millionen Menschen zur Flucht aus dem Land gezwungen .
Assads Truppen kämpfen seit Wochen in Safira gegen die Rebellen , von denen viele Verbindungen zu al @-@ Qaida @-@ Gruppen haben .
Die Beobachtungsstelle sagte , es habe am Donnerstag Verluste auf beiden Seiten gegeben , nannte aber keine Details .
Die Kämpfe unterstreichen die Gefahr , der die Chemiewaffeninspektoren ausgesetzt sind , denn ihre Mission zur Befreiung Syriens von seinem giftigen Waffenarsenal ist ein Rennen gegen die Zeit inmitten eines tobenden Bürgerkriegs .
Nach Aussage der OPCW , die eng mit den Vereinten Nationen zusammenarbeitet , sei das Team „ nun überzeugt , dass es alle von Syrien genannten wichtigen Produktions- und Misch- / Befüllungseinrichtungen gesehen und ihre Zerstörung miterlebt hat . “
Deshalb „ sind derzeit keine weiteren Inspektionsaktivitäten geplant . “
Anfang der Woche hatten die Inspektoren erklärt , sie hätten die erste Runde der Überprüfungen abgeschlossen und 21 von 23 der von Damaskus angegebenen Stätten besucht .
Wegen Sicherheitsbedenken sei der Besuch zweier Einrichtungen nicht möglich gewesen , sagten die Inspektoren .
Am Donnerstag erklärte die OPWC , die beiden Standorte seien laut syrischer Aussage „ aufgegeben worden ... und die dort vorhandenen Objekte des Chemiewaffenprogramms seien an andere genannte Einrichtungen verlagert worden , die inspiziert wurden . “
Es war nicht sofort klar , ob die Stätte in Safira eine der beiden Einrichtungen war , die die OPCW @-@ Inspektoren nicht besuchen konnten .
Syrien hat einen Plan für die komplette Zerstörung seiner Chemiewaffen vorgelegt , der nächsten Monat vom Exekutivkomitee des OPWC genehmigt werden muss .
„ Ich ziehe den Hut vor der Tapferkeit und dem Mut , den Sie alle beim Erfüllen der herausforderndsten Mission , die je von dieser Organisation ausgeführt wurde , gezeigt haben “ , erklärte Ahmed Uzumcu , der Generaldirektor der Überwachungsorganisation in einem von OPCW veröffentlichten Kommentar .
Seit inzwischen drei Jahren kämpfen die hauptsächlich sunnitischen Muslimrebellen in diesem Bürgerkrieg gegen Assads Regierung und ihre Sicherheitskräfte , der viele Mitglieder der Alawiten angehören , einer Abspaltung des schiitischen Islam .
Im Hinblick auf weitere Entwicklungen sagte der Leiter der Beobachtungsgruppe , Rami Abdurrahman , es habe am Mittwoch eine starke Explosion in einer Luftverteidigungseinrichtung in der syrischen Küstenprovinz Latakia gegeben .
Die Ursache der Explosion sei nicht bekannt , erklärte er .
Zorn über Urteil für Bombenleger von Bali
Überlebende und Verwandte der 202 Menschen , die 2002 bei dem Bombenanschlag in Bali ums Leben gekommen waren , reagierten verärgert über das Urteil für den letzten der Anstifter , der vor Gericht gestellt wurde , da Umar Patek ihrer Ansicht nach standrechtlich erschossen werden sollte .
Patek , der knapp zehn Jahre als eine der meistgesuchten Personen Südostasiens auf der Flucht war , wurde gestern für seine Rolle beim Bau von Sprengkörpern für den Bombenanschlag zu einer Haftstrafe von 20 Jahren verurteilt .
Mit Strafaussetzung könnte er nach 15 Jahren entlassen werden .
Der 45 @-@ jährige wurde des Massenmords für schuldig befunden wegen des Angriffs auf zwei Nachtclubs im beliebten Touristenviertel von Kuta , bei dem 202 Menschen starben , darunter 88 Australier , und viele weitere verletzt wurden .
Ein Schuldspruch erfolgte außerdem in einer Reihe terrorismusbezogener Anklagepunkte , wozu eine Welle von Sprengstoffanschlägen auf Kirchen in Indonesien an Heiligabend im Jahr 2000 zählten .
Die Staatsanwaltschaft hatte eine lebenslange Haftstrafe gefordert , auch wenn sie für den Mann , der wegen seines Rufs als meisterlicher Bombenbauer auch als „ Demolition Man “ bezeichnet wird , die Todesstrafe hätte beantragen können .
Die Entscheidung hat schmerzhafte Erinnerungen bei June Corteen geweckt , einer Mutter aus Perth , die ihre 39 Jahre alten Zwillingstöchter Jane und Jenny in der von Patek und seinen Mitverschwörern vor fast zehn Jahren angerichteten Verwüstung verloren hat .
Mit Tränen kämpfend sagte sie , Patek hätte zum Tode verurteilt werden sollen .
Ich meine wirklich , er sollte in den Fußstapfen der anderen Kerle folgen .
„ Man sollte ihn vor ein Erschießungskommando stellen “ , sagte Corteen gegenüber AAP .
Ich muss jeden Tag damit leben , dass ich keine weiteren Enkel bekommen werde und ich meine Töchter nie mehr sehen werde .
Der Sari Club wurde dem Erdboden gleichgemacht , als am 12. Oktober 2002 kurz nach 23 Uhr eine gewaltige Bombe in einem Kleinlaster explodierte , der vor dem Nachtclub geparkt war .
Peter Hughes war in Paddy &apos; s Bar , wo nur 20 Sekunden früher ein Selbstmordattentäter einen mit Sprengstoff gefüllten Rucksack explodieren ließ .
Er fiel nach dem Anschlag einen Monat lang ins Koma und „ starb “ dreimal , während er an einem Lebenserhaltungssystem hing .
Hughes sagte , Patek habe dasselbe Schicksal verdient wie die drei anderen Mitglieder der Terrorzelle Jemaah Islamiah – Amrozi , Mukhlas und Imam Samudra – , die für das Blutbad verantwortlich waren und vor vier Jahren hingerichtet wurden .
Wirklich , dieser Typ sollte vor allen anderen die Todesstrafe bekommen .
Ihn am Leben zu lassen – nein , es gibt keinen Grund , ihn am Leben zu lassen .
20 Jahre zu bekommen , nachdem er 202 Menschen getötet und viele Hunderte verletzt hat , ist nicht viel .
Patek ist der letzte der Bali @-@ Bomber , der vor Gericht stand .
Er entzog sich beinahe ein Jahrzehnt der Festnahme , wurde aber schließlich im Januar 2011 in der pakistanischen Stadt Abbottabad aufgegriffen , wo US @-@ Streitkräfte knapp vier Monate später den früheren al @-@ Qaida @-@ Chef Osama bin Laden töteten .
Während der Verhandlung sagte ein FBI @-@ Agent aus , dass Geheimdienstberichte den Hinweis erbracht hätten , dass sich Patek in Pakistan befand , um bin Laden zu treffen mit dem Ziel , die Verbindung zwischen südostasiatischen Terrorgruppen und al @-@ Qaida wieder aufzubauen .
„ Er hat sich nicht gestellt “ , sagte Corteen .
Bis vor kurzem hat er keine Reue dafür gezeigt , wie viel Leid er anderen Menschen zugefügt hat .
Das Urteil erging vor dem zehnjährigen Jahrestag des Anschlags in diesem Jahr , der mit Gedenkfeiern in Bali und Australien begangen wird .
„ Es wird dieses Jahr viele Tränen geben “ , sagte Corteen .
Patek kann gegen sein Urteil noch Berufung einlegen .
FAA : Fluggäste können jetzt elektronische Geräte in Flugzeugen verwenden ( aber keine Handygespräche führen )
Flugreisende können jetzt vom Abflug bis zur Landung ihre elektronischen Geräte zum Lesen , Arbeiten , Spielen , Musik hören und dem Ansehen von Filmen verwenden , nicht aber mit dem Handy telefonieren , so die neuen Richtlinien , die am Donnerstag von der Federal Aviation Administration ( FAA ) in den USA herausgegeben wurden .
Doch sollten die Passagiere nicht erwarten , dass diese Änderungen sofort umgesetzt werden .
Wie schnell sie implementiert würden , hinge von der jeweiligen Fluggesellschaft ab , erklärte FAA @-@ Mitarbeiter Michael Huerta auf einer Pressekonferenz .
Die Fluggesellschaften müssen der FAA nachweisen , dass Flugzeuge den neuen Richtlinien entsprechen und dass sie die Schulungshandbücher des Flugpersonals sowie die Regelungen für das Verstauen der Geräte entsprechend der neuen Vorschriften aktualisiert haben .
Die FAA erklärte , sie habe bereits von einigen Fluggesellschaften Pläne erhalten , die den Einsatz tragbarer elektronischer Geräte in Flugzeugen ausbauen möchten .
Unter diesen Fluggesellschaften waren auch Delta und JetBlue .
„ Je nach Zustand des Plans könnten wir die erweiterte Nutzung elektronischer Geräte sehr bald genehmigen “ , gab die FAA in einer Verlautbarung bekannt .
Derzeit müssen Passagiere Smartphones , Tablets und andere Geräte abschalten , wenn die Flugzeugtüren geschlossen werden .
Sie dürfen sie erst dann wieder starten , wenn das Flugzeug eine Höhe von drei Kilometern erreicht hat und der Kapitän grünes Licht gibt .
Beim Eintritt in den Landeanflug müssen die Fluggäste sie wieder abschalten und dürfen sie nicht wieder starten , ehe das Flugzeug gelandet ist .
Nach den neuen Richtlinien könnten Fluggesellschaften , deren Flugzeuge gegen elektronische Störungen gesichert seien , ihren Passagieren erlauben , die Geräte auch bei Start , Landung und auf dem Rollfeld zu verwenden , erklärte die FAA .
Die meisten neuen Verkehrsflugzeuge und andere Flieger , die für die Verwendung von Wi @-@ Fi in größeren Höhen umgerüstet wurden , sollten den Kriterien entsprechen .
Laura Glading , Präsidentin des Berufsverbands professioneller Flugbegleiter , begrüßte die Änderungen .
„ Wenn die neue Regelung sicher umgesetzt ist – und wir arbeiten diesbezüglich eng mit der Fluggesellschaft zusammen – , werden beide Seite davon profitieren “ , kommentierte Glading .
Wir sind es ehrlich gesagt leid , uns bei diesem Thema wie Aufpasser fühlen zu müssen .
Dennoch blieben Internetverbindungen zum Surfen , Austauschen von E @-@ Mails , Textnachrichten oder Herunterladen von Daten unter drei Kilometern weiterhin verboten , erläuterte die Behörde .
Passagiere werden aufgefordert , Smartphones , Tablets und andere Geräte in den Flugmodus zu versetzen .
Also immer noch kein „ Words With Friends “ , das Scrabble ähnelnde Online @-@ Spiel , das der Schauspieler Alec Baldwin 2011 auf seinem Smartphone spielte , als er öffentlichkeitswirksam einen Jet von American Airlines verlassen musste , weil er sich weigerte , das Gerät abzuschalten , während das Flugzeug am Flugsteig geparkt war .
Und schwerere Geräte wie Laptops müssen auch weiterhin verstaut werden , da hier eine Verletzungsgefahr besteht , falls sie durch die Kabine fliegen .
Handygespräche während des Flugs bleiben ebenfalls weiterhin verboten .
Die Regulierungskompetenz für Telefongespräche liegt bei der Federal Communications Commission ( FCC ) , nicht bei der FAA .
FAA hebt möglicherweise Verbot für bestimmte elektronische Geräte bei Start und Landung auf
Letzten Monat sagte Mark Rosenker von der Verkehrssicherheitsbehörde National Transportation Safety Board , Sicherheitsexperte für nationale Verkehrsfragen auf CBS News , Handys würden noch immer als Risiko betrachtet .
„ Handy sind wirklich ein Problem , nicht nur weil sie potenziell Störungen bei Navigationsgeräten verursachen könnten , sondern weil wir von der FCC wissen , dass die Übertragung aus der Luft auch Sendemasten stören kann “ , so Rosenker .
Ein Beratungskomitee der Branche , das von der FAA zur Untersuchung dieses Themas ins Leben gerufen wurde , empfahl letzten Monat , dass die Regierung einen breiteren Einsatz persönlicher elektronischer Geräte erlaube .
In den letzten Jahren hat sich der Druck auf die FAA erhöht , Einschränkungen für den Gebrauch zu lockern .
Kritiker wie die demokratische Senatorin Claire McCaskill aus Missouri vertreten die Ansicht , es gebe keine gültigen Sicherheitsgründe für das Verbot .
Die Einschränkungen sind auch zunehmend schwerer durchzusetzen , weil die Nutzung der Geräte allgegenwärtig geworden ist .
In einigen Studien ist davon die Rede , das bis zu ein Drittel der Passagiere das Abschalten des Gerätes vergisst oder ignoriert .
Die FAA begann 1966 , die Nutzung elektronischer Geräte durch Flugreisende einzuschränken , nachdem Berichte über Störungen von Navigations- und Kommunikationsgeräten durch von Passagieren mitgeführte UKW @-@ Radios bekannt geworden waren , die damals den neuesten Techniktrend darstellten .
Neue Flugzeuge sind weitaus abhängiger von elektrischen Systemen als frühere Generationen von Luftfahrzeugen , aber sie sind auch so konstruiert und von der FAA genehmigt , dass ihnen elektronische Interferenzen nichts ausmachen .
Fluglinien bieten Passagieren schon seit einigen Jahren Wi @-@ Fi , wenn die Flughöhe erreicht ist .
Die an Wi @-@ Fi @-@ Systeme angepassten Flieger sind auch unempfindlicher gegenüber Interferenzen .
Die überwiegende Mehrheit der Passagierflugzeuge sollte für den stärkeren Gebrauch elektronischer Geräte nach den neuen Richtlinien geeignet sein , sagte Huerta .
Die heutigen elektronischen Geräte geben im Allgemeinen wesentlich weniger Funkstrahlung ab als frühere Generationen .
E @-@ Reader beispielsweise geben nur minimale Strahlung ab , wenn man umblättert .
Doch beim Herunterladen oder Senden von Daten sind die Übertragungswerte stärker .
Zu den Verfechtern einer Lockerung der Einschränkungen für die Gerätenutzung durch Passagiere zählt Amazon.com .
2011 luden Firmenmitarbeiter ein Passagierflugzeug voller Kindle E @-@ Reader und machten einen Testflug , um Probleme zu ermitteln , konnten aber keine feststellen .
Mitglieder des FAA @-@ Beratungskomitees äußerten gemischte Gefühle , was das Risiko bei der Nutzung von Geräten angeht .
Douglas Kidd vom Passagierverband National Association of Airline Passengers sagte , er sei der Ansicht , die Störung durch die Geräte sei echt , auch wenn das Risiko minimal sei .
Andere Komiteemitglieder sagten , es gebe nur vereinzelte Berichte von Piloten , die für eine Störung von Flugzeugsystemen durch die Geräte sprächen , und die meisten davon seien sehr alt .
Das Komitee empfahl der FAA allerdings , es Piloten zu erlauben , bei Instrumentenlandung unter schlechten Sichtverhältnissen das Abschalten der Geräte durch die Passagiere anzuordnen .
Eine Gruppierung aus der Reisebranche begrüßte die Änderungen und bezeichnete sie als vernünftige Anpassung für Reisende , die heute umfangreich mit Technik ausgestattet wären .
„ Wir freuen uns , dass die FAA erkennt , dass ein angenehmes Passagiererlebnis nicht im Widerspruch zur Sicherheit steht “ , sagte Roger Dow , CEO der U.S. Travel Association .
Per Luftrettungsdienst von Nordsee @-@ Bohrinsel geretteter Vogel wieder freigesetzt
Ein per Luftrettungsdienst an die Küste geflogener Vogel , der erschöpft auf einer Nordsee @-@ Bohrinsel gefunden worden war , wurde wieder in die Natur entlassen .
Die Wasserralle wurde letzten Monat mit einem Hubschrauber nach Aberdeen geflogen , wo sie von der schottischen Tierschutzorganisation SPCA in deren Rettungscenter in Alloa aufgepäppelt wurde .
Colin Seddon , Leiter des Zentrums , sagte : „ Diese Wasserralle war wahrscheinlich ein winterlicher Zugvogel aus Nordeuropa , der durch die starken Winde über der Nordsee aufgehalten wurde . “
Anscheinend suchte der erschöpfte Vogel Zuflucht auf der Bohrinsel .
Er fügte hinzu : „ Er konnte nicht mehr weiterfliegen , weshalb wir mit der Bitte um Hilfe kontaktiert wurden . “
Bei ihrer Freilassung war die Wasserralle wieder fit und gesund .
Ist Europas Elite bereit , mit Großbritannien Geschäfte zu machen ?
Business for Britain wurde im April mit der Absicht gestartet , die Wirtschaft an einen Tisch zu bringen und zu definieren , was diejenigen , die in Großbritannien für Wohlstand und Arbeit sorgen , an unseren Beziehungen zur EU ändern möchten .
Zu diesem Zweck haben wir die größte und umfassendste Umfrage unter britischen Wirtschaftsführern in Auftrag gegeben und sie gefragt , was sie über Großbritannien , die Wirtschaft und die EU denken .
YouGov befragte über 1.000 Führungskräfte aus der Wirtschaft , die in etwa die britischen Unternehmensgrößen , -sektoren und Regionen abbilden .
Die Ergebnisse der Umfrage werden viele überraschen .
Wir haben herausgefunden , dass die überwiegende Mehrheit der Unternehmen inzwischen außerhalb Europas exportiert und sich auf Länder konzentriert , die modernisieren und wachsen , während die Staaten in der EU stagnieren .
Sie wünschen sich , dass von Regierungsseite neue Handelsverbindungen mit Ländern wie China , Indien und Brasilien favorisiert werden , statt sich mit dem langen und anstrengenden Prozess aufzuhalten , die obskuren EU @-@ Institutionen zu reformieren .
Gefragt nach ihrer Ansicht zu bestimmten gesetzlich geregelten Themen – vom Kartellrecht bis zur Produktgesetzgebung – ist die Mehrheit der Wirtschaftsführer der Ansicht , die Kontrolle über diese Schlüsselkompetenzen sollte nach Westminster zurückgeholt werden .
Es herrschte allgemeine Unzufriedenheit über den Binnenmarkt , da laut Aussage der Unternehmen die Kosten der Brüsseler Vorschriften inzwischen die Vorteile überwiegen würden , Teil von Europas Handelszone zu sein – selbst 40 Prozent der Großunternehmen stimmten dem zu , die traditionell am europafreundlichsten sind .
Schließlich , und das sagt vermutlich am meisten , ergab unsere Befragung von Wirtschaftsführern , dass eine deutliche Mehrheit sich von Großbritannien einen Kurs in Richtung Veränderung des Abkommens wünscht und eine Beziehung zur EU , die auf Handel basiert , nicht auf Politik .
Diese Erkenntnis , die sich bei Unternehmen aller Größen und führenden Konzernen findet , zeigt , dass die Wirtschaft auf eine „ sinnvolle Veränderung “ drängt , die das Heft des Handelns wieder nach Großbritannien bringt .
Es geht um viel – eine Änderung des Abkommens und bessere Bedingungen für Großbritannien würden bei 16 Prozent zu einer Meinungsänderung zugunsten des Verbleibs in der EU in einer Volksabstimmung führen .
Der Premierminister sollte keine Zweifel haben : Diese Umfrage zeigt , dass die britische Wirtschaft hinter seinem Plan für die Neuverhandlungen der britischen Bedingungen für die EU @-@ Mitgliedschaft steht .
Sie zeigt auch , dass die Unternehmen von einer Neuverhandlung eine deutliche Verschiebung der Machtverhältnisse zurück nach Großbritannien erwarten .
Ein besserer Deal für die britische Wirtschaft ist möglich und in zunehmendem Maße notwendig , nachdem die Eurozone sich nun in Richtung einer engeren Wirtschafts- und Fiskalunion bewegt .
Die Priorität müssen Arbeitsplätze und Wachstum in Großbritannien sein , wie das Ergebnis unserer Umfrage zeigt , was für Unternehmen ein verstärktes Augenmerk auf Handel und eine fundamentale Veränderung im Brüsseler Ansatz für Vorschriften bedeutet .
Alexei Miller von Gazprom bezeichnet Pipeline in Bulgarien als Beginn einer neuen Gasära
Der Baubeginn der South @-@ Stream @-@ Pipeline in Bulgarien stelle den Start eines der größten europäischen Energieprojekte dar , erklärte der Gazprom @-@ Vorstand .
„ Das heutige Ereignis ist ein Meilenstein : Die Bauarbeiten am bulgarischen Abschnitt der South @-@ Stream @-@ Gaspipeline , dem größten und wichtigsten Projekt in Europa , haben begonnen “ , sagte der Vorstandsvorsitzende von Gazprom , Alexei Miller , am Donnerstag in einer Erklärung .
Das Projekt ist ein Schlüsselelement für die Energiesicherheit des gesamten europäischen Kontinents .
South Stream soll für mehr Vielfalt bei Russlands Exportrouten durch Europa sorgen .
Ein Vertragsstreit zwischen Gazprom und seinen Pendants in der Ukraine , in dem der Großteil des russischen Gases für Europa gelagert ist , sorge für ein erhöhtes Risiko bei konventionellen Routen , wie von offizieller Seite zu hören ist .
Miller sagte , die direkte Verbindung nach Bulgarien , einem Mitglied der Europäischen Union , bedeute , dass die mit Transitländern verknüpften geopolitischen Risiken „ für immer “ ausgeschaltet seien .
Bulgarische Verbraucher erhalten Gas von South Stream zu vergünstigten Tarifen , wenn das gesamte Projekt 2015 in Betrieb geht .
Laut Gazprom sollen die Bauarbeiten in anderen nachgeordneten Ländern auf der geplanten Route zum Jahresende beginnen .
Die Pipeline ist auf eine jährliche Kapazität von 62,3 Milliarden Kubikmetern Erdgas ausgelegt .
Für nationale und internationale Investoren führt kein Weg vorbei am Immobilienstandort Deutschland .
Die wirtschaftlichen Rahmendaten stimmen , und die Finanzierungsmöglichkeiten sind hervorragend .
Dies ist der Tenor des 9. Immobilientages der Börsen @-@ Zeitung gewesen .
Die deutschen Immobilienmärkte profitieren von der wirtschaftlichen Stärke und den im europäischen Vergleich guten konjunkturellen Rahmenbedingungen im Land .
Darauf hat Christian Ulbrich , CEO Europa , Naher Osten und Afrika von Jones Lang LaSalle , auf dem 9. Immobilientag der Börsen @-@ Zeitung hingewiesen .
Wie gesucht deutsche Gewerbeimmobilien seien , zeige der Blick auf das Transaktionsvolumen , so Ulbrich .
In den ersten drei Quartalen dieses Jahres legte es im Vergleich zum Vorjahresabschnitt um 31 % zu .
In Großbritannien lag das Plus nur bei 6 % , in Frankreich bei 19 % .
&quot; Immobilieninvestments bieten eine attraktive Verzinsung &quot; , sagte Ulbrich .
Der Renditeabstand zwischen Immobilien und Bundesanleihen sei auf einem historisch hohen Niveau .
Die FAA lockert Einschränkungen für die Nutzung elektronischer Geräte in Flugzeugen – auch wenn das Telefonieren mit dem Handy weiterhin verboten bleibt .
Kampfflugzeuge greifen ein Depot russischer Raketen in der Hafenstadt Latakia an , wie offiziell verlautbart wurde .
Dies ist offenbar eine Fortsetzung der israelischen Kampagne , mit der die Verbreitung von Waffen im Nahen Osten verhindert werden soll .
Bundesberufungsgericht blockiert Entscheidung einer Richterin , wonach die umstrittene Taktik des NYPD Minderheiten diskriminiere .
Knapp 100 afrikanische Einwanderer , die nach Algerien einreisen wollten , verdursten , nachdem zwei LKWs mitten in der Sahara liegen bleiben .
Experten sagen , dass das Gewaltverbrechen , bei dem 14 Erwachsene und sieben Kinder starben , nichts als reiner Zufall sei und kein Zeichen für wachsende Gewalt in Amerika .
Statt sich von der Zahlungsunfähigkeit der US @-@ Regierung verunsichern zu lassen , konzentrierten sich Investoren auf das , was vermutlich mehr zählt : die Federal Reserve .
Die Kalifornierin plant , die möglicherweise erste Vorladung dieser Art anzufechten , mit der Begründung , die mit dem Internet verbundene Brille erleichtere die Navigation .
Die Polizei gibt an , sie sei im Besitz eines Videos , auf dem angeblich zu sehen sei , wie Bürgermeister Rob Ford eine Crack @-@ Pfeife rauche .
Selbst enge Verbündete haben Geheimnisse voreinander – und versuchen alles , um herauszufinden , was zurückgehalten wird .
Der Vatikan möchte wissen , wie katholische Pfarreien auf der ganzen Welt mit sensiblen Themen wie Verhütung , Scheidung und schwule Paare umgehen .
Anhörung vor der Königlichen Kommission : Zwei YMCA @-@ Mitarbeiter vor Anschuldigungen gegen Jonathan Lord wegen Sexualdelikten angeklagt
Zwei YMCA @-@ Mitarbeiter aus New South Wales ( NSW ) seien wegen Sexualdelikten im Zusammenhang mit Kindern angeklagt worden , ehe 2011 Vorwürfe gegen den Kinderpfleger Jonathan Lord aus Caringbah erhoben wurden , wie die Königliche Kommission für sexuellen Missbrauch von Kindern erfuhr .
Doch bei der Eröffnungserklärung vor der Kommission hatte der YMCA erklärt , man habe „ in der Organisation niemals mit einem Vorfall von sexuellem Kindesmissbrauch zu tun gehabt “ .
Geschäftsführer Phillip Hare wurde über einen Fall befragt , bei dem ein YMCA @-@ Mitarbeiter wegen Vergehen mit Kinderpornografie angeklagt worden war , und einen anderen , bei dem ein Sportlehrer der YMCA Caringbah Hall 1991 wegen des Missbrauchs ihm anvertrauter Kinder verurteilt worden war .
Hare sagte Gail Furness , einer der Kommission assistierenden Anwältin , dass er von dem ersten Fall gewusst habe , den zweiten aber nicht gekannt habe .
Er räumte ein , die Eröffnungserklärung des YMCA gegenüber der Kommission sei ebenfalls ungenau in der Behauptung gewesen , „ es habe externe Überprüfungen des YMCA gegeben , in denen der YMCA als an vorderster Front bei der Kindersicherheit anerkannt wurde “ .
Beweise vor der Kommission zeigen vielmehr , dass der YMCA darüber unterrichtet wurde , dass er die zweitniedrigste Bewertung von vier möglichen in einem Qualitätsaudit des Department of Education and Communities ( Erziehungsministerium ) im August des Jahres erhalten hat .
Hare , der mit 21 beim YMCA angefangen hat , räumte ein , die Geschäftsleitung habe „ von mir an abwärts “ bei der Einstellung von Lord versagt und nicht sichergestellt , dass Mitarbeiter sich über ihre Verpflichtungen im Klaren gewesen seien , Verstöße gegen die Richtlinien zur Kindersicherheit zu melden .
Lord war Anfang des Jahres wegen Sexualvergehen an zwölf Jungen während seiner zweijährigen Tätigkeit für den YMCA verurteilt worden .
Er wurde zu mindestens sechs Jahren Gefängnis verurteilt .
Hare stritt aber ab , dass der YMCA ein kulturelles Problem hätte , das Mitarbeiter davon abgehalten habe , Lords Verstöße in Bezug auf die Sicherheit von Kindern zu melden .
Die Mitarbeiter sagten aus , sie hätten Verstöße beobachtet , unter anderem , dass Lord allein mit Kindern war , sie privat als Babysitter betreute , sie auf seinem Schoß sitzen ließ , zu einem sagte , dass er es lieb habe , und Kinder mit seinem Handy spielen ließ .
Danielle Ockwell , deren Vorgesetzter Lord war und die um eine Schulung zum Kinderschutz gebeten hatte , weil sie wegen seines Verhaltens besorgt war , sagte aus , dass die Kinderdienstleiterin Jacqui Barnat , die im YMCA Caringbah die Vorgesetzte Lords war , „ sehr einschüchternd und die meiste Zeit sehr unnahbar war “ .
Der Geschäftsführer erklärte , er würde Aussagen von Mitarbeitern nicht akzeptieren , wonach diese sich nicht getraut hätten , ihren Vorgesetzten Meldung zu erstatten .
Stattdessen , so sagte er , habe vielmehr ihre Freundschaft mit Lord ihr Urteilsvermögen beeinträchtigt , weshalb sie ihn nicht gemeldet hätten .
Hare erklärte , er habe dem Vorstand des YMCA NSW seine Ansicht mitgeteilt , dass die Lektion , die die Organisation aus dem „ Jonathan @-@ Lord @-@ Zwischenfall “ zu ziehen habe , „ nicht das Melden “ durch Mitarbeiter betreffe , und der Vorstand habe ihm zugestimmt .
Hare sagte , die Entscheidung , die Mitarbeiter zur Unterzeichnung von Geheimhaltungsverpflichtungen kurz nach Auftreten der Anschuldigungen zu drängen , sei vom Geschäftsführer der Kinderdienste des YMCA , Liam Whitley , getroffen worden .
Er sagte , damit sollte eine Kontaminierung der Beweise verhindert werden , was aber „ übereifrig “ und schlecht umgesetzt worden sei .
Der YMCA NSW sei in der Zeit , als Jonathan Lord zwischen 2009 und 2011 dort beschäftigt war , keine für Kinder sichere Organisation gewesen , erklärte Professor Stephen Smallbone von der Griffith University , Experte für sexuellen Kindesmissbrauch , der Kommission .
Er erläuterte , dass es „ ernsthafte Probleme “ bei der Einstellung , Überprüfung , Einarbeitung , Schulung und Beaufsichtigung der Mitarbeiter gegeben habe .
Die Anhörung wurde bis 20. Dezember vertagt .
Tony Blair erklärte , er würde die Chance zu einer Rückkehr als britischer Premierminister nutzen – räumt aber ein , dass ein Comeback unwahrscheinlich sei .
In einem Interview heute Abend anlässlich des fünften Jahrestages seines Ausscheidens aus dem Amt verkündete der 59 @-@ Jährige seine Ansichten zu verschiedenen innenpolitischen Themen .
Seit seinem Rücktritt im Juni 2007 nach einem Jahrzehnt als Staatschef hat Blair es weitgehend vermieden , sich zu britischer Politik zu äußern , und seine Kommentare meistens auf die Außenpolitik und seine Rolle als Gesandter des Quartetts der Friedensstifter im Nahen Osten beschränkt .
Auf die Frage , ob er gerne in das Amt des Premierministers zurückkehren würde , wurde Blair vom Evening Standard aus London mit den Worten zitiert : „ Ja , sicher , aber es ist unwahrscheinlich , dass das passiert , also ... “
Als sich die Pferdeschau @-@ Experten in Scharen in Cardiff einfanden , um das Pferd des Jahres zu küren , war ihnen bewusst , dass ein harter Konkurrenzkampf bevorstand .
Doch keiner war auf den drei Jahre alten Fenton Kirkland vorbereitet .
Der Knirps , der noch nicht einmal im Kindergarten ist und erst vor ein paar Monaten seine ersten Schritte gemacht hat , und sein Shetland @-@ Pony Toffee trabten locker durch die drei Runden und holten den ersten Preis – wobei sie 30 erwachsene Gegner hinter sich ließen .
Das unzertrennliche Paar , beide gleich groß , wurden wegen ihres Auftretens , Verhaltens und Stils beim alljährlichen Wettbewerb gelobt , der vom Sunnybank Equestrian Centre in Rudry nahe Cardiff veranstaltet wird .
Bei seinem Auftritt in Konkurrenz gegen Männer und Frauen mit eleganten Melonen hatte er seine Tellermütze in einem frechen Winkel aufgesetzt und führte den zwei Jahre alten Toffee durch den Ring .
Fenton wurde von den Juroren für seine natürlichen Fähigkeiten beim Umgang mit dem Pony gepriesen , die weit über seinem Alter lägen .
Und Toffee erhielt Bestnoten für sein Auftreten und seine Persönlichkeit .
Fenton hatte Toffee letzten März als Geschenk zu seinem dritten Geburtstag bekommen und seitdem jeden Tag mit dem Shetland @-@ Pony geübt .
Seine Mutter , Donna , 30 , sagte : „ Fenton und Toffee sind ein großartiges Gespann . “
Sie mussten gegen das gesamte Teilnehmerfeld antreten und sind mit Goldpokal und Rosette vom Platz gegangen .
Es war erst das zweite Mal , dass er mit Toffee an einem Wettbewerb teilgenommen hatte , und wir waren alle begeistert , als er gewonnen hat .
Vollkommen Fremde in der Arena hielten ihn für so phänomenal , dass sie mit ihm fotografiert werden wollten .
Der kleine Junge aus dem Dorf Nantyglo in der Nähe von Ebbw Vale , South Wales , folgt in den Fußstapfen seiner Tante Sharon Howells , die seit über zehn Jahren Pferde vorführt .
Howells erzählte : „ Das ganze Publikum war wie elektrisiert und alle haben ihn angefeuert und geklatscht . “
Er lief auf Sand die gesamte Länge der Arena und obwohl er so winzig aussah , hat er phantastische Arbeit geleistet .
Fenton ist verrückt nach Tieren – er liebt Pferde , Traktoren und Bauernhöfe und hat zwei Hühner , um die er sich kümmert .
So wie er gestartet ist , wird es nicht lange dauern , bis er auf der „ Pferd des Jahres “ -Schau ist – und ich bin mir sicher , dass er gut abschneiden wird .
Ein Sprecher der jährlichen Pferdeschau sagte : „ Fenton ist erst drei , aber er weiß , wie er mit seinem Pony umgehen muss . “
Zusammen sind sie ein tolles Team .
Die Juroren bewerteten Fenton und Toffee danach , wie gut sie sich geschlagen und im Vorführring präsentiert hätten .
Sie achten auf gute Zusammenarbeit zwischen Pony und Führer – und da waren Fenton und Toffee die Besten im Ring .
Ich bin mir sicher , dass Fentons süße Kleidung ihren Teil dazu beigetragen hat , das passte wirklich perfekt zum Anlass .
Chinesische Zeitung soll nach Aufruf „ reformiert “ werden
Eine chinesische Zeitung , die auf der Titelseite die Freilassung eines Reporters gefordert hatte , der wegen Diffamierung angeklagt worden war , solle reformiert werden , erklärte ein Presseregulator .
Der in Guangzhou ansässige Neue Express hatte einen seltenen öffentlichen Aufruf zur Freilassung des Journalisten Chen Yongzhou abgedruckt .
Doch Chen gab später im Fernsehen zu , dass er Bestechungsgelder angenommen habe , um Berichte über eine teilstaatliche Firma zu fälschen .
Jetzt werde der Neue Express einer „ umfassenden Rektifizierung “ unterzogen , erklärte die Regulierungsbehörde .
Die „ Rektifizierunganordnung “ erging von der Behörde für Presse und Publikationen , Radio , Film und Fernsehen in Guangdong .
Vorläufige Ermittlungen ergaben , dass der Neue Express , der zur Yangcheng Evening News Group gehört , zwischen September 2012 und August 2013 mehrere unzutreffende Berichte über das börsennotierte Unternehmen Zoomlion veröffentlicht hatte .
„ Das Redaktionsmanagement des Neuen Express war ungeordnet “ , gab die Regulierungsbehörde in einer Erklärung bekannt .
Sie sagte , man habe entschieden , „ eine administrative Strafe für Chen Yongzhou zu verhängen und ihm seine Reporterlizenz zu entziehen “ .
Außerdem habe man „ die Yangcheng Evening News Group angewiesen , eine vollständige Rektifizierung des Neuen Express vorzunehmen und empfohlen , die relevanten Verantwortlichen beim Neuen Express zu ermitteln und unverzüglich das Führungsteam des Neuen Express zu überprüfen . “
Chen hatte mehrere Artikel für den Neuen Express geschrieben , in denen er über angebliche finanzielle Unregelmäßigkeiten bei einem Hersteller von Baumaschinen namens Zoomlion berichtete .
Nachdem er verhaftet worden war , veröffentlichte die Zeitung zwei Aufrufe für seine Freilassung auf der Titelseite und stellte sich hinter seine journalistische Arbeit .
Doch dann trat Chen im Staatsfernsehen auf und gab zu , dass er gegen Bezahlung falsche Berichte veröffentlicht habe .
„ In diesem Fall habe ich Zoomlion geschädigt ebenso wie die gesamte Nachrichtenbranche und ihre Fähigkeit , das Vertrauen der Öffentlichkeit zu gewinnen “ , erklärte er gegenüber dem staatlichen Nachrichtensender CCTV .
Ich habe es in erster Linie getan , weil ich auf Geld und Ruhm aus war .
Mir ist klar geworden , dass ich falsch gehandelt habe .
Im Anschluss an Chens Entschuldigung veröffentlichte der Neue Express eine Entschuldigung auf der Titelseite und erklärte , man habe es versäumt , die Berichte korrekt zu überprüfen .
Verschiedene bekannte Verdächtige haben in jüngster Zeit im Fernsehen Geständnisse abgelegt .
Experten sagen , dass Geständnisse immer noch routinemäßig erzwungen werden , trotz einer Gesetzesänderung Anfang des Jahres , in der den Behörden verboten wurde , jemanden zu zwingen , sich selbst zu beschuldigen .
Drogentunnel mit eigener Eisenbahn zwischen den USA und Mexiko entdeckt
Einer der raffiniertesten Tunnel für den Drogenschmuggel zwischen den USA und Mexiko , der komplett mit Beleuchtung , Belüftung und elektrischem Bahnbetrieb ausgestattet war , wurde jetzt entdeckt .
Die US @-@ amerikanischen Behörden beschrieben den 120 mal 90 Zentimeter messenden Tunnel als eine der ausgefeiltesten Passagen , die sie jemals gefunden hätten .
Der Tunnel , der im Zickzackmuster über eine Länge von knapp sechs Fußballfeldern verläuft , verbindet Lagerhallen in der Nähe von Tijuana , Mexiko , und San Diego , USA .
In der Gegend gibt es zahllose unscheinbare Lagerhallen , was es leichter macht , mit Drogen beladene LKWs zu verbergen .
Der Tunnel sei geschlossen worden , bevor Drogen unerkannt darin transportiert werden konnten , erklärten die Behörden .
Bei der Entdeckung des Tunnels seien achteinhalb Tonnen Marihuana und 148 Kilogramm Kokain sichergestellt worden , so die Aufzeichnungen des Gerichts .
Drei Männer , die laut Aussage der Behörden als Fahrer arbeiteten , wurden wegen des Besitzes und des beabsichtigten Verkaufs von Marihuana und Kokain angeklagt .
Ihnen drohen bei einem Schuldspruch Gefängnisstrafen zwischen zehn Jahren und lebenslang .
In Nogales , Arizona , setzen Schmuggler auf ein ausgedehntes unterirdisches Netzwerk von Entwässungskanälen .
Der Tunnel ist die achte große Passage , die seit 2006 in San Diego entdeckt wurde .
Einige der größten Tunnel wurden nach der Marihuana @-@ Ernte in Zentralmexiko im Oktober entdeckt , was die Drogenkartelle vor die Herausforderung stellt , wie sie ihr Produkt schnell zu den Konsumenten bringen können .
Im Jahr 2010 fanden Behörden eine knapp 640 Meter lange Passage mit Schienen , die von einer Küche in einem Wohnhaus in Tijuana zu zwei Lagerhäusern in San Diego verlief .
Orlando Bloom und Miranda Kerr lieben sich noch immer
Schauspieler Orlando Bloom und Model Miranda Kerr wollen künftig getrennte Wege gehen .
In einem Interview sagte Bloom jedoch , dass er und Kerr sich noch immer lieben .
Miranda Kerr und Orlando Bloom sind Eltern des zweijährigen Flynn .
Schauspieler Orlando Bloom hat sich zur Trennung von seiner Frau , Topmodel Miranda Kerr , geäußert .
In einem Interview mit US @-@ Journalistin Katie Couric , das am Freitag ( Ortszeit ) ausgestrahlt werden sollte , sagte Bloom , &quot; das Leben verläuft manchmal nicht genau so , wie wir es planen oder erhoffen &quot; .
Kerr und er selbst liebten sich noch immer , betonte der 36 @-@ Jährige .
&quot; Wir werden uns gegenseitig unterstützen und lieben als Eltern von Flynn &quot; .
Kerr und Bloom sind seit 2010 verheiratet , im Jahr 2011 wurde ihr Söhnchen Flynn geboren .
Der Veganismus ist laut Lexika dem Vegetarismus unterstellt , unterscheidet sich von diesem aber doch auf ganz erhebliche Weise .
Denn während Vegetarier sich den Verzehr von Sahnetorte , Eis oder einem kräftigen Edamer erlauben , stehen diese Schlemmereien nicht auf der Speisekarte eines Veganers .
Milch , Käse , Ei , neben den Verzicht auf Fleisch und Fisch lässt der Veganer vom sämtlichen Verzehr tierischer Produkte ab - auch Honig wird verneint .
Was bleibt , mag man sich fragen , doch bei näherer Betrachtung zeichnet sich die vegane Ernährungswelt durch einen beachtlichen Einfallsreichtum aus .
&quot; Brotaufstriche sind sehr beliebt &quot; , erklärt Ute Henkelmann , die Inhaberin des hiesigen Reformhauses , die eine Vielzahl spezieller Produkte für Veganer bereithält .
Auch Reuben Proctor besucht den Laden in der Domgasse gerne .
Seit 13 Jahren lebt der gebürtige Neuseeländer vegan , in Lampertheim findet er ( fast ) alles vor , was er zum Leben braucht . &quot; 1997 stellte ich meine Ernährung um und wurde Vegetarier &quot; .
Um die Jahrhundertwende erfolgte dann der nächste Schritt und ich wurde Veganer .
&quot; Die Überzeugung kam aber nicht nur wegen der Ernährung , sondern aufgrund der Schuhwahl &quot; , sagt Proctor , der Kunstleder normalem Leder vorzieht .
Er erkannte , dass es auch in anderen alltäglichen Belangen ohne tierische Produkte geht .
In erster Linie ist vegan sein eine Ethik .
&quot; Ich will nicht , dass Tiere für mich sterben müssen &quot; , spricht Proctor die Maxime der Veganer aus , die sich auf das gesamte Konsumverhalten erstreckt .
Statt Burgern , Rühreiern oder Gummibären hinterherzutrauern , habe der Veganer schnell ganz neue Produkte entdeckt , die Begeisterung stieg an .
&quot; Es ist ein doppelter Bonus &quot; , sagt Proctor heute , &quot; tatsächlich stellt vegan sein keinen Verzicht , keine Askese dar , sondern es ist eine Bereicherung &quot; . Die Annahme , dass man mit der Ernährungsumstellung die Auswahl an Speiseoptionen reduziere , führt Proctor eher auf die Macht der Gewohnheit zurück .
Und genau diese Konditionierungen ließen auch manchen noch so gut gemeinten Versuch scheitern .
&quot; Der Suchtfaktor ist ein ganz entscheidender Faktor , der viele schnell aufgeben lässt , ähnlich wie beim Rauchen &quot; , stellt Proctor einen Vergleich auf .
Und wendet ein : &quot; Bestimmte Geschmäcker sind nicht am Tier festzumachen &quot; .
Oft sind es die Gewürze oder die Art der Zubereitung , die den Geschmack ausmachen .
&quot; Man kann aber auch auf andere Weise den gleichen Effekt erzeugen &quot; , verdeutlicht der Veganer .
Zu einem Grillfest bringt Proctor beispielsweise Auberginen , Champignons und auch ein paar Veganwürste mit .
Er achtet auf eine ausgewogene , abwechslungsreiche Ernährung , bei der es durchaus auch einmal deftig schmecken soll .
Natürlich möchte man etwas zwischen den Zähnen haben , das ist legitim .
&quot; Es soll schmecken , aber das ist nicht nur auf tierische Nahrung zu reduzieren &quot; , so Proctor .
Gesundheitliche Schäden bis hin zu Essstörungen , eine weitere weitverbreitete Annahme , habe er nicht erlitten .
Für mich hatte die Umstellung einen positiven Aspekt .
Ich nehme kein fremdes Cholesterin auf und habe einen erhöhten Vitaminanteil .
Es gibt Hochleistungsathleten , die sich ausschließlich vegan ernähren .
&quot; Meine Blutwerte sind bestens , ich lasse mich oft checken &quot; , verrät Proctor .
Insbesondere vor dem Mangel an Vitamin B12 warnen viele Vegansimus @-@ Kritiker .
&quot; Da Tiere mit Futtermitteln genährt werden , statt auf der Weide zu grasen , ist es fraglich , ob in dem Fleisch , das man in der Kühltruhe kauft , der Vitamin @-@ B12 @-@ Anteil hoch ist &quot; , findet Proctor .
Für Veganer gebe es zudem die Möglichkeit , das Coenzym in Form von Tabletten zu sich zu nehmen .
&quot; Meine B12 @-@ Werte sind in Ordnung &quot; , erklärt er .
Weite Wege müsse Proctor für die Nahrungsmittelbeschaffung nicht gehen .
Grundnahrungsmittel gibt es schließlich überall und jeder Supermarkt hat mittlerweile Sojamilch und andere Produkte .
Alles , was ich brauche , finde ich vor Ort .
Nur ab und an kaufe ich etwas Spezielles .
&quot; Viele Leute übersehen , dass eben nur die Fertigprodukte teuer sind , aber so verhält es sich bei &quot; gewöhnlichen &quot; Fertigprodukten bekanntermaßen auch &quot; .
Ohnehin sei die Zubereitung veganer Gerichte weitaus günstiger und weniger zeitaufwendig , als gemeinhin angenommen .
&quot; In der Hausküche gibt es viel zu entdecken , mit ein paar kleinen Kniffen kann man gute , wenn nicht teilweise bessere Ergebnisse erzielen &quot; , sagt Proctor .
Margarine statt Butter , etwas mehr Backpulver und Kohlensäure statt Ei , mit seinen veganen Käsekuchen konnte Proctor auch seine Schwiegereltern zum Staunen bringen .
Familienfesten verleiht der Veganer eine neue Würze .
Das hat Dynamik , wenn man zusammen kocht , hat das einen neuen Stellenwert .
&quot; Die Situationen , die dabei entstehen können , sind so unterschiedlich wie die Menschen selbst &quot; , sagt Proctor .
Natürlich wurde ihm aber auch schon Skepsis entgegengebracht .
Schmeckt dir mein Essen nicht mehr ?
&quot; Soll ich mich jetzt schlecht fühlen , weil ich Milch trinke ? &quot; - bei solcherlei Fragen müsse man als Veganer mit Fingerspitzengefühl agieren .
&quot; Ich lehne die Menschen ja nicht ab , ich bin Teil dieser Gesellschaft &quot; , möchte Proctor kein Enklavendasein fristen .
Und genauer betrachtet erscheint die Alltagswelt dann gar nicht so veganfremd wie vermutet - und der Veganer nicht so im Alltag eingeschränkt wie gemeinhin angenommen .
Auch Fast Food ist erlaubt .
Pommes gibt es überall !
&quot; Viele Dönerläden bieten Falafel an , oder eben einen vegetarischen Yufka &quot; , sagt Proctor .
In einer Pizzeria weicht er auf Pastagerichte aus , oder bestellt eben eine Pizza ohne Käse , alles eine Frage der Gewohnheit .
Die Restaurants stellen sich so langsam darauf ein .
&quot; Als ich vor 13 Jahren angefangen habe , mich vegan zu ernähren , war alles noch viel schwieriger &quot; , kann der Neuseeländer eine Entwicklung ausfindig machen : &quot; Man muss mit den Leuten reden , sie darauf aufmerksam machen &quot; .
&quot; Wenn genügend Nachfragen kommen , sind sie vielleicht dazu geneigt , die Speisekarte zu ergänzen &quot; , hofft er .
Vegane Restaurants entwickeln sich , wie zum Beispiel die Kombüse in Mannheim oder das Café Vogelfrei .
Proctor hegt den Wunsch , dass auch andere Restaurants zumindest ein veganes Gericht auf der Speisekarte stehen haben .
Im Grunde genommen sind vegane Gerichte für alle da .
Jeder kann sie essen , sie sind also genau das Gegenteil von exklusiv .
&quot; Fleischgerichte sind dagegen exklusiv , und zwar im wahrsten Sinne des Wortes , denn sie schließen andere aus &quot; , stellt Proctor fest .
&quot; Wenn man Lebensmittelskandale vermeiden will , dann ist Veganismus ein sicherer Weg , den allergrößten Teil von vornherein unmöglich zu machen &quot; , sagt Proctor .
Der Einkauf veganer Produkte könne aber zu Beginn etwas schwierig sein .
Insbesondere wenn man zu verstehen lernt , das auch in Erdnüsse tierische Zusatzstoffe als Farbgeber enthalten seinen können , scheint man mit der Befolgung der Ethik bei so vielen Hürden und Fallen schnell der Mut zu verlassen .
Nicht nur deshalb haben Reuben Proctor und Lars Thomsen ein Buch geschrieben : &quot; Veganissimo - Tierische Inhaltsstoffe und ihre Alternativen &quot; erklärt die vielen Inhaltsstoffe , die Nahrungs- aber auch Reinigungsmitteln beigesetzt werden .
&quot; Nach und nach entwickelt man einen Scannerblick und weiß , auf welche Zeichen und Logos man zu achten hat &quot; Es ist manchmal besser kleine Schritte zu tun als stehenzubleiben oder zu stolpern &quot; , weiß Proctor .
Der Veganismus , er ist ein wichtiger moralischer Fingerzeig , der auf das Bewusstsein schlägt .
Vielleicht schafft er es nicht ganz , dass man seine Gewohnheiten ablegt , doch zumindest kann er den Konsumenten lehren , seine Gewohnheiten kritisch zu hinterfragen .
Der Börsenbetreiber Nasdaq OMX hält seine Kunden weiter in Atem .
Der Handel am Nasdaq Options Market wurde am Freitagnachmittag deutscher Zeit unterbrochen .
In einer Mitteilung machte der Betreiber technische Probleme verantwortlich .
Die anderen elf US @-@ Optionsmärkte , darunter auch zwei der Nasdaq OMX , setzten ihr Geschäft ungehindert fort .
Der jüngste Zwischenfall setzt eine ganze Serie von kleineren und größeren Pannen bei dem Börsenbetreiber fort .
Erst am Dienstag waren die Indizes der Nasdaq wegen Fehlern im Datentransport eine Stunde lang nicht berechnet worden .
Im August dieses Jahres hatte es allein in einer Woche zwei Pannen gegeben .
Zuerst hatte die US @-@ Investmentbank Goldman Sachs wegen technischer Probleme massenhaft fehlerhafte Kaufaufträge an die Optionsmärkte geschickt .
Daraufhin brauchten die Börsenbetreiber fast einen ganzen Tag , um die Orders durchzuschauen und zu streichen .
Zwei Tage darauf kam die Hälfte des gesamten Aktienhandels in den USA wegen einer Computerpanne an der Nasdaq @-@ Börse für mehrere Stunden zum Erliegen .
Für Aufsehen hatte zudem im vergangenen Jahr der Börsengang von Facebook gesorgt .
Die Nasdaq @-@ Systeme waren der Flut von Kauf- und Verkaufsaufträgen nicht gewachsen gewesen , stellte später die Börsenaufsicht SEC fest und verdonnerte das Unternehmen zu einer Rekordstrafe von 10 Millionen Dollar .
Konstanz : Radler fährt 63 @-@ Jährigen um
Zu dem Unfall war es nach Angaben der Polizei gekommen , als ein 26 Jahre alter Mann am Donnerstagabend , gegen 22 Uhr , mit einem Damenfahrrad ordnungswidrig auf dem linken Gehweg vom Bahnhofplatz in Richtung Marktstätte unterwegs war .
Als plötzlich ein 63 Jahre alter Mann von einem Lokal auf den Gehweg trat , konnte der Fahrradfahrer laut Polizei nicht mehr rechtzeitig bremsen .
Bei dem folgenden Zusammenstoß wurde der Fußgänger gegen die Hauswand gedrückt , ging im weiteren Verlauf zu Boden und zog sich eine rund 15 Zentimeter lange Platzwunde am Kopf zu .
Ein Rettungswagenteam brachte den Verletzten zur ärztlichen Behandlung ins Klinikum .
Britische Polizei stellt Assange einen Auslieferungsbescheid zu
Die britische Polizei hat heute einen Auslieferungsbescheid an WikiLeaks @-@ Gründer Julian Assange übergeben , der in der ecuadorianischen Botschaft in London Zuflucht gesucht und Asyl beantragt hat .
Scotland Yard erklärte , man habe dem 40 @-@ jährigen Australier eine „ Aufforderung , sich zu stellen “ zugestellt , die ihn zum Erscheinen in einer Polizeiwache auffordere , und fügte hinzu , sollte er dem nicht nachkommen , drohe ihm die Verhaftung .
Assange droht die Auslieferung nach Schweden wegen der Anklage in einem Sexualdelikt , nachdem seine Möglichkeiten nach britischem Recht ausgeschöpft sind , seit der Oberste Gerichtshof seinen Einspruch gegen die Auslieferung Anfang des Monats abgelehnt hat .
Da er befürchtet , Stockholm werde ihn an die USA ausliefern , hatte er am 19. Juni in der ecuadorianischen Botschaft in London Zuflucht gesucht und das südamerikanische Land um politisches Asyl gebeten .
Scotland Yard habe „ einem 40 @-@ jährigen Mann eine Aufforderung zugestellt , sich zu einem von uns gewählten Zeitpunkt bei einer Polizeiwache zu stellen “ , erklärte ein Sprecher .
Er verletzt weiterhin die Bedingungen seiner Freilassung auf Kaution .
Die Botschaft gab keinen Kommentar zur Zustellung der polizeilichen Aufforderung ab .
Assange fürchtet , er werde von Schweden an die Vereinigten Staaten ausgeliefert und dort wegen möglicher Spionagevorwürfe angeklagt , nachdem er über 250.000 diplomatische Nachrichten auf der Enthüllungswebsite WikiLeaks veröffentlicht hatte .
Fahrer , der mit 210 km / h und heißem Getränk zwischen den Beinen gerast war , erhält 1.000 £ Strafe
Einem Autofahrer wurde eine Strafe in Höhe von 1.000 £ auferlegt , weil er mit bis zu 210 km / h und einem Heißgetränk zwischen seinen Beinen gefahren war .
Andrew Howie , 35 , aus Tiptree , Essex , wurde am 27. Mai mit seinem Mercedes Benz auf der A120 bei Braintree gestoppt .
Nachdem ihn die Polizei angehalten hatte , entdeckten sie den Getränkebecher zwischen seinen Beinen .
Vor dem Amtsgericht Colchester bekannte sich Howie schuldig , ohne die nötige Sorgfalt und Aufmerksamkeit gefahren zu sein .
Er erhielt sieben Punkte und ein sechsmonatiges Fahrverbot .
Howie wurde außerdem zur Zahlung von Kosten in Höhe von 90 £ sowie eines Opferzuschlags von 100 £ verurteilt .
Steuer für ausländische Immobilienbesitzer gegen Londons Spekulationsblase
Das Finanzministerium hat provisorisch die CGT @-@ Maßnahme durchkalkuliert , wartet aber noch auf die abschließende Entscheidung von Schatzkanzler George Osborne , der im Haushalt 2012 eine Stempelsteuer in Höhe von 7 % auf Wohnungen verhängt hatte , die über zwei Millionen Pfund kosten sowie jährliche Gebühren für Käufer , die Wohnungen als Firma und nicht als Einzelpersonen halten .
Bereits jetzt übersteigen die Einnahmen aus der Stempelsteuer für Wohneigentum in den Bezirken Westminster und Kensington &amp; Chelsea , die im Steuerjahr 2012 / 13 bei 708 Millionen Pfund lagen , die Erlöse für Nordirland , Wales , Schottland , den Nordosten , Nordwesten , Yorkshire und die Region Humber zusammengenommen .
Cook sagte : „ Nach den Erhöhungen bei der Stempelsteuer auf hochpreisige Wohnungen und der Einführung der damit verbundenen Gesetzgebung gegen ein Umgehen kann man schwerlich behaupten , hochwertige Immobilien seien zu niedrig besteuert , ungeachtet der Auswirkungen des veralteten Gemeindesteuersystems . “
„ Doch dieser Schritt könnte einige ausländische Investoren zurückhaltender machen , was den Kauf von Immobilien in London angeht , oder Eigentümer davon abhalten zu verkaufen “ , fügte er hinzu .
Erstklassige Immobilien – die obersten fünf bis zehn Prozent des Wohnungsmarkts nach Preis – im wohlhabenden Londoner Südwestgürtel , der sich von Fulham bis Wimbledon erstreckt , haben sich um den Rekordwert von 11,8 % im letzten Jahr verteuert .
Die Preise in Central London wiesen ein gleichmäßiges jährliches Wachstum von 5,6 % auf , wurden aber von einem aufstrebenden „ Inlandsmarkt “ überschattet , auf dem der südwestliche Teil der Stadt , der Norden ( 7,4 % ) und der Osten ( 6,5 % ) einen Aufwärtstrend erlebten , so eine Untersuchung von Savills .
Wissenschaftler konnten mehr Licht darauf werfen , in welchem Zusammenhang das Schwanzwedeln eines Hundes mit seiner Stimmung steht .
Frühere Forschungen hatten gezeigt , dass glückliche Hunde mit dem Schwanz mehr nach rechts wedelten ( aus Sicht des Hundes ) , während es bei nervösen Hunden die linke Seite war .
Doch jetzt sagen Wissenschaftler , dass andere Hunde diese subtilen Unterschiede wahrnehmen und darauf reagieren können .
Professor Georgio Vallortigara , ein Neurowissenschaftler der Universität Trient , sagte : „ Beim Menschen ist gut bekannt , dass die linke und rechte Gehirnhälfte unterschiedlich auf Stimuli reagieren , die positive oder negative Emotionen hervorrufen . “
Hier haben wir versucht , uns dies bei anderen Spezies anzusehen .
Er bemerkte außerdem , dass bei Hunden genau wie beim Menschen die rechte Gehirnhälfte für die Bewegung der linken Seite zuständig sei und umgekehrt , und dass die beiden Hemisphären unterschiedliche Rollen bei den Gefühlen spielten .
Um mehr darüber zu erfahren , wie Hunde auf das seitliche Schwanzwedeln ihrer Artgenossen reagieren , überwachten die Forscher die Tiere , während sich diese Filme anderer Hunde ansahen .
Sie maßen die Herzfrequenz der Vierbeiner und analysierten das Verhalten .
Wahrscheinlich werden wir bald verstehen , warum sich der Schwanz mal in die eine , mal in die andere Richtung bewegt
Professor Vallortigara sagte : „ Wir haben den Hunden Filme mit Hunden gezeigt – entweder eine naturgetreue Version oder eine Silhouette , um ablenkende andere Aspekte zu eliminieren , und wir konnten damit die Bewegung des Schwanzes mehr nach links oder rechts steuern . “
Wenn die Tiere sahen , wie ein ansonsten ausdrucksloser Hund den Schwanz nach rechts bewegt hat ( von der Perspektive des wedelnden Hundes aus gesehen ) , blieben sie völlig entspannt .
War aber die Schwanzneigung vornehmlich nach links ( wieder aus Perspektive des Hundes , der wedelt ) , so stieg ihre Herzfrequenz und sie sahen unruhig aus .
Nach Ansicht von Professor Vallortigara kommunizieren die Hunde nicht absichtlich miteinander durch diese Bewegungen .
Er ist vielmehr überzeugt , dass die Hunde aus Erfahrung gelernt hätten , bei welchen Bewegungen sie sich Sorgen machen sollten und wann nicht .
Er sagte : „ Wenn man verschiedene Begegnungen mit anderen Hunden hat und das Wedeln mit dem Schwanz in eine Richtung eher mit freundlichem Verhalten verknüpft ist und die rechte Seite eher ein weniger freundliches Verhalten produziert , dann reagiert man auf Basis dieser Erfahrungen . “
Die Forscher sagen , dass die Erkenntnisse Hundebesitzern , Tierärzten und Trainern zu einem besseren Verständnis der Emotionen ihres Tieres verhelfen könnten .
John Bradshaw , Experte für Hundeverhalten und Gaststipendiat an der Fakultät für Tierheilkunde der Universität von Bristol erklärte , dies sei nicht die erste Studie gewesen , bei der untersucht wurde , ob links und rechts für Hunde wichtig sei .
Letztes Jahr fand ein Team der Universität von Lincoln heraus , dass Hunde den Kopf nach links drehen , wenn sie einen aggressiven Hund ansehen , und nach rechts , wenn es sich um einen zufriedenen Hund handelt .
In einer anderen Forschungsarbeit an der Universität von Victoria in Kanada stand Folgendes : „ Hunde gehen eher auf einen Roboterhund zu , wenn sein , Schwanz ‘ links wedelt und nicht rechts , statt unruhig zu werden – genau andersherum als in der italienischen Studie . “
Laut seiner Aussage könnten die Unterschiede daher rühren , dass die Hunde in den verschiedenen Studien die Tiere in den Filmen bzw. die Roboterhunde nicht als Hunde interpretierten .
Eine Studie , wie Hunde auf echte Hunde reagieren , könnte helfen , erklärte er .
„ Zwar gibt es beträchtliche Belege für viele verschiedene Säugetiere , dass die beiden Gehirnhälften für verschiedene Zwecke verwendet werden , doch müssen viele der Details noch bestimmt werden – und Hunde bilden da keine Ausnahme “ , so Bradshaw .
Da sich ihr Verhalten aber einfach aufzeichnen lasse , werde es vermutlich nicht lange dauern , bis wir verstehen , weshalb sich der Schwanz manchmal in die eine , manchmal in die andere Richtung bewegt .
Arctic Monkeys verschieben Auftritt in Glasgow wegen der Erkrankung Alex Turners
Die Rockband Arctic Monkeys hat einen Auftritt in Glasgow verschoben , nachdem ihr Leadsänger an Kehlkopfentzündung erkrankt ist .
Die Band aus Sheffield sollte am Freitag im Hydro spielen .
Wegen der Krankheit des Leadsängers Alex Turner muss das Konzert nun allerdings verlegt werden .
Die Ankündigung der Band kam , nachdem sie zuvor schon einen Auftritt in der LG Arena in Birmingham am Donnerstag verschieben musste .
In einer Erklärung auf ihrer offiziellen Website teilten die Arctic Monkeys mit : „ Nach der Entscheidung , die Show in der LG Arena in Birmingham heute Abend abzusagen sowie auf ärztlichen Rat müssen die Arctic Monkeys auch die Show im Hydro in Glasgow am Freitag , dem 1. November absagen . “
„ Bei Alex Turner wurde eine Kehlkopfentzündung diagnostiziert , weshalb er leider nicht auftreten kann . “
Die Show in der LG Arena in Birmingham findet nun am 20. November statt , die im Hydro in Glasgow wurde auf den 21. November verlegt .
Alle Tickets behalten für diese Shows Gültigkeit .
Wir entschuldigen uns bei allen Ticketinhabern für die hierdurch entstandenen Unannehmlichkeiten .
Bitte wenden Sie sich an den Kundenservice an den Verkaufsstellen , an denen Sie Ihr Ticket gekauft haben , falls Sie weitere Unterstützung benötigen .
Papst Franziskus ernennt im Februar erste Kardinäle
Papst Franziskus werde am 22. Februar erstmals neue Kardinäle der katholischen Kirche berufen , wie der Vatikan am Donnerstag bekannt gab .
Kardinäle sind die ranghöchsten Kleriker in der katholischen Kirche nach dem Papst und sie sind es auch , die einen Papst wählen , sodass Franziskus damit die erste Gruppe von Männern ernennen wird , die letztendlich bei der Wahl seines Nachfolgers mitwirken werden .
Derzeit gibt es 201 Kardinäle .
Jedoch kann ein Kardinal , der ein Alter von 80 Jahren erreicht hat , nicht mehr an der Papstwahl teilnehmen – das fällt einer Gruppe von 120 „ wahlberechtigten Kardinälen “ zu .
In einer Erklärung , in der die Nachricht bekannt gegeben wurde , sagte Pater Federico Lombardi , ein Sprecher des Vatikans , es werde ein Treffen aller Kardinäle stattfinden , ehe die Zeremonie zur Ernennung der neuen Kardinäle abgehalten werde , die auch als Konsistorium bekannt sei .
„ Papst Franziskus hat beschlossen , seine Entscheidung zur Einberufung des Konsistoriums im Februar im Voraus bekannt zu geben , damit andere Treffen , die die Teilnahme von Kardinälen aus aller Welt erfordern , geplant werden können “ , sagte Lombardi .
Jack Valero von Catholic Voices sagte , dass die Zahl der wahlberechtigten Kardinäle bis Februar wahrscheinlich gesunken sein werde .
Er erklärte , ein Papst ernenne normalerweise so viele Kardinäle wie nötig , damit die Zahl der wahlberechtigten Kardinäle wieder 120 betrage , und so viele Kardinäle über 80 , wie er möchte .
Das Konsistorium im nächsten Jahr sei deshalb bedeutsam , weil es das Erste seit der Wahl von Franziskus im März diesen Jahres sei , so Valero .
Derzeit gebe es einen gewissen Überhang aufseiten Europas und insbesondere Italiens .
„ Es wird interessant sein zu sehen , ob der neue Papst Kardinäle aus dem Rest der Welt ernennen wird , um das Gleichgewicht wiederherzustellen “ , sagte er .
Vierzig Prozent der Katholiken leben in Südamerika , doch sie haben nur eine winzige Anzahl von Kardinälen .
Die Kardinäle werden auch die Ersten sein , die seit der Bildung des von Franziskus gegründeten Rates der Kardinäle berufen werden , eine Gruppe von acht Kardinälen aus der ganzen Welt , die den Auftrag haben , Möglichkeiten zur Reformierung der Kirche zu finden .
In der Vergangenheit entschied der Papst alles allein .
„ Nun hat Franziskus diese acht Kardinäle ausgewählt , die ihm helfen sollen “ , sagte Valero .
Er erklärte , es sei „ gut möglich “ , dass Franziskus die Kardinäle um Rat bitte .
Doch bisher waren wir nicht in dieser Lage – das ist alles ganz neu .
Valero sagte , dass typischerweise die Bischöfe aus großen Orten zu Kardinälen berufen würden , doch stecke Franziskus „ voller Überraschungen – wir wissen also nicht , wen er ernennt “ .
GM ruft neue Pickup @-@ Trucks in den USA zur Reparatur der Sitzlehne zurück
General Motors rufe knapp 19.000 seiner brandneuen Chevrolet Silverado- und GMC Sierra @-@ Pickup @-@ Trucks mit Baujahr 2014 zurück , um ein Problem mit der manuell verstellbaren Sitzlehne zu beheben , so eine Mitteilung der US @-@ amerikanischen Regulierungsbehörde für Fahrzeugsicherheit am Freitag .
Bei einigen der Wagen kann es einen Defekt im Mechanismus für das Zurückstellen der Vordersitzlehne geben .
Aus diesem Grund erfüllen sie nicht die Bundesrichtlinien für die Fahrzeugsicherheit bei Kopfstützen .
„ Wenn von hinten auf das Fahrzeug aufgefahren wird , ist es möglich , dass die Kopfstütze die Insassen nicht richtig schützt , sodass ein erhöhtes Verletzungsrisiko besteht “ , war in der Nachricht auf der Website der National Highway Traffic Safety Administration ( NHTSA ) zu lesen .
Die zurückgerufenen Modelle wurden zwischen dem 1. August und 10. September hergestellt .
Die Lieferung der GM @-@ Trucks begann im Juni und stellt den wichtigsten Modellstart des führenden US @-@ amerikanischen Autoherstellers seit der insolvenzbedingten Umstrukturierung 2009 dar .
GM informierte die Fahrzeugbesitzer in der ersten Oktoberhälfte über den Defekt .
Die NHTSA konnte wegen des 16 @-@ tägigen Government Shutdowns das Benachrichtigungsschreiben nicht prüfen , was sich negativ auf die Autoverkäufe im Oktober auswirkte .
Der Verkauf der Silverado- und Sierra @-@ Trucks , die für das Modelljahr 2014 neu entwickelt wurden , sei in den ersten zehn Monaten des Jahres um 20 Prozent gestiegen , erklärte GM am Freitag .
Im Oktober verkaufte GM 42.660 Silverado- und 16.503 Sierra @-@ Pickup @-@ Trucks .
Die GM @-@ Aktie stieg an der New Yorker Börse um 1,4 Prozent auf 37,47 US @-@ Dollar am Freitagnachmittag .
Verzweiflungsschrei eines Obama @-@ Wählers
Ich habe Präsident Obama zweimal gewählt in der Hoffnung darauf , dass Veränderung möglich sei
Er sagt , Obama habe lobenswerte Bemühungen unternommen , die von der Blockadetaktik der Republikaner vereitelt worden seien
Die Blockadepolitik entschuldige nicht die Website @-@ Probleme von Obamacare , die Drohnenangriffe
Obamas Memoiren über den Wahlkampf 2008 seien eine traurige Erinnerung an das , was möglich gewesen wäre
Nathaniel P. Morris ist Student im zweiten Jahr an der Harvard Medical School .
Ich lese derzeit ein furchtbar trauriges Buch .
Es ist ein Buch , von dem ich geglaubt habe , es würde mich während des trübsinnigen zweiten Jahres meines Medizinstudiums aufheitern und mir wieder Hoffnung geben .
Es heißt „ The Audacity to Win “ ( Mut zu gewinnen ) und schildert die Memoiren Barack Obamas zur Präsidentschaftswahl 2008 .
Wenn ich abends mit meinen Patientenniederschriften fertig bin und zu Bett gehe , dann führt mich das Buch zurück in eine Zeit , als die Politik Millionen inspirierte und einem Reden den Atem rauben konnten .
Die Wahl wurde zu einem Erdrutschsieg und Nachrichtensprecher hielten inne , um die historische Bedeutung dieser Stunde vor Augen zu führen .
Meine Klassenkameraden weinten vor Freude und meine Eltern sammelten alle Zeitungen , die sie finden konnten .
Ein junges Team von Visionären war auf dem Weg ins Weiße Haus und die Nation war bereit für Veränderung .
Als damals 2008 Obama ins Amt wechselte , hatte er Zustimmungswerte von 82 % .
Und dann schließe ich das Buch .
Wieder umzuschalten auf die Gegenwart ist ein böses Erwachen , als ob man aus einem Traum gerissen wird .
Es fällt schwer , sich an diese optimistischen Zeiten zu erinnern – sie scheinen eine vage Erinnerung zu sein , eine traurige Mahnung an verpasste Möglichkeiten .
In den Jahren , seit ich erstmals meine Stimme abgegeben habe , hat sich tatsächlich etwas verändert .
Aber es ist einfach nichts , was ich mir hätte vorstellen können .
Ich erkenne die großartigen und vielseitigen Dinge an , die Obama erreicht hat , von der Verabschiedung des Affordable Care Act für Krankenversicherung bis zum militärischen Abzug aus dem Irak , dem Ende des erzwungenen Verschweigens von Homosexualität in der Armee und der Tötung Osama bin Ladens .
Auch ich bin der Ansicht , dass die parteipolitische Blockadetaktik zu viele Bestrebungen gekippt habe , mit denen unsere Nation vorwärts gebracht werden sollte : Einwanderungsreform , eine öffentliche Option für Krankenversicherung und das Schließen von Guantanamo Bay , um nur einige zu nennen .
Doch nachdem ich zahllose Male die Obama @-@ Regierung gegenüber Kollegen und Bekannten verteidigt habe , bin ich mit meinen Erklärungsversuchen am Ende angelangt .
Ich habe einen Punkt politischer Verzweiflung erreicht .
Die republikanische Blockadepolitik kann nicht erklären , weshalb man das Abhören ausländischer Staatsoberhäupter zulässt oder die Tötung unschuldiger Kinder durch Drohnen in Übersee .
Es kann nicht erklären , weshalb die National Security Agency Daten über das Privatleben von Amerikanern sammelt und warum Whistleblower bestraft werden , die staatliches Fehlverhalten offenlegen .
Es kann nicht erklären , weshalb Anwar al @-@ Awlaki , ein US @-@ amerikanischer Staatsbürger , ohne Verfahren ermordet wurde , noch weshalb die öffentlichen Finanzierungs- und Ausgabegrenzen während der Präsidentschaftswahlen umgangen werden .
Es rechtfertigt nicht die Ergebnisse eines Berichts , in dem es heißt , die Anstrengungen des Weißen Hauses zur Ruhigstellung der Medien seien die „ aggressivsten ... seit der Nixon @-@ Regierung “ .
Und jüngstens kann es nicht die Unfähigkeit entschuldigen , in den mehr als drei Jahren seit der Verabschiedung des Affordable Care Act eine einfache Website zu entwerfen .
Ich weiß nicht , ob es das ist , was ich hätte erwarten sollen .
Ob ich mit 18 hätte verstehen sollen , dass die Regierungsarbeit den ihr vorangehenden politischen Kampagnen widersprechen könnte .
Offensichtlich ist das Abgeordnetenamt kein vorhersehbarer Kurs , da eine Oppositionspartei und zufällige Ereignisse wie das Newtown @-@ Massaker die öffentliche Diskussion prägen .
Doch wenn ich mir die oben genannten Beispiele ansehe , dann scheinen sie weitgehend von der Regierung selbst gewählt zu sein .
Und das stört mich am meisten .
Ich habe 2012 wieder Obama gewählt , nicht weil ich über seine Kandidatur begeistert war .
Mitt Romney stellte eine verwirrende und unausgegorene Alternative dar , er schien seine Richtung und Positionen nicht festlegen zu können .
Ich hatte den Eindruck , eine zweite Amtszeit für Obama , frei vom Druck künftiger Wahlen , würde die Hoffnung erfüllen , von der wir schon so lange gehört hatten .
Doch mit dem Sinken der Zustimmungswerte für Obama auf unter 45 % diese Woche ist die Rückkehr ins Jahr 2008 durch dieses Buch um so härter geworden .
Es weckt in mir die Sehnsucht nach den vielen Versprechen , die sich in Luft aufgelöst haben .
Diese Woche las ich einen Abschnitt in dem Buch , der beschreibt , wie Obama einen schweren Verlust gegen Clinton bei den Vorwahlen in Pennsylvania einstecken musste .
In einem Treffen mit den Wahlhelfern nach der Entscheidung sagte er seinen Mitarbeitern , sie müssten zurück auf Kurs kommen und dem Zweck ihrer Sache folgen .
„ Ich möchte , dass wir unseren Zauber wiederfinden “ , sagte er .
Wir müssen uns daran erinnern , wer wir sind .
Es sind fünf Jahre später , Mr. President , und ich könnte Ihnen nicht stärker zustimmen .
Die in diesem Kommentar ausgedrückten Ansichten sind ausschließlich die von Nathaniel Morris .
Clive Palmer behauptet , Premierminister Tony Abbott habe Interessenkonflikt beim Elternurlaub
Der Milliardär und Abgeordnete Clive Palmer sagt , Premierminister Tony Abbott stünde in einem Interessenkonflikt bei seinen Plänen zum Elternurlaub , weil seine Töchter schwanger werden und deshalb davon profitieren könnten .
Der Bergbaumagnat , der sich in einer gerichtlichen Auseinandersetzung über die Zahlung von 6 Millionen Dollar an CO2 @-@ Steuer befindet , stellte die Behauptung auf , als er Fragen vom Tisch wischen wollte , ob er sich in einem Konflikt befände .
Die Palmer United Party könnte bis zu vier Stimmen im Senat kontrollieren , die wichtig für die Entscheidung sind , ob die CO2- und Bergbausteuern gestrichen oder gekürzt werden .
Doch Palmer behauptete , dass nur Minister Interessenkonflikte haben könnten und die Töchter von Abbott persönlich von den Gesetzen profitieren würden .
„ Er befindet sich in einem großen Interessenkonflikt , wenn es um bezahlten Elternurlaub geht , denn wenn eine seiner Töchter schwanger wird , hat er ein direktes Interesse daran , ob sie Urlaub erhält oder nicht “ , sagte Palmer .
Zwei Monate nach der Wahl erklärte die Wahlkommission Palmer mit 53 Stimmen Vorsprung nach der Neuauszählung offiziell zum Gewinner des Sunshine @-@ Coast @-@ Sitzes von Fairfax .
Palmer forderte eine Überarbeitung des Prozesses zur Stimmauszählung , damit dieser schneller vonstatten gehe .
Tony Abbotts Töchter Frances und Bridget .
Sollten diese Wahlen zwei Monate nach dem Ende der Stimmabgabe entschieden werden ?
„ Wir brauchen ein besseres System “ , sagte er .
Weshalb sollten wir kein System haben , bei dem man hereinmarschiert , die Daten in einen Computer eingibt , sofort wählt und dann um 6 : 30 Uhr abends das Ergebnis hat ?
Palmer kritisierte auch die Verwendung von Bleistiften beim Markieren der Stimmzettel .
Verwendet man sie , weil man dann die Ergebnisse ausradieren kann , wenn sie einem nicht gefallen ?
Heutzutage mit Bleistiften abzustimmen ist unglaublich .
Die Wahlkommission hat die Optionen für eine elektronische Wahl geprüft und kürzlich einen gemeinsamen Gesetzesvorschlag mit Neuseeland veröffentlicht .
Palmer , 59 , erklärte , dass zu seiner Politik ein internationaler Flughafen für die Sunshine Coast gehöre und dass er sein neues Amt „ sehr ernst “ nehmen werde .
Bei einem öffentlichen Amt gehe es um den Dienst an der Öffentlichkeit .
„ Wir streben nach keiner Belohnung außer der der Geschichte , nämlich , dass wir in einer kritischen Zeit dieser Gemeinschaft dienen können “ , sagte er .
RBS suspendiert zwei Devisenhändler
Die Royal Bank of Scotland hat zwei Händler aus ihrer Devisenabteilung suspendiert , so zwei Personen , die mit der Situation vertraut sind ; dies ist ein weiteres Indiz dafür , dass die weltweite behördliche Ermittlung zu den mutmaßlichen Manipulationen am Währungsmarkt rasant an Fahrt aufnimmt .
Einige der größten Banken der Welt , einschließlich UBS , Barclays , Deutsche Bank und RBS , bestätigten , dass sie mit den Behörden bei den Ermittlungen im weltweit größten Finanzmarkt zusammenarbeiten , auf dem täglich 5,3 Billiarden US @-@ Dollar den Besitzer wechseln .
Die beiden Händler wären die ersten RBS @-@ Mitarbeiter , die in der sich ausweitenden Untersuchung suspendiert wurden , die der Skandal um das Libor @-@ Interbankengeschäft nach sich zieht .
Die Bank , die keinen Kommentar zu den Suspendierungen abgab , bestätigte diesen Monat , dass sie Informationsanfragen von Behörden erhalten habe .
„ Unsere Ermittlungen zu diesem Thema gehen weiter und wir kooperieren voll mit der FCA und anderen Regulierungsbehörden “ , sagte die Bank vor zwei Wochen .
Letzten Monat gaben der Situation nahestehende Personen an , dass die RBS die Aufzeichnungen von E @-@ Mails und Instant Messages , die von und an einen früheren Händler gesandt wurden , an die britische Aufsichtsbehörde , die Financial Conduct Authority , weitergeleitet habe .
Dieser Händler , Richard Usher , hatte die RBS 2010 verlassen und soll inzwischen von seiner derzeitigen Position als europäischer Leiter des Forex @-@ Spot @-@ Handels bei JPMorgan beurlaubt worden sein .
Rohan Ramchandani , Leiter des europäischen Spot Trading bei Citi , wurde diese Woche beurlaubt und Matt Gardiner , früher leitender Währungshändler bei Barclays und UBS , wurde diese Woche bei Standard Chartered suspendiert .
Keinem dieser Händler wurde irgendein Fehlverhalten vorgeworfen .
Zur Instant Message @-@ Gruppe von Usher gehörten Banker bei Barclays und der Citigroup , sagten der Situation nahestehende Personen .
UBS gab diese Woche bekannt , dass sie Schritte gegen einige ihrer Mitarbeiter unternommen habe , nachdem die Schweizer Regulierungsbehörde Finma erklärt hatte , dass sie eine mutmaßliche Manipulation des Devisenmarkts bei einer Reihe schweizerischer Banken untersuche .
Mindestens sechs Behörden weltweit – die Europäische Kommission , Finma , die Schweizer Wettbewerbsbehörde Weko , die FCA , das US @-@ amerikanische Justizministerium und die Hong Kong Monetary Authority – beschäftigen sich derzeit mit Vorwürfen , wonach Banker sich bei Transaktionen am Währungsmarkt abgesprochen haben sollen .
HSBC , Citigroup , JPMorgan und Credit Suisse haben außerdem interne Untersuchungen eingeleitet oder Informationsanfragen von Behörden erhalten , sagten mit der Situation vertraute Personen .
Banken durchkämmen Instant Messages und E @-@ Mails aus mehreren Jahren auf der Suche nach Fällen von Fehlverhalten .
Die Nachrichten über diese Untersuchungen hat die Händler in einem Bereich in Aufruhr versetzt , der in den letzten Jahren zu einem der profitabelsten der Trading @-@ Einheiten von Investmentbanken gehört hat , aber dieses Jahr unter Druck stand , weil niedrige Volatilität bei Währungen die Chancen für Spekulanten einschränkt .
Einige Banker haben versucht , die Affäre herunterzuspielen und sagten , dass es nahezu unmöglich sei , den ausgedehnten und hochgradig liquiden Devisenmarkt zu manipulieren , doch führende Händler sind der Ansicht , dass dies nicht unbedingt wahr sei .
Ein führender Händler bemerkte , dass trotz des enormen täglichen Volumens im Devisenhandel die Fragmentierung der Liquidität zwischen den verschiedenen Handelsplattformen und der zunehmende Einsatz eigener interner Plattformen durch Banken dazu führe , dass „ man schon mit sehr geringen Ticket @-@ Preisen den Markt beeinflussen kann “ .
Die Nachricht kam am selben Tag heraus , als Credit Suisse bekannt gab , sie habe diese Woche einem Händler ihres London Exchange Traded Funds @-@ Büros gekündigt , nachdem er Ende letzten Jahres einen Verlust von knapp sechs Millionen Dollar verursacht hatte .
Die Bank informierte prompt die zuständigen Behörden und arbeitet mit ihnen zusammen .
„ Wir sind sicher , dass der Händler allein gehandelt hat und dass die Angelegenheit eingedämmt ist “ , erklärte Credit Suisse .
Den Bauzaun auf dem Bechtle @-@ Grundstück bemalt
Eine Gruppe der Bürgerinitiative &quot; Schweizer Wiese &quot; hat den Bauzaun auf dem Bechtle @-@ Grundstück an der Kurpromenade in Bad Herrenalb verschönert .
Außerdem säuberte und verbreiterte sie den Fußweg , heißt es in einer Pressemitteilung .
Das geplante Abdecken des zerfallenden Hauses im hinteren Teil des Grundstücks war aus Sicherheitsgründen nicht erlaubt worden , denn das Gelände droht abzurutschen .
Alfred Abel , der das Grundstück derzeit verwaltet , hatte die Verschönerungsaktion mit seinem Kollegen Reinhard Domke von der BI abgesprochen .
Vor der Aktion der BI war ein Transparent mit der Botschaft &quot; Wir sind dafür &quot; angebracht worden .
Das störte die etwa 20 Mitglieder der Bürgerinitiative jedoch wenig bei ihrer Aktion .
Ihr Motto auf dem großen Plakat hieß &quot; Wir sind gegen Bauruinen &quot; .
Damit wollte sie auf die Gefahr von noch größeren Ruinen auf der Schweizer Wiese hinweisen - sollte das Riesenprojekt eines Tages scheitern .
Im Gespräch mit vielen Passanten vor der &quot; Baustelle &quot; wurde deutlich , dass manche Bürger glauben , dass es mit der Verwirklichung des Projektes der Stadt vielen besser gehen werde , obwohl nicht wenige die gleichen Fragen an die Dimension des vorgestellten Projekts haben wie die BI .
Aber sie fangen an zu resignieren , weil die Stadt diese Antworten weiter hinauszögert , heißt es vonseiten der BI .
Wie zu hören war , wirken sich auch die öffentlichen Äußerungen des Bürgermeisters aus .
Mai hatte in der Gemeinderatssitzung gesagt , dass er das Aus für das Thermalbad befürchtet , sollte die Bevölkerung beim Bürgerentscheid gegen die Pläne für einen Bade- und Wellnesskomplex auf der Schweizer Wiese stimmen .
Manche erscheinen deswegen geradezu verängstigt , andere empfinden sie als &quot; plumpen Erpressungsversuch &quot; an der Bevölkerung , heißt es in der Pressemitteilung der BI weiter .
Die BI dankte den Spendern für die Farbe und allen Helfern .
Rangnick @-@ Schelte für Schiris : Mane kein Schwalbenkönig
So zufrieden Ralf Rangnick mit der aktuellen Hochform von Bundesliga @-@ Tabellenführer Red Bull Salzburg auch ist , so enttäuscht zeigte sich der Sportdirektor der &quot; Bullen &quot; von den Schiedsrichtern .
&quot; Es gibt derzeit eine gefährliche Tendenz , dass Mane und Alan in die Kategorie Schwalbenkönige gedrängt werden &quot; , nahm er die beiden Offensivwirbler am Donnerstag auf einer Pressekonferenz in Salzburg in Schutz .
Jüngster Anlass für Rangnicks Kritik war Gelb für Mane beim 3 : 0 gegen Grödig am vergangenen Sonntag , bei dem dem Senegalesen eine angebliche Schauspielerei zum Verhängnis wurde - die freilich keine war , wie die TV @-@ Bilder zeigten .
&quot; Eine krasse Fehlentscheidung &quot; , meinte Rangnick , der Schiedsrichter Harkam als &quot; völlig überfordert &quot; bezeichnete .
Harkam hätte zudem &quot; seinen Teil &quot; zur Eskalation zwischen Salzburg @-@ Coach Roger Schmidt und Grödig @-@ Trainer Adi Hütter nach der Partie beigetragen .
Seinen deutschen Landsmann verteidigte er dezidiert : &quot; Da hätte ich mich in jeder einzelnen Situation gleich verhalten wie Roger Schmidt &quot; .
Schmidt selbst will nach dem Scharmützel mit Hütter keinen Kontakt mit seinem Kollegen gehabt haben .
Ich wüsste nicht , wieso .
&quot; Denn ich bin derjenige , der beleidigt wurde &quot; , betonte der 46 @-@ Jährige .
Angesichts des Erfolgslaufs stimmte Rangnick aber eine Lobeshymne an .
&quot; Dafür gibt es nur zwei Worte : Richtig gut &quot; , konstatierte er .
Es gibt nicht viel auszusetzen .
Vor allem die Art und Weise , wie die Mannschaft spielt , ist beeindruckend .
Das soll ruhig so weitergehen .
Kaderänderungen in der Winter @-@ Transferzeit werde es kaum geben .
Es gibt keine großartigen Gründe , etwas zu verändern .
&quot; Außer ein Spieler tritt mit dem Wunsch heran , dass er den Verein verlassen will &quot; , stellte Rangnick klar .
Supreme Court bestätigt Obamas Gesundheitsgesetz
Es ist ein großer Sieg für die Regierung Obama : Der US @-@ amerikanische Supreme Court entschied heute , dass das eng mit Barack Obama verknüpfte Gesundheitsgesetz verfassungsmäßig ist .
Mit fünf zu vier Stimmen urteilten die Richter , dass das Einzelmandat des Patient Protection and Affordable Care Act – es zwingt US @-@ amerikanische Bürger , bis 2014 eine Krankenversicherung abzuschließen oder eine Strafe zu zahlen – im Rahmen der Steuerautorität des Staates verfassungsmäßig ist .
Der oberste Richter John Roberts schlug sich auf die Seite der vier liberaleren Mitglieder der Kammer , während die Richter Scalia , Thomas , Alito und Kennedy dagegen entschieden .
Das Gericht bestätigte auch die restlichen Abschnitte des 2700 Seiten umfassenden Gesetzes und vertrat außerdem die Ansicht , die Vorgabe des Gesundheitsgesetzes , wonach Bundesstaaten entweder die Zugangsvoraussetzungen für Medicaid erweitern müssten oder ansonsten sämtliche staatlichen Medicaid @-@ Förderungen gestrichen würden , sei nicht verfassungswidrig einschränkend .
Das Klageverfahren gegen das Gesetz war von 26 Bundesstaaten und der National Federation of Independent Business angestrengt worden .
Das Gesetz war von allen führenden republikanischen Präsidentschaftskandidaten , einschließlich des letztendlichen Herausforderers Mitt Romney , im Vorwahlkampf 2012 entschieden abgelehnt worden .
Norwegen : Norwegischer Ort macht sich mit Riesenspiegeln Licht
Mit riesigen Spiegeln haben die Einwohner eines norwegischen Örtchens Licht in ihr düsteres Tal gebracht .
Wegen des niedrigen Sonneneinfallgrades versinkt das im Vestfjord @-@ Tal gelegene Rjukan von Herbst bis Frühling normalerweise im Schatten der umliegenden Berge .
Mit drei gigantischen Reflektoren in 45 Metern Höhe wurde am Mittwoch ein Jahrhunderttraum wahr .
&quot; Endlich ! &quot; , schwärmte Bürgermeister Steinar Bergsland bei der Startzeremonie im Sender TV2 .
Einige Talbewohner rückten sich Sonnenstühle zurecht , andere setzten sicherheitshalber Sonnenbrillen auf .
Bisher mussten Sonnenhungrige im Winter mit einer Seilbahn auf einen nahen Gipfel fahren .
Vor zehn Jahren hatte der lokale Künstler Martin Andersen den Vorschlag präsentiert , die Strahlen mit Spiegeln ins Tal zu lenken .
Diese Grundidee gab es aber schon seit 1913 im Ort .
Nach mehrjähriger Debatte hatte der Stadtrat schließlich das 5 Millionen Kronen ( rund 615 000 Euro ) teure Projekt verabschiedet .
Eine ähnliche Konstruktion verschafft seit einigen Jahren dem italienischen Alpenort Viganella winterlichen Sonnenschein .
Post leert kaum noch sonntags
&quot; Viele Bürger werden es noch nicht gemerkt haben , die roten Punkte für die Sonntagsleerung befinden sich noch an verschiedenen Briefkästen der Kernstadt und den Stadtteilen , aber liest man das Kleingedruckte an den gelben Behältern der Post AG , findet man schnell heraus , dass die Leerung an Sonn- und Feiertagen nicht mehr stattfindet &quot; , teilt die FDP mit .
Eine Anfrage der FDP habe das bestätigt .
An Sonn- und Feiertagen werde nur noch vor dem Postgebäude in der Ernst @-@ Ludwig @-@ Straße 36 und in der Jakob @-@ Müller @-@ Straße 1 in Hüttenfeld geleert .
Ob in Hofheim und Rosengarten auch noch Sonntag geleert wird , werde in der Antwort auf die Anfrage der FDP nicht beantwortet .
Der sozial- und jugendpolitische Sprecher der FDP , Fritz Röhrenbeck , will hier nachhaken .
Die Sonntagsleerung ist gerade bei Terminpost ein wichtiger Postservice .
&quot; Diesen dünnt diese Unternehmung trotz der Preiserhöhung für Briefe am Januar 2013 radikal und unzumutbar aus &quot; .
Thomas Bittner , Fraktions- und Stadtverbandsvorsitzender der Liberalen , unterstützt seinen Fraktionskollegen : &quot; Was mich ärgert , ist die Tatsache , dass hier klammheimlich die Leerungszeiten geändert oder auch gestrichen werden &quot; .
Von Bürgernähe ist die Post dabei meilenweit entfernt .
&quot; Mindestens müssen die Briefkästen in den Stadtteilen Neuschloß und Rosengarten wieder sonntags geleert werden &quot; , so Bittner und Röhrenbeck unisono .
Auch für die Kernstadt gelte , besonders nicht mobile Mitbürger müssten einen Briefkasten mit Sonntagsleerung auch fußläufig erreichen können .
Röhrenbeck fragte im Stadtparlament , ob die Stadtverwaltung Gespräche mit der Post über diese Sache plant .
Bürgermeister Erich Maier antwortete , die Post habe nicht mit Lampertheim kommuniziert .
Seines Wissens gebe es aber in Hofheim auch eine Sonntagsleerung .
Ihre Partei hat sich ja für Privatisierungen ausgesprochen .
&quot; Dann werden Entscheidungen an anderer Stelle getroffen &quot; , sagte Maier .
Frankfurter Parkgebühren sollen kräftig steigen
Parken in Frankfurt könnte bald empfindlich teurer werden .
Der Magistrat der Stadt berät heute Vormittag über eine Vorlage von Verkehrsdezernent Stefan Majer ( Grüne ) .
Demnach sollen die Parkgebühren um 50 Prozent erhöht werden .
Dafür sollen aber nicht die Preise angehoben , sondern das Zeitintervall von Parkuhren und Parkscheinautomaten von 30 auf 20 Minuten verkürzt werden .
Im Dezember muss dann noch die Stadtverordnetenversammlung entscheiden .
Der Einzelhandelsausschuss der IHK Frankfurt hält das &quot; für keine gute Idee &quot; .
Die Parkmöglichkeit unmittelbar vor dem Geschäft sei &quot; ein nicht zu unterschätzender Vorteil für kleinere Fachhändler &quot; .
Der Verkehrsclub Deutschland ist der Meinung , dass eine Erhöhung nach zwei Jahrzehnten &quot; durchaus angemessen und eigentlich längst überfällig &quot; ist .
Der öffentliche Nahverkehr werde auch teurer .
Freudenstadt : Schnelle Aktionen überrumpeln Gastgeber
Mit einem schmalen Kader mussten die Herren I des TSV Freudenstadt in der Schiller @-@ Schulturnhalle in Reutlingen gegen die TG Gönningen von der Schwäbischen Alb antreten .
Die Älbler standen zwar mit einer erfahrenen Mannschaft auf der anderen Netzseite .
Bald zeigte sich aber , dass sie , auch altersbedingt , mit den schnellen Aktionen der Freudenstädter nicht ganz mithalten konnten .
Mit den harten und platzierten Aufschlägen taten sich die Gönninger äußerst schwer .
Wiederholt verpassten sie die von Simon Schenk und Eduard Schulz sauber über die Netzmitte zugespielten Pässe und Angriffe und waren bei der Blockabwehr nicht zur Stelle .
Zwei hohe erste Satzgewinne drückten deutlich die Überlegenheit der Freudenstädter in allen Belangen aus .
Angesichts dieser erdrückenden und spielbestimmenden Leistung wurde dann der dritte Satz etwas lasch und lustlos zum 3 : 0 @-@ Endstand ( 25 : 13 , 25 : 14 , 25 : 22 ) gewonnen .
Da wird am 2. November mit dem TV Baiersbronn , der sich in Nagold klar durchsetzen konnte , ein wesentlich leistungsstärkerer Gegner auf dem Feld stehen .
TSV Freudenstadt I : Dominik Bäuerle , Yannik Büchle , Sebastian Dölker , Felix Pälchen , Stefan Räller , Simon Schenk und Eduard Schulz .
In der B @-@ Klasse standen sich in der Murgtalhalle in Baiersbronn die zweiten Mannschaften aus Baiersbronn und Freudenstadt gegenüber .
Sie lieferten ein hart umkämpftes Zwei @-@ Stunden @-@ Match ab .
Nervosität auf beiden Seiten verursachte vor allem bei der Ballannahme Fehler und Punktegeschenke ; auch bei den Pässen war die Präzision zuweilen Mangelware und in einigen kritischen Spielszenen verhinderte der Übereifer den Blick für mögliche Punktgewinne .
In dieser leistungsmäßig sehr ausgeglichenen Begegnung stimmte im TSV @-@ Team von Marcus Blasutto aber durchweg der große körperliche Einsatz und ein erfreuliches Engagement beider Teams .
Pflegetag an der kleinen Engländerhütte
Zum mittlerweile fünften Pflegetag in der Nachfolge des Natura 2000 @-@ Projektes oberer Hotzenwald traf sich eine Gruppe engagierter Teilnehmer bei der kleinen Engländerhütte in Ibach .
Aufgrund von Anregungen aus der Bevölkerung sollte an diesem Tag im Bereich der Hütte der Blick ins Tal freigeschnitten werden , sagte Bürgermeister Helmut Kaiser .
Viele Wanderer bezeichneten , so Kaiser , diesen Bereich als das Glanzstück des Schluchtensteigs , auf dem die Landschaft den idealen Rahmen für herrliche Ausblicke biete .
Er dankte den Anwesenden für ihre Bereitschaft zur Mitarbeit und betonte , der Pflegetag sei ein geeignetes Instrument , um die Verbindung von Mensch und Natur zu stärken .
Er biete jedem Bürger die Möglichkeit , in der Natur selbst Akzente zu setzen .
Zugleich mit dem touristischen Aspekt könne auch der ökologische Berücksichtigung finden .
Diesen ökologischen Aspekt erläuterte Friederike Tribukait von der Abteilung Naturschutz des Regierungspräsidiums Freiburg im Anschluss an die Begrüßung durch Landrat Tilman Bollacher , der die Schirmherrschaft übernommen hatte und der Aktion ein gutes Gelingen wünschte .
Das touristische Ziel des Weitblicks deckt sich laut Tribukait mit dem Ziel , das inzwischen stark zugewachsene alte Allmendweidfeld mit seinen spezifischen geschützten Lebensraumtypen zu erhalten durch Öffnung und Verbindung zu den noch bestehenden Weiden hin .
Bestimmte Arten wie etwa seltene Schmetterlinge und Grashüpfer können Barrieren in Form von Waldflächen nicht überwinden .
Sie benötigen diese freien Verbindungen zur Arterhaltung .
Tribukait sagte , sie wolle es an dieser Stelle nicht versäumen , eine Lanze zu brechen für das geplante Biosphärengebiet .
In diese Planung füge sich die aktuelle Maßnahme nicht nur nahtlos ein .
Ein Biosphärengebiet biete auch die Chance zu nachhaltiger ökonomischer wie ökologischer Entwicklung auf der Basis des international anerkannten Unesco @-@ Status und somit eine kontinuierliche Ergänzung des mit dem Life @-@ Projekt sowie den bisherigen Pflegetagen Erreichten für die Zukunft .
Nach diesen verschiedenen Ausführungen teilten Revierleiter Christoph Wehle und Life @-@ Projektmanagerin Cornelia Bischoff die Helfer in Gruppen ein .
Die größeren Bäume waren im Vorfeld bereits geschlagen worden , der Forstschlepper stehe gegebenenfalls abrufbereit .
Eine Gruppe von Helfern sollte sich um die Freistellung von Wacholderbüschen und um die Pflege eines Trockensteinriegels kümmern .
Ziel war die freie Sicht am Aussichtspunkt .
Löffingen : Köpfler immer noch einziger Kandidat
Informationen im Internet : Obwohl das Baarstädtchen Löffingen mit seinen 7514 Einwohnern , einer intakten Infrastruktur , einer zukunftsweisenden Schul- , Kinder- , Jugend- und Seniorenpolitik , sowie eigenen Stadtwerken als attraktive Stadt bezeichnet werden kann , hat sich bisher noch kein zweiter Bürgermeisterkandidat gemeldet .
Als einziger Kandidat um die Nachfolge des aus Altersgründen nicht mehr kandidierenden Bürgermeisters Norbert Brugger steht bisher der 46 @-@ jährige Bankkaufmann und Betriebswirt Dieter Köpfler aus Löffingen fest .
Die Bewerbungsfrist läuft am Montag , 11. November , um 18 Uhr ab .
Google , Samsung , Huawei wegen Nortel @-@ Patenten verklagt
Die Gruppe , die Tausende früherer Nortel @-@ Patente besitzt , strengte am Donnerstag eine Lawine von Klagen wegen Patentverletzung gegen Handyhersteller an , darunter auch Google , das Unternehmen , das bei der Insolvenzversteigerung von Nortel von ihm überboten wurde .
Rockstar , das Konsortium , das die Nortel @-@ Patente für 4,5 Milliarden US @-@ Dollar gekauft hatte , verklagte Samsung Electronics Co Ltd , HTC Corp , Huawei und vier andere Unternehmen wegen Patentverletzungen vor dem US @-@ Bezirksgericht in Texas .
Rockstar befindet sich im Gemeinschaftsbesitz von Apple , Microsoft , BlackBerry , Ericsson und Sony .
Google wird in sieben Fällen der Patentverletzung bezichtigt .
Die Patente beträfen Technologie , die Suchbegriffe im Internet mit relevanter Werbung in Übereinstimmung bringe , so die Klage , die damit den Kern von Googles Suchmaschinengeschäft trifft .
Vertreter von Samsung , Huawei , HTC und Rockstar waren nicht unmittelbar erreichbar .
Samsung , Huawei und HTC stellen Handys her , die mit Googles Betriebssystem Android arbeiten , das in scharfem Wettbewerb zu den Mobilprodukten von Apple und Microsoft steht .
Im Jahr 2011 gab Google ein anfängliches Gebot über 900 Millionen Dollar für die Nortel @-@ Patente ab .
Google steigerte sein Angebot mehrmals und bot zuletzt 4,4 Milliarden US @-@ Dollar .
Nachdem es bei den Nortel @-@ Patenten von Rockstar überboten wurde , erwarb Google Motorola Mobility für 12,5 Milliarden US @-@ Dollar , ein Geschäft , das auch zum Teil von Motorolas Bibliothek an Patenten motiviert war .
„ Obwohl Google mit seinem Versuch gescheitert ist , die Klagepatente bei der Auktion zu erwerben , hat Google die Patente verletzt und tut dies auch weiterhin “ , so das Klageschreiben .
Rockstar fordert einen hohen Schadensersatz von Google , da es behauptet , Googles Patentverletzung sei absichtlich , so die Anschuldigung .
Ägypten vereidigt ersten frei gewählten Präsidenten
Mohammed Mursi legt den Amtseid ab , doch sein Tag des Triumphs dürfte nicht das Ende der politischen Streitigkeiten in Ägypten bedeuten .
Der Islamist Mohammed Mursi versprach ein „ neues Ägypten “ , als er als erster frei gewählter Präsident des Landes vereidigt wurde und damit die Nachfolge von Husni Mubarak antrat , der 16 Monate zuvor aus dem Amt vertrieben worden war .
Mit seiner Amtseinführung vor dem obersten Verfassungsgericht wurde Mursi auch zum ersten frei gewählten islamistischen Präsidenten der arabischen Welt und Ägyptens fünftes Staatsoberhaupt seit dem Sturz der Monarchie vor ungefähr 60 Jahren .
Er legte den Eid vor den 18 in schwarze Roben gekleideten Richtern des Gerichts ab , das seinen Sitz am Nil hat und einem antiken ägyptischen Tempel nachempfunden ist .
„ Wir streben nach einer besseren Zukunft , einem neuen Ägypten und einer zweiten Republik “ , sagte Mursi bei der feierlichen Zeremonie , die live im staatlichen Fernsehen übertragen wurde .
„ Heute hat das ägyptische Volk das Fundament für ein neues Leben gelegt – absolute Freiheit , eine echte Demokratie und Stabilität “ , sagte der 60 @-@ jährige Mursi , ein in den USA ausgebildeter Ingenieur und Mitglied der Muslimbruderschaft , einer fundamentalistischen Gruppe , die seit ihrer Gründung vor 84 Jahren meist als verbotene Organisation von der jeweiligen Regierung scharf ins Visier genommen worden war .
Hunderte Soldaten und Polizisten bewachten das Gebäude , als Mursi kurz nach elf Uhr Ortszeit in einem kleinen Autokonvoi eintraf .
Nur ein paar Hundert Anhänger hatten sich vor dem Gericht versammelt , um dem neuen Präsidenten zuzujubeln , und im Gegensatz zum präsidialen Prunk aus der Mubarak @-@ Zeit wurde der Verkehr nur kurzzeitig angehalten , damit der Autokonvoi die üblicherweise belebte Straße überqueren konnte , die das Stadtzentrum mit den südlichen Vorstädten verbindet .
Als uncharismatisches „ Ersatzrad “ der Bruderschaft verspottet hat sein persönliches Prestige seit seinem Sieg und einer Freitagsrede zugenommen , bei der er sich nicht nur als Kandidat der Islamisten , sondern all derer präsentierte , die die Bestrebungen des Aufstands aus dem Jahr 2011 gegen den autoritären Mubarak ans Ziel bringen wollten .
„ Ägypten ist heute ein ziviler , nationaler , verfassungsmäßiger und moderner Staat “ , erklärte der in einen blauen Anzug mit roter Krawatte gekleidete Mursi den Richtern in der holzgetäfelten Kammer , in der er den Amtseid ablegte .
Später fuhr Mursi zur Universität von Kairo , wo er seine Antrittsrede halten sollte .
Er wurde offiziell von einer Armeekapelle begrüßt , die die Nationalhymne spielte , der er in Habachtstellung zuhörte .
Der Militärführer Feldmarschall Hussein Tantawi war anwesend .
Bei seiner Ankunft wurde er von Hunderten Anwesenden im größten Hörsaal der Universität mit Sprechchören von „ Die Armee und das Volk sind eine Hand “ begrüßt .
Die im Jahr 1908 als Bastion säkularer Bildung errichtete Universität von Kairo hat sich in den 1970er Jahren zu einer Hochburg islamistischer Studentengruppen entwickelt .
Mursi legte am Freitag einen symbolischen Eid auf dem Tahir @-@ Platz ab , der Geburtsstätte des Aufstands , der letztes Jahr zum Ende der autoritären Herrschaft Mubaraks führte , und er gelobte , präsidiale Machtbefugnisse zurückzufordern , die der Militärrat vom aus dem Amt gejagten Staatschef übernommen hatte .
Doch mit dem Ablegen des offiziellen Eides vor dem Gericht und nicht wie üblich vor dem Parlament beugt er sich dem Willen des Militärs , was darauf hinweist , dass der Machtkampf weitergehen wird .
Mursis Rede auf dem Tahir @-@ Platz war voller dramatischer populistischer Gesten .
Falkenberger Discothek sorgt für zwei tollen Abende
Die neue Saison in der Falkenberger Discothek &quot; Blue Velvet &quot; hat begonnen .
Am heutigen Freitagabend heißt es &quot; Pump this party &quot; , am morgigen Samstagabend geht es mit einer Ü 25 @-@ Party weiter .
Fette Beats und coole Sounds werden von den Veranstaltern natürlich an beiden Tagen versprochen .
Arbeiter stürzte von Leiter : schwer verletzt
Beim Auswechseln eines defekten Außenfühlers stürzte am Donnerstag ein 51 @-@ jähriger Arbeiter in Eggelsberg von einer Leiter und verletzte sich schwer .
Der Mann aus Lamprechtshausen wollte an der Außenfassade eines Gasthauses einen defekten Heizungsfühler auswechseln .
Als er auf die an die Dachrinne angelehnte Leiter stieg , rutschte diese weg und der Mann stürzte auf den Betonboden .
Er erlitt schwere Verletzungen und wurde mit dem Rettungshubschrauber &quot; Christophorus 6 &quot; in das Landeskrankenhaus Salzburg gebracht .
Vergewaltiger in Südafrika : zweimal lebenslange Haft
Neun Monate nach der brutalen Vergewaltigung und Verstümmelung eines 17 @-@ jährigen Mädchens in Südafrika ist der Täter am Freitag zu zweimal lebenslänglich verurteilt worden .
Dies berichtete der Sender SABC .
Das Opfer war später an den Folgen der schweren Verletzungen gestorben .
Johannes Kana war bereits Anfang der Woche des Verbrechens für schuldig befunden worden .
Die Tat hatte landesweit Entsetzen ausgelöst .
Der damals 21 @-@ Jährige hatte Anene Booysen im Februar in einem Industriegelände in Bredasdorp nahe Kapstadt vergewaltigt .
14 Stunden kämpften die Ärzte um das Überleben des Opfers , jedoch vergeblich .
Der Anblick der Jugendlichen war so entsetzlich , dass die Pfleger und Schwestern psychologischen Beistand brauchten .
Kana hatte während des Prozesses zugegeben , in der Tatnacht mit Booysen in einer Bar gewesen zu sein .
Er gestand auch , sie geschlagen und vergewaltigt zu haben , jedoch bestritt er , für den Tod des Mädchens verantwortlich zu sein .
Die Polizei war zunächst von mehreren Tätern ausgegangen , entließ jedoch zwei Verdächtige aus der Haft , weil die Beweise gegen sie nicht ausreichten .
Auch die Staatsanwaltschaft betonte während des Verfahrens , sie sei überzeugt , dass Kana zum Zeitpunkt der Attacke allein war .
Vergewaltigungen gehören in Südafrika schon fast zum Alltag : Jährlich gibt es etwa 64 000 Anzeigen wegen sexueller Gewalt .
Das sind fast zehnmal so viel wie in Deutschland , das aber mit 82 Millionen Menschen deutlich mehr Einwohner hat als Südafrika ( 50 Millionen ) .
Polizei und Frauenverbände in Südafrika schätzen die Dunkelziffer bei sexueller Gewalt aber auf das 10- bis 25 @-@ fache .
Jumbo besucht den Schwarzwälder Schinken
Jumbo auf der Suche nach dem &quot; besten Schinken der Welt &quot; : Für die TV @-@ Sendung &quot; Galileo &quot; besuchte der Pro7 @-@ Star Bonndorf .
Der Sprecher stellt gleich zu Beginn klar : Das wichtigste für den Schinken sind die Schweinekeulen , Turbomast ist dabei keine gute Voraussetzung .
Kann Schinken , den man in jedem Supermarkt bekommt , also ein Qualitätsprodukt sein ?
Uli als Chef der großen Schinkenfabrik im Schwarzwald erklärt Jumbo die Arbeitsweise der Firma &quot; Adler &quot; in Bonndorf .
&quot; Deutschlands liebster Schinken &quot; , wie Jumbo den Schwarzwälder Schinken ankündigt .
Nur mit Haar @-@ Schutz und Kittel kommt er ins Innere der Fabrik .
Auch Jumbo muss sich erstmal die Hände desinfizieren , bevor er zum Mikro greifen darf .
Jumbo zur Stärkung bei Schnellimbiss in Waldshut gesichtet
&quot; Hier wird mir rießigen Mengen gearbeitet &quot; , staunen die Fernseh @-@ Macher , Schwarzwälder Schinken als Massenprodukt .
16.000 Keulen pro Woche sprechen für sich .
Gewicht , Fettanteil , Farbe : Uli erklärt worauf es bei der Qualität ankommt .
Die meisten Schweine werden mit sechs Monaten geschlachtet .
Fernsehen mit Niveau ?
Auch Einzelheiten wie der Ph @-@ Wert des Fleisches spielen eine Rolle .
Je dunkler das Fleisch , desto höher der ph @-@ Wert .
&quot; Da bin ich gespannt , wenn ihr Roberto Blanco messt , was dann passiert &quot; , so Jumbo zynisch .
Hier wird das Niveau des Privatfernsehens in Reinkultur präsentiert .
Aber das Zuschauen lohnt sich trotzdem .
Der Zuschauer sieht , dass das Zerlegen der Keulen weiterhin Handarbeit ist .
Denn : Schwarzwälder Schinken ist traditionell ohne Knochen im Regal zu finden .
Das Geheimnis des Schinkens ist die Gewürzmischung mit dem Salz .
Rauchturm und Rauchfeuerung erinnern Jumbo optisch an ein &quot; U @-@ Boot &quot; .
Der Trick : Tannenzweige sorgen hier im Rauch für den besonderen Geschmack des Schwarzwälder Schinkens .
20 Tage im Rauch machen den Schinken schließlich fast schwarz .
&quot; Jetzt verschwindet die Scheibe im Jumbo &quot; , kündigt er die Test @-@ Verspeisung an .
&quot; Der ist richtig lecker &quot; , so das Fazit des TV @-@ Stars .
Damit werden alle Beteiligten leben können .
Sie dachten , Reisebüros gehören dank Internet der Vergangenheit an ?
Flight Centre scheint sich dem Trend zu widersetzen .
Das Unternehmen hat seine Gewinnaussichten für das Gesamtjahr erhöht und erwartet Rekordeinnahmen von Urlaubern in Australien und Großbritannien .
Das Reiseunternehmen geht jetzt von einem bereinigten Jahresgewinn vor Steuern zwischen 325 und 340 Millionen Dollar aus , verglichen mit 305 bis 315 Millionen Dollar in seiner früheren Prognose .
Wenn die aktuellen Zielwerte erreicht werden , dann bedeutet das ein Wachstum von 12 bis 17 Prozent im Vergleich zum Rekordgewinn von 290,4 Millionen Dollar im Zeitraum 2011 / 12 .
Wie Geschäftsführer Graham Turner bekannt gab , erzielte Flight Centre im ersten Halbjahr acht Prozent Gewinn und verbuchte einen starken Start ins zweite Halbjahr , besonders im australischen und britischen Privatgeschäft .
„ Seit Jahresbeginn sind unsere zehn Länder profitabel und einige davon befinden sich auf gutem Wege in Richtung Rekordjahreseinnahmen vor Zinsen und Steuern “ , erklärte er .
Dazu gehören Australien und Großbritannien , die typischerweise zu unseren stärksten Ergebnisträgern gehören .
In Australien hat sich die Freizeitbranche in der zweiten Jahreshälfte erholt , was einen leicht schwächeren Markt für Geschäftsreisen ausglich .
Ähnlich gut lief es für das Freizeitgeschäft von Flight Centre in Großbritannien , während auch hier die Geschäftskunden weniger ausgaben .
Das US @-@ Geschäft erholte sich gegenüber dem saisonbedingt schwächeren ersten Halbjahr , sodass für das dritte Jahr in Folge ein Gewinn für das Gesamtjahr erwartet wird .
Die Aktien von Flight Centre stiegen gestern um 3 Cent auf 38,20 Dollar .
Schulen werden zu größerem Fokus auf Mathematik , Rechtschreibung und Grammatik angehalten
In Kursen zu englischer Literatur müssen Schüler künftig mindestens ein Stück von Shakespeare , einen Roman des 19. Jahrhunderts , romantische Lyrik und zeitgenössische britische Romane ab 1914 behandeln .
In die Prüfung finden auch „ ungesehene Texte “ Eingang , um zu breiterem Lesen anzuregen .
Der kombinierte Kurs aus englischer Literatur und Sprache wird abgeschafft .
Ab 2015 müssen Schüler eine eigenständige GCSE @-@ Prüfung für Sprache ablegen , wobei es starke Anreize dafür gibt , englische Literatur als separate Qualifikation zu wählen .
Das Bildungsministerium wird morgen die neuen Lehrpläne für Englisch und Mathematik veröffentlichen – die ersten Fächer , die radikal umgestaltet wurden .
Andere Kernfächer werden nächstes Jahr geändert .
In einer separaten Initiative wird Ofqual , die Aufsichtsbehörde für Prüfungen , eine Neuorganisation der GCSE @-@ Strukturen bekannt geben , einschließlich eines neuen Benotungssystems und weniger Kursarbeit .
In einer Rede im Sommer sagte Bildungsminister Michael Gove , dass es einen „ breiten Konsens gibt , dass wir unser Prüfungssystem reformieren müssen , um das öffentliche Vertrauen wiederherzustellen “ , wobei er betonte , die GCSEs würden „ herausfordernder , ambitionierter und strenger “ werden .
Studien zeigen , dass in englischen Schulen weniger Zeit für Mathematik aufgewendet wird – 116 Stunden pro Jahr oder drei Stunden wöchentlich pro Schuljahr – als in den meisten anderen Ländern .
Demgegenüber unterrichten australische Schulen durchschnittlich 143 Stunden jährlich und Schüler in Singapur erhalten 138 Stunden .
Zwar wird es keine formelle Anforderung geben , im Stundenplan mehr Zeit für Mathematik vorzusehen , doch aus Koalitionskreisen heißt es , die umfassende Matheprüfung – kombiniert mit einer stärkeren Gewichtung des Fachs in Ranglisten – werde Schulen vermutlich dazu ermutigen , mehr Stunden anzusetzen .
Im Lehrplan wird mehr Augenmerk auf „ Probleme aus dem richtigen Leben “ gelegt , einschließlich Finanzmathematik .
Schöne Tiere und leckere Torten locken
Die schönsten Kaninchen verschiedener Rassen und Farbenschläge präsentiert die Kreisverbandsleistungsschau an diesem Wochenende im Bürgerhaus .
Die Bewertungen wurden bereits am Donnerstag vorgenommen
Erneut richtet der Ortsverein W514 diese große Ausstellung aus .
Züchter der im Kreis Soest bestehenden Vereine zeigen hier ihre besten Tiere wie auch junge Wickeder Hobbyhalter ihre Kaninchen .
Am Donnerstag nahmen sechs Preisrichter die Bewertung der zahlreichen Kaninchen vor und konnten dabei herausragende Tiere auszeichnen .
Die Besucher der Schau werden bestens informiert , da die Beurteilung aller Tiere an den Käfigen angebracht ist .
Die offizielle Eröffnung der Ausstellung nimmt Bürgermeister Hermann Arndt Samstag um 14.30 Uhr vor .
Für alle Besucher geöffnet ist die Kaninchenschau am Samstag bereits ab 10 Uhr sowie am Sonntag von 10 bis 15.30 Uhr , woran sich die Siegerehrung anschließt .
Die Gäste sind auch zu einer mit stattlichen Sachpreisen bestückte Tombola und zu einer lecker bestückten Cafeteria eingeladen .
Pamela Anderson trennt sich von ihren legendären blonden Locken und tritt erstmals mit neuem Bubikopf auf .
Pamelas blonde Locken sind seit ihrer Rolle in der Fernsehserie Baywatch berühmt .
Pamela Anderson ist der neueste Star , der seine Fans mit einem drastischen neuen Haarschnitt schockiert .
Die ehemalige Baywatch @-@ Schönheit hat sich zugunsten eines platinblonden Kurzhaarschnitts von ihren langen blonden Locken getrennt .
Ihren neuesten Look präsentierte die 46 @-@ jährige Schauspielerin am Mittwoch in Los Angeles und stellte auch gleich einen Schnappschuss auf ihre Twitter @-@ Seite .
Es ist das erste Mal seit 20 Jahren , dass das blonde Sexsymbol kurze Haare hat , und wir lieben die sittsame Veränderung .
Was halten Sie von Pammys Haar ?
Verraten Sie uns Ihre Meinung unten in den Kommentaren .
Salem : Johanna Rahner beim Ökumenischen Gesprächsforum
Beim nächsten Ökumenischen Gesprächsforum am Montag , 21. Oktober , im Neuen Museum des Schlosses geht es um das Thema &quot; Zur Hölle mit der Hölle - Theologische Überlegungen zum heutigen Umgang mit den letzten Dingen &quot; .
Referentin ist Professorin Johanna Rahner .
Das Ökumenische Gesprächsforum ist eine Initiative der katholischen und evangelischen Kirchengemeinden Salem , des Schlosses Salem und des Kulturamtes Bodenseekreis .
Johanna Rahner will im Forum der Frage nachgehen , wie denn heute die Menschen die &quot; letzten Dinge &quot; nach dem Tod einstufen .
Hätten die Menschen in den vergangenen Jahrhunderten davon zu viel gewusst und dabei auf jene Bilder von Himmel und Hölle gesetzt , &quot; die bis heute unsere Vorstellungen prägen &quot; , so zeichne sich die zeitgenössische prophetische Lehre von den Hoffnungen auf Vollendung eher durch eine gewisse Verlegenheit oder gar Sprachlosigkeit aus .
&quot; Die größere Hoffnung ist Christinnen und Christen durch die Religionskritik gehörig ausgetrieben worden &quot; , sagt die Referentin .
Sie habe &quot; uns mit so vielen Fragezeichen versorgt , dass uns die Ausrufezeichen abhanden gekommen zu sein scheinen &quot; .
Johanna Rahner sagt weiter : &quot; Doch die entscheidende Herausforderung bleibt das Ärgernis des Todes &quot; .
Damit verbunden sei die Frage nach jener Sehnsucht , &quot; die davon träumt , dass am Ende alles gut sein möge &quot; .
Johanna Rahner , 1962 geboren in Baden @-@ Baden , studierte von 1982 bis 1989 Katholische Theologie und Biologie an der Albert @-@ Ludwigs @-@ Universität Freiburg .
Sie promovierte 1997 zum Dr. theol . , ebenfalls in Freiburg .
Die Habilitation für Fundamentaltheologie und Ökumenische Theologie folgte 2003 an der Westfälischen Wilhelms @-@ Universität .
Seit 2010 hat Johanna Rahner einen Lehrstuhl für Systematische Theologie am Institut für Katholische Theologie der Universität Kassel inne .
Geislingen : Mehr als 100 junge Katholiken vom Kleinen Heuberg bekräftigen bei der Firmung ihr Glaubensbekenntnis
In zwei Gottesdiensten sind 101 15- und 16 @-@ jährige Jugendliche der Seelsorgeeinheit Am Kleinen Heuberg gefirmt worden .
Den Gottesdienst begleitete am Vormittag die Gruppe Laudato @-@ Si , am Nachmittag der Jugendchor The Spirit .
Mit dem Empfang des Firmsakraments sagten die Jugendlichen Ja zu ihrer Taufe und erbaten die Kraft des Heiligen Geistes .
Die Firmlinge hatten sich in den vergangenen Monaten , unter der Leitung von Diakon Reiner Dehner und der Mithilfe zahlreicher Gemeindemitglieder auf den großen Festtag vorbereitet .
In unterschiedlichen Projekten lernten sie dabei verschiedene Aufgaben des christlichen Gemeindelebens kennen und erlebten gemeinsam den Jugendtag in Untermachtal .
Illmensee : Zweites Mountainbike @-@ Rennen begeistert Teilnehmer
Bei herrlichem Wetter kamen 214 Fahrradfahrer nach Illmensee , um den Rundkurs über die Hügelketten rund um den See zu bewältigen .
Das teilt Ulrich Knobel vom veranstaltenden Sportverein Illmensee mit .
Unter den Teilnehmern waren , insbesondere auf der Kurzdistanz über 15 Kilometer und 300 Höhenmeter , auch zahlreiche Jedermannsradler , die ihr Hobby einmal in Wettkampfatmosphäre ausüben wollten .
Zwei Juniorenfahrer der deutschen Spitzenklasse waren in diesem Wettkampf ebenfalls am Start : Felix Bader aus Bad Waldsee und Pascal Treubel aus Aach @-@ Linz kamen mit der Empfehlung gute Platzierungen bei den Deutschen Meisterschaften .
Diese Beiden konnten setzten sich erwartungsgemäß vom Feld ab .
Wie im Vorjahr konnte Felix Bader einen kleinen Zeitvorsprung bis ins Ziel retten und verteidigte seinen Titel als Gesamtsieger der Kurzdistanz .
Auf Platz zwei konnte sich erneut Pascal Treubel platzieren .
Bei den Damen war es Theresa Duelli vom Team Albtraum , die es ganz oben aufs Siegertreppchen schaffte .
Auf Platz zwei und drei kamen Anne Adel aus Illmensee und Leonie Treiber aus Owingen .
Eine erfreuliche Entwicklung ist die zunehmende Anzahl von Fahrern , die in der Gemeinde wohnen oder arbeiten .
Nicht nur was das Leistungsvermögen betrifft , war die ganze Bandbreite an Sportlern vertreten .
Auch die Altersstruktur reichte von zehn Jahren bei den Jüngsten bis zu über 70 Jahren bei den ältesten Startern .
Im Hauptrennen waren in diesem Jahr noch mehr absolute Topathleten am Start .
Vier Fahrer konnten sich von den regionalen Spitzenfahrern absetzen .
Darunter Philipp Pangerl , ein Mountainbike @-@ Halbprofi vom Black @-@ Tusk @-@ Racing @-@ Team .
Pangerl war zusammen mit einem Teamkollegen bereits zwei Mal Weltmeister im Zwölf @-@ Stunden @-@ Fahren .
In diesem Jahr wurde er Europameister in dieser Spezialdisziplin .
Mit dabei auch Roland Ballerstedt , der bereits zwei deutschen Meistertitel im Duathlon sein Eigen nennt .
Nach 45 Kilometern und 900 Höhenmetern kam es zu einem Wimpernschlagfinale im Zieleinlauf vor der Drei @-@ Seen @-@ Halle .
Pangerl raste als Erster über die Ziellinie .
Nur eine Sekunde dahinter konnte sich der Routinier Ballerstedt den zweiten Platz in der Gesamtwertung sichern .
Zeitgleich kamen dann Hermann und Warthmann als Dritte der Gesamtwertung ins Ziel .
In der Damenwertung war Christiane Cohsmann die Zeitschnellste im Hauptrennen .
Den zweiten Platz sicherte sich Areane Blersch aus Binzwangen vor Natascha Werner aus Stuttgart .
Sportler und Helfer zeigten sich sehr zufrieden mit dem reibungslosen und gut organisierten Ablauf der Veranstaltung .
Unterwegs durch Schlamm , Flüsse und Dschungel für kostenlose medizinische Versorgung
Dr. Georges Bwelle bringt kostenlose medizinische Hilfe in entlegene Dörfer in Kamerun
Bwelle und sein Team verbringen beinahe jedes Wochenende damit , Hunderte von Patienten zu behandeln
In dem westafrikanischen Land gibt es nicht viele Ärzte , nur einen für 5.000 Menschen
Stimmen Sie hier oder mit Ihrem Mobilgerät ab
Dr. Georges Bwelle gehört zu den Top 10 der „ CNN Heroes of 2013 “ .
Sie können für ihn oder einen der anderen Helden in den Top 10 abstimmen , um ihn zum „ CNN Hero of the Year “ zu wählen .
Der Sieger erhält 250.000 Dollar zur Fortsetzung seiner außergewöhnlichen Arbeit .
21 Jahre lang sah Georges Bwelle mit an , wie sein kranker Vater immer wieder das Bewusstsein verlor und zu Krankenhäusern reiste , die nicht über die Mittel verfügten , um ihm zu helfen .
Jamef Bwelle wurde 1981 bei einem Autounfall in der Nähe von Yaoundé , der Hauptstadt Kameruns , verletzt .
Zuerst hatte er nur einen gebrochenen Arm , doch dann bildete sich eine Entzündung , die sich auf sein Gehirn ausweitete und dort ein Hämatom verursachte , das ihn für den Rest seines Lebens beeinträchtigen sollte .
„ Es gab keine Neurochirurgen in Kamerun “ , so Georges Bwelle .
Wir hätten ihn aus Kamerun herausgebracht , wenn wir das Geld gehabt hätten .
Stattdessen verbrachte Bwelle Jahre damit , seinen Vater in überfüllte Kliniken und Hospitäler zu begleiten , um dort die Behandlung zu bekommen , die sie zu bieten hatten .
„ Es ist nicht einfach “ , kommentiert Bwelle .
Man kann um fünf Uhr morgens das Haus verlassen und zum Krankenhaus rennen , um der Erste zu sein , und ist doch nicht Erster .
Es gibt sehr viele Patienten .
Einige Menschen sterben sogar , weil sie warten müssen .
Die Situation hat sich kaum verändert , seit Bwelles Vater 2002 starb .
In Kamerun gibt es nur einen Arzt für je 5.000 Menschen , so die Weltgesundheitsorganisation .
Demgegenüber liegt das Verhältnis in den Vereinigten Staaten bei einem Arzt für 413 Personen .
Doch selbst wenn es einen Arzt für sie gäbe , könnten sich die meisten Kameruner den Besuch nicht leisten .
Zwei von fünf Menschen im Land leben unterhalb der Armutsgrenze und nahezu Dreiviertel der Gesundheitsausgaben im Land sind privat .
„ Das einzige Problem , das sie haben , ist die Armut “ , sagt Bwelle .
Und die Armut macht es unmöglich , das Leben zu genießen .
Seinen Vater und so viele seiner Landsleute leiden zu sehen ließ in Bwelle den Entschluss reifen , etwas dagegen zu unternehmen .
Dr. Georges Bwelle und sein Freiwilligenteam haben im letzten Jahr 700 kostenlose Operationen durchgeführt .
Er wurde selbst Arzt und arbeitet als Gefäßchirurg im Central Hospital in Yaoundé .
Außerdem gründete er eine gemeinnützige Organisation namens ASCOVIME , die an Wochenenden in ländliche Gegenden reist und dort kostenlose medizinische Versorgung anbietet .
Seit 2008 haben er und seine Freiwilligengruppe knapp 32.000 Menschen geholfen .
Beinahe jeden Freitag zwängen er und bis zu 30 Leute sich in Kleinbusse und fahren mit der verschnürten medizinischen Ausrüstung auf dem Dach über unbefestigtes Terrain in die Dörfer , die Hilfe benötigen .
Nicht immer verläuft alles reibungslos .
Schon mehr als einmal mussten sie die Fahrzeuge durch Flüsse und Schlamm schieben .
Doch wenn sie ankommen , werden sie wie Helden empfangen : ein Festessen , Gesang und Tanz und die beste Unterbringung , die der Ort zu bieten hat .
In diesen Dörfern ist kostenlose medizinische Versorgung wirklich ein Grund zum Feiern und Bwelle – mit seinem breiten Lächeln und seiner grenzenlosen Energie – ist gerne bei der fröhlichen Feier dabei .
Am nächsten Morgen beginnt das Team dann mit der Untersuchung von Hunderten von Patienten .
„ Pro Fahrt behandeln wir 500 Personen “ , so Bwelle .
Sie kommen aus einem Umkreis von 60 Kilometern um das Dorf – und das zu Fuß .
Jede dieser Wochenendkliniken bietet medizinische Versorgung in einer Reihe von Bereichen an .
Viele Leute werden wegen Malaria , Tuberkulose , Unterernährung , Diabetes , Parasiten und sexuell übertragbaren Krankheiten behandelt .
Andere erhalten Krücken , gespendete Brillen oder kostenlose Geburtsurkunden – ein Dokument , das für die Schule erforderlich ist , sich aber viele arme Familien einfach nicht leisten können .
Abends führt das Team einfache Operationen mit örtlicher Betäubung aus .
Die Operationen finden normalerweise in einer Schule , dem Rathaus oder einer Wohnung statt ; nach dem Eingriff stehen die Patienten auf und gehen in den Erholungsbereich , um Platz zu machen für den Nächsten .
Die Beleuchtung für den OP und die Desinfektionsausstattung wird vom Generator der Gruppe gespeist und so arbeiten Bwelle und seine Freiwilligen bis in die frühen Morgenstunden am Sonntag .
Es ist ein anstrengendes Pensum , aber die Dorfmusiker helfen normalerweise , das Team motiviert zu halten .
„ Sie trommeln die ganze Nacht , damit wir wach bleiben und unsere Arbeit fortsetzen können “ , sagt Bwelle .
Am Sonntag fährt das Team dann zurück in die Stadt , müde , aber stolz auf die geleistete Arbeit .
Die Gruppe – eine Mischung aus kamerunischen Ärzten und ausländischen Medizinstudenten – hat im letzten Jahr 700 kostenlose Operationen durchgeführt und weiß , dass sie mit ihrer Arbeit einen enormen Unterschied für die Menschen bewirkt , denen sie hilft .
Ein Mann erklärte , dass die kostenlose Operation eines Leistenbruchs , die er erhalten habe , ihm nun ermögliche , wieder zu arbeiten .
„ Das verändert die Zukunft meiner Familie “ , meinte der Mann .
Neben den Wochenendkliniken und seiner Arbeit als Chirurg im Krankenhaus arbeitet Bwelle auch nachts in privaten Kliniken in Yaoundé .
Mit diesem zweiten Job finanziere er 60 % seiner gemeinnützigen Tätigkeit , so Bwelle ; der Rest stamme aus privaten Spenden .
„ Ich weiß wirklich nicht , wann er schläft “ , sagt Katie O &apos; Malley , die im zweiten Jahr an der Drexel University in Philadelphia Medizin studiert und freiwillig in Bwelles Gruppe mitarbeitet .
Er ist immer entweder im Krankenhaus oder versucht , Geld für die Organisation aufzubringen , damit er auf diese Kampagnen gehen kann .
Für Medizin- und Krankenpflegestudenten wie O &apos; Malley , die aus den USA und Europa kommen und Bwelle unterstützen , ist dies eine Chance , praktische Erfahrungen zu sammeln , die sie zu Hause nie bekommen würden .
„ Wir können bei Operationen dabei sein , wo wir helfen , Blut abzutupfen oder die Instrumente für Dr. Bwelle halten “ , erklärt O &apos; Malley .
Das wäre in Amerika als Medizinstudent im zweiten Jahr niemals möglich .
Die Studenten bezahlen ihre Reise nach Kamerun normalerweise selbst und bringen häufig gespendetes Sanitätsmaterial mit .
Sind sie aber erst einmal in Yaoundé , übernimmt Bwelle die Unterbringung , den Transport und die Anleitung .
„ Er ist ganz ohne Zweifel ein Held “ , sagt O &apos; Malley .
Er widmet sein Leben dieser Organisation und sein Wunsch , dem kamerunischen Volk zu helfen , kennt keine Grenzen .
Für Bwelle ist die beinahe ständige Arbeit keine Belastung .
Anderen zu einem glücklicheren Leben zu verhelfen und damit ein Versprechen zu erfüllen , das er seinem Vater gegeben hat , bereitet ihm große Freude .
„ Ich bin so glücklich , wenn ich diese Arbeit mache “ , meint Bwelle .
Und ich denke an meinen Vater .
Ich hoffe , er sieht , was ich tue .
Ich mache es , um Menschen wieder zum Lachen zu bringen und um die Schmerzen zu lindern .
Besuchen Sie die Website von ASCOVIME und erfahren Sie , wie Sie helfen können .
Exzellent den Kampf gemeistert
Die Rolle des Santiago , dem alten Mann in Hemingways Novelle &quot; Der alte Mann und das Meer &quot; , ist Horst Janson auf den Leib geschnitten .
Janson ist selbst ein alter Hase in seinem Metier , der Schauspielkunst .
Dem alten Mann Santiago kann keiner beim Fischfang etwas vormachen .
So ergänzen sich die beiden einfach großartig .
Man meint fast , die Falten im Nacken des alten Mannes , von denen der Fischerjunge Manolo spricht , sehen zu können .
Wenn Santiago müde vom Leben gebeugt auf dem Stuhl sitzt , ist das bei Janson echt .
Daneben ist die Rolle des alten Fischers durch und durch eine Charakterrolle , die Janson exzellent meistert .
Hemingway erzählte die Geschichte eines Kämpfers , eines mutigen Mannes , der nicht aufgibt und letztendlich durch sein Wissen und auch seine Willensstärke den Kampf gegen den Fisch gewinnt .
Janson ist in weiten Strecken als Alleindarsteller auf der Bühne .
Er schafft es , die Aufmerksamkeit des Publikums auf sich zu fokussieren , so dass seine Monologe keinen Moment langweilig sind .
Seine Anstrengungen , den Fisch endlich an die Oberfläche des Wassers zu ziehen , sind so echt , dass die Zuschauer vergessen , dass das Meer doch nur aus blau beleuchteten Wasserflaschen besteht .
Regisseur Jens Hasselmann lässt den alten Mann im Boot vor dem Fischerdorf agieren .
Im Verlauf der Aufführung setzt er die jeweils aktive Szene ins Licht : Die Hütte von Santiago , die Bar der Sängerin Marie @-@ Luise Gunst , die mit ihren Lieder und ihrer herrlichen Stimme das Lebensgefühl Kubas besingt .
Die vier Musiker spielen Kubas Rhythmus dazu und sind zugleich Gäste der Bar .
Tourismus : Abstieg zu den Römern
Auf rund 120 Metern Länge ist unterhalb von Köln ein Abwasserkanal aus der Römerzeit erhalten .
Wer Köln besucht , kommt am Dom nicht vorbei .
Rund 157 Meter ragen die beiden Türme in den Himmel und machen ihn zum zweithöchsten Kirchengebäude Europas .
Doch nur wenige Besucher , die die beiden filigranen Kirchtürme bestaunen , ahnen , dass es auch unter dem Dom eine Menge zu entdecken gibt .
Rainer Schulze ist Experte in Sachen Kölner Unterwelt .
Treffpunkt für seine Führungen ist das Service @-@ Center von Köln @-@ Tourismus direkt am Dom .
Der Rundgang beginnt ganz unspektakulär : &quot; Wir fangen in der Tiefgarage an &quot; , sagt Schulze .
In den siebziger Jahren wollten die Stadtväter eine autogerechte Stadt , und deshalb blieb von den Resten der alten Stadtmauer nur das stehen , was nicht zu groß war .
Die meisten Benutzer des Parkhauses eilen deshalb heute auch an den römischen Überresten vorbei und stellen nur ihr Auto ab .
Doch wer genauer hinschaut , entdeckt im Parkdeck D2 eine durch Metallgitterstäbe abgetrennte archäologische Fundstelle .
Zu sehen sind etwa fünf Meter hohe Ruinen aus handtellergroßen Steinen .
&quot; Es sind Reste der römischen Stadtmauer , die in der zweiten Hälfte des ersten Jahrhunderts nach Christus erbaut wurde &quot; , erzählt Schulze .
Bevor es wieder zurück ans Tageslicht geht , lässt Schulze die Teilnehmer auf der oberen Parkebene noch einen Blick in einen finsteren , 15 Meter tiefen Schacht werfen .
Das ist der Brunnen des alten Domes , der leider auch kaum wahrgenommen wird .
Nächste Station des Rundgangs ist das Prätorium , und hier steigen die Teilnehmer wieder hinunter in die Tiefe .
Wir erleben hier den Amtssitz des einst mächtigsten Mannes nördlich der Alpen , des Prätors der CCAA .
Was CCAA bedeutet , möchte eine Besucherin wissen .
&quot; Die Abkürzung steht für &quot; Colonia Claudia Ara Agrippinensium &quot; , was auf gut Deutsch so viel wie &quot; Stadt römischen Rechts und Stadt der Agrippinenser , gegründet unter Kaiser Claudius am Ort des Altars für den Kaiserkult &quot; bedeutet &quot; .
Und beim Prätorium handelt es sich um den ehemaligen Statthalterpalast , das Machtzentrum des römischen Imperiums am Rhein .
Vom Vorraum der Ausstellung führt ein Tunnelzugang zum römischen Abwasserkanal , der hier auf rund 120 Metern Länge erhalten ist .
&quot; Sie können ruhig ein Stück entlang der sogenannten Cloaca Maxima entlanggehen , wenn Sie wollen &quot; , muntert Schulze die Gäste auf .
Eine Überraschung hat Schulze noch .
Nachdem er an der Kasse den Schlüssel geholt hat , führt er die Gruppe zu einem 16 Meter tiefen , begehbaren Schacht .
&quot; Wir sind jetzt in der Mikwe , einem rituellen jüdischen Bad &quot; , erklärt er .
Die jüdische Gemeinde baute ihr Bad tief in den Boden , um an das Grundwasser zu kommen , das für die rituellen Waschungen unabdingbar war .
Bis heute sind im unteren Ende der Mikwe , deren Ursprünge bis ins achte Jahrhundert zurückgehen , unterschiedliche Wasserstände durch wechselnde Pegel des Rheins ablesbar .
Die Mikwe wird Teil einer archäologischen Zone auf dem Rathausplatz , für das die Bauarbeiten in Kürze beginnen sollen .
Bis zur Fertigstellung werden aber noch einige Jahre vergehen .
Bein fast abgehackt : Neuauflage von Rocker @-@ Prozess
Eine blutige Attacke im Rockermilieu wird nach über vier Jahre neu aufgerollt .
Ein Prozess wegen versuchten Totschlags , gefährlicher Körperverletzung und Sachbeschädigung gegen zwei 30 @-@ Jährige hat vor dem Landgericht Frankfurt ( Oder ) begonnen .
Er wird von strengen Sicherheitsvorkehrungen begleitet .
Die Angeklagten schwiegen zum Auftakt .
Sie sollen in der Rockerszene aktiv gewesen sein und damals zu den Bandidos gehört haben .
Die Staatsanwaltschaft wirft ihnen vor , im Juni 2009 gemeinsam mit unbekannten Komplizen in Finowfurt auf drei Männer in einem Auto eingestochen und eingeschlagen zu haben .
Alle Opfer wurden schwer verletzt , ein Mann hätte fast sein Bein verloren .
Die Opfer sollen zur konkurrierenden Gruppierung Hells Angels gehört haben .
Einer soll ein hochrangiges Mitglied aus Berlin gewesen sein .
Vorausgegangen war anscheinend eine Verfolgungsjagd mit mehreren Autos .
Laut Anklage ging es um Revierkämpfe und eine Machtdemonstration .
Die beiden Angeklagten waren Anfang 2012 in einem ersten Verfahren freigesprochen worden .
Ein Gerichtssprecher sagte damals , es habe nicht bewiesen werden können , dass die Männer an der blutigen Fehde tatsächlich beteiligt gewesen seien .
Die Täter hatten Masken getragen und waren nicht erkannt worden .
Der Bundesgerichtshof hob das Urteil nach Revision der Staatsanwaltschaft auf und verwies es zur erneuten Verhandlung an das Landgericht zurück .
Einer der Angeklagten ist derzeit wegen eines anderen Deliktes im offenen Vollzug .
Zum Auftakt ging es vor allem um die Rekonstruktion der Abläufe in der Tatnacht .
Als Zeuge war der damals ermittelnde Kommissar geladen .
Im Zentrum standen Handygespräche der Angeklagten und weiterer Personen , die die Polizei abgehört hatte .
Schwierig ist , dass sich Rocker vor Gericht fast immer an ein für sie ehernes Gesetz halten - und nicht aussagen .
Das gilt auch für die Opfer .
Im ersten Prozess hatte nur eines der Opfer ausgepackt .
Staatsanwalt Stefan Golfier von der Staatsanwaltschaft Frankfurt ( Oder ) sagte auf Nachfrage , es seien seit dem letzten Verfahren neue Spuren aufgetaucht .
Für den Prozess sind elf weitere Verhandlungstage angesetzt .
Die Wegwerfgesellschaft denkt nicht
Die Nacht war lang , die Musik laut und die Stimmung gut , aber irgendwann geht es nach Hause .
Nur : In den Bäuchen der Leute auf dem Beifahrer- und Rücksitz macht sich der Hunger bemerkbar .
Klar , dafür mag der eine oder andere Cocktail oder Sekt verantwortlich sein !
Was liegt da näher , als gechillt zum nächsten Drive @-@ In zu fahren , um sich eine Kleinigkeit zu gönnen ?
Ich gebe zu , ich bin gerne mit dabei , wenn es spätnachts beziehungsweise frühmorgens ans Fastfood @-@ Holen geht .
Ein paar Pommes , eine Cola , ein Burger - und dann nix wie ab nach Hause und ins Bett !
Doch auf dem Heimweg machen sich die offensichtlichen Unterschiede zwischen mir und anderen hungrigen Disco @-@ Gängern bemerkbar .
Denn was muss einem fehlen , dass man mit steter Regelmäßigkeit seine Fastfood @-@ Tüten aus dem Autofenster wirft ? !
Vor allem an den Wochenenden liegen weggeworfene Papiertüten an Straßenrändern und auf Parkplätzen .
&quot; Wieso ? &quot; , frage ich mich .
Sind die Leute zu doof , um die Tüten mit nach Hause respektive bis zum nächsten Mülleimer zu nehmen ?
Es ist ja nicht nur so , dass das Papierzeugs die Landschaft verschandelt .
Tüten haben auch schon Verkehrseinrichtungen wie Leitplanken verdeckt und dadurch Unfälle ausgelöst .
Über so was denkt besagte &quot; Wegwerfgesellschaft &quot; aber nicht nach , vermutlich weiß sie nicht einmal , was dieses Wort eigentlich bedeutet .
Wenn man abends öfter unterwegs ist , erst recht mit mehreren Leuten im Auto , weiß man , wie eine Rückbank nach durchfeierten Nächten aussehen kann : Klamotten , Flaschen und sonstiger Müll türmen sich da .
Da würden ein paar Tüten mehr oder weniger doch auch nix ausmachen - im Gegensatz zur Straße , wo keiner auf den Essensresten anderer rumtrampeln will .
Ich sehe ja schon den Tag kommen , an dem den Städten und Gemeinden das Wegräumen zu blöd wird - und die Fastfood @-@ Ketten für ihre Tüten Pfand verlangen müssen .
Obamas Rückzieher in der Gesundheitspolitik
Nach heftiger Kritik machte Präsident Obama gestern einen Rückzieher bei seinem häufig wiederholten , eindeutigen Versprechen : „ Wenn Ihnen Ihre Krankenversicherung gefällt , dann können Sie sie behalten . “
Nachdem Hunderttausende von ihrem Versicherer ein Kündigungsschreiben erhalten haben , warfen die Republikaner dem Präsidenten in den letzten Tagen vor , er habe die amerikanische Öffentlichkeit getäuscht .
Gestern relativierte Obama sein ursprüngliches Versprechen .
„ Die überwiegende Mehrheit der Bürger , die eine funktionierende Krankenversicherung haben , können sie behalten “ , sagte er bei einer Rede in Boston .
Als Reaktion auf die zahlreichen Medienberichte zu den Kündigungen forderte Obama jene Amerikaner , die derartige Mitteilungen erhalten haben , auf , sich auf dem freien Markt nach einer neuen Versicherung umzusehen .
Die meisten Bürger könnten so eine bessere , umfassendere Krankenversicherung für denselben Preis oder günstiger als prognostiziert erhalten .
„ Sie kommen ein besseres Angebot “ , sagte er .
Die Regierung bezeichnete es als wenig überraschend , dass sich die fünf Prozent der Bevölkerung , die selbst eine Versicherung abgeschlossen haben , nach einem anderen Tarif umsehen müssten , da ihr Vertrag nicht den neuen Standards nach dem Affordable Care Act entspreche .
„ Ich möchte diesen Amerikanern ganz direkt sagen : Sie haben Besseres verdient “ , sagte Sebelius bei einer Anhörung vor dem Energie- und Handelsausschuss des Repräsentantenhauses in Washington .
Sebelius , die für die Umsetzung des Affordable Care Acts verantwortlich ist , erklärte , dass der Start der Online @-@ Plattform seit Oktober „ miserabel “ verlaufen sei .
„ Ich bin ebenso frustriert und wütend wie alle anderen auch “ , sagte sie .
Ich bin entschlossen , Ihr Vertrauen zurückzugewinnen .
Dieser Ausspruch einer aufgebrachten Sebelius zu einem hinter ihr sitzenden Berater bei der gestrigen Anhörung im Repräsentantenhaus wurde nach einem Streitgespräch mit dem republikanischen Abgeordneten Billy Long aus Missouri aufgenommen . Dabei ging es darum , ob sie zur Teilnahme an Obamacare verpflichtet sein sollte .
Nach mehr als drei Stunden Anhörung bedrängte Long Sebelius wiederholt mit der Frage , warum die „ Architektin “ des Affordable Care Acts nicht freiwillig auf eine staatlich geförderte Versicherung verzichtet habe , um selber einen Tarif bei HealthCare.gov abzuschließen , den sie nun Millionen von Amerikanern verkaufen wolle .
Regierung in Jerusalem bestätigt Angriff auf syrischen Luftwaffenstützpunkt nicht
Ein amerikanischer Regierungsbeamter , der anonym bleiben wollte , hat am Donnerstag gegenüber dem amerikanischen Nachrichtensender CNN behauptet , israelische Kampfflugzeuge hätten einen Tag zuvor einen Luftwaffenstützpunkt im syrischen Latakia angegriffen .
Das Ziel seien &quot; Raketen und zugehörige Ausrüstung &quot; gewesen , von denen die israelische Regierung befürchtet habe , sie seien für die libanesische Hisbollah bestimmt gewesen , hieß es laut CNN .
Syrische und libanesische Medien sowie der arabische Sender Al @-@ Arabiya hatten zuvor berichtet , dass der Stützpunkt in der Hafenstadt Latakia in der Nacht von Mittwoch auf Donnerstag beschossen worden sei , und die Israelis dafür verantwortlich gemacht .
Der israelische Fernsehsender Channel 2 zeigte Satellitenbilder des Stützpunktes in Latakia , auf denen russische Abwehrraketen vom Typ S @-@ 125 Newa sowie eine Batterie von SA @-@ 3 Raketen zu sehen waren , die Channel 2 zufolge eine Reichweite von 35 Kilometern haben und Sprengköpfe bis zu 70 Kilogramm transportieren können .
Unsicher Die Regierung in Jerusalem hat den Angriff offiziell nicht bestätigt .
Allerdings zitiert die Nachrichtenagentur Reuters einen ebenfalls anonymen israelischen Regierungsbeamten mit den Worten , er glaube , dass Israel den Angriff ausgeführt habe , sei aber nicht sicher .
Ein Sprecher des israelischen Verteidigungsministeriums sagte jedenfalls : &quot; Wir kommentieren diese Berichte nicht &quot; .
Der Journalist Ron Ben @-@ Yishai betonte in der Tageszeitung Yedioth Ahronoth , dass das syrische Regime bereits früher , teils erfolgreich , versucht habe , Boden @-@ Luft @-@ Raketen an die Hisbollah zu liefern .
Die israelische Regierung hatte wiederholt davor gewarnt , dass jeder Versuch Syriens , die Hisbollah mit chemischen oder anderen gefährlichen Waffen zu versorgen , das Überschreiten einer &quot; roten Linie &quot; bedeute , dem eine militärische Antwort folgen würde .
John Kerry erklärt in einem beispiellosen Eingeständnis , die US @-@ Spionage sei „ unangemessen zu weit gegangen “
John Kerry deutete mit einem unerwarteten Eingeständnis ein Aufweichen der abwehrenden Haltung der USA in Bezug auf ihre Überwachungsprogramme an , indem er sagte , die Spionage sei in bestimmten Fällen „ unangemessen zu weit gegangen “ .
Der Außenminister gab außerdem zu , er trüge gemeinsam mit Barack Obama die Verantwortung dafür , dass man auf „ Autopilot “ geschaltet habe , als die explosiven Enthüllungen des Whistleblowers Edward Snowden über die Spionageaktivitäten der NSA öffentlich wurden .
Durch die durchgesickerten Informationen ist die US @-@ Regierung in einen diplomatischen Sturm der Entrüstung vonseiten ihrer Verbündeten geraten .
Bei einer per Videoverbindung übertragenen Rede auf der Open Government @-@ Konferenz in London sagte Kerry : „ Ganz ohne Frage haben der Präsident und ich sowie andere in der Regierung von einigen Dingen erfahren , die quasi per Autopilot abgelaufen sind , einfach weil die Fähigkeit dazu bestand , was noch auf den Zweiten Weltkrieg und die schwierigen Jahre des Kalten Krieges sowie natürlich auf den 11. September zurückgeht . “
Anschließend gestand er als erstes hochrangiges Mitglied der US @-@ amerikanischen Regierung ein , dass die US @-@ Spionage eine Grenze überschritten habe , betonte aber auch , dass keine Rechte missbraucht worden seien .
Er sagte : „ In einigen Fällen ist das unangemessen zu weit gegangen . “
Der Präsident ist entschlossen , Klarheit zu schaffen , und führt deshalb eine gründliche Untersuchung durch , damit niemand das Gefühl haben muss , hier finde Missbrauch statt .
Ich versichere Ihnen , dass die Rechte unschuldiger Personen in diesem Prozess nicht beeinträchtigt werden .
Kerry bestand allerdings darauf , dass die NSA eine Kraft des Guten sei und durch ihre Überwachungsvorgänge viele Leben gerettet worden seien .
Er fügte hinzu : „ Wir haben es mit einer neuen Welt zu tun , in der Menschen bereit sind , sich selbst in die Luft zu sprengen . “
Es gibt einen radikalen Extremismus in der Welt , der versessen darauf ist , Menschen zu töten , in die Luft zu sprengen und Regierungen anzugreifen .
Was wäre also , wenn man in der Lage wäre , das abzufangen und zu stoppen , ehe es passiert ?
Wir haben tatsächlich Flugzeugabstürze , Anschläge auf Gebäude und die Ermordung von Menschen verhindert , weil wir im Vorfeld von solchen Plänen erfahren haben .
Unterdessen werden US @-@ amerikanische Gesetzgeber nach Europa reisen , um die Bedenken gegen die angebliche amerikanische Spionage zu zerstreuen und die Europäer von der Notwendigkeit zu überzeugen , bei den Anti @-@ Terror @-@ Bemühungen weiterhin mit den USA zusammenzuarbeiten , wie der Vorsitzende des Senatsunterausschusses für europäische Angelegenheiten am Donnerstag erklärte .
[truncated: 5,956 more chars]
