# Supplementary material
Source: ML conference proceedings conference paper supplement (https://proceedings.neurips.cc/paper_files/paper/2022/hash/35f805e65c77652efa731edc10c8e3a6-Abstract.html)
Supplement: Supplementary file 1 [file 35f805e65c77652efa731edc10c8e3a6-Supplemental-Conference.zip › Supplementary Material/code/tests/test_binaries.py]

# Copyright (c) Facebook, Inc. and its affiliates.
#
# This source code is licensed under the MIT license found in the
# LICENSE file in the root directory of this source tree.

import contextlib
from io import StringIO
import logging
import os
import random
import sys
import tempfile
import unittest

import torch

from fairseq import options
from fairseq_cli import preprocess
from fairseq_cli import train
from fairseq_cli import generate
from fairseq_cli import interactive
from fairseq_cli import eval_lm
from fairseq_cli import validate


class TestTranslation(unittest.TestCase):

    def setUp(self):
        logging.disable(logging.CRITICAL)

    def tearDown(self):
        logging.disable(logging.NOTSET)

    def test_fconv(self):
        with contextlib.redirect_stdout(StringIO()):
            with tempfile.TemporaryDirectory('test_fconv') as data_dir:
                create_dummy_data(data_dir)
                preprocess_translation_data(data_dir)
                train_translation_model(data_dir, 'fconv_iwslt_de_en')
                generate_main(data_dir)

    def test_raw(self):
        with contextlib.redirect_stdout(StringIO()):
            with tempfile.TemporaryDirectory('test_fconv_raw') as data_dir:
                create_dummy_data(data_dir)
                preprocess_translation_data(data_dir, ['--dataset-impl', 'raw'])
                train_translation_model(data_dir, 'fconv_iwslt_de_en', ['--dataset-impl', 'raw'])
                generate_main(data_dir, ['--dataset-impl', 'raw'])

    @unittest.skipIf(not torch.cuda.is_available(), 'test requires a GPU')
    def test_fp16(self):
        with contextlib.redirect_stdout(StringIO()):
            with tempfile.TemporaryDirectory('test_fp16') as data_dir:
                create_dummy_data(data_dir)
                preprocess_translation_data(data_dir)
                train_translation_model(data_dir, 'fconv_iwslt_de_en', ['--fp16'])
                generate_main(data_dir)

    @unittest.skipIf(not torch.cuda.is_available(), 'test requires a GPU')
    def test_memory_efficient_fp16(self):
        with contextlib.redirect_stdout(StringIO()):
            with tempfile.TemporaryDirectory('test_memory_efficient_fp16') as data_dir:
                create_dummy_data(data_dir)
                preprocess_translation_data(data_dir)
                train_translation_model(data_dir, 'fconv_iwslt_de_en', ['--memory-efficient-fp16'])
                generate_main(data_dir)

    def test_update_freq(self):
        with contextlib.redirect_stdout(StringIO()):
            with tempfile.TemporaryDirectory('test_update_freq') as data_dir:
                create_dummy_data(data_dir)
                preprocess_translation_data(data_dir)
                train_translation_model(data_dir, 'fconv_iwslt_de_en', ['--update-freq', '3'])
                generate_main(data_dir)

    def test_max_positions(self):
        with contextlib.redirect_stdout(StringIO()):
            with tempfile.TemporaryDirectory('test_max_positions') as data_dir:
                create_dummy_data(data_dir)
                preprocess_translation_data(data_dir)
                with self.assertRaises(Exception) as context:
                    train_translation_model(
                        data_dir, 'fconv_iwslt_de_en', ['--max-target-positions', '5'],
                    )
                self.assertTrue(
                    'skip this example with --skip-invalid-size-inputs-valid-test' in str(context.exception)
                )
                train_translation_model(
                    data_dir, 'fconv_iwslt_de_en',
                    ['--max-target-positions', '5', '--skip-invalid-size-inputs-valid-test'],
                )
                with self.assertRaises(Exception) as context:
                    generate_main(data_dir)
                generate_main(data_dir, ['--skip-invalid-size-inputs-valid-test'])

    def test_generation(self):
        with contextlib.redirect_stdout(StringIO()):
            with tempfile.TemporaryDirectory('test_sampling') as data_dir:
                create_dummy_data(data_dir)
                preprocess_translation_data(data_dir)
                train_translation_model(data_dir, 'fconv_iwslt_de_en')
                generate_main(data_dir, [
                    '--sampling',
                    '--temperature', '2',
                    '--beam', '2',
                    '--nbest', '2',
                ])
                generate_main(data_dir, [
                    '--sampling',
                    '--sampling-topk', '3',
                    '--beam', '2',
                    '--nbest', '2',
                ])
                generate_main(data_dir, [
                    '--sampling',
                    '--sampling-topp', '0.2',
                    '--beam', '2',
                    '--nbest', '2',
                ])
                generate_main(data_dir, [
                    '--diversity-rate', '0.5',
                    '--beam', '6',
                ])
                with self.assertRaises(ValueError):
                    generate_main(data_dir, [
                        '--diverse-beam-groups', '4',
                        '--match-source-len',
                    ])
                generate_main(data_dir, ['--prefix-size', '2'])

    def test_eval_bleu(self):
        with contextlib.redirect_stdout(StringIO()):
            with tempfile.TemporaryDirectory('test_eval_bleu') as data_dir:
                create_dummy_data(data_dir)
                preprocess_translation_data(data_dir)
                train_translation_model(data_dir, 'fconv_iwslt_de_en', [
                    '--eval-bleu',
                    '--eval-bleu-print-samples',
                    '--eval-bleu-remove-bpe',
                    '--eval-bleu-detok', 'space',
                    '--eval-bleu-args', '{"beam": 4, "min_len": 10}',
                ])

    def test_lstm(self):
        with contextlib.redirect_stdout(StringIO()):
            with tempfile.TemporaryDirectory('test_lstm') as data_dir:
                create_dummy_data(data_dir)
                preprocess_translation_data(data_dir)
                train_translation_model(data_dir, 'lstm_wiseman_iwslt_de_en', [
                    '--encoder-layers', '2',
                    '--decoder-layers', '2',
                    '--encoder-embed-dim', '8',
                    '--decoder-embed-dim', '8',
                    '--decoder-out-embed-dim', '8',
                ])
                generate_main(data_dir)

    def test_lstm_bidirectional(self):
        with contextlib.redirect_stdout(StringIO()):
            with tempfile.TemporaryDirectory('test_lstm_bidirectional') as data_dir:
                create_dummy_data(data_dir)
                preprocess_translation_data(data_dir)
                train_translation_model(data_dir, 'lstm', [
                    '--encoder-layers', '2',
                    '--encoder-bidirectional',
                    '--encoder-hidden-size', '16',
                    '--encoder-embed-dim', '8',
                    '--decoder-embed-dim', '8',
                    '--decoder-out-embed-dim', '8',
                    '--decoder-layers', '2',
                ])
                generate_main(data_dir)

    def test_transformer(self):
        with contextlib.redirect_stdout(StringIO()):
            with tempfile.TemporaryDirectory('test_transformer') as data_dir:
                create_dummy_data(data_dir)
                preprocess_translation_data(data_dir)
                train_translation_model(data_dir, 'transformer_iwslt_de_en', [
                    '--encoder-layers', '2',
                    '--decoder-layers', '2',
                    '--encoder-embed-dim', '8',
                    '--decoder-embed-dim', '8',
                ], run_validation=True)
                generate_main(data_dir)

    def test_multilingual_transformer(self):
        # test with all combinations of encoder/decoder lang tokens
        encoder_langtok_flags = [[], ['--encoder-langtok', 'src'], ['--encoder-langtok', 'tgt']]
        decoder_langtok_flags = [[], ['--decoder-langtok']]
        with contextlib.redirect_stdout(StringIO()):
            for i in range(len(encoder_langtok_flags)):
                for j in range(len(decoder_langtok_flags)):
                    enc_ltok_flag = encoder_langtok_flags[i]
                    dec_ltok_flag = decoder_langtok_flags[j]
                    with tempfile.TemporaryDirectory(f'test_multilingual_transformer_{i}_{j}') as data_dir:
                        create_dummy_data(data_dir)
                        preprocess_translation_data(data_dir)
                        train_translation_model(
                            data_dir,
                            arch='multilingual_transformer',
                            task='multilingual_translation',
                            extra_flags=[
                                '--encoder-layers', '2',
                                '--decoder-layers', '2',
                                '--encoder-embed-dim', '8',
                                '--decoder-embed-dim', '8',
                            ] + enc_ltok_flag + dec_ltok_flag,
                            lang_flags=['--lang-pairs', 'in-out,out-in'],
                            run_validation=True,
                            extra_valid_flags=enc_ltok_flag + dec_ltok_flag,
                        )
                        generate_main(
                            data_dir,
                            extra_flags=[
                                '--task', 'multilingual_translation',
                                '--lang-pairs', 'in-out,out-in',
                                '--source-lang', 'in',
                                '--target-lang', 'out',
                            ] + enc_ltok_flag + dec_ltok_flag,
                        )

    def test_transformer_cross_self_attention(self):
        with contextlib.redirect_stdout(StringIO()):
            with tempfile.TemporaryDirectory('test_transformer_cross_self_attention') as data_dir:
                create_dummy_data(data_dir)
                preprocess_translation_data(data_dir)
                train_translation_model(data_dir, 'transformer_iwslt_de_en', [
                    '--encoder-layers', '2',
                    '--decoder-layers', '2',
                    '--encoder-embed-dim', '8',
                    '--decoder-embed-dim', '8',
                    '--decoder-embed-dim', '8',
                    '--no-cross-attention',
                    '--cross-self-attention',
                    '--layer-wise-attention',
                ], run_validation=True)
                generate_main(data_dir, extra_flags=[])

    def test_lightconv(self):
        with contextlib.redirect_stdout(StringIO()):
            with tempfile.TemporaryDirectory('test_lightconv') as data_dir:
                create_dummy_data(data_dir)
                preprocess_translation_data(data_dir)
                train_translation_model(data_dir, 'lightconv_iwslt_de_en', [
                    '--encoder-conv-type', 'lightweight',
                    '--decoder-conv-type', 'lightweight',
                    '--encoder-embed-dim', '8',
                    '--decoder-embed-dim', '8',
                ])
                generate_main(data_dir)

    def test_dynamicconv(self):
        with contextlib.redirect_stdout(StringIO()):
            with tempfile.TemporaryDirectory('test_dynamicconv') as data_dir:
                create_dummy_data(data_dir)
                preprocess_translation_data(data_dir)
                train_translation_model(data_dir, 'lightconv_iwslt_de_en', [
                    '--encoder-conv-type', 'dynamic',
                    '--decoder-conv-type', 'dynamic',
                    '--encoder-embed-dim', '8',
                    '--decoder-embed-dim', '8',
                ])
                generate_main(data_dir)

    def test_cmlm_transformer(self):
        with contextlib.redirect_stdout(StringIO()):
            with tempfile.TemporaryDirectory('test_cmlm_transformer') as data_dir:
                create_dummy_data(data_dir)
                preprocess_translation_data(data_dir, ['--joined-dictionary'])
                train_translation_model(data_dir, 'cmlm_transformer', [
                    '--apply-bert-init',
                    '--criterion', 'nat_loss',
                    '--noise', 'full_mask',
                    '--pred-length-offset',
                    '--length-loss-factor', '0.1'
                ], task='translation_lev')
                generate_main(data_dir, [
                    '--task', 'translation_lev',
                    '--iter-decode-max-iter', '9',
                    '--iter-decode-eos-penalty', '0',
                    '--print-step',
                ])

    def test_levenshtein_transformer(self):
        with contextlib.redirect_stdout(StringIO()):
            with tempfile.TemporaryDirectory('test_levenshtein_transformer') as data_dir:
                create_dummy_data(data_dir)
                preprocess_translation_data(data_dir, ['--joined-dictionary'])
                train_translation_model(data_dir, 'levenshtein_transformer', [
                    '--apply-bert-init', '--early-exit', '6,6,6',
                    '--criterion', 'nat_loss'
                ], task='translation_lev')
                generate_main(data_dir, [
                    '--task', 'translation_lev',
                    '--iter-decode-max-iter', '9',
                    '--iter-decode-eos-penalty', '0',
                    '--print-step',
                ])

    def test_nonautoregressive_transformer(self):
        with contextlib.redirect_stdout(StringIO()):
            with tempfile.TemporaryDirectory('test_nonautoregressive_transformer') as data_dir:
                create_dummy_data(data_dir)
                preprocess_translation_data(data_dir, ['--joined-dictionary'])
                train_translation_model(data_dir, 'nonautoregressive_transformer', [
                    '--apply-bert-init', '--src-embedding-copy', '--criterion',
                    'nat_loss', '--noise', 'full_mask', '--pred-length-offset',
                    '--length-loss-factor', '0.1'
                ], task='translation_lev')
                generate_main(data_dir, [
                    '--task', 'translation_lev',
                    '--iter-decode-max-iter', '0',
                    '--iter-decode-eos-penalty', '0',
                    '--print-step',
                ])

    # def test_nat_crf_transformer(self):
    #     with contextlib.redirect_stdout(StringIO()):
    #         with tempfile.TemporaryDirectory('test_nat_crf_transformer') as data_dir:
    #             create_dummy_data(data_dir)
    #             preprocess_translation_data(data_dir, ['--joined-dictionary'])
    #             train_translation_model(data_dir, 'nacrf_transformer', [
    #                 '--apply-bert-init', '--criterion',
    #                 'nat_loss', '--noise', 'full_mask', '--pred-length-offset',
    #                 '--length-loss-factor', '0.1',
    #                 '--word-ins-loss-factor', '0.5',
    #                 '--crf-lowrank-approx', '1',
    #                 '--crf-beam-approx', '1'
    #             ], task='translation_lev')
    #             generate_main(data_dir, [
    #                 '--task', 'translation_lev',
    #                 '--iter-decode-max-iter', '0',
    #                 '--iter-decode-eos-penalty', '0',
    #                 '--print-step',
    #             ])

    def test_iterative_nonautoregressive_transformer(self):
        with contextlib.redirect_stdout(StringIO()):
            with tempfile.TemporaryDirectory('test_iterative_nonautoregressive_transformer') as data_dir:
                create_dummy_data(data_dir)
                preprocess_translation_data(data_dir, ['--joined-dictionary'])
                train_translation_model(data_dir, 'iterative_nonautoregressive_transformer', [
                    '--apply-bert-init', '--src-embedding-copy', '--criterion',
                    'nat_loss', '--noise', 'full_mask', '--stochastic-approx',
                    '--dae-ratio', '0.5', '--train-step', '3'
                ], task='translation_lev')
                generate_main(data_dir, [
                    '--task', 'translation_lev',
                    '--iter-decode-max-iter', '9',
                    '--iter-decode-eos-penalty', '0',
                    '--print-step',
                ])

    def test_insertion_transformer(self):
        with contextlib.redirect_stdout(StringIO()):
            with tempfile.TemporaryDirectory('test_insertion_transformer') as data_dir:
                create_dummy_data(data_dir)
                preprocess_translation_data(data_dir, ['--joined-dictionary'])
                train_translation_model(data_dir, 'insertion_transformer', [
                    '--apply-bert-init', '--criterion', 'nat_loss', '--noise',
                    'random_mask'
                ], task='translation_lev')
                generate_main(data_dir, [
                    '--task', 'translation_lev',
                    '--iter-decode-max-iter', '9',
                    '--iter-decode-eos-penalty', '0',
                    '--print-step',
                ])

    def test_mixture_of_experts(self):
        with contextlib.redirect_stdout(StringIO()):
            with tempfile.TemporaryDirectory('test_moe') as data_dir:
                create_dummy_data(data_dir)
                preprocess_translation_data(data_dir)
                train_translation_model(data_dir, 'transformer_iwslt_de_en', [
                    '--task', 'translation_moe',
                    '--method', 'hMoElp',
                    '--mean-pool-gating-network',
                    '--num-experts', '3',
                    '--encoder-layers', '2',
                    '--decoder-layers', '2',
                    '--encoder-embed-dim', '8',
                    '--decoder-embed-dim', '8',
                ])
                generate_main(data_dir, [
                    '--task', 'translation_moe',
                    '--method', 'hMoElp',
                    '--mean-pool-gating-network',
                    '--num-experts', '3',
                    '--gen-expert', '0'
                ])

    def test_alignment(self):
        with contextlib.redirect_stdout(StringIO()):
            with tempfile.TemporaryDirectory('test_alignment') as data_dir:
                create_dummy_data(data_dir, alignment=True)
                preprocess_translation_data(data_dir, ['--align-suffix', 'align'])
                train_translation_model(
                    data_dir,
                    'transformer_align',
                    [
                        '--encoder-layers', '2',
                        '--decoder-layers', '2',
                        '--encoder-embed-dim', '8',
                        '--decoder-embed-dim', '8',
                        '--load-alignments',
                        '--alignment-layer', '1',
                        '--criterion', 'label_smoothed_cross_entropy_with_alignment'
                    ],
                    run_validation=True,
                )
                generate_main(data_dir)


class TestStories(unittest.TestCase):

    def setUp(self):
        logging.disable(logging.CRITICAL)

    def tearDown(self):
        logging.disable(logging.NOTSET)

    def test_fconv_self_att_wp(self):
        with contextlib.redirect_stdout(StringIO()):
            with tempfile.TemporaryDirectory('test_fconv_self_att_wp') as data_dir:
                create_dummy_data(data_dir)
                preprocess_translation_data(data_dir)
                config = [
                    '--encoder-layers', '[(128, 3)] * 2',
                    '--decoder-layers', '[(128, 3)] * 2',
                    '--decoder-attention', 'True',
                    '--encoder-attention', 'False',
                    '--gated-attention', 'True',
                    '--self-attention', 'True',
                    '--project-input', 'True',
                    '--encoder-embed-dim', '8',
                    '--decoder-embed-dim', '8',
                    '--decoder-out-embed-dim', '8',
                    '--multihead-self-attention-nheads', '2'
                ]
                train_translation_model(data_dir, 'fconv_self_att_wp', config)
                generate_main(data_dir)

                # fusion model
                os.rename(os.path.join(data_dir, 'checkpoint_last.pt'), os.path.join(data_dir, 'pretrained.pt'))
                config.extend([
                    '--pretrained', 'True',
                    '--pretrained-checkpoint', os.path.join(data_dir, 'pretrained.pt'),
                    '--save-dir', os.path.join(data_dir, 'fusion_model'),
                ])
                train_translation_model(data_dir, 'fconv_self_att_wp', config)


class TestLanguageModeling(unittest.TestCase):

    def setUp(self):
        logging.disable(logging.CRITICAL)

    def tearDown(self):
        logging.disable(logging.NOTSET)

    def test_fconv_lm(self):
        with contextlib.redirect_stdout(StringIO()):
            with tempfile.TemporaryDirectory('test_fconv_lm') as data_dir:
                create_dummy_data(data_dir)
                preprocess_lm_data(data_dir)
                train_language_model(data_dir, 'fconv_lm', [
                    '--decoder-layers', '[(850, 3)] * 2 + [(1024,4)]',
                    '--decoder-embed-dim', '280',
                    '--optimizer', 'nag',
                    '--lr', '0.1',
                ])
                eval_lm_main(data_dir)

    def test_transformer_lm(self):
        with contextlib.redirect_stdout(StringIO()):
            with tempfile.TemporaryDirectory('test_transformer_lm') as data_dir:
                create_dummy_data(data_dir)
                preprocess_lm_data(data_dir)
                train_language_model(
                    data_dir, 'transformer_lm', ['--add-bos-token'], run_validation=True,
                )
                eval_lm_main(data_dir)
                generate_main(data_dir, [
                    '--task', 'language_modeling',
                    '--sample-break-mode', 'eos',
                    '--tokens-per-sample', '500',
                ])

    def test_lightconv_lm(self):
        with contextlib.redirect_stdout(StringIO()):
            with tempfile.TemporaryDirectory('test_lightconv_lm') as data_dir:
                create_dummy_data(data_dir)
                preprocess_lm_data(data_dir)
                train_language_model(
                    data_dir, 'lightconv_lm', ['--add-bos-token'], run_validation=True,
                )
                eval_lm_main(data_dir)
                generate_main(data_dir, [
                    '--task', 'language_modeling',
                    '--sample-break-mode', 'eos',
                    '--tokens-per-sample', '500',
                ])

    def test_lstm_lm(self):
        with contextlib.redirect_stdout(StringIO()):
            with tempfile.TemporaryDirectory('test_lstm_lm') as data_dir:
                create_dummy_data(data_dir)
                preprocess_lm_data(data_dir)
                train_language_model(
                    data_dir, 'lstm_lm', ['--add-bos-token'], run_validation=True,
                )
                eval_lm_main(data_dir)
                generate_main(data_dir, [
                    '--task', 'language_modeling',
                    '--sample-break-mode', 'eos',
                    '--tokens-per-sample', '500',
                ])


class TestMaskedLanguageModel(unittest.TestCase):

    def setUp(self):
        logging.disable(logging.CRITICAL)

    def tearDown(self):
        logging.disable(logging.NOTSET)

    def test_legacy_masked_lm(self):
        with contextlib.redirect_stdout(StringIO()):
            with tempfile.TemporaryDirectory("test_legacy_mlm") as data_dir:
                create_dummy_data(data_dir)
                preprocess_lm_data(data_dir)
                train_legacy_masked_language_model(data_dir, "masked_lm")

    def _test_pretrained_masked_lm_for_translation(self, learned_pos_emb, encoder_only):
        with contextlib.redirect_stdout(StringIO()):
            with tempfile.TemporaryDirectory("test_mlm") as data_dir:
                create_dummy_data(data_dir)
                preprocess_lm_data(data_dir)
                train_legacy_masked_language_model(
                    data_dir,
                    arch="masked_lm",
                    extra_args=('--encoder-learned-pos',) if learned_pos_emb else ()
                )
                with tempfile.TemporaryDirectory(
                    "test_mlm_translation"
                ) as translation_dir:
                    create_dummy_data(translation_dir)
                    preprocess_translation_data(
                        translation_dir, extra_flags=["--joined-dictionary"]
                    )
                    # Train transformer with data_dir/checkpoint_last.pt
                    train_translation_model(
                        translation_dir,
                        arch="transformer_from_pretrained_xlm",
                        extra_flags=[
                            "--decoder-layers",
                            "1",
                            "--decoder-embed-dim",
                            "32",
                            "--decoder-attention-heads",
                            "1",
                            "--decoder-ffn-embed-dim",
                            "32",
                            "--encoder-layers",
                            "1",
                            "--encoder-embed-dim",
                            "32",
                            "--encoder-attention-heads",
                            "1",
                            "--encoder-ffn-embed-dim",
                            "32",
                            "--pretrained-xlm-checkpoint",
                            "{}/checkpoint_last.pt".format(data_dir),
                            "--activation-fn",
                            "gelu",
                            "--max-source-positions",
                            "500",
                            "--max-target-positions",
                            "500",
                        ] + (
                            ["--encoder-learned-pos", "--decoder-learned-pos"]
                            if learned_pos_emb else []
                        ) + (['--init-encoder-only'] if encoder_only else []),
                        task="translation_from_pretrained_xlm",
                    )

    def test_pretrained_masked_lm_for_translation_learned_pos_emb(self):
        self._test_pretrained_masked_lm_for_translation(True, False)

    def test_pretrained_masked_lm_for_translation_sinusoidal_pos_emb(self):
        self._test_pretrained_masked_lm_for_translation(False, False)

    def test_pretrained_masked_lm_for_translation_encoder_only(self):
        self._test_pretrained_masked_lm_for_translation(True, True)


def train_legacy_masked_language_model(data_dir, arch, extra_args=()):
    train_parser = options.get_training_parser()
    # TODO: langs should be in and out right?
    train_args = options.parse_args_and_arch(
        train_parser,
        [
            "--task",
            "cross_lingual_lm",
            data_dir,
            "--arch",
            arch,
            # Optimizer args
            "--optimizer",
            "adam",
            "--lr-scheduler",
            "reduce_lr_on_plateau",
            "--lr-shrink",
            "0.5",
            "--lr",
            "0.0001",
            "--min-lr",
            "1e-09",
            # dropout, attention args
            "--dropout",
            "0.1",
            "--attention-dropout",
            "0.1",
            # MLM args
            "--criterion",
            "legacy_masked_lm_loss",
            "--masked-lm-only",
            "--monolingual-langs",
            "in,out",
            "--num-segment",
            "5",
            # Transformer args: use a small transformer model for fast training
            "--encoder-layers",
            "1",
            "--encoder-embed-dim",
            "32",
            "--encoder-attention-heads",
            "1",
            "--encoder-ffn-embed-dim",
            "32",
            # Other training args
            "--max-tokens",
            "500",
            "--tokens-per-sample",
            "500",
            "--save-dir",
            data_dir,
            "--max-epoch",
            "1",
            "--no-progress-bar",
            "--distributed-world-size",
            "1",
            "--dataset-impl",
            "raw",
        ] + list(extra_args),
    )
    train.main(train_args)


class TestOptimizers(unittest.TestCase):

    def setUp(self):
        logging.disable(logging.CRITICAL)

    def tearDown(self):
        logging.disable(logging.NOTSET)

    def test_optimizers(self):
        with contextlib.redirect_stdout(StringIO()):
            with tempfile.TemporaryDirectory('test_optimizers') as data_dir:
                # Use just a bit of data and tiny model to keep this test runtime reasonable
                create_dummy_data(data_dir, num_examples=10, maxlen=5)
                preprocess_translation_data(data_dir)
                optimizers = ['adafactor', 'adam', 'nag', 'adagrad', 'sgd', 'adadelta']
                last_checkpoint = os.path.join(data_dir, 'checkpoint_last.pt')
                for optimizer in optimizers:
                    if os.path.exists(last_checkpoint):
                        os.remove(last_checkpoint)
                    train_translation_model(data_dir, 'lstm', [
                        '--required-batch-size-multiple', '1',
                        '--encoder-layers', '1',
                        '--encoder-hidden-size', '32',
                        '--decoder-layers', '1',
                        '--optimizer', optimizer,
                    ])
                    generate_main(data_dir)

    @unittest.skipIf(not torch.cuda.is_available(), 'test requires a GPU')
    def test_flat_grads(self):
        with contextlib.redirect_stdout(StringIO()):
            with tempfile.TemporaryDirectory('test_flat_grads') as data_dir:
                # Use just a bit of data and tiny model to keep this test runtime reasonable
                create_dummy_data(data_dir, num_examples=10, maxlen=5)
                preprocess_translation_data(data_dir)
                with self.assertRaises(RuntimeError):
                    # adafactor isn't compatible with flat grads, which
                    # are used by default with --fp16
                    train_translation_model(data_dir, 'lstm', [
                        '--required-batch-size-multiple', '1',
                        '--encoder-layers', '1',
                        '--encoder-hidden-size', '32',
                        '--decoder-layers', '1',
                        '--optimizer', 'adafactor',
                        '--fp16',
                    ])
                # but it should pass once we set --fp16-no-flatten-grads
                train_translation_model(data_dir, 'lstm', [
                    '--required-batch-size-multiple', '1',
                    '--encoder-layers', '1',
                    '--encoder-hidden-size', '32',
                    '--decoder-layers', '1',
                    '--optimizer', 'adafactor',
                    '--fp16',
                    '--fp16-no-flatten-grads',
                ])


def create_dummy_data(data_dir, num_examples=100, maxlen=20, alignment=False):
    def _create_dummy_data(filename):
        data = torch.rand(num_examples * maxlen)
        data = 97 + torch.floor(26 * data).int()
        with open(os.path.join(data_dir, filename), 'w') as h:
            offset = 0
            for _ in range(num_examples):
                ex_len = random.randint(1, maxlen)
                ex_str = ' '.join(map(chr, data[offset:offset+ex_len]))
                print(ex_str, file=h)
                offset += ex_len

    def _create_dummy_alignment_data(filename_src, filename_tgt, filename):
        with open(os.path.join(data_dir, filename_src), 'r') as src_f, \
             open(os.path.join(data_dir, filename_tgt), 'r') as tgt_f, \
             open(os.path.join(data_dir, filename), 'w') as h:
                    for src, tgt in zip(src_f, tgt_f):
                        src_len = len(src.split())
                        tgt_len = len(tgt.split())
                        avg_len = (src_len + tgt_len) // 2
                        num_alignments = random.randint(avg_len // 2, 2 * avg_len)
                        src_indices = torch.floor(torch.rand(num_alignments) * src_len).int()
                        tgt_indices = torch.floor(torch.rand(num_alignments) * tgt_len).int()
                        ex_str = ' '.join(["{}-{}".format(src, tgt) for src, tgt in zip(src_indices, tgt_indices)])
                        print(ex_str, file=h)

    _create_dummy_data('train.in')
    _create_dummy_data('train.out')
    _create_dummy_data('valid.in')
    _create_dummy_data('valid.out')
    _create_dummy_data('test.in')
    _create_dummy_data('test.out')

    if alignment:
        _create_dummy_alignment_data('train.in', 'train.out', 'train.align')
        _create_dummy_alignment_data('valid.in', 'valid.out', 'valid.align')
        _create_dummy_alignment_data('test.in', 'test.out', 'test.align')

def preprocess_translation_data(data_dir, extra_flags=None):
    preprocess_parser = options.get_preprocessing_parser()
    preprocess_args = preprocess_parser.parse_args(
        [
            '--source-lang', 'in',
            '--target-lang', 'out',
            '--trainpref', os.path.join(data_dir, 'train'),
            '--validpref', os.path.join(data_dir, 'valid'),
            '--testpref', os.path.join(data_dir, 'test'),
            '--thresholdtgt', '0',
            '--thresholdsrc', '0',
            '--destdir', data_dir,
        ] + (extra_flags or []),
    )
    preprocess.main(preprocess_args)


def train_translation_model(data_dir, arch, extra_flags=None, task='translation', run_validation=False,
                            lang_flags=None, extra_valid_flags=None):
    if lang_flags is None:
        lang_flags = [
            '--source-lang', 'in',
            '--target-lang', 'out',
        ]
    train_parser = options.get_training_parser()
    train_args = options.parse_args_and_arch(
        train_parser,
        [
            '--task', task,
            data_dir,
            '--save-dir', data_dir,
            '--arch', arch,
            '--lr', '0.05',
            '--max-tokens', '500',
            '--max-epoch', '1',
            '--no-progress-bar',
            '--distributed-world-size', '1',
            '--num-workers', 0,
        ] + lang_flags + (extra_flags or []),
    )
    train.main(train_args)

    if run_validation:
        # test validation
        validate_parser = options.get_validation_parser()
        validate_args = options.parse_args_and_arch(
            validate_parser,
            [
                '--task', task,
                data_dir,
                '--path', os.path.join(data_dir, 'checkpoint_last.pt'),
                '--valid-subset', 'valid',
                '--max-tokens', '500',
                '--no-progress-bar',
            ] + lang_flags + (extra_valid_flags or [])
        )
        validate.main(validate_args)


def generate_main(data_dir, extra_flags=None):
    if extra_flags is None:
        extra_flags = [
            '--print-alignment',
        ]
    generate_parser = options.get_generation_parser()
    generate_args = options.parse_args_and_arch(
        generate_parser,
        [
            data_dir,
            '--path', os.path.join(data_dir, 'checkpoint_last.pt'),
            '--beam', '3',
            '--batch-size', '64',
            '--max-len-b', '5',
            '--gen-subset', 'valid',
            '--no-progress-bar',
        ] + (extra_flags or []),
    )

    # evaluate model in batch mode
    generate.main(generate_args)

    # evaluate model interactively
    generate_args.buffer_size = 0
    generate_args.input = '-'
    generate_args.max_sentences = None
    orig_stdin = sys.stdin
    sys.stdin = StringIO('h e l l o\n')
    interactive.main(generate_args)
    sys.stdin = orig_stdin


def preprocess_lm_data(data_dir):
    preprocess_parser = options.get_preprocessing_parser()
    preprocess_args = preprocess_parser.parse_args([
        '--only-source',
        '--trainpref', os.path.join(data_dir, 'train.out'),
        '--validpref', os.path.join(data_dir, 'valid.out'),
        '--testpref', os.path.join(data_dir, 'test.out'),
        '--destdir', data_dir,
    ])
    preprocess.main(preprocess_args)


def train_language_model(data_dir, arch, extra_flags=None, run_validation=False):
    train_parser = options.get_training_parser()
    train_args = options.parse_args_and_arch(
        train_parser,
        [
            '--task', 'language_modeling',
            data_dir,
            '--arch', arch,
            '--optimizer', 'adam',
            '--lr', '0.0001',
            '--criterion', 'adaptive_loss',
            '--adaptive-softmax-cutoff', '5,10,15',
            '--max-tokens', '500',
            '--tokens-per-sample', '500',
            '--save-dir', data_dir,
            '--max-epoch', '1',
            '--no-progress-bar',
            '--distributed-world-size', '1',
            '--ddp-backend', 'no_c10d',
        ] + (extra_flags or []),
    )
    train.main(train_args)

    if run_validation:
        # test validation
        validate_parser = options.get_validation_parser()
        validate_args = options.parse_args_and_arch(
            validate_parser,
            [
                '--task', 'language_modeling',
                data_dir,
                '--path', os.path.join(data_dir, 'checkpoint_last.pt'),
                '--valid-subset', 'valid',
                '--max-tokens', '500',
                '--no-progress-bar',
            ]
        )
        validate.main(validate_args)


def eval_lm_main(data_dir):
    eval_lm_parser = options.get_eval_lm_parser()
    eval_lm_args = options.parse_args_and_arch(
        eval_lm_parser,
        [
            data_dir,
            '--path', os.path.join(data_dir, 'checkpoint_last.pt'),
            '--no-progress-bar',
        ],
    )
    eval_lm.main(eval_lm_args)


def train_masked_language_model(data_dir, arch, extra_args=()):
    train_parser = options.get_training_parser()
    # TODO: langs should be in and out right?
    train_args = options.parse_args_and_arch(
        train_parser,
        [
            "--task",
            "cross_lingual_lm",
            data_dir,
            "--arch",
            arch,
            # Optimizer args
            "--optimizer",
            "adam",
            "--lr-scheduler",
            "reduce_lr_on_plateau",
            "--lr-shrink",
            "0.5",
            "--lr",
            "0.0001",
            "--min-lr",
            "1e-09",
            # dropout, attention args
            "--dropout",
            "0.1",
            "--attention-dropout",
            "0.1",
            # MLM args
            "--criterion",
            "masked_lm_loss",
            "--masked-lm-only",
            "--monolingual-langs",
            "in,out",
            "--num-segment",
            "5",
            # Transformer args: use a small transformer model for fast training
            "--encoder-layers",
            "1",
            "--encoder-embed-dim",
            "32",
            "--encoder-attention-heads",
            "1",
            "--encoder-ffn-embed-dim",
            "32",
            # Other training args
            "--max-tokens",
            "500",
            "--tokens-per-sample",
            "500",
            "--save-dir",
            data_dir,
            "--max-epoch",
            "1",
            "--no-progress-bar",
            "--distributed-world-size",
            "1",
            "--dataset-impl",
            "raw",
        ] + list(extra_args),
    )
    train.main(train_args)


if __name__ == '__main__':
    unittest.main()
