# Supplementary material
Source: ML conference proceedings conference paper supplement (https://proceedings.neurips.cc/paper_files/paper/2022/hash/35f805e65c77652efa731edc10c8e3a6-Abstract.html)
Supplement: Supplementary file 1 [file 35f805e65c77652efa731edc10c8e3a6-Supplemental-Conference.zip › Supplementary Material/code/tests/test_convtbc.py]

# Copyright (c) Facebook, Inc. and its affiliates.
#
# This source code is licensed under the MIT license found in the
# LICENSE file in the root directory of this source tree.

import torch
import unittest
from fairseq.modules import ConvTBC
import torch.nn as nn


class TestConvTBC(unittest.TestCase):

    def test_convtbc(self):
        # ksz, in_channels, out_channels
        conv_tbc = ConvTBC(4, 5, kernel_size=3, padding=1)
        # out_channels, in_channels, ksz
        conv1d = nn.Conv1d(4, 5, kernel_size=3, padding=1)

        conv_tbc.weight.data.copy_(conv1d.weight.data.transpose(0, 2))
        conv_tbc.bias.data.copy_(conv1d.bias.data)

        input_tbc = torch.randn(7, 2, 4, requires_grad=True)
        input1d = input_tbc.data.transpose(0, 1).transpose(1, 2)
        input1d.requires_grad = True

        output_tbc = conv_tbc(input_tbc)
        output1d = conv1d(input1d)

        self.assertAlmostEqual(output_tbc.data.transpose(0, 1).transpose(1, 2), output1d.data)

        grad_tbc = torch.randn(output_tbc.size())
        grad1d = grad_tbc.transpose(0, 1).transpose(1, 2).contiguous()

        output_tbc.backward(grad_tbc)
        output1d.backward(grad1d)

        self.assertAlmostEqual(conv_tbc.weight.grad.data.transpose(0, 2), conv1d.weight.grad.data)
        self.assertAlmostEqual(conv_tbc.bias.grad.data, conv1d.bias.grad.data)
        self.assertAlmostEqual(input_tbc.grad.data.transpose(0, 1).transpose(1, 2), input1d.grad.data)

    def assertAlmostEqual(self, t1, t2):
        self.assertEqual(t1.size(), t2.size(), "size mismatch")
        self.assertLess((t1 - t2).abs().max(), 1e-4)


if __name__ == '__main__':
    unittest.main()
