# Supplementary material
Source: ML conference proceedings conference paper supplement (https://proceedings.neurips.cc/paper_files/paper/2022/hash/35f805e65c77652efa731edc10c8e3a6-Abstract.html)
Supplement: Supplementary file 1 [file 35f805e65c77652efa731edc10c8e3a6-Supplemental-Conference.zip › Supplementary Material/code/tests/test_iterators.py]

# Copyright (c) Facebook, Inc. and its affiliates.
#
# This source code is licensed under the MIT license found in the
# LICENSE file in the root directory of this source tree.

import unittest

from fairseq.data import iterators


class TestIterators(unittest.TestCase):

    def test_counting_iterator(self):
        x = list(range(10))
        itr = iterators.CountingIterator(x)
        self.assertTrue(itr.has_next())
        self.assertEqual(next(itr), 0)
        self.assertEqual(next(itr), 1)
        itr.skip(3)
        self.assertEqual(next(itr), 5)
        itr.skip(3)
        self.assertEqual(next(itr), 9)
        self.assertFalse(itr.has_next())


if __name__ == '__main__':
    unittest.main()
