# Supplementary material
Source: ML conference proceedings conference paper supplement (https://proceedings.neurips.cc/paper_files/paper/2022/hash/35f805e65c77652efa731edc10c8e3a6-Abstract.html)
Supplement: Supplementary file 1 [file 35f805e65c77652efa731edc10c8e3a6-Supplemental-Conference.zip › Supplementary Material/code/tests/test_reproducibility.py]

# Copyright (c) Facebook, Inc. and its affiliates.
#
# This source code is licensed under the MIT license found in the
# LICENSE file in the root directory of this source tree.

import contextlib
from io import StringIO
import json
import os
import tempfile
import unittest

import torch

from . import test_binaries


class TestReproducibility(unittest.TestCase):

    def _test_reproducibility(
        self,
        name,
        extra_flags=None,
        delta=0.0001,
        resume_checkpoint='checkpoint1.pt',
        max_epoch=3,
    ):
        if extra_flags is None:
            extra_flags = []

        with tempfile.TemporaryDirectory(name) as data_dir:
            with self.assertLogs() as logs:
                test_binaries.create_dummy_data(data_dir)
                test_binaries.preprocess_translation_data(data_dir)

            # train epochs 1 and 2 together
            with self.assertLogs() as logs:
                test_binaries.train_translation_model(
                    data_dir, 'fconv_iwslt_de_en', [
                        '--dropout', '0.0',
                        '--log-format', 'json',
                        '--log-interval', '1',
                        '--max-epoch', str(max_epoch),
                    ] + extra_flags,
                )
            train_log, valid_log = map(lambda rec: json.loads(rec.msg), logs.records[-4:-2])

            # train epoch 2, resuming from previous checkpoint 1
            os.rename(
                os.path.join(data_dir, resume_checkpoint),
                os.path.join(data_dir, 'checkpoint_last.pt'),
            )
            with self.assertLogs() as logs:
                test_binaries.train_translation_model(
                    data_dir, 'fconv_iwslt_de_en', [
                        '--dropout', '0.0',
                        '--log-format', 'json',
                        '--log-interval', '1',
                        '--max-epoch', str(max_epoch),
                    ] + extra_flags,
                )
            train_res_log, valid_res_log = map(lambda rec: json.loads(rec.msg), logs.records[-4:-2])

            for k in ['train_loss', 'train_ppl', 'train_num_updates', 'train_gnorm']:
                self.assertAlmostEqual(float(train_log[k]), float(train_res_log[k]), delta=delta)
            for k in ['valid_loss', 'valid_ppl', 'valid_num_updates', 'valid_best_loss']:
                self.assertAlmostEqual(float(valid_log[k]), float(valid_res_log[k]), delta=delta)

    def test_reproducibility(self):
        self._test_reproducibility('test_reproducibility')

    @unittest.skipIf(not torch.cuda.is_available(), 'test requires a GPU')
    def test_reproducibility_fp16(self):
        self._test_reproducibility('test_reproducibility_fp16', [
            '--fp16',
            '--fp16-init-scale', '4096',
        ], delta=0.011)

    @unittest.skipIf(not torch.cuda.is_available(), 'test requires a GPU')
    def test_reproducibility_memory_efficient_fp16(self):
        self._test_reproducibility('test_reproducibility_memory_efficient_fp16', [
            '--memory-efficient-fp16',
            '--fp16-init-scale', '4096',
        ])

    def test_mid_epoch_reproducibility(self):
        self._test_reproducibility(
            'test_mid_epoch_reproducibility',
            ['--save-interval-updates', '3'],
            resume_checkpoint='checkpoint_1_3.pt',
            max_epoch=1,
        )


if __name__ == '__main__':
    unittest.main()
