# Supplementary material
Source: ML conference proceedings conference paper supplement (https://proceedings.neurips.cc/paper_files/paper/2022/hash/35f805e65c77652efa731edc10c8e3a6-Abstract.html)
Supplement: Supplementary file 1 [file 35f805e65c77652efa731edc10c8e3a6-Supplemental-Conference.zip › Supplementary Material/code/tests/test_train.py]

# Copyright (c) Facebook, Inc. and its affiliates.
#
# This source code is licensed under the MIT license found in the
# LICENSE file in the root directory of this source tree.

import contextlib
from io import StringIO
import unittest
from unittest.mock import MagicMock, patch

import torch

from fairseq import data, checkpoint_utils


def mock_trainer(epoch, num_updates, iterations_in_epoch):
    trainer = MagicMock()
    trainer.load_checkpoint.return_value = {
        'train_iterator': {
            'epoch': epoch,
            'iterations_in_epoch': iterations_in_epoch,
            'shuffle': False,
        },
    }
    trainer.get_num_updates.return_value = num_updates
    return trainer


def mock_dict():
    d = MagicMock()
    d.pad.return_value = 1
    d.eos.return_value = 2
    d.unk.return_value = 3
    return d


def get_trainer_and_epoch_itr(epoch, epoch_size, num_updates, iterations_in_epoch):
    tokens = torch.LongTensor(list(range(epoch_size))).view(1, -1)
    tokens_ds = data.TokenBlockDataset(
        tokens, sizes=[tokens.size(-1)], block_size=1, pad=0, eos=1, include_targets=False,
    )
    trainer = mock_trainer(epoch, num_updates, iterations_in_epoch)
    dataset = data.LanguagePairDataset(tokens_ds, tokens_ds.sizes, mock_dict(), shuffle=False)
    epoch_itr = data.EpochBatchIterator(
        dataset=dataset,
        collate_fn=dataset.collater,
        batch_sampler=[[i] for i in range(epoch_size)],
    )
    return trainer, epoch_itr


class TestLoadCheckpoint(unittest.TestCase):

    def setUp(self):
        self.args_mock = MagicMock()
        self.args_mock.optimizer_overrides = '{}'
        self.args_mock.reset_dataloader = False
        self.args_mock.reset_meters = False
        self.args_mock.reset_optimizer = False
        self.patches = {
            'os.makedirs': MagicMock(),
            'os.path.join': MagicMock(),
            'os.path.isfile': MagicMock(return_value=True),
            'os.path.isabs': MagicMock(return_value=False),
        }
        self.applied_patches = [patch(p, d) for p, d in self.patches.items()]
        [p.start() for p in self.applied_patches]

    def test_load_partial_checkpoint(self):

        with contextlib.redirect_stdout(StringIO()):
            trainer, epoch_itr = get_trainer_and_epoch_itr(2, 150, 200, 50)
            trainer.get_train_iterator = MagicMock(return_value=epoch_itr)

            _, epoch_itr = checkpoint_utils.load_checkpoint(self.args_mock, trainer)

            self.assertEqual(epoch_itr.epoch, 2)
            self.assertEqual(epoch_itr.iterations_in_epoch, 50)

            itr = epoch_itr.next_epoch_itr(shuffle=False)
            self.assertEqual(epoch_itr.epoch, 2)
            self.assertEqual(epoch_itr.iterations_in_epoch, 50)

            self.assertEqual(next(itr)['net_input']['src_tokens'][0].item(), 50)
            self.assertEqual(epoch_itr.iterations_in_epoch, 51)

            for _ in range(150 - 52):
                next(itr)
            self.assertEqual(epoch_itr.iterations_in_epoch, 149)
            self.assertTrue(itr.has_next())
            next(itr)
            self.assertFalse(itr.has_next())

            itr = epoch_itr.next_epoch_itr(shuffle=False)
            self.assertTrue(itr.has_next())
            self.assertEqual(epoch_itr.epoch, 3)
            self.assertEqual(epoch_itr.iterations_in_epoch, 0)

    def test_load_full_checkpoint(self):
        with contextlib.redirect_stdout(StringIO()):
            trainer, epoch_itr = get_trainer_and_epoch_itr(2, 150, 300, 150)
            trainer.get_train_iterator = MagicMock(return_value=epoch_itr)

            _, epoch_itr = checkpoint_utils.load_checkpoint(self.args_mock, trainer)
            itr = epoch_itr.next_epoch_itr(shuffle=False)

            self.assertEqual(epoch_itr.epoch, 3)
            self.assertEqual(epoch_itr.iterations_in_epoch, 0)
            self.assertEqual(next(itr)['net_input']['src_tokens'][0].item(), 0)

    def test_load_no_checkpoint(self):
        with contextlib.redirect_stdout(StringIO()):
            trainer, epoch_itr = get_trainer_and_epoch_itr(0, 150, 0, 0)
            trainer.get_train_iterator = MagicMock(return_value=epoch_itr)
            self.patches['os.path.isfile'].return_value = False

            _, epoch_itr = checkpoint_utils.load_checkpoint(self.args_mock, trainer)
            itr = epoch_itr.next_epoch_itr(shuffle=False)

            self.assertEqual(epoch_itr.epoch, 1)
            self.assertEqual(epoch_itr.iterations_in_epoch, 0)
            self.assertEqual(next(itr)['net_input']['src_tokens'][0].item(), 0)

    def tearDown(self):
        patch.stopall()


if __name__ == '__main__':
    unittest.main()
